# Supplementary material for: Enantioselective and collective total synthesis of pentacyclic 19-nor-clerodanes
Source: Royal Society of Chemistry journal article supplement (doi:10.1039/d3sc04335e), 2023-01-01

## *Supporting Information*

# **Enantioselective and Collective Total Synthesis of Pentacyclic 19-*nor*-Clerodanes**

Zhi-Mao Zhang, Junliang Zhang and Quan Cai\*

Department of Chemistry and Research Center for Molecular Recognition and Synthesis  
Fudan University, 220 Handan Rd., Shanghai 200433, China  
E-mail: quan\_cai@fudan.edu.cn

### **Table of Contents**

|                                                                                                  |    |
|--------------------------------------------------------------------------------------------------|----|
| 1. General Methods .....                                                                         | 2  |
| 2. Synthesis of 1,3-Cyclohexadiene Silane Ether <b>11</b> .....                                  | 3  |
| 3. Investigation of the Pivotal IEDDA Reaction .....                                             | 9  |
| 4. Total Synthesis of (+)-Teucvin .....                                                          | 15 |
| 5. Total Synthesis of (+)-Cracrosone A and (+)-Cracrosone E .....                                | 25 |
| 6. Total Synthesis of (+)-Montanin A and (+)-Teucvisin C .....                                   | 28 |
| 7. Total Synthesis of (+)-Teucrin A .....                                                        | 29 |
| 8. Enantioselective Synthesis of (+)-2-Hydroxyteuscorolide .....                                 | 33 |
| 9. Comparison of Natural Products with Synthetic 19- <i>nor</i> -Clerodane Diterpenoids .....    | 44 |
| 10. X-ray Crystallographic Data of <b>25</b> , (+)-Cracrosone E ( <b>7</b> ) and <b>38</b> ..... | 58 |
| 11. References .....                                                                             | 75 |
| 12. 2D NMR of (+)-Cracrosone A, (+)-Teucvisin C, Compound <b>30</b> and (+)-Cracrosone E .....   | 77 |
| 13. Copies of NMR Spectra .....                                                                  | 91 |

## 1. General Methods

Unless stated otherwise, all solvents and reagents were purified and dried according to standard methods prior to use. All reactions were carried out in flame-dried glassware under an atmosphere of argon with magnetic stirring. Reactions were monitored by thin-layer chromatography (TLC) carried out on Huanghai silica gel HSGF254 pre-coated plates (0.2 mm  $\pm$  0.03 mm) using UV light as visualizing agent and an ethanolic solution of phosphomolybdic acid, an aqueous solution of cerium sulfate or a basic aqueous solution of potassium permanganate as developing agents. Silica gel (300-400 mesh) purchased from Yantai Xinnuo Chemical Co. LTD was used for flash chromatography.  $^1\text{H}$  and  $^{13}\text{C}$  NMR spectra were recorded on a Bruker AVANCE III HD (400 MHz and 100 MHz, respectively) and internally referenced to residual portion solvent signals ( $\text{CDCl}_3$ ,  $\delta_{\text{H}} = 7.26$  ppm,  $\delta_{\text{C}} = 77.00$  ppm;  $\text{CD}_3\text{CN}$ ,  $\delta_{\text{H}} = 1.94$  ppm,  $\delta_{\text{C}} = 118.26$  ppm; acetone- $\text{d}_6$ ,  $\delta_{\text{H}} = 2.05$  ppm,  $\delta_{\text{C}} = 206.26$  ppm or pyridine- $\text{d}_5$ ,  $\delta_{\text{H}} = 7.20$  ppm,  $\delta_{\text{C}} = 123.44$  ppm, DMSO- $\text{d}_6$ ,  $\delta_{\text{H}} = 2.50$  ppm,  $\delta_{\text{C}} = 39.52$  ppm). The following abbreviations were used to designate multiplicities: s = singlet, d = doublet, t = triplet, q = quartet, m = multiplet, and br = broad. High-resolution mass spectra (HRMS) were recorded on an Agilent Technologies 6224 TOF LC/MS using ESI (electrospray ionization) or an Agilent GCQTOF mass spectrometer using EI (electronic ionization). Optical Rotations were measured on a Rudolph Autopol III S2 polarimeter.  $^{13}\text{C}$  NMR spectra of teucrin A (**6**) was recorded on an Agilent DD2 (100 MHz).

## 2. Synthesis of 1,3-Cyclohexadiene Silane Ether **11**

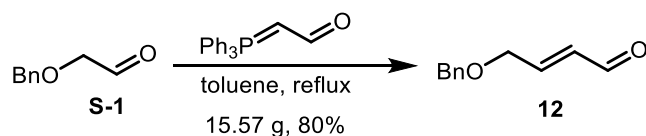

To a solution of **S-1** (16.5 g, 110 mmol) in toluene (500 mL) was added  $\text{Ph}_3\text{PCHCHO}$  (33.5 g, 110 mmol). After stirring at reflux for 1 h, the reaction mixture was concentrated under reduced pressure. The residue was purified by flash column chromatography (petroleum ether: ethyl acetate = 30: 1 to 10: 1) to afford unsaturated aldehyde **12** (15.6 g, 80%) as a colorless oil.

**12**:  $^1\text{H NMR}$  (400 MHz,  $\text{CDCl}_3$ )  $\delta$  9.58 (d,  $J = 8.0$  Hz, 1H), 7.40–7.29 (m, 6H), 6.85 (dt,  $J = 16.0, 4.0$  Hz, 1H), 6.41 (dd,  $J = 16.0, 8.0$  Hz, 1H), 4.59 (s, 2H), 4.29 (dd,  $J = 4.0, 1.6$  Hz, 2H);  $^{13}\text{C NMR}$  (100 MHz,  $\text{CDCl}_3$ )  $\delta$  193.2, 153.0, 137.4, 131.7, 128.5, 127.9, 127.6, 72.9, 68.5. The spectroscopic data were identical with those reported in the literature.<sup>1</sup>

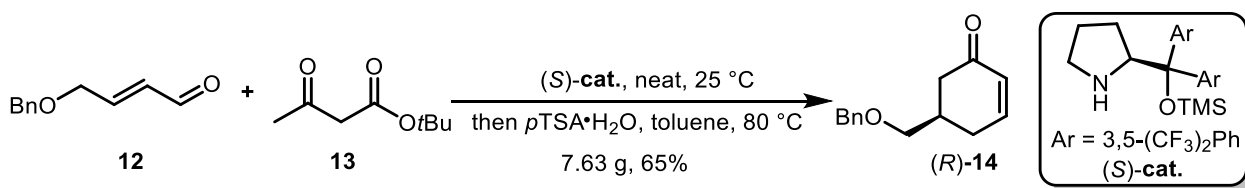

To a mixture of **(S)-cat.** (3.25 g, 5.43 mmol) and unsaturated aldehyde **12** (14.36 g, 81.5 mmol) was added *tert*-butyl acetoacetate **13** (8.59 g, 54.3 mmol). The resulting mixture was stirred at 25 °C for 18 h until **13** was consumed completely. Then, toluene (76 mL) and *p*TSA•H<sub>2</sub>O (2.07 g, 10.9 mmol) were added. After stirring at 80 °C for 6 h to remove the *tert*-butyl carboxylate group, the reaction mixture was concentrated under reduced pressure. The residue was purified by flash column chromatography (petroleum ether: ethyl acetate = 20: 1 to 5: 1) to afford enone **(R)-14**.

**(R)-14**: Pale yellow oil (7.63 g, 65%, 93% ee); the ee value was determined by CHIRALPAK AD-H column, hexane/*i*PrOH = 99/1, 1.0 mL/min,  $\lambda = 210$  nm.  $t_{\text{R}}(\text{minor}) = 20.86$  min,  $t_{\text{R}}(\text{major}) = 22.25$  min;  $[\alpha]_{\text{D}}^{29} = -52.23$  ( $c = 1.06$ ,  $\text{CHCl}_3$ );  $^1\text{H NMR}$  (400 MHz,  $\text{CDCl}_3$ )  $\delta$  7.28–7.16 (m, 5H), 6.86 (ddd,  $J = 10.0, 5.2, 2.4$  Hz, 1H), 5.98–5.87 (m, 1H), 4.42 (s, 2H), 3.38–3.29 (m, 2H), 2.47–2.28 (m, 3H), 2.27–2.11 (m, 2H);  $^{13}\text{C NMR}$  (100 MHz,  $\text{CDCl}_3$ )  $\delta$  199.2, 149.4, 138.1, 129.7, 128.4, 127.6, 127.5, 73.2, 73.1, 41.1, 35.6, 29.0. The spectroscopic data were identical with those reported in the literature.<sup>2,3</sup>

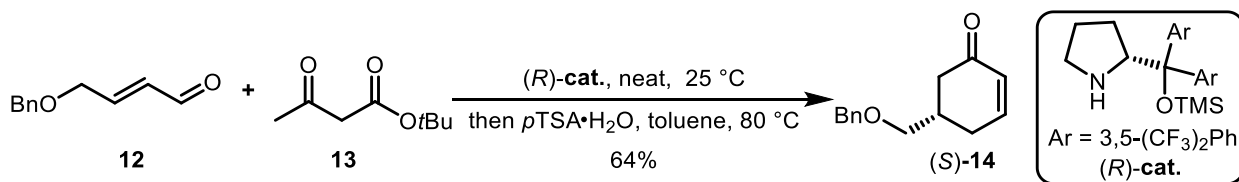

To a mixture of (*R*)-cat. (1.20 g, 8.0 mmol) and unsaturated aldehyde **12** (2.11 g, 12.0 mmol) was added *tert*-butyl acetoacetate **13** (1.20 g, 8.0 mmol). The resulting mixture was stirred at 25 °C for 18 h until **13** was completely consumed. Then, toluene (11 mL) and *p*TSA·H<sub>2</sub>O (304 mg, 1.6 mmol) were added. After stirring at 80 °C for 6 h to remove the *tert*-butyl carboxylate group, the reaction mixture was concentrated under reduced pressure. The residue was purified by flash column chromatography (petroleum ether: ethyl acetate = 20: 1 to 5: 1) to afford enone (*S*)-**14**.

(*S*)-**14**: Pale yellow oil (1.10 g, 64%, 92% ee); the ee value was determined by CHIRALPAK AD-H column, hexane/*i*PrOH = 99/1, 1.0 mL/min,  $\lambda = 210$  nm.  $t_{\text{R}}(\text{major}) = 20.44$  min,  $t_{\text{R}}(\text{minor}) = 22.06$  min;  $[\alpha]_{\text{D}}^{20} = +51.15$  ( $c = 1.03$ , CHCl<sub>3</sub>); <sup>1</sup>H NMR (400 MHz, CDCl<sub>3</sub>)  $\delta$  7.38–7.27 (m, 5H), 6.97 (ddd,  $J = 10.0, 4.8, 2.4$  Hz, 1H), 6.03 (dd,  $J = 10.0, 1.2$  Hz, 1H), 4.52 (s, 2H), 3.48–3.38 (m, 2H), 2.57–2.39 (m, 3H), 2.35–2.22 (m, 2H); <sup>13</sup>C NMR (100 MHz, CDCl<sub>3</sub>)  $\delta$  199.3, 149.4, 138.1, 129.7, 128.4, 127.7, 127.5, 73.2, 73.1, 41.1, 35.6, 29.0. The spectroscopic data were identical with those reported in the literature.<sup>4</sup>

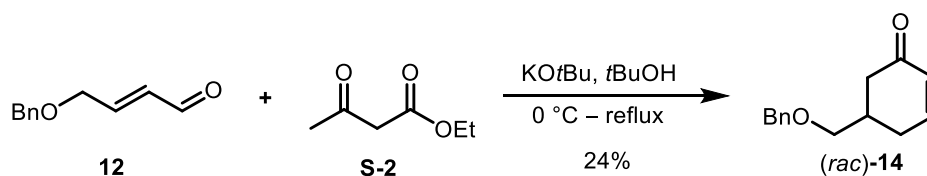

To a stirred solution of **12** (176 mg, 1.0 mmol) and ethyl acetoacetate **S-2** (130 mg, 1.0 mmol) in *t*BuOH (1.0 mL) was added a catalytic amount of KO*t*Bu (5.6 mg, 0.05 mmol) at 0 °C. After stirring at 0 °C for 30 min, to the reaction mixture was added the second batch of KO*t*Bu (22.4 mg, 0.20 mmol), and then heated at 90 °C for 7 h. Upon cooling to room temperature, the reaction mixture was quenched with HCl (1.0 mL, aq., 1.0 M), diluted with a 1: 1 mixture of Et<sub>2</sub>O (5.0 mL) and benzene (5.0 mL), washed with NaOH (5.0 mL, aq., 1.0 M) and then brine (5.0 mL). The organic layer was dried over anhydrous Na<sub>2</sub>SO<sub>4</sub>, and concentrated under reduced pressure. The residue was purified by flash column chromatography (silica gel, petroleum ether: ethyl acetate = 15: 1 to 5: 1) to afford (*rac*)-**14** (52.1 mg, 24% yield) as a pale yellow oil.

(*rac*)-**14**: <sup>1</sup>H NMR (400 MHz, CDCl<sub>3</sub>)  $\delta$  7.38–7.27 (m, 5H), 6.97 (ddd,  $J = 10.0, 5.4, 2.4$  Hz, 1H), 6.03 (dd,  $J = 10.0, 2.4$  Hz, 1H), 4.52 (s, 2H), 3.48–3.39 (m, 2H), 2.57–2.39 (m, 3H), 2.35–2.23 (m,

2H);  $^{13}\text{C}$  NMR (100 MHz,  $\text{CDCl}_3$ )  $\delta$  199.3, 149.4, 138.1, 129.7, 128.4, 127.7, 127.5, 73.2, 73.1, 41.1, 35.6, 29.0. The spectroscopic data were identical with those reported in the literature.<sup>5</sup>

(*rac*)-**14**: CHIRALPAK AD-H column, hexane/*i*PrOH, 99:1 v/v,  $v = 1.0$  mL/min,  $\lambda = 210$  nm, 25 °C.  
 $t_{\text{R}}$ (minor) = 20.18 min,  $t_{\text{R}}$ (major) = 21.72 min.

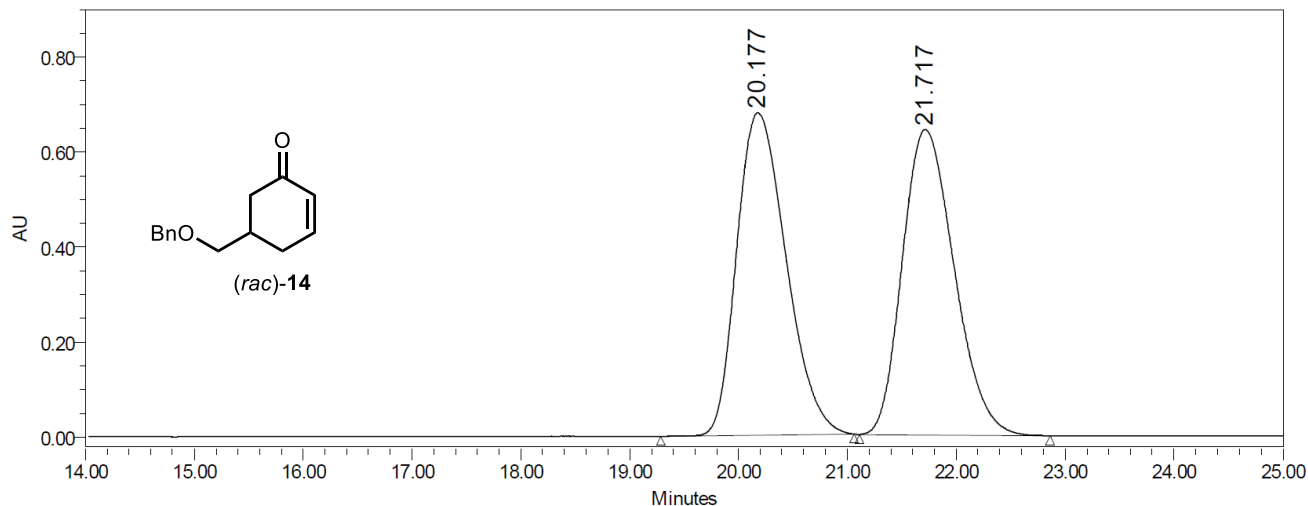

|   | RT     | Area     | % Area | Height |
|---|--------|----------|--------|--------|
| 1 | 20.177 | 21332534 | 50.10  | 678194 |
| 2 | 21.717 | 21251075 | 49.90  | 642223 |

(*R*)-**14**: CHIRALPAK AD-H column, hexane/*i*PrOH, 99:1 v/v,  $v = 1.0$  mL/min,  $\lambda = 210$  nm, 25 °C.  
 $t_{\text{R}}$ (minor) = 20.86 min,  $t_{\text{R}}$ (major) = 22.25 min.

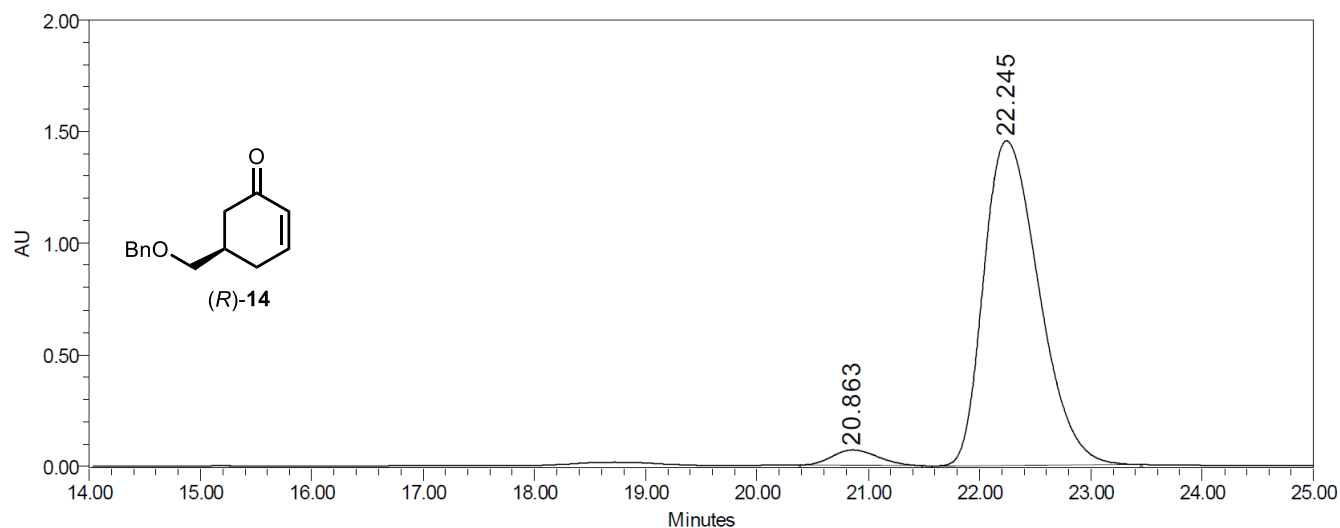

|   | RT     | Area     | % Area | Height  |
|---|--------|----------|--------|---------|
| 1 | 20.863 | 1954634  | 3.75   | 68148   |
| 2 | 22.245 | 50104590 | 96.25  | 1453990 |

(*S*)-**14**: CHIRALPAK AD-H column, hexane/*i*PrOH, 99:1 v/v,  $v = 1.0$  mL/min,  $\lambda = 210$  nm, 25 °C.

$t_R(\text{major}) = 20.44$  min,  $t_R(\text{minor}) = 22.06$  min.

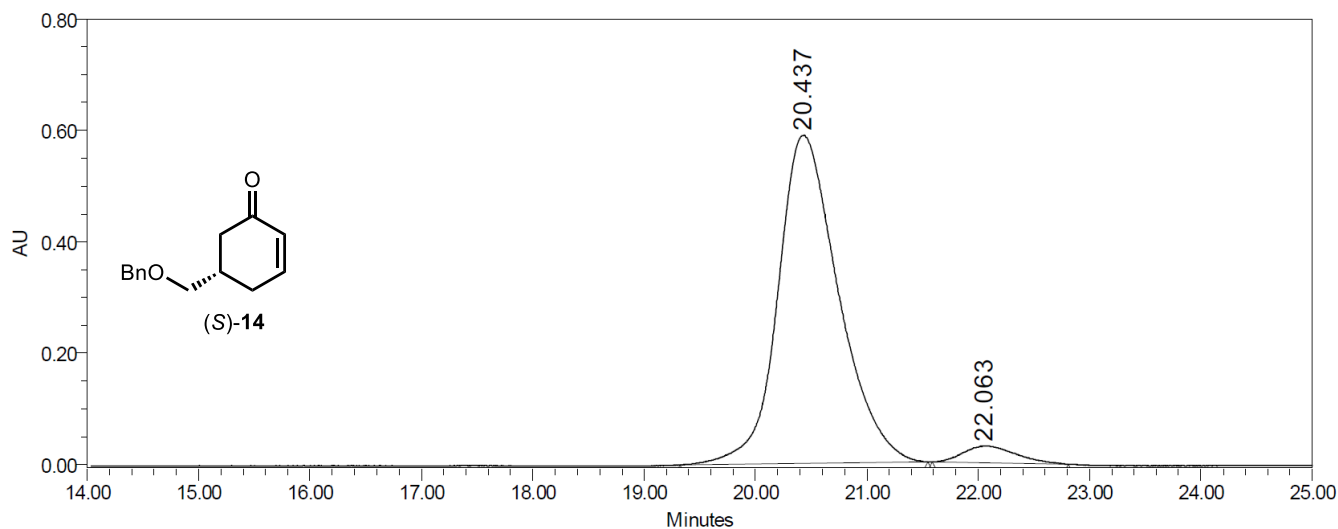

|   | RT     | Area     | % Area | Height |
|---|--------|----------|--------|--------|
| 1 | 20.437 | 22304743 | 95.76  | 589467 |
| 2 | 22.063 | 988245   | 4.24   | 30104  |

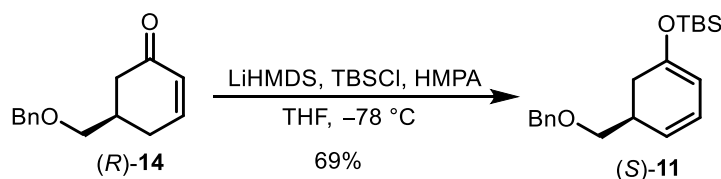

To a stirred solution of cyclohex-2-en-1-one (*R*)-**14** (93% ee, 8.65 g, 40.0 mmol) and HMPA (17.4 mL, 100 mmol) in THF (160 mL) was added LiHMDS (48 mL, 48.0 mmol, 1.0 M in THF) dropwise at -78 °C. The reaction was stirred at this temperature for 1 h, and then allowed to warm to 0 °C and maintained for another 1 h. After cooling to -78 °C, the reaction mixture was added TBSCl (9.04 g in 80 mL THF, 60.0 mmol) dropwise. After stirring at -78 °C for 3 h, the reaction was quenched with NaHCO<sub>3</sub> (200 mL, aq., sat.). The aqueous layer was extracted with petroleum ether (200 mL × 3). The combined organic extracts were washed with brine, dried over Na<sub>2</sub>SO<sub>4</sub>, and concentrated under reduced pressure. The residue was purified by flash column chromatography (silica gel, 100% petroleum ether) to afford (*S*)-**11** (9.07 g, 69% yield) as a colorless oil.

(*S*)-**11**:  $[\alpha]_D^{29} = -77.57$  ( $c = 1.02$ , CHCl<sub>3</sub>); <sup>1</sup>H NMR (400 MHz, CDCl<sub>3</sub>)  $\delta$  7.43–7.27 (m, 5H), 5.89 (ddd,  $J = 9.2, 5.6, 1.6$  Hz, 1H), 5.34 (dd,  $J = 9.2, 4.0$  Hz, 1H), 5.11 (d,  $J = 5.6$  Hz, 1H), 4.55 (s, 2H), 3.49–3.42 (m, 2H), 2.88–2.78 (m, 1H), 2.40–2.27 (m, 2H), 0.97 (s, 9H), 0.21 (s, 3H), 0.20 (s, 3H); <sup>13</sup>C NMR (100 MHz, CDCl<sub>3</sub>)  $\delta$  153.2, 138.5, 128.3, 127.54, 127.46, 125.3, 119.3, 101.6, 73.0, 72.3, 35.8,

31.8, 25.6, 18.0, -4.4, -4.5; **FT-IR** (neat):  $\nu_{\max}$  = 2928, 2857, 1647, 1585, 1472, 1362, 1252, 1219, 1028, 899, 833, 779, 694  $\text{cm}^{-1}$ ; **HRMS** (EI): exact mass calculated for:  $\text{C}_{20}\text{H}_{30}\text{O}_2\text{Si}$   $[\text{M}]^+$ : 330.2010, found: 330.2016.

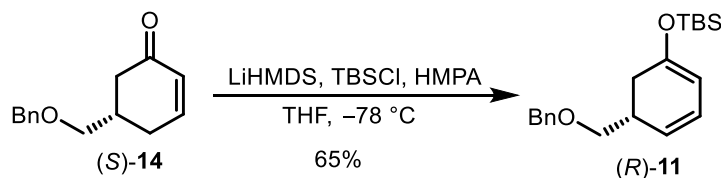

To a stirred solution of cyclohex-2-en-1-one (*S*)-**14** (92% ee, 626 mg, 2.89 mmol) and HMPA (1.26 mL, 7.23 mmol) in THF (12 mL) was added LiHMDS (3.45 mL, 3.45 mmol, 1.0 M in THF) dropwise at  $-78\text{ }^\circ\text{C}$ . The reaction was stirred at this temperature for 1 h, and then allowed to warm to  $0\text{ }^\circ\text{C}$  and maintained for another 1 h. After cooling to  $-78\text{ }^\circ\text{C}$ , the reaction mixture was added TBSCl (654 mg in 6.0 mL THF, 4.34 mmol) dropwise. After stirring at  $-78\text{ }^\circ\text{C}$  for 3 h, the reaction was quenched with  $\text{NaHCO}_3$  (20 mL, aq., sat.). The aqueous layer was extracted with petroleum ether (20 mL  $\times$  3). The combined organic extracts were washed with brine, dried over  $\text{Na}_2\text{SO}_4$ , and concentrated under reduced pressure. The residue was purified by flash column chromatography (silica gel, 100% petroleum ether) to afford (*R*)-**11** (624 mg, 65% yield) as a colorless oil.

(*R*)-**11**:  $[\alpha]_{\text{D}}^{32} = +75.51$  ( $c = 1.05$ ,  $\text{CHCl}_3$ );  **$^1\text{H}$  NMR** (400 MHz,  $\text{CDCl}_3$ )  $\delta$  7.35–7.34 (m, 4H), 7.31–7.27 (m, 1H), 5.86 (ddd,  $J = 9.2, 5.6, 1.6$  Hz, 1H), 5.31 (dd,  $J = 9.6, 4.0$  Hz, 1H), 5.07 (d,  $J = 5.6$  Hz, 1H), 4.52 (s, 2H), 3.46–3.39 (m, 2H), 2.84–2.75 (m, 1H), 2.36–2.23 (m, 2H), 0.94 (s, 9H), 0.17 (s, 3H), 0.16 (s, 3H);  **$^{13}\text{C}$  NMR** (100 MHz,  $\text{CDCl}_3$ )  $\delta$  153.2, 138.5, 128.4, 127.6, 127.5, 125.3, 119.4, 101.7, 73.0, 72.4, 35.8, 31.8, 25.3, 18.1, -4.36, -4.41; **FT-IR** (neat):  $\nu_{\max}$  = 2930, 2857, 1647, 1585, 1361, 1252, 899, 833, 779, 696  $\text{cm}^{-1}$ ; **HRMS** (EI): exact mass calculated for:  $\text{C}_{20}\text{H}_{30}\text{O}_2\text{Si}$   $[\text{M}]^+$ : 330.2010, found: 330.2011.

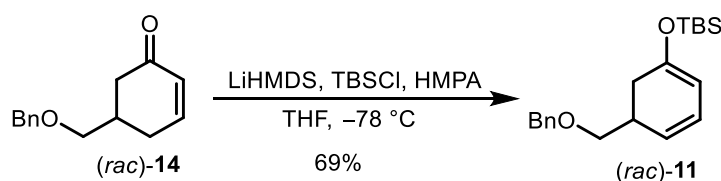

To a stirred solution of cyclohex-2-en-1-one (*rac*)-**14** (387 mg, 1.79 mmol) and HMPA (780  $\mu\text{L}$ , 4.48 mmol) in THF (7.2 mL) was added LiHMDS (2.15 mL, 2.15 mmol, 1.0 M in THF) dropwise at  $-78\text{ }^\circ\text{C}$ . The reaction was stirred at this temperature for 1 h, and then allowed to warm to  $0\text{ }^\circ\text{C}$  and maintained for another 1 h. After cooling to  $-78\text{ }^\circ\text{C}$ , the reaction mixture was added TBSCl (405 mg in 3.6 mL THF, 2.69 mmol) dropwise. After stirring at  $-78\text{ }^\circ\text{C}$  for 3 h, the reaction was quenched with

NaHCO<sub>3</sub> (10 mL, aq., sat.). The aqueous layer was extracted with petroleum ether (10 mL × 3). The combined organic extracts were washed with brine, dried over Na<sub>2</sub>SO<sub>4</sub>, and concentrated under reduced pressure. The residue was purified by flash column chromatography (silica gel, 100% petroleum ether) to afford (*rac*)-**11** (409 mg, 69% yield) as a colorless oil.

(*rac*)-**11**: **<sup>1</sup>H NMR** (400 MHz, CDCl<sub>3</sub>) δ 7.39–7.27 (m, 5H), 5.86 (ddd, *J* = 8.8, 6.0, 1.6 Hz, 1H), 5.31 (dd, *J* = 9.6, 4.0 Hz, 1H), 5.08 (d, *J* = 5.6 Hz, 1H), 4.52 (s, 2H), 3.48–3.38 (m, 2H), 2.87–2.74 (m, 1H), 2.38–2.22 (m, 2H), 0.94 (s, 9H), 0.18 (s, 3H), 0.17 (s, 3H); **<sup>13</sup>C NMR** (100 MHz, CDCl<sub>3</sub>) δ 153.2, 138.5, 128.3, 127.6, 127.5, 125.3, 119.3, 101.7, 73.0, 72.4, 35.8, 31.8, 25.6, 18.1, –4.37, –4.42; **FT-IR** (neat): ν<sub>max</sub> = 2930, 2857, 1647, 1583, 1361, 1250, 899, 833, 779, 694 cm<sup>-1</sup>; **HRMS** (ED): exact mass calculated for: C<sub>20</sub>H<sub>30</sub>O<sub>2</sub>Si [M]<sup>+</sup>: 330.2010, found: 330.2010.



### 3. Investigation of the Pivotal IEDDA Reaction

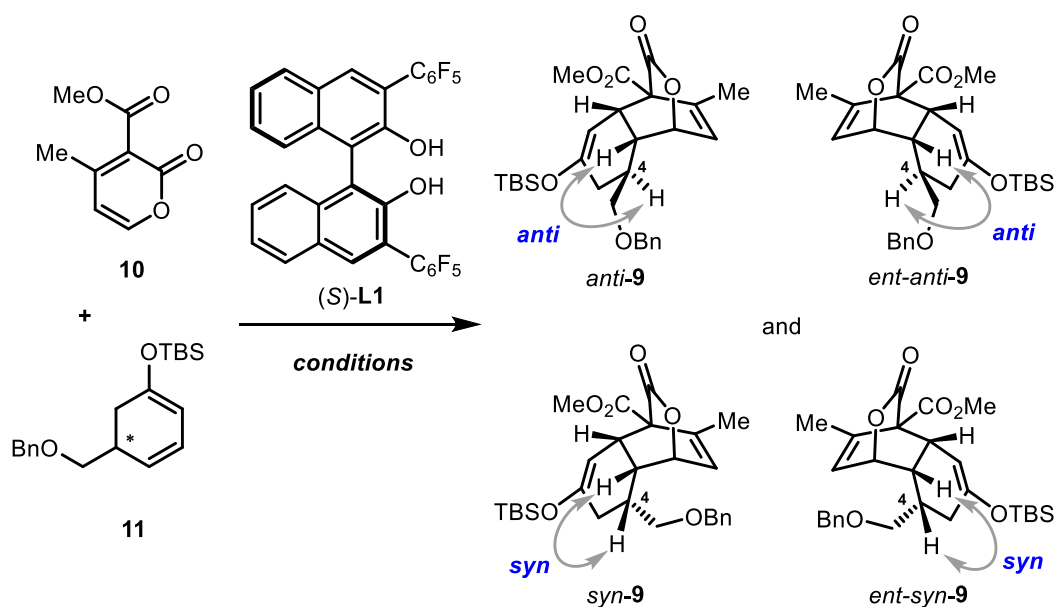

| Entry          | Conditions <sup>a</sup>                                                                         | Results                           | Products                                                               |
|----------------|-------------------------------------------------------------------------------------------------|-----------------------------------|------------------------------------------------------------------------|
| 1 <sup>b</sup> | ( <i>S</i> )- <b>11</b> (1.5 equiv)<br>Yb(OTf) <sub>3</sub>                                     | 78%, 3.1:1 dr                     | <i>anti</i> - <b>9</b> , 94% ee<br><i>ent-syn</i> - <b>9</b> , 94% ee  |
| 2              | ( <i>rac</i> )- <b>11</b> (2.0 equiv)<br>Yb(OTf) <sub>3</sub> , ( <i>S</i> )- <b>L1</b> , DIPEA | 73%, 1.2:1 dr                     | <i>anti</i> - <b>9</b> , 78% ee<br><i>syn</i> - <b>9</b> , 90% ee      |
| 3              | ( <i>R</i> )- <b>11</b> (1.5 equiv)<br>Yb(OTf) <sub>3</sub> , ( <i>S</i> )- <b>L1</b> , DIPEA   | 75%, 3.8:1 dr                     | <i>syn</i> - <b>9</b> , >99% ee<br><i>ent-anti</i> - <b>9</b> , 72% ee |
| 4              | ( <i>S</i> )- <b>11</b> (1.5 equiv)<br>Yb(OTf) <sub>3</sub> , ( <i>S</i> )- <b>L1</b> , DIPEA   | 87%, 10:1 dr<br>( <b>4.34 g</b> ) | <i>anti</i> - <b>9</b> , 98% ee<br><i>ent-syn</i> - <b>9</b> , 19% ee  |

<sup>a</sup> Reaction conditions: **10** (0.10 mmol), **11** (0.15 mmol), Yb(OTf)<sub>3</sub> (10 mol%), (*S*)-**L1** (12 mol%), DIPEA (24 mol%), 4 Å M.S. (25.0 mg), DCM (0.25 mL) at 25 °C. <sup>b</sup> (*S*)-**L1** was not added. DCM = dichloromethane, DIPEA = *N,N*-diisopropylethylamine, M.S. = molecular sieves.

(*rac*)-**9**: To a mixture of anhydrous Yb(OTf)<sub>3</sub> (6.2 mg, 0.010 mol) and freshly activated 4 Å molecular sieves (25.0 mg) in DCM (0.25 mL) was added 4-methyl-2-pyrone **10** (16.8 mg, 0.10 mmol). After the reaction mixture was stirred at 0 °C for 15 min, silyl cyclohexadienol ether (*rac*)-**11** (49.6 mg, 0.15 mmol) was added in one portion. The reaction mixture was stirred at 25 °C for 1 h until **10** was consumed completely (monitored by TLC). The crude mixture was purified directly by flash column chromatography (silica gel, petroleum ether: ethyl acetate = 10: 1) to afford lactone (*rac*)-**9** (41.6 mg, 84%, 3.0: 1 dr) as a colorless oil. This compound was separated by CHIRALPAK IC column, hexane/*i*PrOH, 80: 20 v/v, v = 1.0 mL/min, λ = 210 nm, 25 °C; t<sub>R</sub>(*anti*-**9**) = 24.29 min, t<sub>R</sub>(*syn*-**9**) = 29.22 min, t<sub>R</sub>(*ent-syn*-**9**) = 33.45 min, t<sub>R</sub>(*ent-anti*-**9**) = 39.55 min.

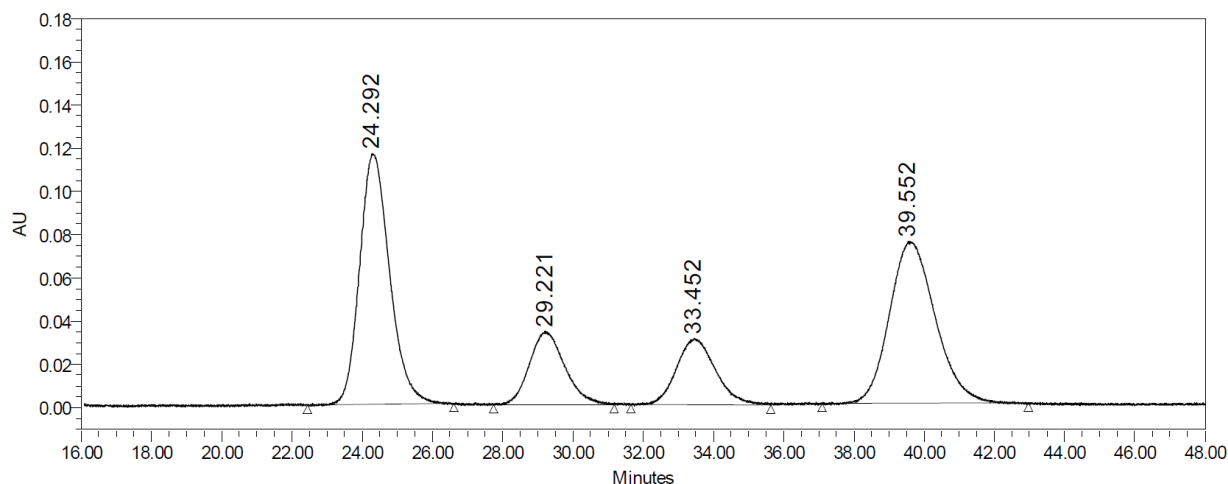

|   | RT     | Area    | % Area | Height |
|---|--------|---------|--------|--------|
| 1 | 24.292 | 6857178 | 37.53  | 116055 |
| 2 | 29.221 | 2329160 | 12.75  | 33858  |
| 3 | 33.452 | 2326957 | 12.74  | 30534  |
| 4 | 39.552 | 6755590 | 36.98  | 74811  |

**Entry 1:** To a mixture of anhydrous  $\text{Yb}(\text{OTf})_3$  (6.2 mg, 0.010 mol) and freshly activated 4 Å molecular sieves (25.0 mg) in DCM (0.25 mL) was added 4-methyl-2-pyrone **10** (16.8 mg, 0.10 mmol) at 0 °C, and an orange color appeared immediately. After the mixture was stirred at 0 °C for another 15 min, silyl cyclohexadienol ether (*S*)-**11** (49.6 mg, 0.15 mmol) was added in one portion. The reaction mixture was stirred at 25 °C for 1 h until **10** was consumed completely (monitored by TLC). The crude mixture was purified directly by flash column chromatography (silica gel, petroleum ether: ethyl acetate = 10: 1) to afford *anti*-**9** and *ent-syn*-**9** (38.9 mg, 78%, 3.1: 1 dr, *anti*-**9**: 94% ee; *ent-syn*-**9**: 94% ee) as a colorless mixture. The ee values of *anti*-**9** and *ent-syn*-**9** were determined by CHIRALPAK IC column, hexane/*i*PrOH, 80: 20 v/v,  $v = 1.0$  mL/min,  $\lambda = 210$  nm, 25 °C; *anti*-**9**: [ $t_{\text{R}}(\text{major}) = 23.62$  min,  $t_{\text{R}}(\text{minor}) = 39.22$  min], *ent-syn*-**9**: [ $t_{\text{R}}(\text{minor}) = 28.46$  min,  $t_{\text{R}}(\text{major}) = 32.67$  min].

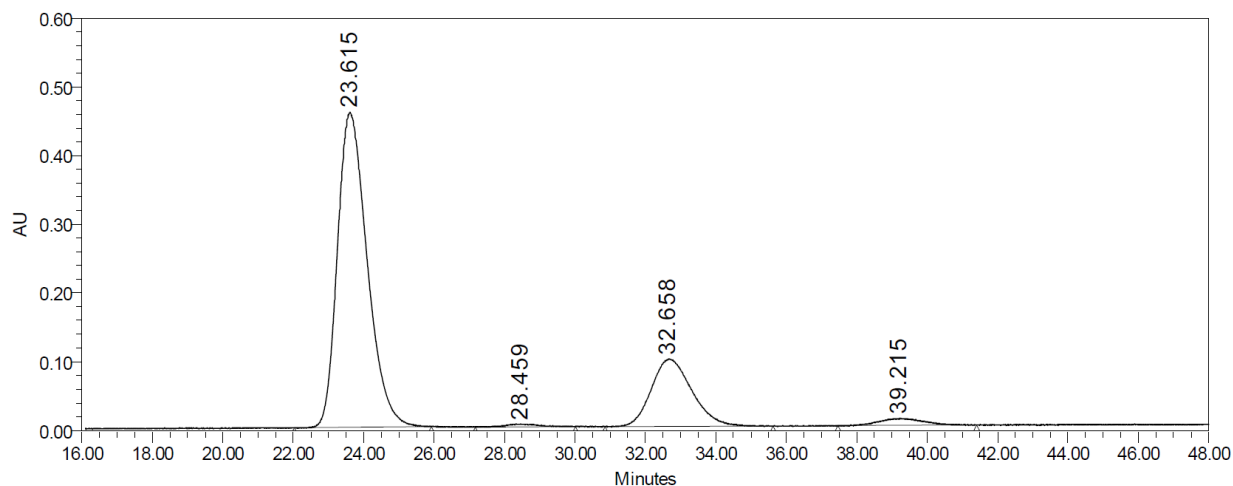

|   | RT     | Area     | % Area | Height |
|---|--------|----------|--------|--------|
| 1 | 23.615 | 26716704 | 74.95  | 458614 |
| 2 | 28.459 | 237168   | 0.67   | 4116   |
| 3 | 32.658 | 7841987  | 22.00  | 97876  |
| 4 | 39.215 | 848114   | 2.38   | 10123  |

**Entry 2:** To a mixture of anhydrous  $\text{Yb}(\text{OTf})_3$  (6.2 mg, 0.010 mol), (*S*)-**L1** (7.4 mg, 0.012 mol) and freshly activated 4 Å molecular sieves (25.0 mg) in DCM (0.25 mL) was added DIPEA (4.0  $\mu\text{L}$ , 0.024 mmol) at 0 °C. The mixture was then stirred at this temperature for 30 min to afford a pale-yellow suspension. Then, 4-methyl-2-pyrone **10** (16.8 mg, 0.10 mmol) was added and a dark-blue color appeared immediately. After the mixture was stirred at 0 °C for another 15 min, silyl cyclohexadienol ether (*rac*)-**11** (66.1 mg, 0.20 mmol) was added in one portion. The reaction mixture was stirred at 25 °C for 5 h until **10** was consumed completely (monitored by TLC). The crude mixture was purified directly by flash column chromatography (silica gel, petroleum ether: ethyl acetate = 10: 1) to afford lactone *anti*-**9** and *syn*-**9** (36.4 mg, 73%, 1.2: 1 dr, *anti*-**9**: 78% ee, *syn*-**9**: 90% ee) as a colorless mixture. The ee values of *anti*-**9** and *syn*-**9** were determined by CHIRALPAK IC column, hexane/*i*PrOH, 80: 20 v/v,  $v = 1.0 \text{ mL/min}$ ,  $\lambda = 210 \text{ nm}$ , 25 °C; *anti*-**9**: [ $t_{\text{R}}(\text{major}) = 23.52 \text{ min}$ ,  $t_{\text{R}}(\text{minor}) = 37.92 \text{ min}$ ], *syn*-**9**: [ $t_{\text{R}}(\text{major}) = 28.02 \text{ min}$ ,  $t_{\text{R}}(\text{minor}) = 32.11 \text{ min}$ ].

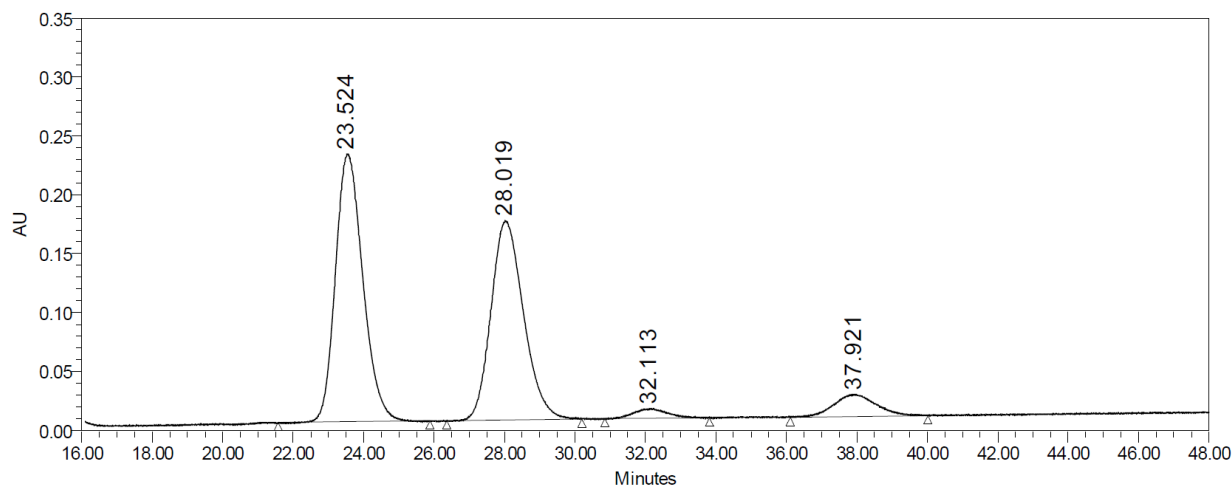

|   | RT     | Area     | % Area | Height |
|---|--------|----------|--------|--------|
| 1 | 23.524 | 12239905 | 48.59  | 227656 |
| 2 | 28.019 | 10860385 | 43.11  | 169582 |
| 3 | 32.113 | 546170   | 2.17   | 8501   |
| 4 | 37.921 | 1545273  | 6.13   | 18840  |

**Entry 3:** To a mixture of anhydrous  $\text{Yb}(\text{OTf})_3$  (6.2 mg, 0.010 mol), (*S*)-**L1** (7.4 mg, 0.012 mol) and freshly activated 4 Å molecular sieves (25.0 mg) in DCM (0.25 mL) was added DIPEA (4.0  $\mu\text{L}$ , 0.024 mmol) at 0 °C. The mixture was then stirred at this temperature for 30 min to afford a pale-yellow suspension. Then, 4-methyl-2-pyrone **10** (16.8 mg, 0.10 mmol) was added and a dark-blue color appeared immediately. After the mixture was stirred at 0 °C for another 15 min, silyl cyclohexadienol ether (*R*)-**11** (49.6 mg, 0.15 mmol) was added in one portion. The reaction mixture was stirred at 25 °C for 4 h until **10** was consumed completely (monitored by TLC). The crude mixture was purified directly by flash column chromatography (silica gel, petroleum ether: ethyl acetate = 10: 1) to afford lactone *syn*-**9** and *ent-anti*-**9** (37.2 mg, 75%, 3.8: 1 dr, *syn*-**9**: 99% ee, *ent-anti*-**9**: 72% ee) as a colorless mixture. The ee values of *syn*-**9** and *ent-anti*-**9** were determined by CHIRALPAK IC column, hexane/*i*PrOH, 80: 20 v/v,  $v = 1.0 \text{ mL/min}$ ,  $\lambda = 210 \text{ nm}$ , 25 °C; *syn*-**9**: [ $t_{\text{R}}(\text{major}) = 29.24 \text{ min}$ ,  $t_{\text{R}}(\text{minor}) = 33.91 \text{ min}$ ], *ent-anti*-**9**: [ $t_{\text{R}}(\text{minor}) = 24.45 \text{ min}$ ,  $t_{\text{R}}(\text{major}) = 40.00 \text{ min}$ ].

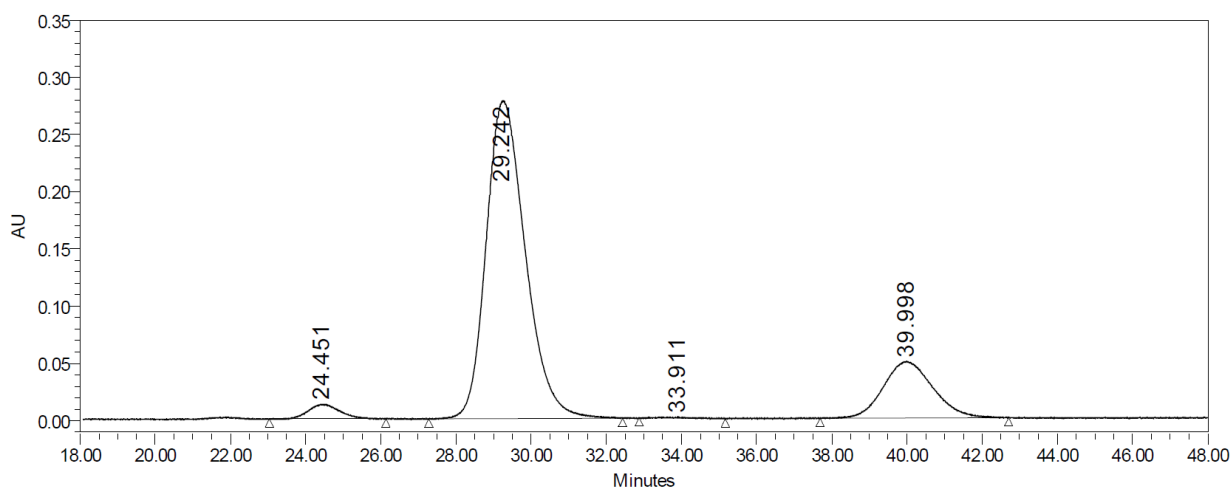

|   | RT     | Area     | % Area | Height |
|---|--------|----------|--------|--------|
| 1 | 24.451 | 743957   | 2.94   | 13049  |
| 2 | 29.242 | 20051682 | 79.18  | 277943 |
| 3 | 33.911 | 44917    | 0.18   | 1161   |
| 4 | 39.998 | 4483845  | 17.71  | 49540  |

**Entry 4:** To a mixture of anhydrous  $\text{Yb}(\text{OTf})_3$  (620 mg, 1.0 mmol), (*S*)-**L1** (742 mg, 1.2 mmol) and freshly activated 4 Å molecular sieves (2.50 g) in DCM (25 mL) was added DIPEA (400  $\mu\text{L}$ , 2.3 mmol) at 0 °C. The mixture was then stirred at this temperature for 30 min to afford a pale-yellow suspension. Then, 4-methyl-2-pyrone **10** (1.68 g, 10.0 mmol) was added and a dark-blue color appeared immediately. After the mixture was stirred at 0 °C for another 15 min, silyl cyclohexadienol ether (*S*)-**11** (4.96 g, 15.0 mmol) was added in one portion. The reaction mixture was stirred at 25 °C for 4 h until **10** was consumed completely (monitored by TLC). The reaction mixture was diluted with DCM (25 mL), filtered through a celite pad, and concentrated under reduced pressure. The residue was purified by flash column chromatography (silica gel, petroleum ether: ethyl acetate = 10: 1) to afford lactone *anti*-**9** and *ent-syn*-**9** (4.34 g, 87%, 10: 1 dr, *anti*-**9**: 98% ee, *ent-syn*-**9**: 19% ee) as a colorless mixture. The ee values of *anti*-**9** and *ent-syn*-**9** were determined by CHIRALPAK IC column, hexane/*i*PrOH, 80:20 v/v,  $v = 1.0$  mL/min,  $\lambda = 210$  nm, 25 °C; major isomer: [ $t_{\text{R}}(\text{major}) = 24.05$  min,  $t_{\text{R}}(\text{minor}) = 39.51$  min], minor isomer: [ $t_{\text{R}}(\text{minor}) = 29.07$  min,  $t_{\text{R}}(\text{major}) = 33.18$  min].

*anti*-**9**:  $[\alpha]_{\text{D}}^{23} = -35.70$  ( $c = 1.02$ ,  $\text{CHCl}_3$ );  $^1\text{H NMR}$  (400 MHz,  $\text{CDCl}_3$ )  $\delta$  7.38–7.29 (m, 5H), 6.07–6.05 (m, 1H), 5.11 (dd,  $J = 5.2, 3.2$  Hz, 1H), 4.71 (d,  $J = 3.2$  Hz, 1H), 4.56–4.48 (m, 2H), 3.90 (s, 3H), 3.46–3.39 (m, 2H), 3.27–3.24 (m, 1H), 2.52 (ddd,  $J = 10.2, 6.4, 2.8$  Hz, 1H), 1.98 (d,  $J = 1.6$  Hz, 3H), 1.93–1.82 (m, 3H), 0.89 (s, 9H), 0.10 (s, 3H), 0.08 (s, 3H);  $^{13}\text{C NMR}$  (100 MHz,  $\text{CDCl}_3$ )  $\delta$  171.0, 168.1, 153.1, 141.4, 138.0, 128.5, 127.8, 127.6, 124.6, 100.7, 76.9, 73.6, 73.3, 62.9, 52.5, 40.9, 36.5,

36.2, 30.5, 25.6, 20.7, 18.0, -4.35, -4.44; **FT-IR** (neat):  $\nu_{\text{max}} = 2957, 2860, 1740, 1668, 1364, 1271, 1207, 1082, 1003, 835, 779, 735, 698 \text{ cm}^{-1}$ ; **HRMS** (ESI): exact mass calculated for:  $\text{C}_{28}\text{H}_{38}\text{NaO}_6\text{Si}$   $[\text{M}+\text{Na}]^+$ : 521.2335, found: 521.2352.

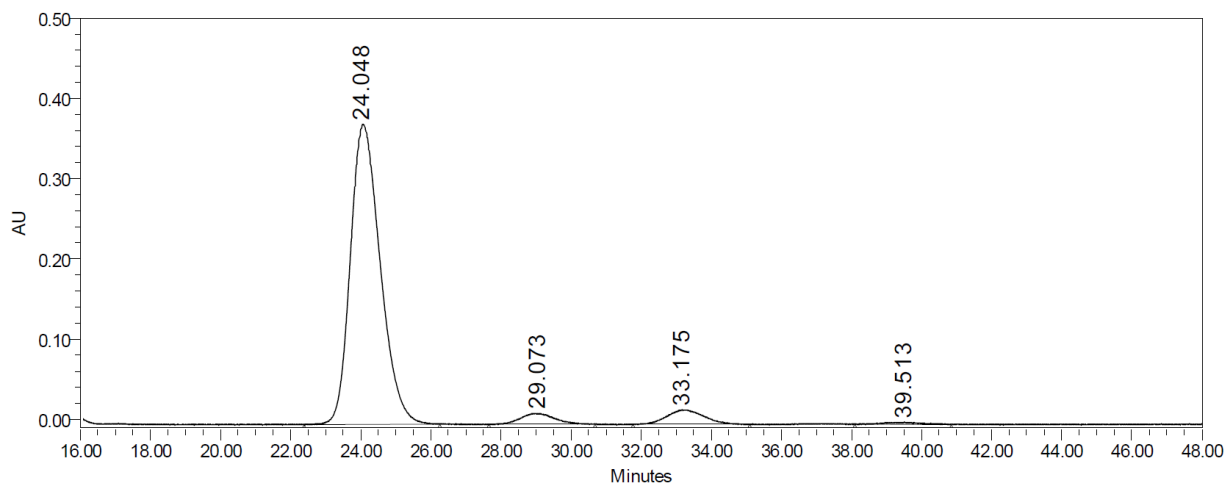

|   | RT     | Area     | % Area | Height |
|---|--------|----------|--------|--------|
| 1 | 24.048 | 21955663 | 90.26  | 373356 |
| 2 | 29.073 | 887467   | 3.65   | 13504  |
| 3 | 33.175 | 1299683  | 5.34   | 17987  |
| 4 | 39.513 | 181508   | 0.75   | 2653   |

#### 4. Total Synthesis of (+)-Teucvin

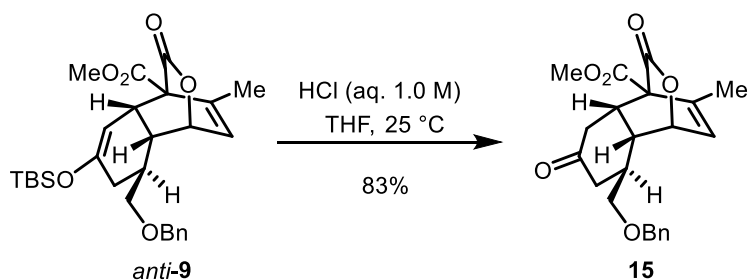

To a solution of *anti*-**9** (4.61 g, 9.24 mmol) in THF (92 mL) was added HCl (4.62 mL, 4.62 mmol, aq., 1.0 M) dropwise at 25 °C. The reaction mixture was stirred at this temperature for 4 h. After the reaction was complete, the reaction mixture was diluted with water (200 mL) and extracted with DCM (100 mL  $\times$  3). The combined extracts were washed with brine, dried over Na<sub>2</sub>SO<sub>4</sub> and concentrated under reduced pressure. The residue was purified by flash column chromatography (silica gel, petroleum ether: ethyl acetate = 1: 1) to afford **15** (2.93 g, 83% yield) as a white solid.

**15**: the m.p. could not be determined because this compound will undergo retro-Diels-Alder extrusion of CO<sub>2</sub> before melting;  $[\alpha]_D^{27} = +121.07$  ( $c = 1.05$ , CHCl<sub>3</sub>); <sup>1</sup>H NMR (400 MHz, CDCl<sub>3</sub>)  $\delta$  7.38–7.28 (m, 5H), 6.25–6.23 (m, 1H), 5.35 (dd,  $J = 5.2, 3.2$  Hz, 1H), 4.52 (dd,  $J = 20.0, 12.0$  Hz, 2H), 3.86 (s, 3H), 3.51–3.44 (m, 2H), 2.93 (ddd,  $J = 13.6, 9.6, 4.4$  Hz, 1H), 2.58–2.52 (m, 2H), 2.35 (dd,  $J = 18.6, 3.6$  Hz, 1H), 2.13 (dd,  $J = 18.6, 13.6$  Hz, 1H), 2.04 (d,  $J = 1.6$  Hz, 3H), 1.91 (dd,  $J = 15.2, 13.6$  Hz, 1H), 1.85–1.75 (m, 1H); <sup>13</sup>C NMR (100 MHz, CDCl<sub>3</sub>)  $\delta$  208.8, 169.9, 167.1, 140.8, 137.5, 128.5, 127.9, 127.5, 125.3, 74.7, 73.3, 72.2, 61.7, 52.7, 42.6, 40.9, 38.9, 35.1, 33.3, 20.7; FT-IR (neat):  $\nu_{\text{max}} = 2963, 1759, 1713, 1443, 1366, 1327, 1125, 1098, 1074, 991, 920, 818, 741, 700$  cm<sup>-1</sup>; HRMS (ESI): exact mass calculated for: C<sub>22</sub>H<sub>24</sub>O<sub>6</sub>Na [M+Na]<sup>+</sup>: 407.1465, found: 407.1457.

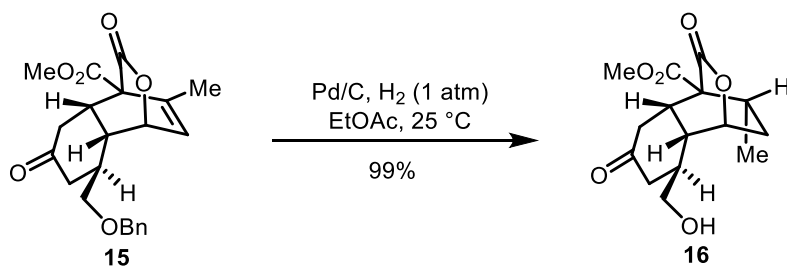

To a solution of **15** (2.33 g, 6.06 mmol) in EtOAc (303 mL) was added Pd/C (1.29 g, 1.21 mmol, 10% w/w in carbon). The mixture was stirred at 25 °C under H<sub>2</sub> (1 atm) for 24 h. The reaction mixture was filtered through a short pad of Celite and concentrated under reduced pressure. The residue was purified by flash column chromatography (silica gel, petroleum ether: ethyl acetate = 1: 2) to afford **16** (1.77 g, 99 % yield) as a white solid.

**16**: m.p. 164.8-166.0 °C;  $[\alpha]_D^{28} = +80.16$  ( $c = 1.14$ ,  $\text{CHCl}_3$ );  $^1\text{H NMR}$  (400 MHz,  $\text{CDCl}_3$ )  $\delta$  4.94 (dd,  $J = 5.2, 3.2$  Hz, 1H), 3.81 (s, 3H), 3.69–3.63 (h,  $J = 2.0$  Hz, 2H), 2.96–2.89 (m, 1H), 2.75–2.57 (m, 3H), 2.54–2.36 (m, 4H), 2.22–2.13 (m, 2H), 1.72 (dd,  $J = 14.4, 8.0$  Hz, 1H), 1.28 (d,  $J = 7.2$  Hz, 3H);  $^{13}\text{C NMR}$  (100 MHz,  $\text{CDCl}_3$ )  $\delta$  209.6, 172.9, 168.6, 76.3, 64.0, 55.5, 52.7, 41.1, 40.0, 39.7, 35.3, 31.5, 30.0, 28.4, 19.3; **FT-IR** (neat):  $\nu_{\text{max}} = 3541, 2965, 1734, 1705, 1435, 1332, 1260, 1111, 1057, 991, 893$   $\text{cm}^{-1}$ ; **HRMS** (ESI): exact mass calculated for:  $\text{C}_{15}\text{H}_{20}\text{O}_6\text{Na}$   $[\text{M}+\text{Na}]^+$ : 319.1152, found: 319.1155.

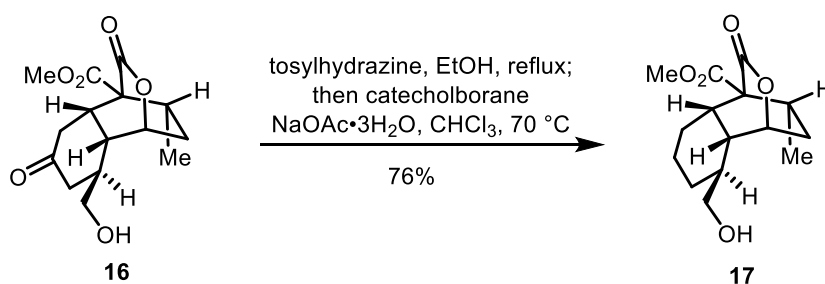

To a suspension of tosylhydrazine (512 mg, 2.75 mmol) in EtOH (12 mL) was added ketone **16** (740 mg, 2.50 mmol) at 25 °C. The resulting mixture was stirred under reflux for 2 h, and then concentrated under reduced pressure to afford the corresponding tosylhydrazone intermediate as a crude mixture. The residue was dissolved in  $\text{CHCl}_3$  (42 mL) and catecholborane (2.75 mL, 2.75 mmol) was added slowly at 0 °C. The reaction mixture was stirred at this temperature for 2 h. Then  $\text{NaOAc}\cdot\text{3H}_2\text{O}$  (680 mg, 5.00 mmol) was added and the resulting mixture was stirred under 70 °C for 50 min. After cooling to 25 °C, the reaction mixture was filtered. The solid was washed with  $\text{CHCl}_3$  (30 mL). The combined filtrates were concentrated under reduced pressure. The residue was purified by flash column chromatography (silica gel, petroleum ether: ethyl acetate = 1: 1) to afford **17** (539 mg, 76 % yield) as a colorless oil.

**17**:  $[\alpha]_D^{26} = -58.41$  ( $c = 1.02$ ,  $\text{CHCl}_3$ );  $^1\text{H NMR}$  (400 MHz,  $\text{CDCl}_3$ )  $\delta$  4.87 (dd,  $J = 5.2, 3.2$  Hz, 1H), 3.77 (s, 3H), 3.50 (d,  $J = 4.8$  Hz, 2H), 2.61–2.45 (m, 2H), 2.33–2.25 (m, 2H), 2.04–1.99 (m, 1H), 1.81–1.68 (m, 3H), 1.66–1.59 (m, 3H), 1.47–1.37 (m, 1H), 1.23 (d,  $J = 7.2$  Hz, 3H);  $^{13}\text{C NMR}$  (100 MHz,  $\text{CDCl}_3$ )  $\delta$  174.1, 169.6, 77.3, 65.9, 56.1, 52.2, 41.0, 35.3, 33.8, 30.1, 28.4, 23.2, 22.3, 20.1, 19.2; **FT-IR** (neat):  $\nu_{\text{max}} = 3512, 2940, 2882, 1732, 1460, 1381, 1331, 1256, 1209, 1099, 1065, 993, 816, 735$   $\text{cm}^{-1}$ ; **HRMS** (ESI): exact mass calculated for:  $\text{C}_{15}\text{H}_{22}\text{NaO}_5$   $[\text{M}+\text{Na}]^+$ : 305.1365, found: 305.1358.



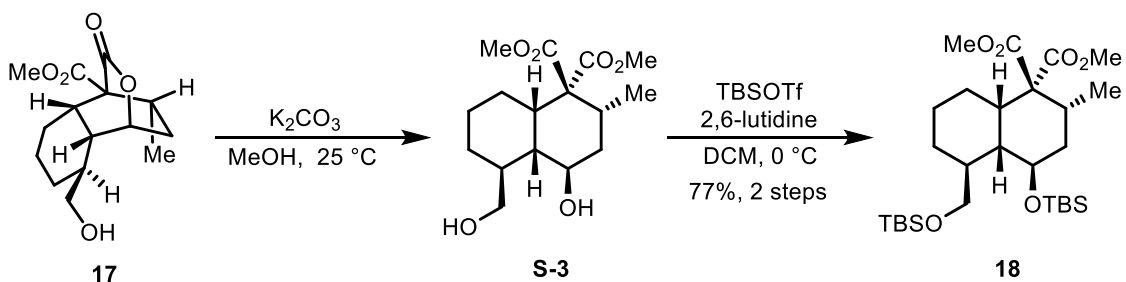

To a solution of lactone **17** (1.01 g, 3.59 mmol) in anhydrous MeOH (36 mL) was added  $\text{K}_2\text{CO}_3$  (1.24 g, 8.99 mmol) at 25 °C. After stirring at this temperature for 6 h, the reaction mixture was neutralized with AcOH (18 mL, aq., 0.5 M). The mixture was extracted with EtOAc (20 mL  $\times$  3). The combined extracts were washed with brine, dried over  $\text{Na}_2\text{SO}_4$  and concentrated under reduced pressure. The crude **S-3** was used directly in the next step without further purification.

To a solution of crude **S-3** in DCM (90 mL) was added 2,6-lutidine (2.51 mL, 21.6 mmol) and TBSOTf (2.48 mL, 10.8 mmol) at 0 °C. The reaction mixture was stirred for 1 h at 0 °C, and then quenched with  $\text{NaHCO}_3$  (50 mL, aq., sat.). The aqueous layer was extracted with DCM (50 mL  $\times$  3). The combined extracts were dried over  $\text{Na}_2\text{SO}_4$  and concentrated under reduced pressure. The residue was purified by flash column chromatography (silica gel, petroleum ether: ethyl acetate = 50: 1) to afford **18** (1.50 g, 77%) as a colorless oil.

**18**:  $[\alpha]_{\text{D}}^{24} = -24.00$  ( $c = 1.01$ ,  $\text{CHCl}_3$ );  $^1\text{H NMR}$  (400 MHz,  $\text{CDCl}_3$ )  $\delta$  4.04 (td,  $J = 10.4, 4.4$  Hz, 1H), 3.69 (s, 3H), 3.72–3.68 (m, 1H), 3.66 (s, 3H), 3.55 (dd,  $J = 10.0, 6.4$  Hz, 1H), 2.86 (br, 1H), 2.78 (d,  $J = 11.2$  Hz, 1H), 2.19 (br, 1H), 1.81–1.77 (m, 2H), 1.67–1.60 (m, 2H), 1.51–1.39 (m, 5H), 1.18 (d,  $J = 7.2$  Hz, 3H), 0.861 (s, 9H), 0.855 (s, 9H), 0.044 (s, 3H), 0.037 (s, 3H), 0.01 (s, 6H);  $^{13}\text{C NMR}$  (100 MHz,  $\text{CDCl}_3$ )  $\delta$  171.6, 170.5, 64.6, 64.4, 62.3, 52.8, 52.1, 43.2, 39.8, 38.1, 35.1, 32.3, 26.1, 25.9, 25.8, 22.6, 22.1, 18.4, 18.2, 18.0,  $-4.1, -4.7, -5.29, -5.32$ ; **FT-IR** (neat):  $\nu_{\text{max}} = 2928, 2856, 1734, 1472, 1431, 1256, 1219, 1200, 1084, 1040, 831, 772, 667$   $\text{cm}^{-1}$ ; **HRMS** (ESI): exact mass calculated for:  $\text{C}_{28}\text{H}_{54}\text{NaO}_6\text{Si}_2$   $[\text{M}+\text{Na}]^+$ : 565.3357, found: 565.3350.

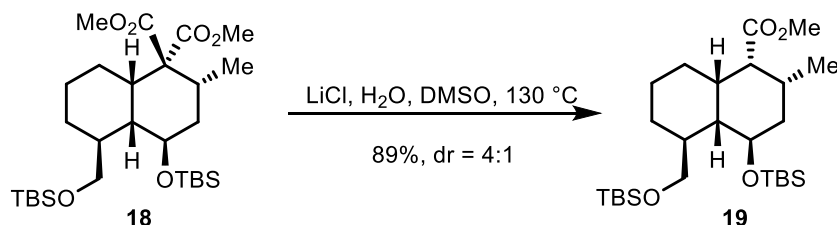

To a solution of **18** (496 mg, 0.91 mmol) in DMSO (91 mL) was added LiCl (388 mg, 9.15 mmol) and  $\text{H}_2\text{O}$  (824 mg, 45.7 mmol) at 25 °C. After stirring at 130 °C for 18 h, the reaction mixture was cooled to 25 °C, and diluted with water (500 mL). The resulting mixture was extracted with  $\text{Et}_2\text{O}$  (200

mL × 3). The combined extracts were washed with water and brine, dried over Na<sub>2</sub>SO<sub>4</sub> and concentrated under reduced pressure. The residue was purified by flash column chromatography (silica gel, petroleum ether: ethyl acetate = 50: 1) to afford **19** (394 mg for both isomers, 89% yield, 4: 1 dr) as a colorless oil.

**19**: [ $\alpha$ ]<sub>D</sub><sup>27</sup> = -10.62 (*c* = 1.01, CHCl<sub>3</sub>); **<sup>1</sup>H NMR** (400 MHz, CDCl<sub>3</sub>)  $\delta$  4.21–4.14 (m, 1H), 3.69–3.44 (m, 5H), 2.52 (t, *J* = 5.2 Hz, 1H), 2.45–2.28 (m, 2H), 2.22–2.14 (m, 1H), 1.96–1.92 (m, 1H), 1.70–1.59 (m, 1H), 1.53–1.23 (m, 7H), 1.03 (d, *J* = 2.8 Hz, 3H), 0.89–0.87 (m, 18H), 0.05–0.02 (m, 12H); **<sup>13</sup>C NMR** (100 MHz, CDCl<sub>3</sub>)  $\delta$  176.6, 67.3, 66.7, 51.1, 51.0, 49.9, 49.4, 46.3, 46.2, 37.0, 36.6, 35.1, 32.6, 30.5, 29.5, 28.9, 26.0, 25.9, 21.7, 20.7, 20.5, 18.5, 18.3, 18.0, -4.3, -4.7, -4.475, -4.478, -5.3, -5.4, -5.5; **FT-IR** (neat):  $\nu_{\max}$  = 2928, 2857, 1734, 1472, 1387, 1360, 1252, 1165, 1088, 1053, 1005, 974, 833, 772, 669 cm<sup>-1</sup>; **HRMS** (ESI): exact mass calculated for: C<sub>26</sub>H<sub>52</sub>NaO<sub>4</sub>Si<sub>2</sub> [M+Na]<sup>+</sup>: 507.3302, found: 507.3299.

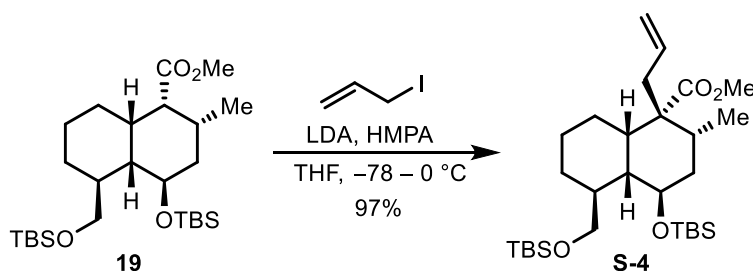

To a solution of **19** (382 mg, 0.79 mmol) in THF (16 mL) was added LDA (3.15 mL, 3.15 mmol, 1.0 M in THF) at -78 °C. After stirring at this temperature for 5 h, the reaction mixture was added HMPA (565 mg, 3.15 mmol) and allyl iodide (265 mg, 1.58 mmol). After stirring at 0 °C for 2 h, the reaction mixture was quenched with NH<sub>4</sub>Cl (16 mL, aq., sat.). The aqueous layer was extracted with Et<sub>2</sub>O (20 mL × 3). The combined extracts were washed with brine, dried over Na<sub>2</sub>SO<sub>4</sub>, and concentrated under reduced pressure. The residue was purified by flash column chromatography (silica gel, petroleum ether: ethyl acetate = 50: 1) to afford **S-4** (402 mg, 97% yield) as a colorless oil.

**S-4**: [ $\alpha$ ]<sub>D</sub><sup>29</sup> = -26.29 (*c* = 0.99, CHCl<sub>3</sub>); **<sup>1</sup>H NMR** (400 MHz, CDCl<sub>3</sub>)  $\delta$  5.72–5.61 (m, 1H), 5.05–5.01 (m, 2H), 4.16–4.10 (m, 1H), 3.65–3.54 (m, 5H), 2.52 (ddd, *J* = 21.6, 14.4, 7.2 Hz, 2H), 2.23–2.17 (m, 2H), 2.12–2.10 (m, 1H), 1.83–1.75 (m, 2H), 1.71–1.62 (m, 2H), 1.56–1.46 (m, 3H), 1.43–1.33 (m, 2H), 1.12 (d, *J* = 6.8 Hz, 3H), 0.90 (s, 18H), 0.08–0.05 (m, 12H); **<sup>13</sup>C NMR** (100 MHz, CDCl<sub>3</sub>)  $\delta$  175.7, 134.2, 117.6, 65.6, 65.3, 53.4, 50.8, 41.9, 38.2, 35.2, 32.1, 32.0, 26.9, 26.0, 22.3, 19.1, 18.3, 18.1, -4.1, -4.6, -5.3; **FT-IR** (neat):  $\nu_{\max}$  = 2928, 2860, 1734, 1472, 1252, 1198, 1092, 1005, 837, 773, 743 cm<sup>-1</sup>; **HRMS** (ESI): exact mass calculated for: C<sub>29</sub>H<sub>56</sub>NaO<sub>4</sub>Si<sub>2</sub> [M+Na]<sup>+</sup>: 547.3615, found: 547.3609.

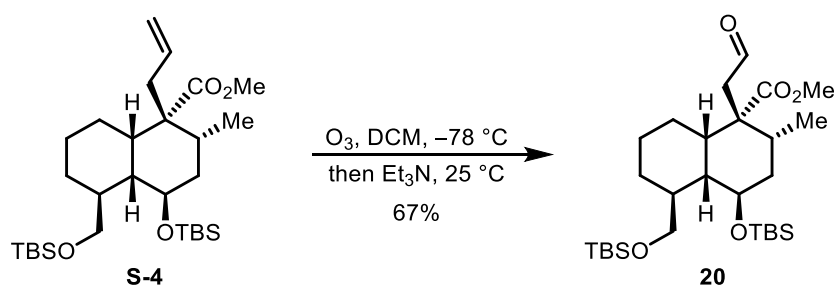

To a solution of **S-4** (468 mg, 0.89 mmol) in DCM (89 mL) was bubbled with ozone at  $-78\text{ }^\circ\text{C}$  until the solution turned blue. After the excess ozone was excluded by the argon stream,  $\text{Et}_3\text{N}$  (247  $\mu\text{L}$ , 1.78 mmol) was added dropwise at  $-78\text{ }^\circ\text{C}$ . The reaction mixture was stirred at  $25\text{ }^\circ\text{C}$  for 2 h and then concentrated under reduced pressure. The residue was purified by flash column chromatography (silica gel, petroleum ether: ethyl acetate = 20: 1) to afford aldehyde **20** (312 mg, 67% yield) as a colorless oil.

**20**:  $[\alpha]_{\text{D}}^{28} = -25.52$  ( $c = 1.07$ ,  $\text{CHCl}_3$ );  $^1\text{H NMR}$  (400 MHz,  $\text{CDCl}_3$ )  $\delta$  9.73 (s, 1H), 4.16 (br, 1H), 3.68 (s, 3H), 3.59–3.50 (m, 2H), 2.78 (dd,  $J = 15.6, 3.2$  Hz, 1H), 2.70 (dd,  $J = 15.6, 2.4$  Hz, 1H), 2.20–2.15 (m, 3H), 1.97 (br, 1H), 1.74–1.48 (m, 5H), 1.37–1.36 (m, 3H), 1.09 (d,  $J = 5.2$  Hz, 3H), 0.88 (s, 9H), 0.87 (s, 9H), 0.05–0.03 (m, 12H);  $^{13}\text{C NMR}$  (100 MHz,  $\text{CDCl}_3$ )  $\delta$  201.7, 175.1, 65.7, 65.3, 51.5, 51.4, 50.3, 38.4, 37.4, 35.1, 32.6, 26.8, 25.9, 25.8, 21.9, 18.2, 18.0,  $-4.3$ ,  $-4.7$ ,  $-5.35$ ,  $-5.36$ ; **FT-IR** (neat):  $\nu_{\text{max}} = 2934, 2855, 1721, 1472, 1250, 1194, 1084, 1061, 833, 772, 667\text{ cm}^{-1}$ ; **HRMS** (ESI): exact mass calculated for:  $\text{C}_{28}\text{H}_{54}\text{O}_5\text{NaSi}_2$   $[\text{M}+\text{Na}]^+$ : 549.3402, found: 549.3403.

**Table S1** 1,2-Addition of 3-Furanyl Metal Reagent to Aldehyde **20**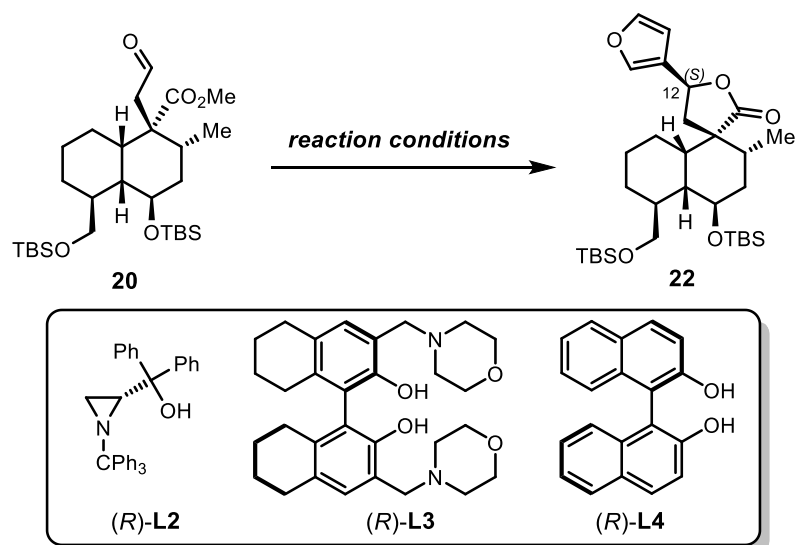

| Entry | Conditions <sup>a</sup>                                                                                                                               | Yield <sup>b</sup> | dr <sup>c</sup> |
|-------|-------------------------------------------------------------------------------------------------------------------------------------------------------|--------------------|-----------------|
| 1     | 3-bromofuran (3.0 equiv.), <i>n</i> BuLi (3.0 equiv.), THF, -78 °C                                                                                    | 72%                | 1.5:1.0         |
| 2     | 3-bromofuran (3.0 equiv.), Mg (3.0 equiv.), THF, 25 °C;<br>then <b>20</b> , 0 °C                                                                      | 68%                | 1.8:1.0         |
| 3     | 3-bromofuran (3.0 equiv.), <i>n</i> BuLi (3.0 equiv.), CuI (1.5 equiv.),<br>THF, -78 °C; then <b>20</b> , 0 °C                                        | 59%                | 2.0:1.0         |
| 4     | 3-furanboronic acid (6.0 equiv.), ZnEt <sub>2</sub> (18.0 equiv.), toluene<br>60 °C; then ( <i>R</i> )- <b>L2</b> (20 mol%), <b>20</b> , 0 °C - 25 °C | 41%                | 13:1.0          |
| 5     | 3-furanboronic acid (6.0 equiv.), ZnEt <sub>2</sub> (18.0 equiv.), toluene<br>60 °C; then ( <i>S</i> )- <b>L2</b> (20 mol%), <b>20</b> , 0 °C - 25 °C | 46%                | 1.0:8.1         |
| 6     | 3-furanboronic acid (6.0 equiv.), ZnEt <sub>2</sub> (18.0 equiv.), toluene<br>60 °C; then ( <i>R</i> )- <b>L3</b> (20 mol%), <b>20</b> , 0 °C - 25 °C | 55%                | 1.9:1.0         |
| 7     | (3-furyl)Ti(O <i>i</i> Pr) <sub>3</sub> (2.0 equiv.), toluene, 0 °C                                                                                   | 85%                | 5.3:1.0         |
| 8     | (3-furyl)Ti(O <i>i</i> Pr) <sub>3</sub> (2.0 equiv.), ( <i>R</i> )- <b>L4</b> (20 mol%), toluene,<br>0 °C                                             | 90%                | 15:1.0          |
| 9     | (3-furyl)Ti(O <i>i</i> Pr) <sub>3</sub> (2.0 equiv.), ( <i>S</i> )- <b>L4</b> (20 mol%), toluene,<br>0 °C                                             | 80%                | 2.2:1.0         |

<sup>a</sup> reaction conditions: **20** (0.019 mmol), 3-furyl nucleophile (x equiv.), Ligand (20 mol%), solvent. <sup>b</sup> Isolated yield. <sup>c</sup> The dr value was determined by crude <sup>1</sup>H NMR.

**Entry 8:** To a solution of (3-furyl)Ti(OiPr)<sub>3</sub><sup>6</sup> (11.1 mg, 0.038 mmol) and (*R*)-**L3** (1.0 mg, 20 mol%) in toluene (0.38 mL) was added aldehyde **20** (10.0 mg in 0.10 mL toluene, 0.019 mmol) dropwise at 0 °C. After stirring at this temperature for 2 h, the reaction mixture was quenched with NaOH (1.0 mL, aq., 1.0 M). The aqueous layer was extracted with EtOAc (2.0 mL × 3). The combined extracts were washed with brine, dried over Na<sub>2</sub>SO<sub>4</sub>, and concentrated under reduced pressure. The crude was purified by flash column chromatography (silica gel, petroleum ether: ethyl acetate = 30: 1) to afford **22** (9.6 mg, 90%, 15: 1 dr) as a white foam.

**22:** m.p. 79.6-80.2 °C; [ $\alpha$ ]<sub>D</sub><sup>25</sup> = +11.80 (*c* = 0.57, CHCl<sub>3</sub>); <sup>1</sup>H NMR (400 MHz, CDCl<sub>3</sub>)  $\delta$  7.45 (s, 1H), 7.424–7.420 (m, 1H), 6.41–6.40 (m, 1H), 5.41 (t, *J* = 8.4 Hz, 1H), 4.30 (br, 1H), 3.59 (dd, *J* = 10.4, 4.4 Hz, 1H), 3.48 (dd, *J* = 9.2, 4.4 Hz, 1H), 2.48–2.43 (m, 1H), 2.35–2.30 (m, 3H), 2.22–2.16 (m, 1H), 2.11–1.95 (m, 2H), 1.63–1.50 (m, 5H), 1.38 (d, *J* = 13.6 Hz, 1H), 1.21–1.16 (m, 1H), 1.02 (br, 3H), 0.89 (s, 9H), 0.87 (s, 9H), 0.05–0.04 (m, 12H); <sup>13</sup>C NMR (100 MHz, CDCl<sub>3</sub>)  $\delta$  179.5, 143.9, 139.5, 125.5, 108.2, 71.6, 66.9, 66.3, 50.3, 44.4, 40.0, 34.7, 33.2, 29.7, 28.1, 26.0, 25.8, 21.1, 18.3, 18.0, 16.4, -4.66, -4.70, -5.36, -5.40; **FT-IR** (neat):  $\nu_{\text{max}}$  = 2951, 2855, 1761, 1472, 1252, 1155, 1084, 833, 772 cm<sup>-1</sup>; **HRMS** (ESI): exact mass calculated for: C<sub>31</sub>H<sub>54</sub>O<sub>5</sub>NaSi<sub>2</sub> [M+Na]<sup>+</sup>: 585.3402, found: 585.3394.

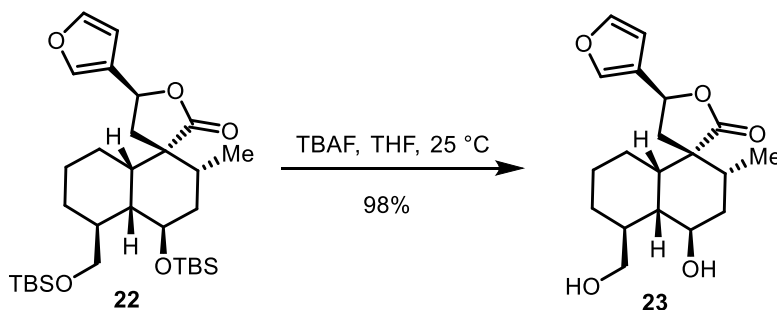

To a solution of **22** (128 mg, 0.23 mmol) in THF (9.1 ml) was added TBAF (0.68 mL, 0.68 mmol, 1.0 M in THF) dropwise at 25 °C. After stirring at this temperature for 12 h, the reaction mixture was quenched with NH<sub>4</sub>Cl (10 mL, aq., sat.). The aqueous layer was extracted with EtOAc (10 mL × 3). The combined extracts were washed with brine, dried over MgSO<sub>4</sub> and concentrated under reduced pressure. The residue was purified by flash column chromatography (silica gel, dichloromethane: methanol = 30: 1) to afford diol **23** (74.6 mg, 98% yield) as a white foam.

**23:** m.p. 72.0-73.5 °C; [ $\alpha$ ]<sub>D</sub><sup>24</sup> = +2.04 (*c* = 1.07, CHCl<sub>3</sub>); <sup>1</sup>H NMR (400 MHz, CDCl<sub>3</sub>)  $\delta$  7.47 (s, 1H), 7.43 (s, 1H), 6.41 (s, 1H), 5.41 (dd, *J* = 5.2, 3.6 Hz, 1H), 4.28 (d, *J* = 3.6 Hz, 1H), 3.70 (dd, *J* = 11.2, 4.8 Hz, 1H), 3.56 (dd, *J* = 11.2, 5.2 Hz, 1H), 2.49 (dd, *J* = 13.6, 7.6 Hz, 1H), 2.36–2.21 (m, 5H), 2.09–2.02 (m, 3H), 1.93–1.88 (m, 1H), 1.77 (dt, *J* = 9.2, 4.4 Hz, 1H), 1.69–1.64 (m, 1H), 1.61–1.49

(m, 3H), 1.38–1.30 (m, 1H), 1.07 (d,  $J = 6.8$  Hz, 3H);  $^{13}\text{C}$  NMR (100 MHz,  $\text{CDCl}_3$ )  $\delta$  179.1, 144.0, 139.7, 125.0, 108.2, 71.6, 66.0, 65.3, 50.4, 44.1, 44.0, 39.4, 35.0, 34.7, 33.2, 27.9, 27.8, 21.2, 16.4; **FT-IR** (neat):  $\nu_{\text{max}} = 3424, 2924, 1751, 1323, 1155, 1022, 874, 731$   $\text{cm}^{-1}$ ; **HRMS** (ESI): exact mass calculated for:  $\text{C}_{19}\text{H}_{26}\text{O}_5\text{Na}$   $[\text{M}+\text{Na}]^+$ : 357.1673, found: 357.1668.

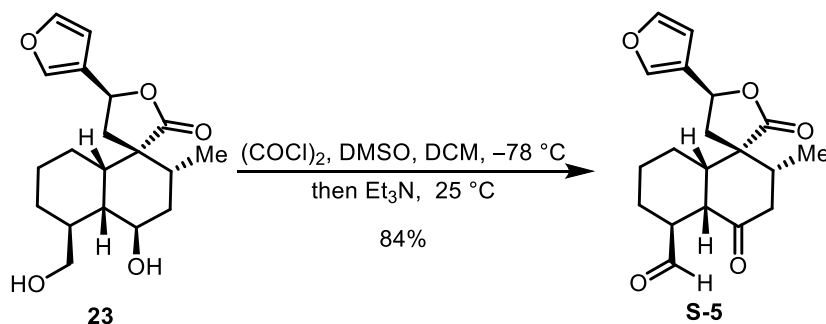

To a stirred solution of DCM (1.7 mL) and oxalyl chloride (34.7  $\mu\text{L}$ , 0.41 mmol) was added DMSO (58.3  $\mu\text{L}$ , 0.82 mmol) dropwise at  $-78$   $^\circ\text{C}$ . After stirring at this temperature for 10 min, the reaction mixture was added **23** (56.9 mg, 0.17 mmol) slowly and stirred at  $-78$   $^\circ\text{C}$  for another 30 min. Then  $\text{Et}_3\text{N}$  (284  $\mu\text{L}$ , 2.04 mmol) was added and the resulting mixture was stirred at  $-78$   $^\circ\text{C}$  for 5 min. After warming to  $25$   $^\circ\text{C}$  slowly and stirring at this temperature for 2 h, the reaction mixture was quenched with  $\text{NaHCO}_3$  (5.0 mL, aq., sat.). The aqueous layer was extracted with DCM (5.0 mL  $\times$  3). The combined extracts were washed with brine, dried over  $\text{Na}_2\text{SO}_4$ , and concentrated under reduced pressure. The residue was purified by flash column chromatography (silica gel, petroleum ether: ethyl acetate = 4: 1) to afford ketoaldehyde **S-5** (47.2 mg, 84% yield) as a white foam.

**S-5**: m.p. 59.0-60.5  $^\circ\text{C}$ ;  $[\alpha]_{\text{D}}^{24} = -195.65$  ( $c = 0.96$ ,  $\text{CHCl}_3$ );  $^1\text{H}$  NMR (400 MHz,  $\text{CDCl}_3$ )  $\delta$  9.69 (s, 1H), 7.50 (s, 1H), 7.44 (t,  $J = 1.6$  Hz, 1H), 6.42 (d,  $J = 1.6$  Hz, 1H), 5.38 (dd,  $J = 10.8, 5.6$  Hz, 1H), 3.33 (d,  $J = 4.4$  Hz, 2H), 2.84 (dd,  $J = 18.4, 13.2$  Hz, 1H), 2.56 (dd,  $J = 12.8, 5.6$  Hz, 1H), 2.41–2.31 (m, 2H), 2.25–2.16 (m, 2H), 2.07 (d,  $J = 13.6$  Hz, 1H), 1.77–1.64 (m, 2H), 1.60–1.56 (m, 1H), 1.31–1.20 (m, 1H), 1.14 (d,  $J = 6.8$  Hz, 3H), 1.08 (dt,  $J = 12.8, 3.6$  Hz, 1H);  $^{13}\text{C}$  NMR (100 MHz,  $\text{CDCl}_3$ )  $\delta$  210.7, 204.6, 175.8, 144.0, 140.0, 123.4, 108.2, 71.1, 51.0, 46.1, 44.5, 43.9, 42.8, 40.3, 32.5, 30.2, 23.7, 21.2, 15.5; **FT-IR** (neat):  $\nu_{\text{max}} = 2955, 2919, 1758, 1704, 1504, 1457, 1146, 1021, 871, 751, 725$   $\text{cm}^{-1}$ ; **HRMS** (ESI): exact mass calculated for:  $\text{C}_{19}\text{H}_{22}\text{O}_5\text{Na}$   $[\text{M}+\text{Na}]^+$ : 353.1359, found: 353.1356.

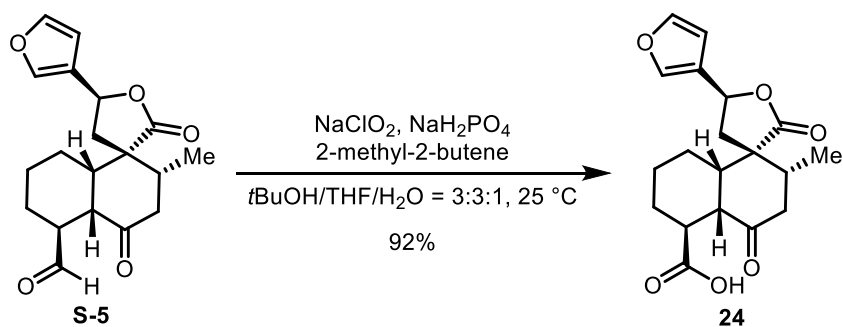

To a solution of ketoaldehyde **S-5** (20.4 mg, 0.062 mmol) and  $\text{NaH}_2\text{PO}_4$  (26.6 mg, 0.222 mmol) in  $t\text{BuOH/THF/H}_2\text{O}$  (v:v:v = 3:3:1, 2.1 mL) was added 2-methyl-2-butene (98  $\mu\text{L}$ , 1.167 mmol) and  $\text{NaClO}_2$  (26.8 mg, 0.296 mmol) sequentially at 25 °C. After stirring at this temperature for 1 h, the reaction mixture was diluted with  $\text{NH}_4\text{Cl}$  (2.0 mL, aq., sat.). The mixture was extracted with EtOAc (2.0 mL  $\times$  3). The combined extracts were washed with brine, dried over  $\text{Na}_2\text{SO}_4$  and concentrated under reduced pressure. The residue was purified by flash column chromatography (silica gel, dichloromethane: methanol = 30: 1) to afford carboxylic acid **24** (19.6 mg, 92% yield) as a white solid.

**24**: m.p. 141.1-142.3 °C;  $[\alpha]_D^{21} = -80.21$  ( $c = 0.19$ , acetone);  $^1\text{H NMR}$  (400 MHz, acetone- $d_6$ )  $\delta$  7.76 (s, 1H), 7.62 (s, 1H), 6.62 (s, 1H), 5.65 (dd,  $J = 10.0, 6.0$  Hz, 1H), 3.42–3.35 (m, 2H), 2.71 (dd,  $J = 18.0, 13.2$  Hz, 1H), 2.56–2.47 (m, 3H), 2.44–2.36 (m, 1H), 2.29 (dd,  $J = 18.0, 3.8$  Hz, 1H), 1.98 (d,  $J = 12.8$  Hz, 1H), 1.64–1.57 (m, 2H), 1.50–1.38 (m, 2H), 1.29–1.21 (m, 1H), 1.13 (d,  $J = 6.8$  Hz, 3H);  $^{13}\text{C NMR}$  (100 MHz, acetone- $d_6$ )  $\delta$  210.5, 176.7, 175.8, 145.1, 141.9, 125.0, 109.6, 71.5, 52.0, 47.7, 45.0, 43.5, 41.3, 38.9, 33.2, 31.2, 24.0, 23.9, 15.9; **FT-IR** (neat):  $\nu_{\text{max}} = 2939, 1763, 1712, 1676, 1203, 1164, 1145, 1009, 939, 876, 600$   $\text{cm}^{-1}$ ; **HRMS** (ESI): exact mass calculated for:  $\text{C}_{19}\text{H}_{22}\text{O}_6\text{Na}$   $[\text{M}+\text{Na}]^+$ : 369.1309, found: 369.1300.

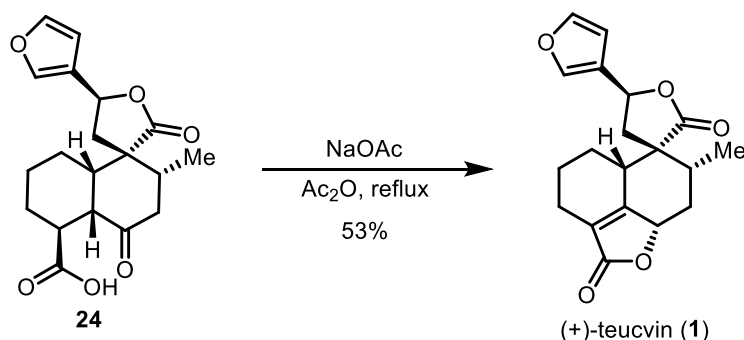

To a solution of **24** (16.0 mg, 0.046 mmol) in  $\text{Ac}_2\text{O}$  (0.35 mL) was added  $\text{NaOAc}$  (1.9 mg, 0.023 mmol) at 25 °C. The reaction mixture was stirred at 150 °C for 15 h. After cooling to 25 °C, the mixture was diluted with EtOAc (5.0 mL). The organic layer was washed with  $\text{NaHCO}_3$  (5.0 mL, aq., sat.), dried over  $\text{Na}_2\text{SO}_4$ , and concentrated under reduced pressure. The residue was purified by column

chromatography (silica gel, petroleum ether: ethyl acetate = 1: 1) to afford (+)-teucvin (**1**) (8.0 mg, 53%) as a white solid.

(+)-Teucvin (**1**): m.p. 199.5-201.4 °C;  $[\alpha]_{\text{D}}^{23} = +177.46$  ( $c = 1.05$ ,  $\text{CHCl}_3$ ); **<sup>1</sup>H NMR** (400 MHz,  $\text{CDCl}_3$ )  $\delta$  7.45 (s, 1H), 7.44 (s, 1H), 6.38 (s, 1H), 5.44 (t,  $J = 8.4$  Hz, 1H), 4.76 (t,  $J = 8.8$  Hz, 1H), 2.69 (br, 1H), 2.55 (d,  $J = 8.8$  Hz, 2H), 2.28–2.08 (m, 5H), 2.01–1.98 (m, 1H), 1.93–1.86 (m, 1H), 1.58–1.39 (m, 2H), 1.05 (d,  $J = 6.8$  Hz, 3H); **<sup>13</sup>C NMR** (100 MHz,  $\text{CDCl}_3$ )  $\delta$  175.5, 172.9, 161.3, 144.3, 139.5, 126.6, 124.9, 107.9, 78.2, 71.7, 53.5, 42.1, 40.9, 36.0, 35.2, 24.8, 21.7, 19.6, 17.0; **FT-IR** (neat):  $\nu_{\text{max}} = 2934, 1744, 1694, 1350, 1207, 1020, 966, 874, 741$   $\text{cm}^{-1}$ ; **HRMS** (EI): exact mass calculated for:  $\text{C}_{19}\text{H}_{20}\text{O}_5$   $[\text{M}]^+$ : 328.1305, found: 328.1303. The spectroscopic data were identical with those reported in the literature.<sup>7</sup>



## 5. Total Synthesis of (+)-Cracrosone A and (+)-Cracrosone E

**Table S2** The Allylic Oxidation of (+)-Teucvin

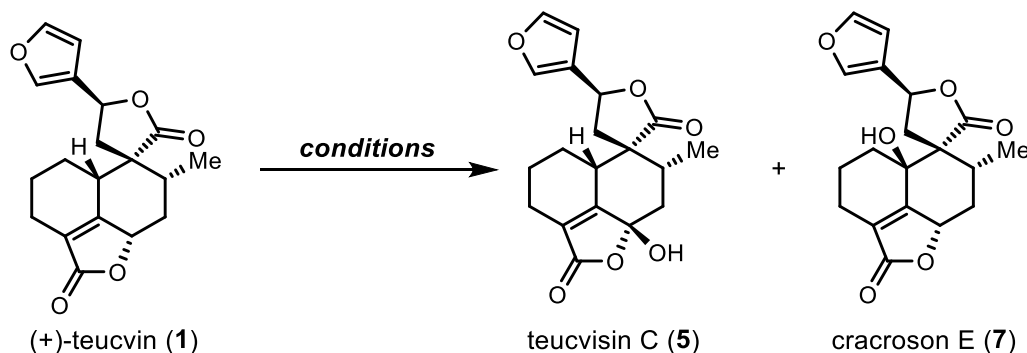

| Entry | Conditions <sup>a</sup>                                                               | Result            |
|-------|---------------------------------------------------------------------------------------|-------------------|
| 1     | SeO <sub>2</sub> (4.0 equiv.), DMSO, 120 °C                                           | 7, trace          |
| 2     | SeO <sub>2</sub> (10.0 equiv.), 1,4-dioxane/ formic acid, 80 °C                       | decomposed        |
| 3     | SeO <sub>2</sub> (5.0 equiv.), benzene, reflux                                        | 5, 4%; 7, 9%      |
| 4     | SeO <sub>2</sub> (0.5 equiv.), TBHP (2.5 equiv.), DCM, 25 °C                          | N.R. <sup>b</sup> |
| 5     | CrO <sub>3</sub> (1.0 equiv.), TBHP (10 equiv.), pyridine (2.0 equiv.),<br>DCM, 40 °C | 7, trace          |

<sup>a</sup> Reaction conditions: teucvin (1) (0.01 mmol), oxidant, solvent. <sup>b</sup> N.R. = No reaction. TBHP, *tert*-butyl hydroperoxide.

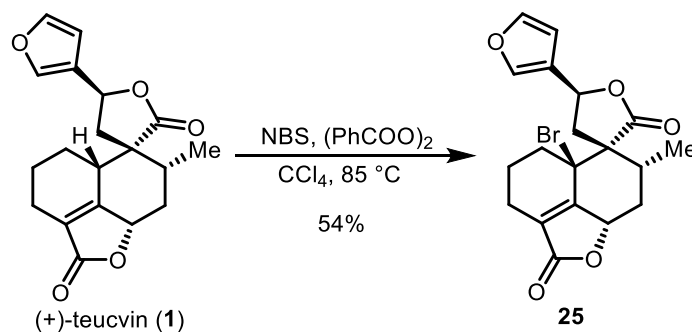

To a mixture of (+)-teucvin (1) (24.3 mg, 0.074 mmol) and NBS (15.8 mg, 0.089 mmol) in CCl<sub>4</sub> (7.4 mL) was added dibenzoylperoxide [1.8 mg in 300 μL CCl<sub>4</sub>, 10 mol%, (degassed by freeze-pump-thaw cycles for three times)]. After stirring at 85 °C for 20 h, the reaction mixture was concentrated under reduced pressure. The residue was purified by flash column chromatography (silica gel, petroleum ether: ethyl acetate = 3: 1) to afford bromide **25** (16.3 mg, 54%) as a white solid.

**25**: m.p. 174.5-175.5 °C; [α]<sub>D</sub><sup>24</sup> = +61.06 (*c* = 0.40, CHCl<sub>3</sub>); <sup>1</sup>H NMR (400 MHz, CDCl<sub>3</sub>) δ 7.47 (d, *J* = 4.2 Hz, 2H), 6.40 (s, 1H), 5.50 (t, *J* = 8.4 Hz, 1H), 5.21–5.15 (m, 1H), 3.32 (dd, *J* = 14.8, 8.8 Hz, 1H), 2.62–2.58 (m, 1H), 2.54–2.45 (m, 2H), 2.43–2.35 (m, 1H), 2.26–2.17 (m, 3H), 2.05–1.93 (m, 3H),

1.03 (d,  $J = 6.8$  Hz, 3H);  $^{13}\text{C}$  NMR (100 MHz,  $\text{CDCl}_3$ )  $\delta$  172.5, 171.9, 160.0, 144.3, 139.5, 126.2, 124.6, 107.9, 76.4, 71.6, 66.4, 59.9, 39.6, 36.3, 34.8, 34.6, 19.6, 19.3, 17.3. FT-IR (neat):  $\nu_{\text{max}} = 2928, 2859, 1755, 1462, 1159, 1045, 874, 791, 745, 602$   $\text{cm}^{-1}$ ; HRMS (ESI): exact mass calculated for:  $\text{C}_{19}\text{H}_{19}\text{O}_5\text{NaBr}$   $[\text{M}+\text{Na}]^+$ : 429.0308, found: 429.0304.

**Table 2.** Investigations of the Hydrolysis Reaction of Allylic Bromide **25**.<sup>a</sup>

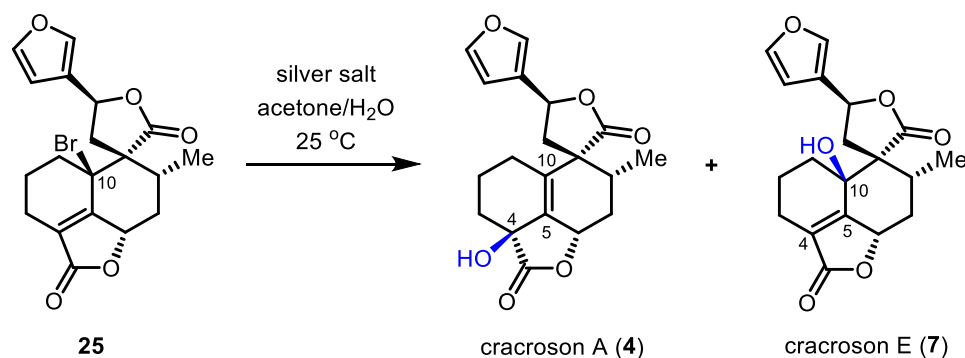

| Entry | silver salt                     | cracrosone A <sup>b</sup> | cracrosone E <sup>b</sup> | ratio |
|-------|---------------------------------|---------------------------|---------------------------|-------|
| 1     | AgOTf                           | 66%                       | 28%                       | 2.4:1 |
| 2     | AgNTf <sub>2</sub>              | 49%                       | 33%                       | 1.5:1 |
| 3     | AgSbF <sub>6</sub>              | 47%                       | 15%                       | 3.1:1 |
| 4     | AgBF <sub>4</sub>               | 76%                       | 21%                       | 3.6:1 |
| 5     | AgClO <sub>4</sub>              | 70%                       | 17%                       | 4.1:1 |
| 6     | AgNO <sub>3</sub>               | 23%                       | 54%                       | 1:2.3 |
| 7     | Ag <sub>2</sub> CO <sub>3</sub> | trace                     | trace                     | --    |

<sup>a</sup> Reaction conditions: **25** (0.01 mmol), silver salt (0.03 mmol), acetone/H<sub>2</sub>O (v/v = 9:1, 0.7 mL) at 25 °C. <sup>b</sup> Isolated yield.

**Entry 4:** To a solution of bromide **25** (4.2 mg, 0.01 mmol) in acetone/H<sub>2</sub>O (v/v = 9:1, 0.7 mL) was added AgBF<sub>4</sub> (6.0 mg, 0.03 mmol) at 25 °C. After stirring at this temperature for 3 h, the reaction mixture was diluted with EtOAc (2.0 mL). The resulting mixture was washed with H<sub>2</sub>O (2.0 mL) and brine (2.0 mL), dried over Na<sub>2</sub>SO<sub>4</sub> and concentrated under reduced pressure. The residue was purified by column chromatography (silica gel, dichloromethane: diethyl ether = 2: 1) giving (+)-cracrosone A (**4**) (2.7 mg, 76%) and (+)-cracrosone E (**7**) (0.8 mg, 21%) as a white solid.

**Entry 6:** To a solution of bromide **25** (4.1 mg, 0.01 mmol) in acetone/H<sub>2</sub>O (v/v = 9:1, 0.7 mL) was added AgNO<sub>3</sub> (5.3 mg, 0.03 mmol) at 25 °C. After stirring at this temperature for 24 h, the reaction mixture was diluted with EtOAc (2.0 mL). The resulting mixture was washed with H<sub>2</sub>O (2.0 mL) and brine (2.0 mL), dried over Na<sub>2</sub>SO<sub>4</sub> and concentrated under reduced pressure. The residue was purified

by column chromatography (silica gel, dichloromethane: diethyl ether = 2: 1) giving (+)-cracrosone A (**4**) (0.8 mg, 23%) and (+)-cracrosone E (**7**) (1.9 mg, 54%) as a white solid.

(+)-Cracrosone A (**4**): m.p. 231.6-233.0 °C;  $[\alpha]_D^{28} = +25.35$  ( $c = 0.43$ , MeOH); **<sup>1</sup>H NMR** (400 MHz, CDCl<sub>3</sub>)  $\delta$  7.50 (s, 1H), 7.47 (s, 1H), 6.42 (s, 1H), 5.50 (t,  $J = 8.8$  Hz, 1H), 5.14 (t,  $J = 8.0$  Hz, 1H), 2.74 (dd,  $J = 14.0, 8.4$  Hz, 1H), 2.59 (br s, 1H), 2.41–2.37 (m, 1H), 2.30 (dd,  $J = 14.0, 9.2$  Hz, 1H), 2.19–1.95 (m, 6H), 1.87–1.78 (m, 1H), 1.53–1.46 (m, 1H), 1.14 (d,  $J = 7.2$  Hz, 3H); **<sup>13</sup>C NMR** (100 MHz, CDCl<sub>3</sub>)  $\delta$  176.0, 175.9, 144.3, 139.7, 137.4, 132.8, 124.4, 108.0, 76.9, 72.5, 69.1, 52.5, 39.5, 34.9, 32.5, 29.8, 24.9, 17.2, 16.1; **FT-IR** (neat):  $\nu_{\max} = 3472, 2943, 1755, 1335, 1169, 1146, 974, 947, 874, 741, 604$  cm<sup>-1</sup>; **HRMS** (ESI): exact mass calculated for: C<sub>19</sub>H<sub>20</sub>O<sub>6</sub>Na [M+Na]<sup>+</sup>: 367.1152, found: 367.1147. The spectroscopic data were identical with those reported in the literature.<sup>11</sup>

(+)-Cracrosone E (**7**): m.p. 187.6-189.1 °C;  $[\alpha]_D^{23} = +95.79$  ( $c = 0.20$ , MeOH); **<sup>1</sup>H NMR** (400 MHz, CDCl<sub>3</sub>)  $\delta$  7.46–7.45 (m, 2H), 6.40 (s, 1H), 5.44 (t,  $J = 8.4$  Hz, 1H), 5.09–5.03 (m, 1H), 3.23 (dd,  $J = 14.8, 8.8$  Hz, 1H), 2.59 (br, 1H), 2.35–2.29 (m, 1H), 2.27–2.17 (m, 4H), 2.14–2.03 (m, 2H), 1.98–1.93 (m, 1H), 1.76–1.62 (m, 2H), 1.02 (d,  $J = 6.0$  Hz, 3H); **<sup>13</sup>C NMR** (100 MHz, CDCl<sub>3</sub>)  $\delta$  175.5, 172.8, 160.9, 144.2, 139.5, 128.6, 125.0, 108.0, 77.1, 72.2, 69.4, 58.9, 35.3, 34.8, 33.8, 32.5, 20.0, 19.4, 17.2; **FT-IR** (neat):  $\nu_{\max} = 3397, 2926, 1746, 1215, 1175, 1018, 951, 802, 658$  cm<sup>-1</sup>; **HRMS** (ESI): exact mass calculated for: C<sub>19</sub>H<sub>20</sub>O<sub>6</sub>Na [M+Na]<sup>+</sup>: 367.1152, found: 367.1147. The spectroscopic data were identical with those reported in the literature.<sup>15</sup>

## 6. Total Synthesis of (+)-Montanin A and (+)-Teucvisin C

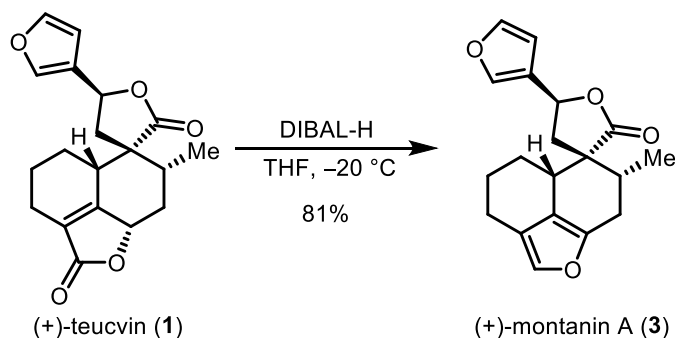

To a solution of (+)-teucvin (**1**) (5.7 mg, 0.017 mmol) in THF (0.43 mL) was added DIBAL-H (52  $\mu\text{L}$ , 0.052 mmol, 1.0 M in hexane) dropwise at  $-20\text{ }^\circ\text{C}$ . After stirring at this temperature for 30 min, the reaction was quenched with HCl (50  $\mu\text{L}$ , aq., 2.0 M) slowly to adjust the pH value to 1~2. Then the resulting mixture was allowed to warm to  $25\text{ }^\circ\text{C}$  and extracted with EtOAc (2.0 mL  $\times$  3). The combined extracts were washed with brine, dried over  $\text{Na}_2\text{SO}_4$ , and concentrated under reduced pressure. The residue was purified by flash chromatography column (silica gel, petroleum ether: ethyl acetate = 4: 1) to afford (+)-montanin A (**3**) (4.4 mg, 81%) as a white solid.

(+)-Montanin A (**3**): m.p.  $126.1\text{--}127.7\text{ }^\circ\text{C}$ ;  $[\alpha]_D^{16} = +103.26$  ( $c = 0.31$ ,  $\text{CHCl}_3$ );  **$^1\text{H NMR}$**  (400 MHz,  $\text{CDCl}_3$ )  $\delta$  7.47 (s, 1H), 7.44 (t,  $J = 2.0$  Hz, 1H), 7.06 (s, 1H), 6.41 (br, 1H), 5.44 (t,  $J = 8.4$  Hz, 1H), 2.88–2.75 (m, 3H), 2.69 (dd,  $J = 16.4, 6.0$  Hz, 1H), 2.62 (dd,  $J = 13.6, 8.8$  Hz, 1H), 2.52–2.39 (m, 2H), 2.31–2.21 (m, 1H), 2.15–2.05 (m, 2H), 1.71–1.58 (m, 1H), 1.30–1.24 (m, 1H), 1.15 (d,  $J = 6.8$  Hz, 3H);  **$^{13}\text{C NMR}$**  (100 MHz,  $\text{CDCl}_3$ )  $\delta$  175.5, 147.9, 144.1, 139.6, 136.2, 125.5, 119.7, 116.9, 108.1, 71.6, 50.7, 43.2, 39.7, 36.1, 30.0, 25.6, 23.9, 19.1, 17.8; **FT-IR** (neat):  $\nu_{\text{max}} = 2963, 1748, 1175, 1152, 1013, 874, 806, 727, 600\text{ cm}^{-1}$ ; **HRMS** (ESI): exact mass calculated for:  $\text{C}_{19}\text{H}_{20}\text{O}_4\text{Na}$   $[\text{M}+\text{Na}]^+$ : 335.1254, found: 335.1252. The spectroscopic data were identical with those reported in the literature.<sup>9,10</sup>

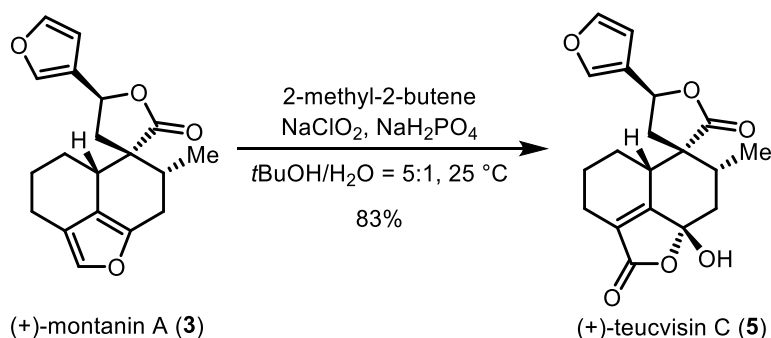

To a solution of (+)-montanin A (**3**) (9.6 mg, 0.031 mmol) in  $t\text{BuOH}/\text{H}_2\text{O}$  ( $v:v = 5:1$ , 1.0 mL) was added  $\text{NaH}_2\text{PO}_4$  (7.4 mg, 0.061 mmol), 2-methyl-2-butene (25.8  $\mu\text{L}$ , 0.307 mmol), and  $\text{NaClO}_2$  (8.9

mg, 0.098 mmol) sequentially at 25 °C. After stirring at this temperature for 2 h, the reaction mixture was diluted with H<sub>2</sub>O (3.0 mL). The resulting mixture was extracted with EtOAc (3.0 mL × 3). The combined extracts were washed with brine, dried over Na<sub>2</sub>SO<sub>4</sub>, and concentrated under reduced pressure. The residue was purified by column chromatography (silica gel, petroleum ether: ethyl acetate = 1: 2) to afford (+)-teucvisin C (**5**) (8.8 mg, 83%) as a white solid.

(+)-Teucvisin C (**5**): m.p. 212.3-213.5 °C; [ $\alpha$ ]<sub>D</sub><sup>23</sup> = +176.92 (*c* = 0.10, MeOH); <sup>1</sup>H NMR (400 MHz, CDCl<sub>3</sub>)  $\delta$  7.46 (s, 1H), 7.45 (t, *J* = 1.6 Hz, 1H), 6.40 (s, 1H), 5.45 (t, *J* = 8.4 Hz, 1H), 3.71 (br s, 1H), 2.87–2.82 (m, 1H), 2.59–2.53 (m, 2H), 2.47 (t, *J* = 12.4 Hz, 1H), 2.27–2.09 (m, 5H), 2.01–1.96 (m, 1H), 1.60–1.41 (m, 2H), 1.04 (d, *J* = 6.4 Hz, 3H); <sup>13</sup>C NMR (100 MHz, CDCl<sub>3</sub>)  $\delta$  175.8, 170.8, 159.8, 144.3, 139.6, 128.4, 124.8, 108.0, 102.2, 72.0, 54.0, 40.6, 40.2, 39.8, 35.8, 24.5, 21.4, 19.4, 16.6; FT-IR (neat):  $\nu_{\max}$  = 3360, 2949, 1757, 1717, 1236, 1155, 1090, 907, 847, 737 cm<sup>-1</sup>; HRMS (ESI): exact mass calculated for: C<sub>19</sub>H<sub>20</sub>O<sub>6</sub>Na [M+Na]<sup>+</sup>: 367.1152, found: 367.1143. The spectroscopic data were identical with those reported in the literature.<sup>12</sup>

## 7. Total Synthesis of (+)-Teucrin A

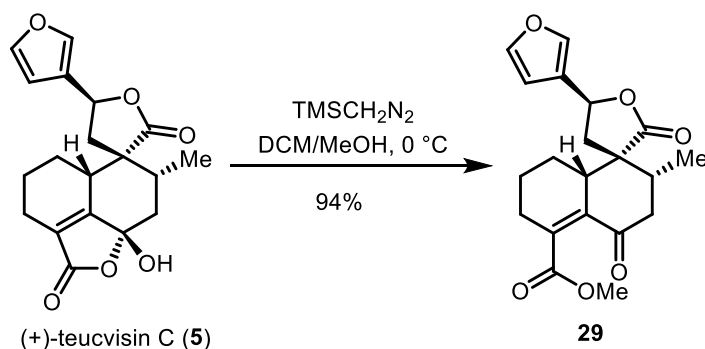

To a solution of (+)-teucvisin C (**6**) (30.5 mg, 0.089 mmol) in DCM (11 mL) and MeOH (3.7 mL) was added TMSCH<sub>2</sub>N<sub>2</sub> (0.71 mL, 1.42 mmol, 2.0 M in hexane) at 0 °C. After stirring at this temperature for 2 h, the reaction mixture was quenched with AcOH (0.1 mL) until no bubbles emerged. The resulting mixture was washed with H<sub>2</sub>O and brine, dried over Na<sub>2</sub>SO<sub>4</sub>, and concentrated under reduced pressure. The residue was purified by flash chromatography column (silica gel, petroleum ether: ethyl acetate = 1: 1) to afford **29** (29.8 mg, 94%) as a white solid.

**29**: m.p. 155.5-156.8 °C; [ $\alpha$ ]<sub>D</sub><sup>26</sup> = +184.09 (*c* = 0.69, CHCl<sub>3</sub>); <sup>1</sup>H NMR (400 MHz, CDCl<sub>3</sub>)  $\delta$  7.48 (s, 1H), 7.45 (t, *J* = 1.6 Hz, 1H), 6.41–6.40 (m, 1H), 5.46 (t, *J* = 8.4 Hz, 1H), 3.72 (s, 3H), 3.13 (dd, *J* = 16.4, 12.8 Hz, 1H), 2.68–2.63 (m, 1H), 2.59–2.45 (m, 4H), 2.31–2.21 (m, 2H), 2.19–2.09 (m, 1H), 2.02–1.96 (m, 1H), 1.62–1.51 (m, 1H), 1.46–1.40 (m, 1H), 1.10 (d, *J* = 6.8 Hz, 3H); <sup>13</sup>C NMR (100 MHz, CDCl<sub>3</sub>)  $\delta$  199.9, 175.9, 170.3, 144.3, 139.6, 138.8, 137.3, 124.9, 108.0, 72.0, 52.4, 52.2, 46.0, 44.3, 39.4, 37.0, 27.1, 25.1, 21.0, 17.8; FT-IR (neat):  $\nu_{\max}$  = 2947, 1746, 1721, 1697, 1223, 1074, 1018,

943, 874, 808, 601  $\text{cm}^{-1}$ ; **HRMS** (ESI): exact mass calculated for:  $\text{C}_{20}\text{H}_{22}\text{O}_6\text{Na}$   $[\text{M}+\text{Na}]^+$ : 381.1039, found: 381.1309.

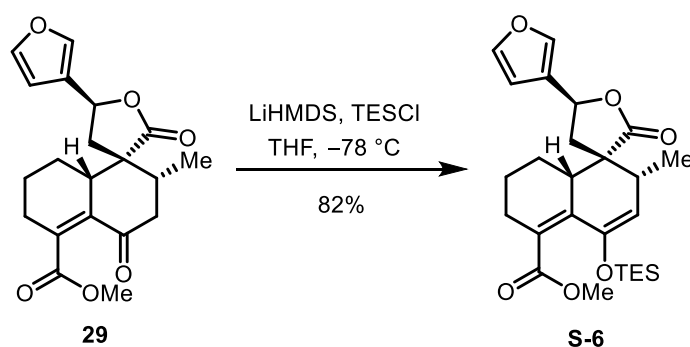

To a solution of **29** (21.1 mg, 0.059 mmol) in THF (1.2 mL) was added LiHMDS (68  $\mu\text{L}$ , 0.088 mmol, 1.3 M in THF) dropwise at  $-78\text{ }^\circ\text{C}$ . After stirring at this temperature for 50 min, the reaction mixture was added TESCi (11.8  $\mu\text{L}$ , 0.071 mmol) and stirred for another 30 min. The reaction mixture was quenched with  $\text{NaHCO}_3$  (1.0 mL, aq., sat.). The resulting mixture was extracted with EtOAc (5.0 mL  $\times$  3). The combined extracts were washed with brine, dried over  $\text{Na}_2\text{SO}_4$ , and concentrated under reduced pressure. The residue was purified by flash chromatography column (silica gel, petroleum ether: ethyl acetate = 4: 1) to afford enol ether **S-6** (22.8 mg, 82%) as a colorless oil.

**S-6**:  $[\alpha]_{\text{D}}^{26} = +89.01$  ( $c = 0.89$ ,  $\text{CHCl}_3$ );  **$^1\text{H NMR}$**  (400 MHz,  $\text{CDCl}_3$ )  $\delta$  7.47 (s, 1H), 7.44 (s, 1H), 6.41 (s, 1H), 5.34 (t,  $J = 8.4$  Hz, 1H), 4.78 (d,  $J = 2.0$  Hz, 1H), 3.73 (s, 3H), 2.60–2.51 (m, 3H), 2.43 (dd,  $J = 18.0, 4.4$  Hz, 1H), 2.35–2.25 (m, 2H), 2.24–2.17 (m, 1H), 1.99–1.95 (m, 1H), 1.57–1.46 (m, 1H), 1.38–1.28 (m, 1H), 1.12 (d,  $J = 7.2$  Hz, 3H), 0.97 (t,  $J = 8.0$  Hz, 9H), 0.74–0.67 (m, 6H);  **$^{13}\text{C NMR}$**  (100 MHz,  $\text{CDCl}_3$ )  $\delta$  174.6, 172.7, 146.5, 144.1, 139.6, 129.9, 129.0, 125.3, 110.1, 108.1, 71.2, 52.0, 51.9, 43.8, 40.7, 38.0, 28.6, 25.6, 21.6, 16.7, 6.7, 4.6; **FT-IR** (neat):  $\nu_{\text{max}} = 2953, 2876, 1765, 1719, 1229, 1163, 1142, 1016, 806, 725\text{ cm}^{-1}$ ; **HRMS** (ESI): exact mass calculated for:  $\text{C}_{26}\text{H}_{36}\text{O}_6\text{NaSi}$   $[\text{M}+\text{Na}]^+$ : 495.2173, found: 495.2177.

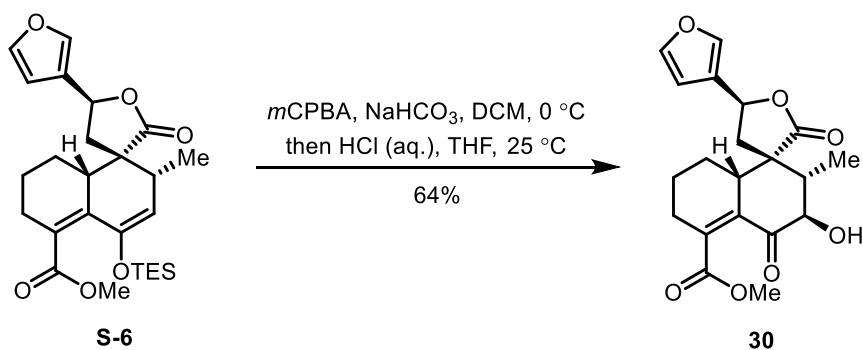

To a solution of **S-6** (11.3 mg, 0.024 mmol) in DCM (0.96 mL) was added NaHCO<sub>3</sub> (3.0 mg, 0.036 mmol) and *m*CPBA (7.3 mg, 0.036 mmol, 85% w/w) at 0 °C. After stirring at this temperature for 1 h, the reaction mixture was quenched with Na<sub>2</sub>SO<sub>3</sub> (1.0 mL, aq., sat.). The resulting mixture was extracted with EtOAc (2.0 mL × 3). The combined extracts were washed with brine, dried over Na<sub>2</sub>SO<sub>4</sub>, and concentrated under reduced pressure. The residue was used in the next step without further purification.

To a solution of the above residue in THF (0.96 mL) was added HCl (190 μL, aq., 1.0 M) at 25 °C. After stirring at this temperature for 1 h, the reaction mixture was quenched with NaHCO<sub>3</sub> (1.0 mL, aq., sat.). The resulting mixture was extracted with EtOAc (2.0 mL × 3). The combined extracts were washed with brine, dried over Na<sub>2</sub>SO<sub>4</sub>, and concentrated under reduced pressure. The residue was purified by flash chromatography column (silica gel, petroleum ether: ethyl acetate = 1: 1) to afford **30** (5.8 mg, 64%) as a white solid.

**30**: m.p. 170.3-171.8 °C; [ $\alpha$ ]<sub>D</sub><sup>27</sup> = +193.40 (*c* = 0.37, CHCl<sub>3</sub>); <sup>1</sup>H NMR (400 MHz, CDCl<sub>3</sub>) δ 7.49 (s, 1H), 7.47 (t, *J* = 1.6 Hz, 1H), 6.43 (s, 1H), 5.48 (t, *J* = 8.4 Hz, 1H), 4.89 (dd, *J* = 11.2, 3.6 Hz, 1H), 3.68 (s, 3H), 3.56 (d, *J* = 3.6 Hz, 1H), 2.72–2.60 (m, 2H), 2.60–2.49 (m, 2H), 2.25–2.15 (m, 2H), 2.00–1.96 (m, 1H), 1.89–1.81 (m, 1H), 1.57–1.42 (m, 2H), 1.30 (d, *J* = 6.4 Hz, 3H); <sup>13</sup>C NMR (100 MHz, CDCl<sub>3</sub>) δ 203.6, 176.1, 168.0, 144.4, 140.3, 139.7, 136.8, 124.7, 107.9, 75.7, 72.6, 54.0, 52.4, 47.0, 45.9, 39.6, 26.1, 25.0, 20.7, 14.4; FT-IR (neat): ν<sub>max</sub> = 3470, 2920, 1738, 1697, 1279, 1254, 1163, 1018, 991, 872, 793 cm<sup>-1</sup>; HRMS (ESI): exact mass calculated for: C<sub>20</sub>H<sub>22</sub>O<sub>7</sub>Na [M+Na]<sup>+</sup>: 397.1258, found: 397.1257.

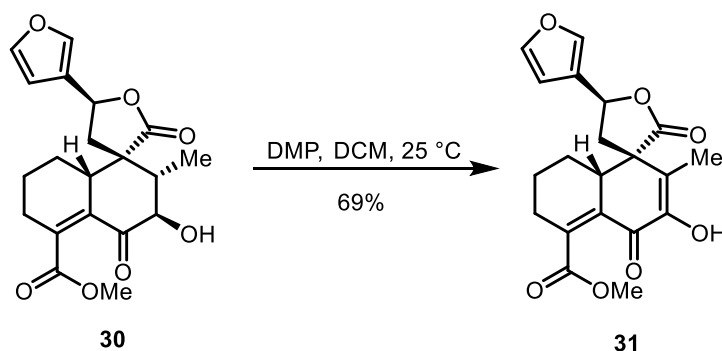

To a solution of **30** (14.8 mg, 0.04 mmol) in DCM (0.8 mL) was added Dess–Martin periodinane (25.1 mg, 0.06 mmol) at 25 °C. After stirring at this temperature for 1 h, the reaction mixture was quenched with Na<sub>2</sub>S<sub>2</sub>O<sub>3</sub> (0.5 mL, aq., sat.) and NaHCO<sub>3</sub> (0.5 mL, aq., sat.). The resulting mixture was extracted with EtOAc (2.0 mL × 3). The combined extracts were washed with brine, dried over Na<sub>2</sub>SO<sub>4</sub>, and concentrated under reduced pressure. The residue was purified by flash chromatography column (silica gel, petroleum ether: ethyl acetate = 1: 1) to afford **31** (10.1 mg, 69%) as a white solid.

**31**: m.p. 64.4-65.2 °C;  $[\alpha]_D^{32} = -50.27$  ( $c = 0.37$ ,  $\text{CHCl}_3$ );  $^1\text{H NMR}$  (400 MHz,  $\text{CDCl}_3$ )  $\delta$  7.52 (s, 1H), 7.49 (t,  $J = 1.2$  Hz, 1H), 6.55 (s, 1H), 6.44 (s, 1H), 5.53 (t,  $J = 8.4$  Hz, 1H), 3.81 (s, 3H), 2.95–2.85 (m, 2H), 2.61 (dd,  $J = 14.4, 8.4$  Hz, 1H), 2.57–2.51 (m, 1H), 2.42–2.32 (m, 1H), 2.27–2.24 (m, 1H), 2.07–2.02 (m, 1H), 1.91 (s, 3H), 1.67–1.45 (m, 3H);  $^{13}\text{C NMR}$  (100 MHz,  $\text{CDCl}_3$ )  $\delta$  180.1, 174.8, 171.0, 146.8, 144.5, 143.5, 139.8, 128.3, 126.9, 124.8, 107.9, 72.5, 54.3, 52.6, 44.1, 38.8, 28.0, 24.8, 20.6, 14.5; **FT-IR** (neat):  $\nu_{\text{max}} = 3393, 2951, 1761, 1724, 1653, 1614, 1281, 1253, 1159, 873, 729$   $\text{cm}^{-1}$ ; **HRMS** (ESI): exact mass calculated for:  $\text{C}_{20}\text{H}_{20}\text{O}_7\text{Na}$   $[\text{M}+\text{Na}]^+$ : 395.1101, found: 395.1105.

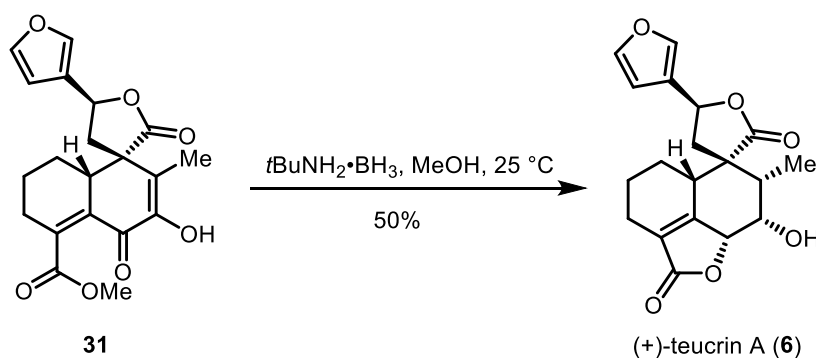

To a solution of **31** (3.8 mg, 0.010 mmol) in MeOH (0.2 mL) was added  $t\text{BuNH}_2 \cdot \text{BH}_3$  (2.6 mg, 0.031 mmol) at 25 °C. After stirring at this temperature for 10 h, the reaction mixture was quenched with HCl (20  $\mu\text{L}$ , aq., 2.0 M). The resulting mixture was extracted with EtOAc (1.0 mL  $\times$  3). The combined extracts were washed with brine, dried over  $\text{Na}_2\text{SO}_4$ , and concentrated under reduced pressure. The residue was purified by flash column chromatography (silica gel, dichloromethane: acetone = 5: 1) to afford (+)-teucrin A (**6**) (1.7 mg, 50%) as a white solid.

(+)-Teucrin A (**6**): m.p. 222.0-222.9 °C;  $[\alpha]_D^{32} = +91.03$  ( $c = 0.11$ ,  $\text{CHCl}_3$ );  $^1\text{H NMR}$  (400 MHz,  $\text{DMSO-d}_6$ )  $\delta$  7.90 (s, 1H), 7.75 (s, 1H), 6.59 (d,  $J = 0.8$  Hz, 1H), 5.78 (t,  $J = 8.4$  Hz, 1H), 5.01–5.00 (m, 1H), 4.54 (d,  $J = 10.8$  Hz, 1H), 4.02 (ddd,  $J = 10.8, 4.4, 2.4$  Hz, 1H), 3.09–3.05 (m, 1H), 2.73 (dd,  $J = 14.0, 8.0$  Hz, 1H), 2.63 (dd,  $J = 14.0, 9.6$  Hz, 1H), 2.37–2.30 (m, 1H), 2.24–2.16 (m, 1H), 2.12–2.08 (m, 1H), 2.02–1.86 (m, 2H), 1.56–1.45 (m, 1H), 1.31–1.27 (m, 1H), 1.12 (d,  $J = 7.8$  Hz, 3H);  $^{13}\text{C NMR}$  (100 MHz,  $\text{DMSO-d}_6$ )  $\delta$  180.5, 172.6, 159.3, 144.7, 141.3, 126.6, 123.8, 108.7, 80.2, 74.4, 71.4, 56.2, 41.0, 40.9, 37.5, 24.1, 21.2, 19.2, 13.4;  $^1\text{H NMR}$  (400 MHz,  $\text{CDCl}_3$ )  $\delta$  7.50 (s, 1H), 7.48 (s, 1H), 6.41 (s, 1H), 5.60 (t,  $J = 8.4$  Hz, 1H), 4.77 (d,  $J = 2.4$  Hz, 1H), 4.65 (d,  $J = 11.6$  Hz, 1H), 4.20 (ddd,  $J = 11.6, 4.8, 2.8$  Hz, 1H), 2.80–2.76 (m, 1H), 2.69 (dd,  $J = 14.0, 9.2$  Hz, 1H), 2.59 (dd,  $J = 14.0, 8.0$  Hz, 1H), 2.37–2.31 (m, 1H), 2.29–2.15 (m, 2H), 2.07–1.99 (m, 2H), 1.66–1.60 (m, 1H), 1.57–1.50 (m, 1H), 1.28 (d,  $J = 7.2$  Hz, 3H);  $^{13}\text{C NMR}$  (100 MHz,  $\text{CDCl}_3$ )  $\delta$  179.5, 172.6, 156.2, 144.6, 139.9, 129.4, 124.0, 107.8, 80.4, 74.2, 72.1, 56.3, 42.9, 42.4, 39.1, 24.7, 21.7, 19.6, 13.7; **FT-IR** (neat):  $\nu_{\text{max}} = 3366, 2924, 1740, 1697, 1204, 1161, 1020, 908, 800, 727$   $\text{cm}^{-1}$ ; **HRMS** (ESI): exact mass calculated for:



$C_{19}H_{20}O_6Na$   $[M+Na]^+$ : 367.1152, found: 367.1154. The spectroscopic data were identical with those reported in the literature.<sup>14</sup>

## 8. Enantioselective Synthesis of (+)-2-Hydroxyteuscorolide

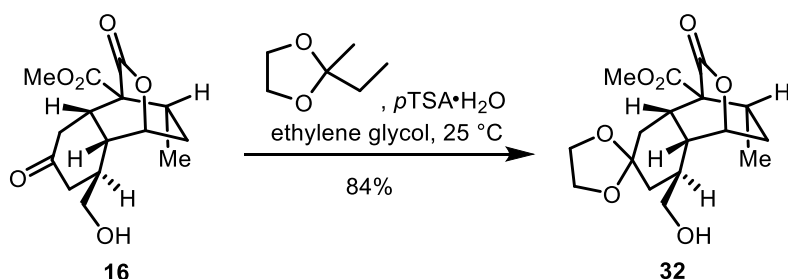

To a solution of ketone **16** (1.77 g, 5.97 mmol) in 2-methyl-2-ethyl-1,3-dioxolane (6.0 mL) was added *p*TSA·H<sub>2</sub>O (56.8 mg, 0.30 mmol) and ethylene glycol (50  $\mu$ L, 0.90 mmol) at 25 °C. After stirring at this temperature for 8 h, the reaction mixture was diluted with H<sub>2</sub>O (10 mL). The resulting mixture was extracted with Et<sub>2</sub>O (10 mL  $\times$  3). The combined extracts were washed with NaHCO<sub>3</sub> (10 mL, aq., sat.), dried over Na<sub>2</sub>SO<sub>4</sub>, and concentrated under reduced pressure. The residue was purified by flash column chromatography (silica gel, petroleum ether: ethyl acetate = 1: 2) to afford ketal **32** (1.71 g, 84%) as a white foam.

**32**: m.p. 49.1-50.5 °C;  $[\alpha]_D^{23} = -20.18$  ( $c = 1.00$ , CHCl<sub>3</sub>); **<sup>1</sup>H NMR** (400 MHz, CDCl<sub>3</sub>)  $\delta$  4.87 (dd,  $J = 5.6, 3.2$  Hz, 1H), 3.98–3.84 (m, 4H), 3.80 (s, 3H), 3.54 (d,  $J = 5.2$  Hz, 2H), 2.81–2.73 (m, 1H), 2.66–2.56 (m, 1H), 2.37–2.30 (m, 2H), 2.13–2.07 (m, 1H), 2.03 (dd,  $J = 14.8, 4.0$  Hz, 1H), 1.94–1.82 (m, 3H), 1.66–1.55 (m, 2H), 1.23 (d,  $J = 7.2$  Hz, 3H); **<sup>13</sup>C NMR** (100 MHz, CDCl<sub>3</sub>)  $\delta$  173.5, 169.2, 109.0, 76.8, 65.1, 64.0, 63.9, 55.6, 52.4, 40.4, 38.0, 34.9, 32.6, 31.5, 30.1, 28.2, 19.0; **FT-IR** (neat):  $\nu_{max} = 3549, 2957, 2887, 1732, 1435, 1333, 1258, 1098, 1065, 1032, 947, 908$  cm<sup>-1</sup>; **HRMS** (EI): exact mass calculated for: C<sub>17</sub>H<sub>24</sub>O<sub>7</sub> [M]<sup>+</sup>: 340.1517, found: 340.1516.

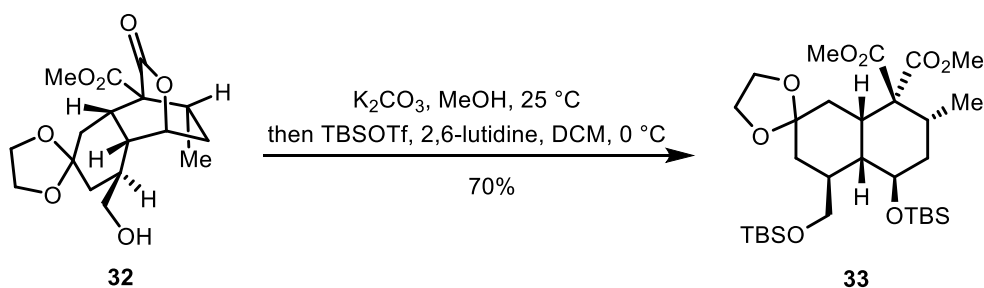

To a solution of lactone **32** (1.82 g, 5.35 mmol) in anhydrous MeOH (54 mL) was added K<sub>2</sub>CO<sub>3</sub> (1.85 g, 13.37 mmol) at 25 °C. After stirring at this temperature for 16 h, the reaction mixture was neutralized with dilute AcOH (30 mL, aq., 0.5 M). The resulting mixture was extracted with EtOAc

(50 mL × 3). The combined extracts were washed with brine, dried over Na<sub>2</sub>SO<sub>4</sub>, and concentrated under reduced pressure. The residue was used directly in the next step without further purification.

To a solution of the above crude product in DCM (139 mL) was added 2,6-lutidine (3.74 mL, 32.08 mmol) and TBSOTf (3.69 mL, 16.04 mmol) at 0 °C. After stirring at this temperature for 2 h, the reaction mixture was quenched with NaHCO<sub>3</sub> (100 mL, aq., sat.). The resulting mixture was extracted with DCM (100 mL × 3). The combined extracts were washed with brine, dried over Na<sub>2</sub>SO<sub>4</sub>, and concentrated under reduced pressure. The residue was purified by flash column chromatography (silica gel, petroleum ether: ethyl acetate = 25: 1) to afford **33** (2.26 g, 70%) as a colorless liquid.

**33**: [ $\alpha$ ]<sub>D</sub><sup>20</sup> = -33.96 (*c* = 1.03, CHCl<sub>3</sub>); **<sup>1</sup>H NMR** (400 MHz, CDCl<sub>3</sub>)  $\delta$  4.04–3.94 (m, 3H), 3.88 (t, *J* = 6.4 Hz, 2H), 3.71 (s, 3H), 3.63 (s, 3H), 3.63 (dd, *J* = 18.8, 9.2 Hz, 8H), 3.06 (d, *J* = 14.0 Hz, 1H), 2.96–2.93 (m, 1H), 2.37 (dd, *J* = 13.6, 6.8 Hz, 1H), 2.21 (d, *J* = 12.8 Hz, 1H), 1.86–1.63 (m, 5H), 1.51–1.47 (m, 1H), 1.12 (d, *J* = 7.2 Hz, 3H), 0.86 (s, 18H), 0.05–0.01 (m, 12H); **<sup>13</sup>C NMR** (100 MHz, CDCl<sub>3</sub>)  $\delta$  171.2, 170.1, 109.0, 64.8, 64.6, 63.9, 63.7, 61.7, 53.0, 52.3, 41.6, 39.8, 35.62, 35.56, 33.7, 32.4, 31.3, 25.9, 25.8, 18.6, 18.2, 18.0, -4.0, -4.7, -5.25, -5.32; **FT-IR** (neat):  $\nu_{\max}$  = 2928, 2855, 1735, 1472, 1256, 1213, 1084, 1024, 980, 835 cm<sup>-1</sup>; **HRMS** (ESI): exact mass calculated for: C<sub>30</sub>H<sub>56</sub>O<sub>8</sub>NaSi<sub>2</sub> [M+Na]<sup>+</sup>: 623.3406, found: 623.3407.

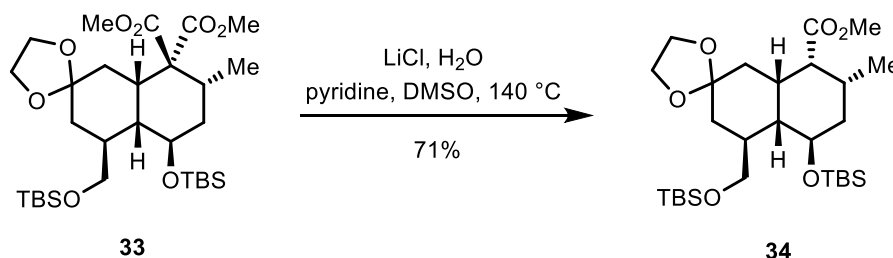

To a mixture of diester **33** (1.01 g, 1.68 mmol) in DMSO (4.2 ml) was added anhydrous LiCl (214 mg, 5.04 mmol), H<sub>2</sub>O (91  $\mu$ L, 5.04 mmol) and pyridine (133 mg, 1.68 mmol) at 25 °C. The reaction mixture was stirred at 140 °C for 12 h. The resulting mixture was diluted with H<sub>2</sub>O (50 ml) and extracted with EtOAc (50 mL × 4). The combined extracts were washed with brine, dried over Na<sub>2</sub>SO<sub>4</sub>, and concentrated under reduced pressure. The residue was purified by flash column chromatography (silica gel, petroleum ether: ethyl acetate = 30: 1) to afford **34** (652 mg, 71%, single isomer) as a colorless oil.

**34**: [ $\alpha$ ]<sub>D</sub><sup>21</sup> = -29.93 (*c* = 1.08, CHCl<sub>3</sub>); **<sup>1</sup>H NMR** (400 MHz, CDCl<sub>3</sub>)  $\delta$  3.99–3.93 (m, 3H), 3.90–3.84 (m, 2H), 3.68–3.62 (m, 5H), 2.64–2.57 (m, 2H), 2.51–2.39 (m, 2H), 1.95–1.88 (m, 2H), 1.77–1.60 (m, 3H), 1.53–1.46 (m, 2H), 1.07 (d, *J* = 7.6 Hz, 3H), 0.87 (s, 18H), 0.05 (s, 3H), 0.04 (s, 3H), 0.01 (s, 6H); **<sup>13</sup>C NMR** (100 MHz, CDCl<sub>3</sub>)  $\delta$  173.8, 109.1, 65.1, 64.4, 64.1, 63.6, 51.3, 48.7, 44.6, 42.2, 35.6,

34.8, 32.4, 31.8, 29.9, 25.9, 25.8, 18.3, 18.2, 18.0, -4.1, -4.7, -5.2, -5.4; **FT-IR** (neat):  $\nu_{\max}$  = 2930, 2855, 1736, 1472, 1360, 1250, 1202, 1076, 970, 833, 772  $\text{cm}^{-1}$ ; **HRMS** (ESI): exact mass calculated for:  $\text{C}_{28}\text{H}_{54}\text{O}_6\text{NaSi}_2$   $[\text{M}+\text{Na}]^+$ : 565.3351, found: 565.3344.

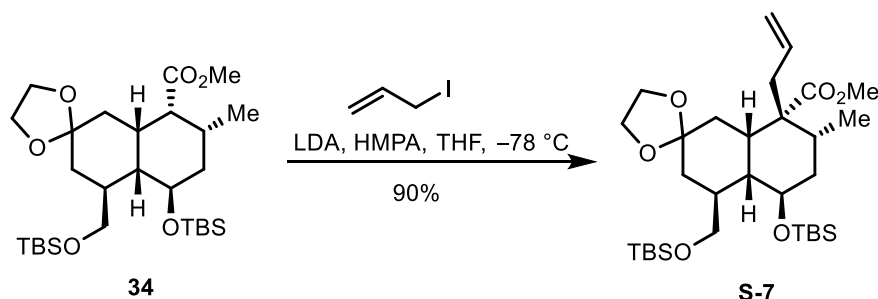

To a solution of **34** (968 mg, 1.78 mmol) in THF (18 mL) was added LDA (8.92 mL, 8.92 mmol, 1.0 M in THF) at  $-78\text{ }^\circ\text{C}$ . After stirring at this temperature for 6 h, the reaction mixture was added HMPA (1.60 g, 8.92 mmol) and allyl iodide (449 mg, 2.67 mmol) sequentially. The reaction mixture was allowed to warm to  $0\text{ }^\circ\text{C}$ . After stirring at this temperature for 2 h, the reaction mixture was quenched with  $\text{NH}_4\text{Cl}$  (20 mL, aq., sat.). The resulting mixture was extracted with  $\text{Et}_2\text{O}$  (20 mL  $\times$  3). The combined extracts were washed with brine, dried over  $\text{Na}_2\text{SO}_4$ , and concentrated under reduced pressure. The residue was purified by flash column chromatography (silica gel, petroleum ether: ethyl acetate = 25: 1) to afford allylation product **S-7** (932 mg, 90% yield) as a colorless oil.

**S-7**:  $[\alpha]_{\text{D}}^{20} = -27.03$  ( $c = 1.00$ ,  $\text{CHCl}_3$ );  **$^1\text{H}$  NMR** (400 MHz,  $\text{CDCl}_3$ )  $\delta$  5.68–5.57 (m, 1H), 5.06 (s, 1H), 5.02 (d,  $J = 6.0$  Hz, 1H), 4.03–3.94 (m, 3H), 3.85 (t,  $J = 6.4$  Hz, 2H), 3.66 (s, 3H), 3.61 (d,  $J = 7.6$  Hz, 2H), 2.59 (dd,  $J = 14.0, 7.6$  Hz, 1H), 2.47 (dd,  $J = 14.0, 7.2$  Hz, 1H), 2.41–2.33 (m, 2H), 2.20 (br, 1H), 1.93–1.83 (m, 2H), 1.77–1.62 (m, 5H), 1.12 (d,  $J = 7.2$  Hz, 3H), 0.88 (s, 18H), 0.06 (s, 3H), 0.04 (s, 3H), 0.02 (s, 6H);  **$^{13}\text{C}$  NMR** (100 MHz,  $\text{CDCl}_3$ )  $\delta$  175.1, 133.7, 118.0, 109.3, 65.0, 64.6, 64.5, 63.6, 53.2, 51.0, 42.7, 39.0, 38.5, 35.6, 35.5, 34.8, 33.3, 31.5, 25.89, 25.86, 19.7, 18.2, 18.0, -4.0, -4.7, -5.25, -5.31; **FT-IR** (neat):  $\nu_{\max}$  = 2926, 2855, 1732, 1472, 1256, 1088, 835, 773  $\text{cm}^{-1}$ ; **HRMS** (ESI): exact mass calculated for:  $\text{C}_{31}\text{H}_{58}\text{O}_6\text{NaSi}_2$   $[\text{M}+\text{Na}]^+$ : 605.3664, found: 605.3671.

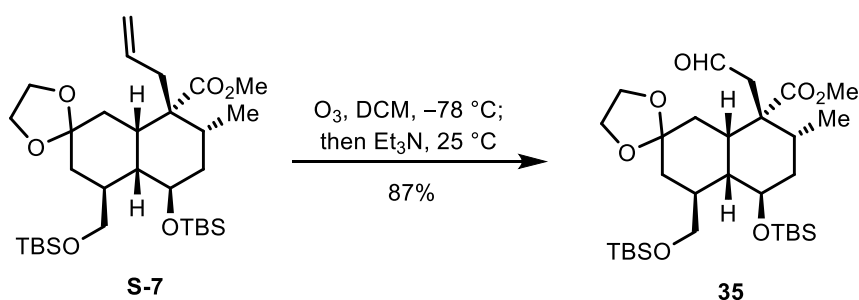

To a solution of **S-7** (885 mg, 1.52 mmol) in DCM (152 mL) at  $-78\text{ }^{\circ}\text{C}$  was bubbled with ozone at  $-78\text{ }^{\circ}\text{C}$  until the solution turned blue. After the excess ozone was excluded by the argon stream,  $\text{Et}_3\text{N}$  (422  $\mu\text{L}$ , 3.03 mmol) was added. After stirring at  $25\text{ }^{\circ}\text{C}$  for 2 h, the reaction mixture was concentrated under reduced pressure. The residue was purified by flash column chromatography (silica gel, petroleum ether: ethyl acetate = 8: 1) to afford aldehyde **35** (772 mg, 87% yield) as a colorless oil.

**35**:  $[\alpha]_{\text{D}}^{22} = -34.19$  ( $c = 1.01$ ,  $\text{CHCl}_3$ );  $^1\text{H NMR}$  (400 MHz,  $\text{CDCl}_3$ )  $\delta$  9.68 (s, 1H), 4.04–3.98 (m, 1H), 3.95–3.83 (m, 4H), 3.69 (s, 3H), 3.63–3.55 (m, 2H), 2.80–2.70 (m, 2H), 2.41–2.38 (m, 2H), 2.18–2.15 (m, 1H), 1.89–1.82 (m, 3H), 1.74–1.64 (m, 4H), 1.13 (d,  $J = 7.2$  Hz, 3H), 0.87 (s, 18H), 0.05 (s, 3H), 0.04 (s, 3H), 0.02–0.01 (m, 6H);  $^{13}\text{C NMR}$  (100 MHz,  $\text{CDCl}_3$ )  $\delta$  200.7, 174.1, 108.9, 64.7, 64.6, 64.5, 63.7, 51.5, 50.7, 39.1, 38.4, 36.8, 35.6, 35.3, 33.6, 31.7, 25.9, 25.9, 19.0, 18.1, 17.9,  $-4.1$ ,  $-4.7$ ,  $-5.32$ ,  $-5.34$ ; **FT-IR** (neat):  $\nu_{\text{max}} = 2953, 2859, 1722, 1472, 1250, 1086, 976, 835, 773, 669\text{ cm}^{-1}$ ; **HRMS** (ESI): exact mass calculated for:  $\text{C}_{30}\text{H}_{56}\text{O}_7\text{NaSi}_2$   $[\text{M}+\text{Na}]^+$ : 607.3457, found: 607.3463.

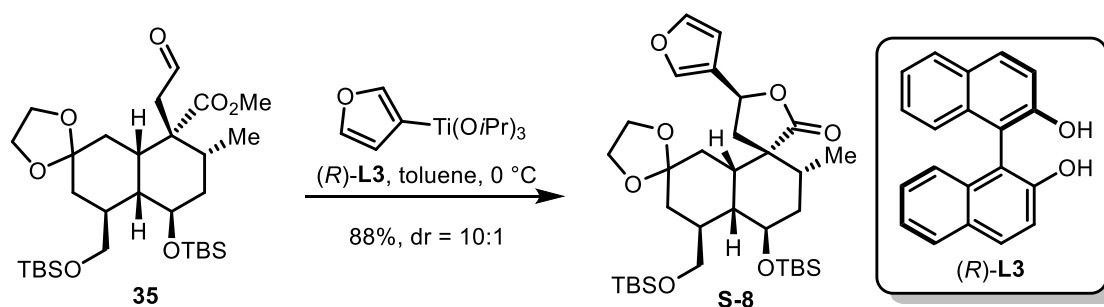

To a solution of (3-furyl) $\text{Ti}(\text{O}i\text{Pr})_3$ <sup>[6]</sup> (99.9 mg, 0.34 mmol) and (*R*)-**L3** (9.8 mg, 20 mol%) in toluene (3.4 mL) was added aldehyde **35** (100 mg in 0.3 mL toluene, 0.17 mmol) dropwise at  $0\text{ }^{\circ}\text{C}$ . After stirring at this temperature for 2 h, the reaction mixture was quenched with NaOH (5.0 mL, aq., 1.0 M). The resulting mixture was extracted with EtOAc (5.0 mL  $\times$  3). The combined extracts were washed with brine, dried over  $\text{Na}_2\text{SO}_4$ , and concentrated under reduced pressure. The residue was purified by flash chromatography column (silica gel, petroleum ether: ethyl acetate = 20: 1) to afford **S-8** (93.7 mg, 88%, 10: 1 dr) as a white foam.

**S-8**: m.p.  $50.1\text{--}51.5\text{ }^{\circ}\text{C}$ ;  $[\alpha]_{\text{D}}^{21} = -12.57$  ( $c = 1.01$ ,  $\text{CHCl}_3$ );  $^1\text{H NMR}$  (400 MHz,  $\text{CDCl}_3$ )  $\delta$  7.45 (s, 1H), 7.42 (s, 1H), 6.39 (s, 1H), 5.35–5.31 (m, 1H), 4.07 (br s, 1H), 3.90 (s, 4H), 3.66–3.58 (m, 2H), 2.60 (dd,  $J = 12.0, 6.0$  Hz, 1H), 2.45 (d,  $J = 3.2$  Hz, 1H), 2.30 (br s, 1H), 2.21–2.16 (m, 1H), 2.05–1.97 (m, 2H), 1.90–1.78 (m, 3H), 1.72 (dd,  $J = 13.6, 5.6$  Hz, 1H), 1.62–1.58 (m, 1H), 1.48 (t,  $J = 8.0$  Hz, 1H), 1.24 (d,  $J = 12.0$  Hz, 3H), 0.88 (s, 9H), 0.87 (s, 9H), 0.06–0.04 (m, 12H);  $^{13}\text{C NMR}$  (100 MHz,  $\text{CDCl}_3$ )  $\delta$  177.1, 143.9, 139.6, 124.6, 108.9, 108.2, 70.6, 65.2, 64.6, 64.5, 64.1, 50.1, 44.8, 36.2, 35.4, 35.1, 25.9, 25.8, 18.2, 17.9, 16.8,  $-4.3$ ,  $-4.7$ ,  $-5.3$ ,  $-5.4$ ; **FT-IR** (neat):  $\nu_{\text{max}} = 2928, 2857, 1763, 1472,$

1252, 1086, 1024, 874, 835, 773  $\text{cm}^{-1}$ ; **HRMS** (ESI): exact mass calculated for:  $\text{C}_{33}\text{H}_{56}\text{O}_7\text{NaSi}_2$   $[\text{M}+\text{Na}]^+$ : 643.3457, found: 643.3462.

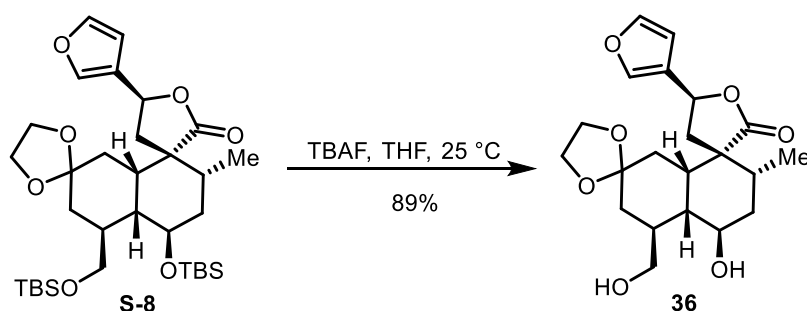

To a solution of **S-8** (5.6 mg, 0.009 mmol) in THF (0.3 ml) was added TBAF (27  $\mu\text{L}$ , 0.027 mmol, 1.0 M in THF) dropwise at 25  $^\circ\text{C}$ . After stirring at this temperature for 12 h, the reaction mixture was quenched with  $\text{NH}_4\text{Cl}$  (1.0 mL, aq., sat.). The resulting mixture was extracted with EtOAc (1.0 mL  $\times$  3). The combined extracts were washed with brine, dried over  $\text{Na}_2\text{SO}_4$ , and concentrated under reduced pressure. The residue was purified by flash column chromatography (silica gel, dichloromethane:methanol = 25: 1) to afford diol **36** (3.1 mg, 89% yield) as a white foam.

**36**: m.p. 61.3-62.3  $^\circ\text{C}$ ;  $[\alpha]_{\text{D}}^{22} = -11.68$  ( $c = 1.04$ ,  $\text{CHCl}_3$ );  **$^1\text{H}$  NMR** (400 MHz,  $\text{CDCl}_3$ )  $\delta$  7.47 (s, 1H), 7.42 (t,  $J = 1.6$  Hz, 1H), 6.40 (d,  $J = 1.2$  Hz, 1H), 5.35 (dd,  $J = 9.6, 6.4$  Hz, 1H), 4.03 (ddd,  $J = 9.2, 7.2, 4.8$  Hz, 1H), 3.92 (s, 4H), 3.75 (dd,  $J = 11.2, 6.8$  Hz, 1H), 3.68 (dd,  $J = 11.2, 5.4$  Hz, 1H), 2.67 (dd,  $J = 13.3, 6.4$  Hz, 1H), 2.52–2.39 (m, 4H), 2.18 (dd,  $J = 13.2, 10.0$  Hz, 1H), 2.09 (ddd,  $J = 13.2, 6.8, 4.8$  Hz, 1H), 2.05–1.97 (m, 1H), 1.92–1.76 (m, 4H), 1.63 (d,  $J = 14.0$  Hz, 1H), 1.54 (ddd,  $J = 13.6, 7.2, 4.0$  Hz, 1H), 1.25 (d,  $J = 7.2$  Hz, 3H);  **$^{13}\text{C}$  NMR** (100 MHz,  $\text{CDCl}_3$ )  $\delta$  176.9, 144.0, 139.8, 124.3, 108.6, 108.2, 70.7, 66.4, 64.63, 64.61, 64.1, 50.1, 44.6, 41.0, 38.2, 36.6, 35.9, 35.7, 34.8, 33.8, 16.7; **FT-IR** (neat):  $\nu_{\text{max}} = 3468, 2934, 1757, 1506, 1269, 1182, 1157, 1022, 968, 874, 795, 734$   $\text{cm}^{-1}$ ; **HRMS** (ESI): exact mass calculated for:  $\text{C}_{21}\text{H}_{28}\text{O}_7\text{Na}$   $[\text{M}+\text{Na}]^+$ : 415.1727, found: 415.1721.

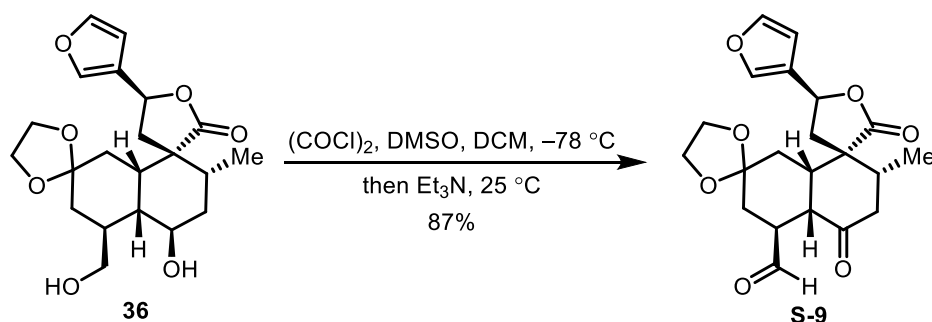

To a stirred solution of DCM (5.2 mL) and oxalyl chloride (105  $\mu\text{L}$ , 1.24 mmol) was added DMSO (177  $\mu\text{L}$ , 2.49 mmol) dropwise at  $-78$   $^\circ\text{C}$ . After stirring at this temperature for 10 min, the reaction

mixture was added **36** (203 mg, 0.52 mmol) slowly and stirred for another 30 min. Then Et<sub>3</sub>N (865  $\mu$ L, 6.22 mmol) was added and the resulting mixture was stirred at  $-78$  °C for 5 min. After warming to 25 °C slowly and stirring at this temperature for 2 h, the reaction mixture was quenched with NaHCO<sub>3</sub> (5.0 mL, aq., sat.). The resulting mixture was extracted with DCM (5.0 mL  $\times$  3). The combined extracts were washed brine, dried over Na<sub>2</sub>SO<sub>4</sub>, and concentrated under reduced pressure. The residue was purified by flash column chromatography (silica gel, petroleum ether: ethyl acetate = 2: 1) to afford ketoaldehyde **S-9** (176 mg, 87% yield) as a colorless oil.

**S-9**:  $[\alpha]_D^{30} = -156.77$  ( $c = 1.01$ , CHCl<sub>3</sub>); **<sup>1</sup>H NMR** (400 MHz, CDCl<sub>3</sub>)  $\delta$  9.64 (s, 1H), 7.51 (d,  $J = 0.4$  Hz, 1H), 7.45 (t,  $J = 1.6$  Hz, 1H), 6.43 (s, 1H), 5.40 (dd,  $J = 10.4, 5.6$  Hz, 1H), 4.02–3.87 (m, 4H), 3.43 (d,  $J = 5.2$  Hz, 1H), 3.32–3.30 (m, 1H), 2.84 (dd,  $J = 18.4, 12.8$  Hz, 1H), 2.65 (dd,  $J = 12.8, 5.6$  Hz, 1H), 2.55 (dt,  $J = 12.8, 5.6$  Hz, 1H), 2.42–2.34 (m, 2H), 2.32–2.23 (m, 1H), 2.19 (d,  $J = 14.0$  Hz, 1H), 1.96 (dd,  $J = 14.0, 7.2$  Hz, 1H), 1.62–1.58 (m, 1H), 1.55–1.49 (m, 1H), 1.16 (d,  $J = 6.8$  Hz, 3H); **<sup>13</sup>C NMR** (100 MHz, CDCl<sub>3</sub>)  $\delta$  210.3, 202.7, 175.6, 144.1, 140.1, 123.4, 108.2, 107.5, 71.3, 64.8, 64.7, 50.3, 45.3, 44.6, 42.9, 42.6, 39.2, 37.4, 33.0, 31.3, 15.6; **FT-IR** (neat):  $\nu_{\max} = 2962, 1755, 1707, 1506, 1354, 1157, 1117, 1026, 874, 812, 733$  cm<sup>-1</sup>; **HRMS** (EI): exact mass calculated for: C<sub>21</sub>H<sub>24</sub>O<sub>7</sub> [M]<sup>+</sup>: 388.1517, found: 388.1520.

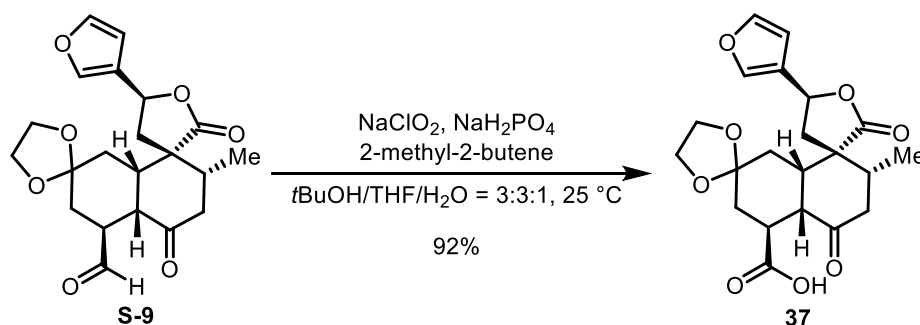

To a mixture of ketoaldehyde **S-9** (354 mg, 0.91 mmol) and NaH<sub>2</sub>PO<sub>4</sub> (394 mg, 3.28 mmol) in *t*BuOH/THF/H<sub>2</sub>O (v:v:v = 3:3:1, 30.3 mL) was added 2-methyl-2-butene (1.45 mL, 17.2 mmol) and NaClO<sub>2</sub> (346 mg, 3.83 mmol) sequentially at 25 °C. After stirring at this temperature for 1 h, the reaction mixture was diluted with NH<sub>4</sub>Cl (30 mL, aq., sat.). The resulting mixture was extracted with EtOAc (40 mL  $\times$  3). The combined extracts were washed with brine, dried over Na<sub>2</sub>SO<sub>4</sub>, and concentrated under reduced pressure. The residue was purified by flash column chromatography (silica gel, dichloromethane: methanol = 20: 1) to afford carboxylic acid **37** (338 mg, 92% yield) as a white solid.

**37**: m.p. 215.0-215.9 °C;  $[\alpha]_D^{21} = -2.49$  ( $c = 0.64$ , CHCl<sub>3</sub>); **<sup>1</sup>H NMR** (400 MHz, CD<sub>3</sub>CN)  $\delta$  7.66 (s, 1H), 7.54 (t,  $J = 1.6$  Hz, 1H), 6.56 (d,  $J = 1.2$  Hz, 1H), 5.47 (dd,  $J = 10.8, 5.6$  Hz, 1H), 3.94–3.80 (m,

4H), 3.40–3.35 (m, 2H), 2.87 (dt,  $J = 13.2, 5.2$  Hz, 1H), 2.67 (dd,  $J = 18.0, 12.4$  Hz, 1H), 2.58 (dd,  $J = 12.8, 6.0$  Hz, 1H), 2.44 (dd,  $J = 12.8, 10.8$  Hz, 1H), 2.40–2.28 (m, 2H), 2.20 (d,  $J = 14.0$  Hz, 1H), 1.61 (dd,  $J = 14.0, 6.4$  Hz, 1H), 1.52–1.41 (m, 2H), 1.10 (d,  $J = 6.4$  Hz, 3H);  $^{13}\text{C}$  NMR (100 MHz,  $\text{CD}_3\text{CN}$ )  $\delta$  210.9, 177.1, 175.5, 145.2, 142.1, 124.8, 109.5, 108.4, 72.1, 65.2, 65.1, 51.4, 46.0, 45.0, 43.3, 40.4, 38.7, 37.6, 33.5, 32.4, 15.9; **FT-IR** (neat):  $\nu_{\text{max}} = 2965, 1765, 1717, 1686, 1506, 1159, 1142, 1016, 874, 791, 781, 735, 683$   $\text{cm}^{-1}$ ; **HRMS** (EI): exact mass calculated for:  $\text{C}_{21}\text{H}_{24}\text{O}_8$   $[\text{M}]^+$ : 404.1466, found: 404.1469.

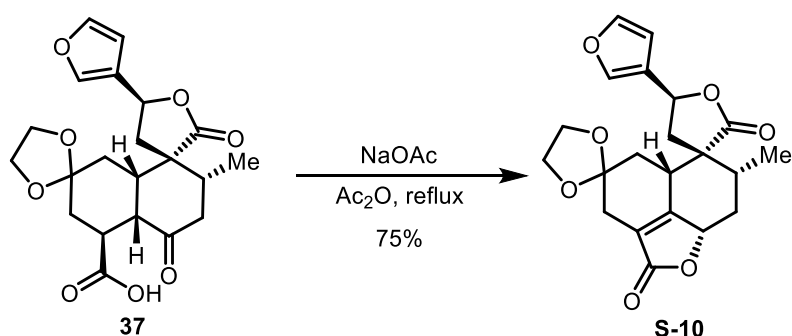

To a solution of **37** (209 mg, 0.52 mmol) in  $\text{Ac}_2\text{O}$  (4.0 mL) was added  $\text{NaOAc}$  (19.0 mg, 0.23 mmol) at 25 °C. After stirring at 150 °C for 20 h, the reaction mixture was cooled to 25 °C and diluted with  $\text{EtOAc}$  (50 mL). The resulting mixture was washed with brine, dried over  $\text{Na}_2\text{SO}_4$ , and concentrated under reduced pressure. The residue was purified by column chromatography (silica gel, dichloromethane: methanol = 20: 1) to afford **S-10** (150 mg, 75%) as a white solid.

**S-10**: the m.p. could not be determined because this compound will be decomposed at 270 °C;  $[\alpha]_{\text{D}}^{26} = +96.18$  ( $c = 0.25, \text{CHCl}_3$ );  $^1\text{H}$  NMR (400 MHz,  $\text{CDCl}_3$ )  $\delta$  7.45 (s, 2H), 6.38 (s, 1H), 5.41 (t,  $J = 8.4$  Hz, 1H), 4.83–4.79 (m, 1H), 4.14–3.90 (m, 4H), 2.96–2.92 (m, 1H), 2.55 (d,  $J = 8.4$  Hz, 2H), 2.45–2.38 (m, 2H), 2.31 (dd,  $J = 24.0, 12.4$  Hz, 1H), 2.23–2.15 (m, 2H), 1.96–1.87 (m, 1H), 1.76 (dd,  $J = 12.4, 10.8$  Hz, 1H), 1.09 (d,  $J = 6.8$  Hz, 3H);  $^{13}\text{C}$  NMR (100 MHz,  $\text{CDCl}_3$ )  $\delta$  175.4, 172.2, 160.8, 144.3, 139.6, 124.7, 124.3, 108.7, 107.9, 78.0, 71.7, 65.0, 64.7, 53.4, 41.6, 40.6, 36.0, 34.9, 34.4, 30.6, 17.0; **FT-IR** (neat):  $\nu_{\text{max}} = 1761, 1740, 1694, 1344, 1292, 1180, 1042, 1013, 962, 872, 754$   $\text{cm}^{-1}$ ; **HRMS** (EI): exact mass calculated for:  $\text{C}_{21}\text{H}_{22}\text{O}_7$   $[\text{M}]^+$ : 386.1360, found: 386.1360.

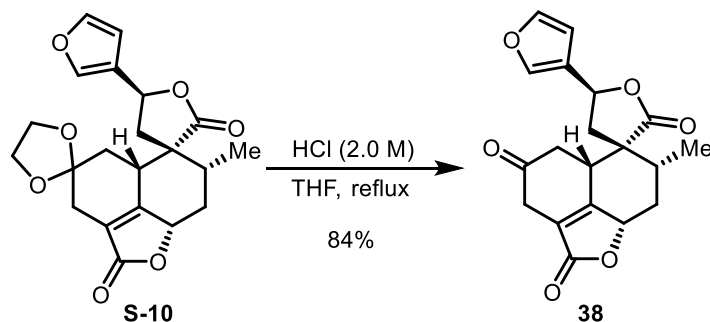

To a solution of **S-10** (176 mg, 0.45 mmol) in THF (4.6 mL) was added HCl (0.91 mL, aq., 2.0 M). After stirring under reflux for 20 h, the reaction mixture was quenched with NaHCO<sub>3</sub> (5.0 mL, aq., sat.) at 25 °C. The resulting mixture was extracted with EtOAc (5.0 mL × 3). The combined extracts were washed with brine, dried over Na<sub>2</sub>SO<sub>4</sub>, and concentrated under reduced pressure. The residue was purified by flash column chromatography (silica gel, petroleum ether: ethyl acetate = 1: 2) to afford ketone **38** (131 mg, 84%) as a white solid.

**38**: m.p. 207.5-209.3 °C; [ $\alpha$ ]<sub>D</sub><sup>26</sup> = +127.73 (*c* = 0.90, CHCl<sub>3</sub>); **<sup>1</sup>H NMR** (400 MHz, CDCl<sub>3</sub>)  $\delta$  7.43–7.39 (m, 2H), 6.32 (s, 1H), 5.42 (t, *J* = 8.4 Hz, 1H), 4.82 (t, *J* = 8.8 Hz, 1H), 3.15–3.10 (m, 2H), 3.03–2.97 (m, 1H), 2.89 (dd, *J* = 15.2, 8.0 Hz, 1H), 2.51–2.41 (m, 3H), 2.27–2.21 (m, 1H), 2.13 (dd, *J* = 23.6, 12.4 Hz, 1H), 1.94–1.85 (m, 1H), 0.99 (d, *J* = 6.8 Hz, 3H); **<sup>13</sup>C NMR** (100 MHz, CDCl<sub>3</sub>)  $\delta$  202.8, 175.1, 171.1, 159.6, 144.4, 139.5, 124.6, 123.4, 107.8, 78.0, 72.0, 53.8, 42.7, 40.0, 39.4, 36.5, 36.0, 34.9, 17.1; **FT-IR** (neat):  $\nu_{\max}$  = 2930, 1736, 1701, 1510, 1175, 1148, 1015, 874, 806 cm<sup>-1</sup>; **HRMS** (EI): exact mass calculated for: C<sub>19</sub>H<sub>18</sub>O<sub>6</sub> [M]<sup>+</sup>: 342.1098, found: 342.1101.

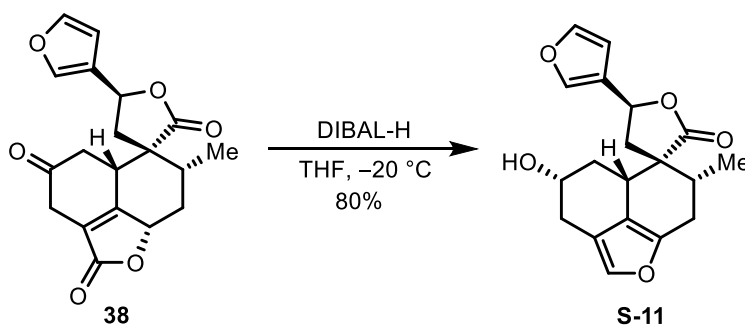

To a solution of compound **38** (13.4 mg, 0.039 mmol) in THF (1.0 mL) was added DIBAL-H (117  $\mu$ L, 0.117 mmol, 1.0 M in hexane) dropwise at  $-20$  °C. After stirring at this temperature for 30 min, the reaction mixture was quenched with HCl (60  $\mu$ L, aq., 2.0 M) to adjust the pH value to 1~2. The resulting mixture was extracted with EtOAc (1.0 mL × 3). The combined extracts were washed with brine, dried over Na<sub>2</sub>SO<sub>4</sub>, and concentrated under reduced pressure. The residue was purified by flash chromatography column (silica gel, petroleum ether: ethyl acetate = 1: 1) to afford **S-11** (10.3 mg, 80%) as a colorless oil.

**S-11**: [ $\alpha$ ]<sub>D</sub><sup>25</sup> = +86.05 (*c* = 0.44, CHCl<sub>3</sub>); **<sup>1</sup>H NMR** (400 MHz, CDCl<sub>3</sub>)  $\delta$  7.46 (d, *J* = 0.8 Hz, 1H), 7.44 (t, *J* = 1.6 Hz, 1H), 7.07 (s, 1H), 6.401–6.395 (m, 1H), 5.46 (t, *J* = 8.4 Hz, 1H), 4.13–4.06 (m, 1H), 3.07 (dd, *J* = 15.6, 6.0 Hz, 1H), 2.92–2.87 (m, 1H), 2.84–2.74 (m, 2H), 2.62 (dd, *J* = 13.6, 8.8 Hz, 1H), 2.48 (dd, *J* = 13.6, 8.4 Hz, 1H), 2.35–2.23 (m, 3H), 1.90 (br s, 1H), 1.43 (dd, *J* = 23.6, 11.2 Hz, 1H), 1.16 (d, *J* = 6.8 Hz, 3H); **<sup>13</sup>C NMR** (100 MHz, CDCl<sub>3</sub>)  $\delta$  175.3, 148.1, 144.1, 139.7, 136.4, 125.2, 118.5, 116.0, 108.0, 71.6, 70.0, 50.5, 41.4, 39.5, 36.4, 35.5, 29.9, 29.8, 17.7; **FT-IR** (neat):  $\nu_{\max}$  = 3445,



2969, 1754, 1502, 1266, 1177, 1151, 1014, 871, 807, 732  $\text{cm}^{-1}$ ; **HRMS** (ESI): exact mass calculated for:  $\text{C}_{19}\text{H}_{20}\text{O}_5\text{Na}$   $[\text{M}+\text{Na}]^+$ : 351.1203, found: 351.1197.

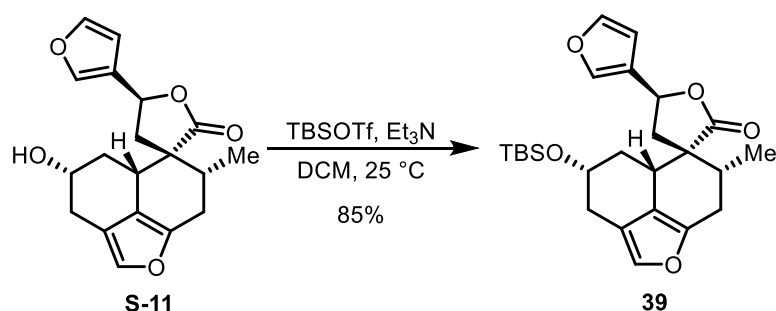

To a solution of **S-11** (8.7 mg, 0.027 mmol) in DCM (0.54 mL) were added  $\text{Et}_3\text{N}$  (7.4  $\mu\text{L}$ , 0.053 mmol) and TBSOTf (9.2  $\mu\text{L}$ , 0.040 mmol) at 25  $^\circ\text{C}$ . After stirring at this temperature for 1 h, the reaction mixture was quenched with  $\text{NaHCO}_3$  (1.0 mL, aq., sat.). The resulting mixture was extracted with EtOAc (1.0 mL  $\times$  3). The combined extracts were washed with brine, dried over  $\text{Na}_2\text{SO}_4$ , and concentrated under reduced pressure. The residue was purified by flash chromatography column (silica gel, petroleum ether: ethyl acetate = 10: 1) to afford **39** (9.9 mg, 85%) as a colorless oil.

**39**:  $[\alpha]_{\text{D}}^{22} = +61.15$  ( $c = 0.33$ ,  $\text{CHCl}_3$ );  **$^1\text{H NMR}$**  (400 MHz,  $\text{CDCl}_3$ )  $\delta$  7.49 (s, 1H), 7.45 (t,  $J = 4.6$  Hz, 1H), 7.05 (s, 1H), 6.42 (s, 1H), 5.43 (t,  $J = 8.4$  Hz, 1H), 4.11–4.03 (m, 1H), 2.93 (dd,  $J = 16.0, 6.0$  Hz, 1H), 2.89–2.85 (m, 1H), 2.84–2.73 (m, 2H), 2.62 (dd,  $J = 13.6, 8.8$  Hz, 1H), 2.49 (dd,  $J = 13.6, 8.4$  Hz, 1H), 2.40–2.34 (m, 1H), 2.30–2.21 (m, 1H), 2.13–2.09 (m, 1H), 1.49 (q,  $J = 11.6$  Hz, 1H), 1.15 (d,  $J = 6.8$  Hz, 3H), 0.92 (s, 9H), 0.121 (s, 3H), 0.116 (s, 3H);  **$^{13}\text{C NMR}$**  (100 MHz,  $\text{CDCl}_3$ )  $\delta$  175.1, 148.0, 144.1, 139.7, 136.2, 125.4, 119.0, 116.1, 108.1, 71.4, 70.6, 50.5, 41.5, 39.4, 36.6, 35.9, 30.1, 30.0, 25.9, 18.1, 17.7,  $-4.4, -4.6$ ; **FT-IR** (neat):  $\nu_{\text{max}} = 2929, 2854, 1763, 1471, 1255, 1087, 1012, 871, 776, 741$   $\text{cm}^{-1}$ ; **HRMS** (ESI): exact mass calculated for:  $\text{C}_{25}\text{H}_{34}\text{O}_5\text{NaSi}$   $[\text{M}+\text{Na}]^+$ : 465.2068, found: 465.2062.

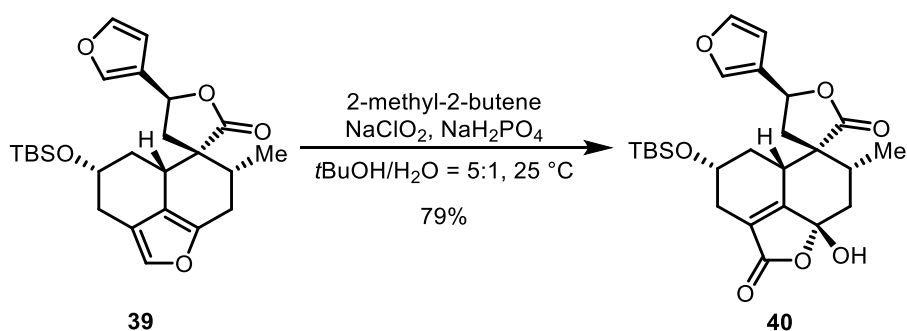

To a solution of **39** (7.9 mg, 0.018 mmol) in  $t\text{BuOH}/\text{H}_2\text{O}$  ( $v:v = 5:1$ , 0.6 mL) was added  $\text{NaH}_2\text{PO}_4$  (8.5 mg, 0.071 mmol), 2-methyl-2-butene (30  $\mu\text{L}$ , 0.357 mmol), and  $\text{NaClO}_2$  (10.3 mg, 0.114 mmol)

sequentially at 25 °C. After stirring at this temperature for 2 h, the reaction mixture was diluted with H<sub>2</sub>O (2.0 mL) and extracted with EtOAc (2.0 mL × 3). The combined extracts were washed with brine, dried over Na<sub>2</sub>SO<sub>4</sub>, and concentrated under reduced pressure. The residue was purified by column chromatography (silica gel, petroleum ether: ethyl acetate = 3: 2) to afford **40** (6.7 mg, 79%) as a white solid.

**40**: m.p. 252.8-253.1 °C;  $[\alpha]_D^{26} = +89.24$  ( $c = 0.22$ , CHCl<sub>3</sub>); **<sup>1</sup>H NMR** (400 MHz, CDCl<sub>3</sub>) δ 7.48 (br s, 1H), 7.45 (br s, 1H), 6.404–6.400 (m, 1H), 5.44 (t,  $J = 8.4$  Hz, 1H), 3.94–3.87 (m, 1H), 3.65 (br s, 1H), 2.99–2.94 (m, 1H), 2.62–2.46 (m, 4H), 2.29–2.07 (m, 4H), 1.52 (dd,  $J = 23.2, 11.8$  Hz, 1H), 1.04 (d,  $J = 6.8$  Hz, 3H), 0.90 (s, 9H), 0.08 (s, 6H); **<sup>13</sup>C NMR** (100 MHz, CDCl<sub>3</sub>) δ 175.5, 170.2, 159.4, 144.3, 139.6, 126.4, 124.8, 108.0, 102.0, 71.8, 68.2, 54.2, 40.21, 40.19, 39.8, 35.9, 34.4, 29.4, 25.8, 18.0, 16.7, -4.5, -4.7; **FT-IR** (neat):  $\nu_{\max} = 3393, 2934, 2865, 1761, 1469, 1259, 1182, 1101, 1043, 915, 835, 736$  cm<sup>-1</sup>; **HRMS** (ESI): exact mass calculated for: C<sub>25</sub>H<sub>34</sub>O<sub>7</sub>NaSi [M+Na]<sup>+</sup>: 497.1966, found: 497.1958.

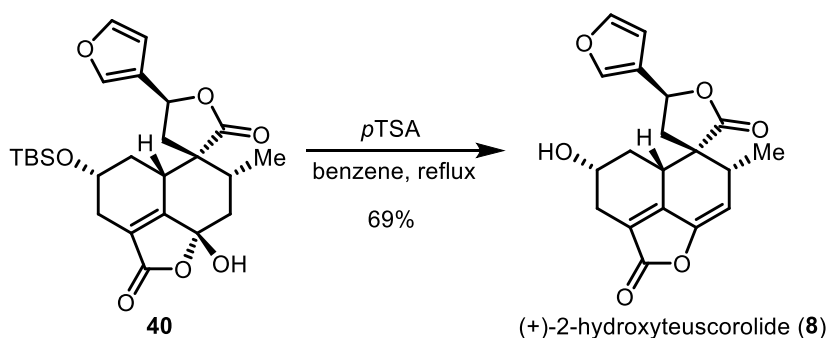

To a solution of **40** (4.9 mg, 0.010 mmol) in benzene (2.5 mL) was added *p*TSA (3.5 mg, 0.021 mmol) at 25 °C. After stirring under reflux for 2 h, the reaction mixture was cooled to 25 °C, and concentrated under reduced pressure. The residue was purified by flash chromatography column (silica gel, petroleum ether: ethyl acetate = 1: 3) to afford (+)-2-hydroxyteuscorolide (**8**) (2.4 mg, 69%) as a white solid.

(+)-2-Hydroxyteuscorolide (**8**): m.p. 249.2-250.3 °C;  $[\alpha]_D^{25} = +10.40$  ( $c = 0.20$ , CHCl<sub>3</sub>:C<sub>5</sub>H<sub>5</sub>N = 9:1); **<sup>1</sup>H NMR** (400 MHz, pyridine-d<sub>5</sub>) δ 7.81 (s, 1H), 7.71 (t,  $J = 2.0$  Hz, 1H), 6.61 (s, 1H), 5.62 (t,  $J = 8.4$  Hz, 1H), 5.46 (s, 1H), 4.43–4.34 (m, 1H), 3.15–3.12 (m, 1H), 2.99 (dd,  $J = 17.2, 5.2$  Hz, 1H), 2.86–2.79 (m, 2H), 2.69 (dd,  $J = 14.0, 8.4$  Hz, 1H), 2.55 (dd,  $J = 14.0, 9.2$  Hz, 1H), 2.44 (ddd,  $J = 16.8, 9.2, 3.6$  Hz, 1H), 1.86 (dd,  $J = 22.8, 11.6$  Hz, 1H), 1.23 (d,  $J = 7.2$  Hz, 3H); **<sup>13</sup>C NMR** (100 MHz, pyridine-d<sub>5</sub>) δ 175.1, 169.1, 151.3, 147.2, 144.7, 140.6, 125.5, 122.8, 109.1, 108.8, 71.7, 67.5, 53.7, 40.1, 39.0, 37.7, 34.6, 30.1, 16.7; **FT-IR** (neat):  $\nu_{\max} = 3488, 2929, 1753, 1736, 1663, 1181, 1154,$

1026, 958, 769, 742  $\text{cm}^{-1}$ ; **HRMS** (ESI): exact mass calculated for:  $\text{C}_{19}\text{H}_{18}\text{O}_6\text{Na}$   $[\text{M}+\text{Na}]^+$ : 365.0996, found: 365.0987. The spectroscopic data were identical with those reported in the literature.<sup>16</sup>

## 9. Comparison of Natural Products with Synthetic 19-nor-Clerodane Diterpenoids

### 1) (+)-Teucvin (1)

Natural product:  $[\alpha]_D^{25} = +68$  ( $c = 0.15$ ,  $\text{CHCl}_3$ );<sup>7</sup>

Synthetic product:  $[\alpha]_D^{23} = +177.46$  ( $c = 1.05$ ,  $\text{CHCl}_3$ ).

**Table S3**  $^1\text{H}$  NMR Data of (+)-Teucvin (1)

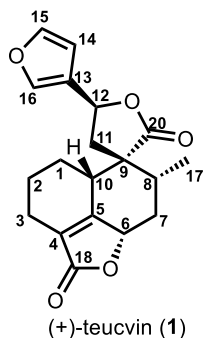

| Carbon No. | This work<br>( $\text{CDCl}_3$ , 400 MHz) | Natural (ref. 7)<br>( $\text{CDCl}_3$ , 400 MHz) | $\Delta\delta$ (ppm) |
|------------|-------------------------------------------|--------------------------------------------------|----------------------|
| 1a         | 2.28–2.08 (m)                             | 2.20 (m)                                         |                      |
| 1b         | 1.58–1.39 (m)                             | 1.45 (m)                                         |                      |
| 2a         | 2.01–1.98 (m)                             | 1.98 (m)                                         |                      |
| 2b         | 1.58–1.39 (m)                             | 1.54 (m)                                         |                      |
| 3a         | 2.28–2.08 (m)                             | 2.20 (m)                                         |                      |
| 3b         | 2.28–2.08 (m)                             | 2.15 (m)                                         |                      |
| 6          | 4.76 (t, 8.8 Hz)                          | 4.74 (dd, 9.8, 8.0 Hz)                           | +0.02                |
| 7          | 2.28–2.08 (m)                             | 2.20 (m)                                         |                      |
| 8          | 1.93–1.86 (m)                             | 1.86 (m)                                         |                      |
| 10         | 2.69 (br)                                 | 2.66 (m)                                         | +0.03                |
| 11         | 2.55 (d, 8.8 Hz)                          | 2.53 (d, 8.5 Hz)                                 | +0.02                |
| 12         | 5.44 (t, 8.4 Hz)                          | 5.43 (dd, 8.5, 8.5 Hz)                           | +0.01                |
| 14         | 6.38 (s)                                  | 6.37 (br s)                                      | +0.01                |
| 15         | 7.45 (s)                                  | 7.44 (br s)                                      | +0.01                |
| 16         | 7.44 (s)                                  | 7.44 (br s)                                      | 0.00                 |
| 17         | 1.05 (d, 6.8 Hz)                          | 1.05 (d, 6.7 Hz)                                 | 0.00                 |

**Table S4**  $^{13}\text{C}$  NMR Data of (+)-Teucvin (**1**)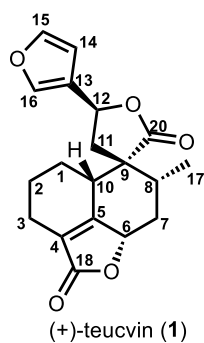

| Carbon No. | This work<br>(CDCl <sub>3</sub> , 100 MHz) | Natural (ref. 7)<br>(CDCl <sub>3</sub> , 100 MHz) | $\Delta\delta$ (ppm) |
|------------|--------------------------------------------|---------------------------------------------------|----------------------|
| 1          | 24.8                                       | 24.8                                              | 0.0                  |
| 2          | 21.7                                       | 21.7                                              | 0.0                  |
| 3          | 19.6                                       | 19.6                                              | 0.0                  |
| 4          | 126.6                                      | 126.6                                             | 0.0                  |
| 5          | 161.3                                      | 161.3                                             | 0.0                  |
| 6          | 78.2                                       | 78.2                                              | 0.0                  |
| 7          | 35.2                                       | 35.3                                              | -0.1                 |
| 8          | 36.0                                       | 36.0                                              | 0.0                  |
| 9          | 53.5                                       | 53.5                                              | 0.0                  |
| 10         | 42.1                                       | 42.1                                              | 0.0                  |
| 11         | 40.9                                       | 40.9                                              | 0.0                  |
| 12         | 71.7                                       | 71.8                                              | -0.1                 |
| 13         | 124.9                                      | 125.0                                             | -0.1                 |
| 14         | 107.9                                      | 107.9                                             | 0.0                  |
| 15         | 144.3                                      | 144.3                                             | 0.0                  |
| 16         | 139.5                                      | 139.5                                             | 0.0                  |
| 17         | 17.0                                       | 17.0                                              | 0.0                  |
| 18         | 172.9                                      | 172.9                                             | 0.0                  |
| 20         | 175.5                                      | 175.5                                             | 0.0                  |

## 2) (+)-Montanin A (3)

Natural product:  $[\alpha]_D^{21} = +120.2$  ( $c = 0.32$ ,  $\text{CHCl}_3$ );<sup>8</sup>

Synthetic product:  $[\alpha]_D^{16} = +103.26$  ( $c = 0.31$ ,  $\text{CHCl}_3$ ).

**Table S5** <sup>1</sup>H NMR Data of (+)-Montanin A (3)

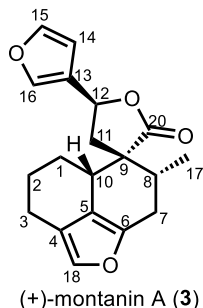

| Carbon No. | This work<br>( $\text{CDCl}_3$ , 400 MHz) | Liu (ref. 9)<br>( $\text{CDCl}_3$ , 400 MHz) | Natural (ref. 10)<br>( $\text{CDCl}_3$ , 400 MHz) | $\Delta\delta$ (ppm)<br>(our synthetic–<br>natural) |
|------------|-------------------------------------------|----------------------------------------------|---------------------------------------------------|-----------------------------------------------------|
| 1a         | 1.30–1.24 (m)                             |                                              | 1.23 (dddd)                                       |                                                     |
| 1b         | 2.15–2.05 (m)                             | 2.17–2.05 (m)                                | 2.10 (m)                                          |                                                     |
| 2a         | 2.15–2.05 (m)                             | 2.17–2.05 (m)                                | 2.08 (m)                                          |                                                     |
| 2b         | 1.71–1.58 (m)                             |                                              | 1.63 (dddd)                                       |                                                     |
| 3a         | 2.52–2.39 (m)                             | 2.69–2.38 (m)                                | 2.42 (dddd)                                       |                                                     |
| 3b         | 2.69 (dd, 16.4, 6.0)                      | 2.69–2.38 (m)                                | 2.68 (br dd)                                      | +0.01                                               |
| 7          | 2.88–2.75 (m)                             | 2.78 (m)                                     | 2.80 (m)                                          |                                                     |
| 8          | 2.31–2.21 (m)                             | 2.28–2.21 (m)                                | 2.25 (ddq)                                        |                                                     |
| 10         | 2.88–2.75 (m)                             | 2.78 (m)                                     | 2.76 (m)                                          |                                                     |
| 11a        | 2.49 (dd, 8.4, 13.6 Hz)                   | 2.69–2.38 (m)                                | 2.48 (dd)                                         | +0.01                                               |
| 11b        | 2.62 (dd, 8.8, 13.6 Hz)                   | 2.69–2.38 (m)                                | 2.61 (dd)                                         | +0.01                                               |
| 12         | 5.44 (t, 8.8 Hz)                          | 5.42 (t, 8.5 Hz)                             | 5.43 (br t)                                       | +0.01                                               |
| 14         | 6.41 (br)                                 | 6.39 (m)                                     | 6.40 (dd)                                         | +0.01                                               |
| 15         | 7.44 (t, 2.0 Hz)                          | 7.42 (m)                                     | 7.43 (t)                                          | +0.01                                               |
| 16         | 7.47 (s)                                  | 7.45 (s)                                     | 7.46 (dt)                                         | +0.01                                               |
| 17         | 1.15 (d, 6.8 Hz)                          | 1.13 (d, 6.8 Hz)                             | 1.14 (d)                                          | +0.01                                               |
| 18         | 7.06 (s)                                  | 7.04 (br s)                                  | 7.05 (td)                                         | +0.01                                               |

**Table S6**  $^{13}\text{C}$  NMR Data of (+)-Montanin A (**3**)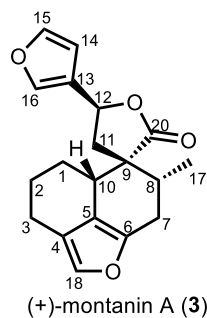

| Carbon No. | This work<br>( $\text{CDCl}_3$ , 100 MHz) | Liu (ref. 9)<br>( $\text{CDCl}_3$ , 100 MHz) | Natural (ref. 10)<br>( $\text{CDCl}_3$ , 100 MHz) | $\Delta\delta$ (ppm)<br>(our synthetic–<br>natural) |
|------------|-------------------------------------------|----------------------------------------------|---------------------------------------------------|-----------------------------------------------------|
| 1          | 25.6                                      | 25.6                                         | 25.6                                              | 0.0                                                 |
| 2          | 23.9                                      | 23.9                                         | 23.9                                              | 0.0                                                 |
| 3          | 19.1                                      | 19.1                                         | 19.1                                              | 0.0                                                 |
| 4          | 119.7                                     | 119.7                                        | 119.7                                             | 0.0                                                 |
| 5          | 116.9                                     | 116.9                                        | 116.9                                             | 0.0                                                 |
| 6          | 147.9                                     | 147.9                                        | 147.9                                             | 0.0                                                 |
| 7          | 30.0                                      | 30.0                                         | 30.0                                              | 0.0                                                 |
| 8          | 36.1                                      | 36.1                                         | 36.1                                              | 0.0                                                 |
| 9          | 50.7                                      | 50.7                                         | 50.7                                              | 0.0                                                 |
| 10         | 43.2                                      | 43.2                                         | 43.2                                              | 0.0                                                 |
| 11         | 39.7                                      | 39.7                                         | 39.7                                              | 0.0                                                 |
| 12         | 71.6                                      | 71.6                                         | 71.6                                              | 0.0                                                 |
| 13         | 125.5                                     | 125.5                                        | 125.5                                             | 0.0                                                 |
| 14         | 108.1                                     | 108.1                                        | 108.1                                             | 0.0                                                 |
| 15         | 144.1                                     | 144.1                                        | 144.1                                             | 0.0                                                 |
| 16         | 139.6                                     | 139.6                                        | 139.6                                             | 0.0                                                 |
| 17         | 17.8                                      | 17.7                                         | 17.7                                              | +0.1                                                |
| 18         | 136.2                                     | 136.2                                        | 136.1                                             | +0.1                                                |
| 20         | 175.5                                     | 175.5                                        | 175.5                                             | 0.0                                                 |

### 3) (+)-Cracrosone A (4)

Natural product:  $[\alpha]_D^{25} = +27$  ( $c = 1.0$ , MeOH);<sup>11</sup>

Synthetic product:  $[\alpha]_D^{28} = +25.35$  ( $c = 0.43$ , MeOH).

**Table S7** <sup>1</sup>H NMR Data of (+)-Cracrosone A (4)

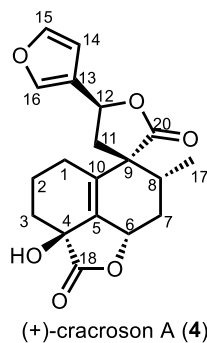

| Carbon No. | This work<br>(CDCl <sub>3</sub> , 400 MHz) | Natural (ref. 11)<br>(CDCl <sub>3</sub> , 400 MHz) | $\Delta\delta$ (ppm) |
|------------|--------------------------------------------|----------------------------------------------------|----------------------|
| 1a         | 2.19–1.95 (m)                              | 2.00 (m)                                           |                      |
| 1b         | 2.41–2.37 (m)                              | 2.37 (dd, 14.0, 9.2 Hz)                            |                      |
| 2a         | 1.53–1.46 (m)                              | 1.48 (dt, 14.0, 2.8 Hz)                            |                      |
| 2b         | 2.19–1.95 (m)                              | 2.08 (m)                                           |                      |
| 3a         | 2.19–1.95 (m)                              | 1.95 (m)                                           |                      |
| 3b         | 2.19–1.95 (m)                              | 2.21 (m)                                           |                      |
| 6          | 5.14 (t, 8.0 Hz)                           | 5.14 (t, 7.6 Hz)                                   | 0.00                 |
| 7          | 2.19–1.95 (m)                              | 2.12 (m)                                           |                      |
| 8          | 1.87–1.78 (m)                              | 1.82 (m)                                           |                      |
| 11a        | 2.30 (dd, 14.0, 9.2 Hz)                    | 2.29 (dd, 14.0, 9.2 Hz)                            | +0.01                |
| 11b        | 2.74 (dd, 14.0, 8.4 Hz)                    | 2.73 (dd, 14.0, 8.4 Hz)                            | +0.01                |
| 12         | 5.50 (t, 8.8 Hz)                           | 5.49 (t, 8.4 Hz)                                   | +0.01                |
| 14         | 6.42 (s)                                   | 6.42 (s)                                           | 0.00                 |
| 15         | 7.47 (s)                                   | 7.46 (s)                                           | +0.01                |
| 16         | 7.50 (s)                                   | 7.49 (s)                                           | +0.01                |
| 17         | 1.14 (d, 6.8 Hz)                           | 1.14 (d, 7.6 Hz)                                   | 0.00                 |
| -OH        | 2.59 (br s)                                | 3.48 (s)                                           | -0.89                |



**Table S8**  $^{13}\text{C}$  NMR Data of (+)-Cracrosone A (**4**)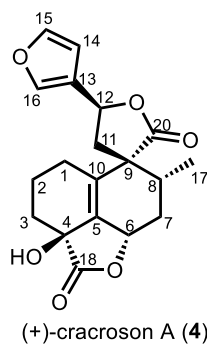

| Carbon No. | This work<br>( $\text{CDCl}_3$ , 100 MHz) | Natural (ref. 11)<br>( $\text{CDCl}_3$ , 100 MHz) | $\Delta\delta$ (ppm) |
|------------|-------------------------------------------|---------------------------------------------------|----------------------|
| 1          | 24.9                                      | 25.1                                              | -0.2                 |
| 2          | 29.8                                      | 29.9                                              | -0.1                 |
| 3          | 17.2                                      | 17.3                                              | -0.1                 |
| 4          | 69.1                                      | 69.2                                              | -0.1                 |
| 5          | 137.4                                     | 137.4                                             | 0.0                  |
| 6          | 76.9                                      | 77.0                                              | -0.1                 |
| 7          | 32.5                                      | 32.6                                              | -0.1                 |
| 8          | 34.9                                      | 35.1                                              | -0.2                 |
| 9          | 52.5                                      | 52.7                                              | -0.2                 |
| 10         | 132.8                                     | 133.1                                             | -0.3                 |
| 11         | 39.5                                      | 39.7                                              | -0.2                 |
| 12         | 72.5                                      | 72.7                                              | -0.2                 |
| 13         | 124.4                                     | 124.6                                             | -0.2                 |
| 14         | 108.0                                     | 108.1                                             | -0.1                 |
| 15         | 144.3                                     | 144.5                                             | -0.2                 |
| 16         | 139.7                                     | 139.9                                             | -0.2                 |
| 17         | 16.1                                      | 16.2                                              | -0.1                 |
| 18         | 175.9                                     | 176.1                                             | -0.2                 |
| 20         | 176.0                                     | 176.2                                             | -0.2                 |

#### 4) (+)-Teucvisin C (5)

Natural product:  $[\alpha]_D^{25} = +176.4$  ( $c = 0.11$ , MeOH);<sup>12</sup>

Synthetic product:  $[\alpha]_D^{23} = +176.92$  ( $c = 0.10$ , MeOH).

**Table S9** <sup>1</sup>H NMR Data of (+)-Teucvisin C (5)

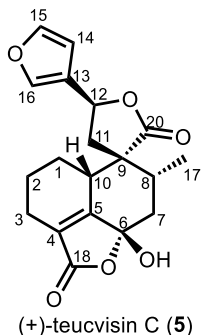

| Carbon No. | This work<br>(CDCl <sub>3</sub> , 400 MHz) | Natural (ref. 12)<br>(CDCl <sub>3</sub> , 500 MHz) | $\Delta\delta$<br>(ppm) |
|------------|--------------------------------------------|----------------------------------------------------|-------------------------|
| 1a         | 2.27–2.09 (m)                              | 2.33 (m)                                           |                         |
| 1b         | 1.50–1.41 (m)                              | 1.48 (m)                                           |                         |
| 2a         | 2.01–1.96 (m)                              | 1.98 (m)                                           |                         |
| 2b         | 1.59–1.51 (m)                              | 1.54 (m)                                           |                         |
| 3a         | 2.27–2.09 (m)                              | 2.19 (m)                                           |                         |
| 3b         | 2.27–2.09 (m)                              | 2.27 (m)                                           |                         |
| 7a         | 2.47 (t, 12.4 Hz)                          | 2.50 (t, 13.0 Hz)                                  | –0.03                   |
| 7b         | 2.27–2.09 (m)                              | 2.15 (dd, 13.0, 4.0 Hz)                            |                         |
| 8          | 2.27–2.09 (m)                              | 2.22 (m)                                           |                         |
| 10         | 2.87–2.82 (m)                              | 2.83 (m)                                           |                         |
| 11a        | 2.59–2.53 (m)                              | 2.58 (dd, 14.0, 8.5 Hz)                            |                         |
| 11b        | 2.59–2.53 (m)                              | 2.54 (dd, 14.0, 8.5 Hz)                            |                         |
| 12         | 5.45 (t, 8.4 Hz)                           | 5.44 (t, 8.5 Hz)                                   | +0.01                   |
| 14         | 6.40 (s)                                   | 6.39 (s)                                           | +0.01                   |
| 15         | 7.46 (s)                                   | 7.46 (s)                                           | 0.00                    |
| 16         | 7.45 (t, 1.6 Hz)                           | 7.45 (s)                                           | 0.00                    |
| 17         | 1.04 (d, 6.4 Hz)                           | 1.04 (d, 7.0 Hz)                                   | 0.00                    |
| -OH        | 3.71 (br s)                                | 3.37 (br s)                                        | +0.34                   |

**Table S10**  $^{13}\text{C}$  NMR Data of (+)-Teucvisin C (**5**)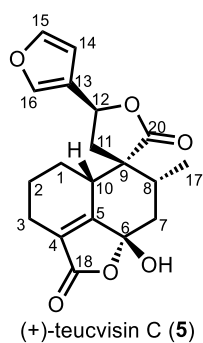

| Carbon No. | This work<br>(CDCl <sub>3</sub> , 100 MHz) | Natural (ref. 12)<br>(CDCl <sub>3</sub> , 125 MHz) | $\Delta\delta$ (ppm) |
|------------|--------------------------------------------|----------------------------------------------------|----------------------|
| 1          | 24.5                                       | 24.7                                               | -0.2                 |
| 2          | 21.4                                       | 21.6                                               | -0.2                 |
| 3          | 19.4                                       | 19.6                                               | -0.2                 |
| 4          | 128.4                                      | 128.7                                              | -0.3                 |
| 5          | 159.8                                      | 159.7                                              | +0.1                 |
| 6          | 102.2                                      | 102.1                                              | +0.1                 |
| 7          | 39.8                                       | 40.1                                               | -0.3                 |
| 8          | 35.8                                       | 36.0                                               | -0.2                 |
| 9          | 54.0                                       | 54.2                                               | -0.2                 |
| 10         | 40.2                                       | 40.4                                               | -0.2                 |
| 11         | 40.6                                       | 40.8                                               | -0.2                 |
| 12         | 72.0                                       | 72.1                                               | -0.1                 |
| 13         | 124.8                                      | 125.1                                              | -0.3                 |
| 14         | 108.0                                      | 108.1                                              | -0.1                 |
| 15         | 144.3                                      | 144.4                                              | -0.1                 |
| 16         | 139.6                                      | 139.7                                              | -0.1                 |
| 17         | 16.6                                       | 16.8                                               | -0.2                 |
| 18         | 170.8                                      | 170.5                                              | +0.3                 |
| 20         | 175.8                                      | 175.8                                              | 0.0                  |

### 5) (+)-Teucrin A (6)

Natural product:  $[\alpha]_D^{20} = +190.0$  ( $c = 0.38$ , pyridine);<sup>13</sup>

Synthetic product:  $[\alpha]_D^{31} = +91.03$  ( $c = 0.11$ ,  $\text{CHCl}_3$ ).

**Table S11**  $^1\text{H}$  NMR Data of (+)-Teucrin A (6)

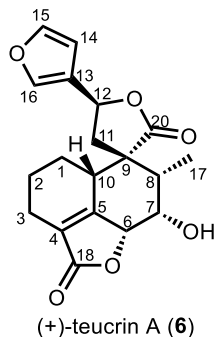

| Carben No. | This work (DMSO, 400 MHz)  | Natural (ref. 14) (DMSO, 400 MHz) | $\Delta\delta$ (ppm) |
|------------|----------------------------|-----------------------------------|----------------------|
| 1a         | 1.56–1.45 (m)              |                                   |                      |
| 1b         | 2.03–1.86 (m)              | 1.90–1.88 (m)                     |                      |
| 2a         | 2.03–1.86 (m)              | 1.98–1.93 (m)                     |                      |
| 2b         | 2.12–2.08 (m)              | 2.16–2.12 (m)                     |                      |
| 3a         | 1.31–1.27 (m)              |                                   |                      |
| 3b         | 2.37–2.30 (m)              | 2.34–2.33 (m)                     |                      |
| 6          | 5.01–5.00 (m)              | 5.02 (m)                          | –0.01                |
| 7          | 4.02 (ddd, 10.8, 4.4, 2.4) | 4.03 (dd, 10.8, 2.4)              | –0.01                |
| 8          | 2.24–2.16 (m)              | 2.26–2.19 (m)                     |                      |
| 10         | 3.09–3.05 (m)              | 3.08 (m)                          |                      |
| 11a        | 2.73 (dd, 14.0, 8.0)       | 2.73 (dd, 14.0, 8.0)              | 0.00                 |
| 11b        | 2.63 (dd, 14.0, 9.6)       | 2.64 (dd, 14.0, 9.6)              | –0.01                |
| 12         | 5.78 (t, 8.4)              | 5.79 (t, 8.4)                     | –0.01                |
| 14         | 6.59 (d, 0.8)              | 6.60 (d, 0.8)                     | –0.01                |
| 15         | 7.75 (s)                   | 7.76 (s)                          | –0.01                |
| 16         | 7.90 (s)                   | 7.92 (s)                          | –0.02                |
| 17         | 1.12 (d, 7.8)              |                                   |                      |
| -OH        | 4.54 (d, 10.8)             | 4.57 (d, 10.8)                    | –0.03                |

**Table S12**  $^{13}\text{C}$  NMR Data of (+)-Teucrin A (**6**)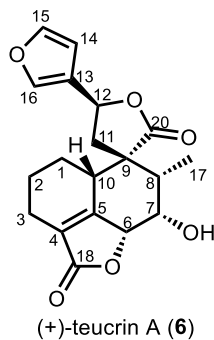

| Carben No. | This work (DMSO, 100 MHz) | Natural (ref. 14) (DMSO, 100 MHz) | $\Delta\delta$ (ppm) |
|------------|---------------------------|-----------------------------------|----------------------|
| 1          | 21.2                      | 21.7                              | -0.5                 |
| 2          | 19.2                      | 19.6                              | -0.4                 |
| 3          | 24.1                      | 24.6                              | -0.5                 |
| 4          | 126.6                     | 127.1                             | -0.5                 |
| 5          | 159.3                     | 159.8                             | -0.5                 |
| 6          | 80.2                      | 80.7                              | -0.5                 |
| 7          | 71.4                      | 71.9                              | -0.5                 |
| 8          | 37.5                      | 38.0                              | -0.5                 |
| 9          | 56.2                      | 56.7                              | -0.5                 |
| 10         | 40.9                      | 41.3                              | -0.4                 |
| 11         | 41.0                      | 41.4                              | -0.4                 |
| 12         | 74.4                      | 74.9                              | -0.5                 |
| 13         | 123.8                     | 124.3                             | -0.5                 |
| 14         | 108.7                     | 109.2                             | -0.5                 |
| 15         | 144.7                     | 145.2                             | -0.5                 |
| 16         | 141.3                     | 141.8                             | -0.5                 |
| 17         | 13.4                      | 13.9                              | -0.5                 |
| 18         | 172.6                     | 173.2                             | -0.6                 |
| 20         | 180.5                     | 181.1                             | -0.6                 |

**6) (+)-Cracrosone E (7)**

Natural product:  $[\alpha]_D^{25} = +112$  ( $c = 1.0$ , MeOH);<sup>15</sup>

Synthetic product:  $[\alpha]_D^{23} = +95.79$  ( $c = 0.20$ , MeOH).

**Table S13** <sup>1</sup>H NMR Data of (+)-Cracrosone E (7)

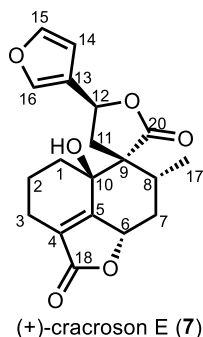

| Carbon No. | This work<br>(CDCl <sub>3</sub> , 400 MHz) | Natural (ref. 15)<br>(CDCl <sub>3</sub> , 400 MHz) | $\Delta\delta$<br>(ppm) |
|------------|--------------------------------------------|----------------------------------------------------|-------------------------|
| 1a         | 2.14–2.03 (m)                              | 2.08 (m)                                           |                         |
| 1b         | 1.68–1.62 (m)                              | 1.67 (m)                                           |                         |
| 2a         | 2.35–2.29 (m)                              | 2.25 (m)                                           |                         |
| 2b         | 2.14–2.03 (m)                              | 2.06 (m)                                           |                         |
| 3a         | 1.98–1.93 (m)                              | 1.94 (m)                                           |                         |
| 3b         | 1.76–1.62 (m)                              | 1.68 (m)                                           |                         |
| 6          | 5.09–5.03 (m)                              | 5.07 (m)                                           |                         |
| 7a         | 2.27–2.17 (m)                              | 2.20 (m)                                           |                         |
| 7b         | 2.27–2.17 (m)                              | 2.24 (m)                                           |                         |
| 8          | 2.27–2.17 (m)                              | 2.18 (m)                                           |                         |
| 11a        | 3.23 (dd, 14.8, 8.8 Hz)                    | 3.24 (dd, 14.8, 8.6 Hz)                            | –0.01                   |
| 11b        | 2.26 (dd, 14.8, 8.4 Hz)                    | 2.28 (m)                                           | –0.02                   |
| 12         | 5.44 (t, 8.4 Hz)                           | 5.44 (t, 8.6 Hz)                                   | 0.00                    |
| 14         | 6.40 (s)                                   | 6.40 (dd, 1.7, 0.8 Hz)                             | 0.00                    |
| 15         | 7.45 (t, 1.6 Hz)                           | 7.45 (t, 1.7 Hz)                                   | 0.00                    |
| 16         | 7.46 (s)                                   | 7.46 (m)                                           | 0.00                    |
| 17         | 1.02 (d, 6.0 Hz)                           | 1.01 (d, 6.5 Hz)                                   | +0.01                   |
| -OH        | 2.59 (br s)                                |                                                    |                         |

**Table S14**  $^{13}\text{C}$  NMR Data of (+)-Cracoson E (**7**)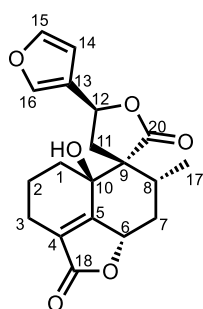**(+)-cracoson E (7)**

| <b>Carbon No.</b> | <b>This work</b><br>(CDCl <sub>3</sub> , 100 MHz) | <b>Natural (ref. 15)</b><br>(CDCl <sub>3</sub> , 100 MHz) | <b><math>\Delta\delta</math></b><br>(ppm) |
|-------------------|---------------------------------------------------|-----------------------------------------------------------|-------------------------------------------|
| 1                 | 33.8                                              | 33.6                                                      | +0.2                                      |
| 2                 | 20.0                                              | 19.8                                                      | +0.2                                      |
| 3                 | 19.4                                              | 19.2                                                      | +0.2                                      |
| 4                 | 128.6                                             | 128.1                                                     | +0.5                                      |
| 5                 | 160.9                                             | 161.4                                                     | -0.5                                      |
| 6                 | 77.1                                              | 77.3                                                      | -0.2                                      |
| 7                 | 35.3                                              | 35.3                                                      | 0.0                                       |
| 8                 | 32.5                                              | 32.3                                                      | +0.2                                      |
| 9                 | 58.9                                              | 58.9                                                      | 0.0                                       |
| 10                | 69.4                                              | 69.2                                                      | +0.2                                      |
| 11                | 34.8                                              | 34.6                                                      | +0.2                                      |
| 12                | 72.2                                              | 72.2                                                      | 0.0                                       |
| 13                | 125.0                                             | 124.9                                                     | +0.1                                      |
| 14                | 108.0                                             | 107.9                                                     | +0.1                                      |
| 15                | 144.2                                             | 144.1                                                     | +0.1                                      |
| 16                | 139.5                                             | 139.4                                                     | +0.1                                      |
| 17                | 17.2                                              | 17.1                                                      | +0.1                                      |
| 18                | 172.8                                             | 173.2                                                     | -0.4                                      |
| 20                | 175.5                                             | 175.7                                                     | -0.2                                      |

7) (+)-2-Hydroxyteuscorolide A (**8**)

Natural product:  $[\alpha]_D^{25} = +20.8$  ( $c = 0.260$ ,  $\text{CHCl}_3:\text{C}_5\text{H}_5\text{N} = 9:1$ );<sup>16</sup>

Synthetic product:  $[\alpha]_D^{25} = +10.40$  ( $c = 0.20$ ,  $\text{CHCl}_3:\text{C}_5\text{H}_5\text{N} = 9:1$ ).

**Table S15** <sup>1</sup>H NMR Data of (+)-2-Hydroxyteuscorolide A (**8**)

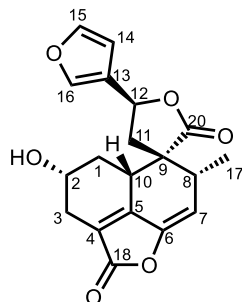

(+)-2-hydroxyteuscorolide A (**8**)

| Carbon No. | This work<br>(pyridine-d <sub>5</sub> , 400 MHz) | Natural (ref. 16)<br>(pyridine-d <sub>5</sub> , 90 MHz) | $\Delta\delta$<br>(ppm) |
|------------|--------------------------------------------------|---------------------------------------------------------|-------------------------|
| 1a         | 1.86 (dd, 22.8, 11.6 Hz)                         | 1.77 (t, 10.0 Hz)                                       | +0.09                   |
| 1b         |                                                  |                                                         |                         |
| 2          | 4.43–4.34 (m)                                    | 4.33 (m)                                                |                         |
| 3a         |                                                  |                                                         |                         |
| 3b         |                                                  |                                                         |                         |
| 7          | 5.46 (d, 2.0 Hz)                                 | 5.40 (d, 1.5 Hz)                                        | +0.06                   |
| 8          |                                                  |                                                         |                         |
| 10         |                                                  |                                                         |                         |
| 11a        | 2.69 (dd, 14.0, 8.0 Hz)                          | 2.70 (dd, 13.5, 8.5 Hz)                                 | -0.01                   |
| 11b        | 2.55 (dd, 14.0, 9.2 Hz)                          | 2.50 (dd, 13.5, 8.5 Hz)                                 | +0.05                   |
| 12         | 5.62 (t, 8.4 Hz)                                 | 5.53 (t, 8.5 Hz)                                        | +0.09                   |
| 14         | 6.61 (s)                                         | 6.55 (m)                                                | +0.06                   |
| 15         | 7.71 (t, 2.0 Hz)                                 | 7.63 (t, 1.5 Hz)                                        | +0.08                   |
| 16         | 7.81 (s)                                         | 7.73 (m)                                                | +0.08                   |
| 17         | 1.23 (d, 7.2 Hz)                                 | 1.23 (d, 7.5 Hz)                                        | 0.00                    |



**Table S16**  $^{13}\text{C}$  NMR Data of (+)-2-Hydroxyteuscorolide A (**8**)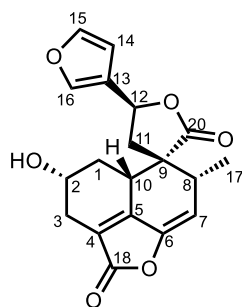**(+)-2-hydroxyteuscorolide A (8)**

| <b>Carbon No.</b> | <b>This work</b><br>(pyridine- $d_5$ , 100 MHz) | <b>Natural (ref. 16)</b><br>(pyridine- $d_5$ , 20.15 MHz) | $\Delta\delta$<br>(ppm) |
|-------------------|-------------------------------------------------|-----------------------------------------------------------|-------------------------|
| 1                 | 34.6                                            | 34.7                                                      | -0.1                    |
| 2                 | 67.5                                            | 67.7                                                      | -0.2                    |
| 3                 | 30.1                                            | 30.3                                                      | -0.2                    |
| 4                 | 122.8                                           | 123.0                                                     | -0.2                    |
| 5                 | 151.3                                           | 151.4                                                     | -0.1                    |
| 6                 | 147.2                                           | 147.3                                                     | -0.1                    |
| 7                 | 109.1                                           | 109.2                                                     | -0.1                    |
| 8                 | 37.7                                            | 37.9                                                      | -0.2                    |
| 9                 | 53.7                                            | 53.9                                                      | -0.2                    |
| 10                | 40.1                                            | 40.3                                                      | -0.2                    |
| 11                | 39.0                                            | 39.2                                                      | -0.2                    |
| 12                | 71.7                                            | 72.0                                                      | -0.3                    |
| 13                | 125.5                                           | 125.7                                                     | -0.2                    |
| 14                | 108.8                                           | 108.9                                                     | -0.1                    |
| 15                | 144.7                                           | 144.8                                                     | -0.1                    |
| 16                | 140.6                                           | 140.7                                                     | -0.1                    |
| 17                | 16.7                                            | 16.9                                                      | -0.2                    |
| 18                | 169.1                                           | 169.1                                                     | 0.0                     |
| 20                | 175.1                                           | 175.2                                                     | -0.1                    |

## 10. X-ray Crystallographic Data of 25, (+)-Cracrosone E (7) and 38

### 1) X-ray structure of 25 (CCDC 2274928)

The sample of **25** was prepared by recrystallization in petroleum ether/ethyl acetate.

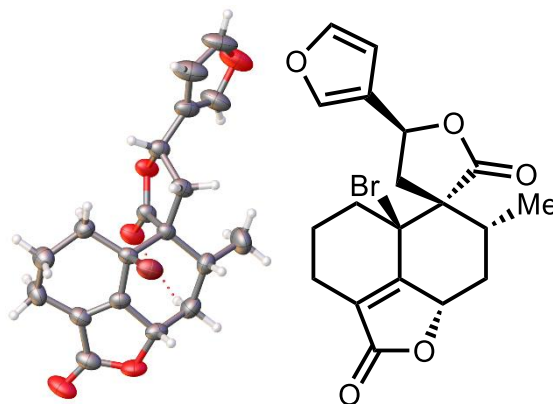

**Table 1. Crystal data and structure refinement for 25.**

|                                   |                                                  |                             |
|-----------------------------------|--------------------------------------------------|-----------------------------|
| Identification code               | mo_d8v23026_0m                                   |                             |
| Empirical formula                 | C <sub>19</sub> H <sub>19</sub> BrO <sub>5</sub> |                             |
| Formula weight                    | 407.25                                           |                             |
| Temperature                       | 213(2) K                                         |                             |
| Wavelength                        | 0.71073 Å                                        |                             |
| Crystal system                    | Monoclinic                                       |                             |
| Space group                       | P 21                                             |                             |
| Unit cell dimensions              | a = 6.7480(7) Å                                  | $\alpha = 90^\circ$ .       |
|                                   | b = 13.0022(13) Å                                | $\beta = 96.872(3)^\circ$ . |
|                                   | c = 10.0405(11) Å                                | $\gamma = 90^\circ$ .       |
| Volume                            | 874.61(16) Å <sup>3</sup>                        |                             |
| Z                                 | 2                                                |                             |
| Density (calculated)              | 1.546 Mg/m <sup>3</sup>                          |                             |
| Absorption coefficient            | 2.377 mm <sup>-1</sup>                           |                             |
| F(000)                            | 416                                              |                             |
| Crystal size                      | 0.200 x 0.150 x 0.100 mm <sup>3</sup>            |                             |
| Theta range for data collection   | 2.575 to 25.999° .                               |                             |
| Index ranges                      | -8<=h<=8, -16<=k<=16, -12<=l<=12                 |                             |
| Reflections collected             | 15392                                            |                             |
| Independent reflections           | 3412 [R(int) = 0.0553]                           |                             |
| Completeness to theta = 25.242°   | 99.90%                                           |                             |
| Absorption correction             | Semi-empirical from equivalents                  |                             |
| Max. and min. transmission        | 0.7456 and 0.4722                                |                             |
| Refinement method                 | Full-matrix least-squares on F <sup>2</sup>      |                             |
| Data / restraints / parameters    | 3412 / 1 / 228                                   |                             |
| Goodness-of-fit on F <sup>2</sup> | 1.017                                            |                             |
| Final R indices [I>2sigma(I)]     | R1 = 0.0314, wR2 = 0.0782                        |                             |
| R indices (all data)              | R1 = 0.0366, wR2 = 0.0816                        |                             |
| Absolute structure parameter      | 0.076(6)                                         |                             |
| Extinction coefficient            | 0.015(3)                                         |                             |
| Largest diff. peak and hole       | 0.505 and -0.319 e.Å <sup>-3</sup>               |                             |

**Table 2. Atomic coordinates ( $\times 10^4$ ) and equivalent isotropic displacement parameters ( $\text{\AA}^2 \times 10^3$ ) for 26.  $U(\text{eq})$  is defined as one third of the trace of the orthogonalized  $U_{ij}$  tensor.**

| Atom  | x        | y       | z        | $U(\text{eq})$ |
|-------|----------|---------|----------|----------------|
| Br(1) | 7396(1)  | 6761(1) | 4032(1)  | 46(1)          |
| O(1)  | 7846(6)  | 3179(3) | 7616(4)  | 62(1)          |
| O(2)  | 8837(5)  | 3494(3) | 5598(4)  | 50(1)          |
| O(3)  | 3237(5)  | 3574(3) | 3245(3)  | 45(1)          |
| O(4)  | 1603(5)  | 4719(3) | 1913(3)  | 42(1)          |
| O(5)  | -400(7)  | 5573(4) | -2042(4) | 75(1)          |
| C(1)  | 7650(7)  | 3673(4) | 6583(5)  | 45(1)          |
| C(2)  | 6239(7)  | 4502(4) | 6157(5)  | 39(1)          |
| C(3)  | 4628(9)  | 4930(4) | 6871(5)  | 50(1)          |
| C(4)  | 4061(9)  | 5986(4) | 6270(5)  | 50(1)          |
| C(5)  | 3679(7)  | 5945(4) | 4740(5)  | 42(1)          |
| C(6)  | 5499(6)  | 5575(3) | 4099(4)  | 31(1)          |
| C(7)  | 6645(6)  | 4813(3) | 4960(4)  | 33(1)          |
| C(8)  | 8336(6)  | 4238(4) | 4525(5)  | 40(1)          |
| C(9)  | 7725(7)  | 3751(4) | 3182(5)  | 45(1)          |
| C(10) | 6786(7)  | 4542(4) | 2163(5)  | 41(1)          |
| C(11) | 4990(6)  | 5137(3) | 2657(4)  | 32(1)          |
| C(12) | 3251(6)  | 4381(3) | 2671(4)  | 35(1)          |
| C(13) | 4102(7)  | 5960(4) | 1643(5)  | 40(1)          |
| C(14) | 1848(6)  | 5784(4) | 1472(5)  | 38(1)          |
| C(15) | 817(7)   | 5890(4) | 91(5)    | 45(1)          |
| C(16) | 579(10)  | 5176(5) | -882(6)  | 64(2)          |
| C(17) | -765(9)  | 6559(5) | -1771(6) | 70(2)          |
| C(18) | -40(8)   | 6783(6) | -499(6)  | 71(2)          |
| C(19) | 6195(11) | 3993(6) | 808(5)   | 66(2)          |

**Table 3. Bond lengths [ $\text{\AA}$ ] and angles [ $^\circ$ ] for 25.**

|            |          |
|------------|----------|
| Br(1)-C(6) | 2.010(4) |
| O(1)-C(1)  | 1.214(6) |
| O(2)-C(1)  | 1.365(7) |
| O(2)-C(8)  | 1.458(5) |
| O(3)-C(12) | 1.197(6) |
| O(4)-C(12) | 1.344(5) |
| O(4)-C(14) | 1.470(5) |
| O(5)-C(17) | 1.338(8) |
| O(5)-C(16) | 1.369(7) |
| C(1)-C(2)  | 1.468(7) |
| C(2)-C(7)  | 1.327(6) |
| C(2)-C(3)  | 1.481(7) |
| C(3)-C(4)  | 1.529(7) |
| C(3)-H(3A) | 0.98     |
| C(3)-H(3B) | 0.98     |
| C(4)-C(5)  | 1.529(7) |

|              |          |
|--------------|----------|
| C(4)-H(4A)   | 0.98     |
| C(4)-H(4B)   | 0.98     |
| C(5)-C(6)    | 1.530(6) |
| C(5)-H(5A)   | 0.98     |
| C(5)-H(5B)   | 0.98     |
| C(6)-C(7)    | 1.472(6) |
| C(6)-C(11)   | 1.556(6) |
| C(7)-C(8)    | 1.473(6) |
| C(8)-C(9)    | 1.502(7) |
| C(8)-H(8)    | 0.99     |
| C(9)-C(10)   | 1.534(7) |
| C(9)-H(9A)   | 0.98     |
| C(9)-H(9B)   | 0.98     |
| C(10)-C(19)  | 1.546(7) |
| C(10)-C(11)  | 1.567(6) |
| C(10)-H(10)  | 0.99     |
| C(11)-C(12)  | 1.532(6) |
| C(11)-C(13)  | 1.547(6) |
| C(13)-C(14)  | 1.527(6) |
| C(13)-H(13A) | 0.98     |
| C(13)-H(13B) | 0.98     |
| C(14)-C(15)  | 1.482(7) |
| C(14)-H(14)  | 0.99     |
| C(15)-C(16)  | 1.343(8) |
| C(15)-C(18)  | 1.397(9) |
| C(16)-H(16)  | 0.94     |
| C(17)-C(18)  | 1.344(8) |
| C(17)-H(17)  | 0.94     |
| C(18)-H(18)  | 0.94     |
| C(19)-H(19A) | 0.97     |
| C(19)-H(19B) | 0.97     |
| C(19)-H(19C) | 0.97     |

|                  |          |
|------------------|----------|
| C(1)-O(2)-C(8)   | 108.5(3) |
| C(12)-O(4)-C(14) | 111.3(3) |
| C(17)-O(5)-C(16) | 105.6(5) |
| O(1)-C(1)-O(2)   | 121.1(5) |
| O(1)-C(1)-C(2)   | 129.6(5) |
| O(2)-C(1)-C(2)   | 109.3(4) |
| C(7)-C(2)-C(1)   | 106.9(4) |
| C(7)-C(2)-C(3)   | 124.5(4) |
| C(1)-C(2)-C(3)   | 128.6(4) |
| C(2)-C(3)-C(4)   | 108.1(4) |
| C(2)-C(3)-H(3A)  | 110.1    |
| C(4)-C(3)-H(3A)  | 110.1    |
| C(2)-C(3)-H(3B)  | 110.1    |
| C(4)-C(3)-H(3B)  | 110.1    |
| H(3A)-C(3)-H(3B) | 108.4    |
| C(5)-C(4)-C(3)   | 111.7(4) |

|                    |          |
|--------------------|----------|
| C(5)-C(4)-H(4A)    | 109.3    |
| C(3)-C(4)-H(4A)    | 109.3    |
| C(5)-C(4)-H(4B)    | 109.3    |
| C(3)-C(4)-H(4B)    | 109.3    |
| H(4A)-C(4)-H(4B)   | 108      |
| C(4)-C(5)-C(6)     | 112.7(4) |
| C(4)-C(5)-H(5A)    | 109.1    |
| C(6)-C(5)-H(5A)    | 109.1    |
| C(4)-C(5)-H(5B)    | 109.1    |
| C(6)-C(5)-H(5B)    | 109.1    |
| H(5A)-C(5)-H(5B)   | 107.8    |
| C(7)-C(6)-C(5)     | 110.9(4) |
| C(7)-C(6)-C(11)    | 110.0(4) |
| C(5)-C(6)-C(11)    | 114.0(3) |
| C(7)-C(6)-Br(1)    | 104.2(3) |
| C(5)-C(6)-Br(1)    | 108.6(3) |
| C(11)-C(6)-Br(1)   | 108.7(3) |
| C(2)-C(7)-C(6)     | 125.9(4) |
| C(2)-C(7)-C(8)     | 111.4(4) |
| C(6)-C(7)-C(8)     | 122.5(4) |
| O(2)-C(8)-C(7)     | 103.7(4) |
| O(2)-C(8)-C(9)     | 113.4(4) |
| C(7)-C(8)-C(9)     | 109.9(4) |
| O(2)-C(8)-H(8)     | 109.9    |
| C(7)-C(8)-H(8)     | 109.9    |
| C(9)-C(8)-H(8)     | 109.9    |
| C(8)-C(9)-C(10)    | 111.2(4) |
| C(8)-C(9)-H(9A)    | 109.4    |
| C(10)-C(9)-H(9A)   | 109.4    |
| C(8)-C(9)-H(9B)    | 109.4    |
| C(10)-C(9)-H(9B)   | 109.4    |
| H(9A)-C(9)-H(9B)   | 108      |
| C(9)-C(10)-C(19)   | 108.6(4) |
| C(9)-C(10)-C(11)   | 113.2(4) |
| C(19)-C(10)-C(11)  | 112.2(4) |
| C(9)-C(10)-H(10)   | 107.5    |
| C(19)-C(10)-H(10)  | 107.5    |
| C(11)-C(10)-H(10)  | 107.5    |
| C(12)-C(11)-C(13)  | 102.3(3) |
| C(12)-C(11)-C(6)   | 108.1(3) |
| C(13)-C(11)-C(6)   | 112.6(4) |
| C(12)-C(11)-C(10)  | 108.0(4) |
| C(13)-C(11)-C(10)  | 112.7(4) |
| C(6)-C(11)-C(10)   | 112.5(3) |
| O(3)-C(12)-O(4)    | 120.3(4) |
| O(3)-C(12)-C(11)   | 128.1(4) |
| O(4)-C(12)-C(11)   | 111.6(4) |
| C(14)-C(13)-C(11)  | 105.9(4) |
| C(14)-C(13)-H(13A) | 110.6    |

|                     |          |
|---------------------|----------|
| C(11)-C(13)-H(13A)  | 110.6    |
| C(14)-C(13)-H(13B)  | 110.6    |
| C(11)-C(13)-H(13B)  | 110.6    |
| H(13A)-C(13)-H(13B) | 108.7    |
| O(4)-C(14)-C(15)    | 108.2(4) |
| O(4)-C(14)-C(13)    | 104.7(4) |
| C(15)-C(14)-C(13)   | 116.2(4) |
| O(4)-C(14)-H(14)    | 109.2    |
| C(15)-C(14)-H(14)   | 109.2    |
| C(13)-C(14)-H(14)   | 109.2    |
| C(16)-C(15)-C(18)   | 105.0(5) |
| C(16)-C(15)-C(14)   | 128.2(5) |
| C(18)-C(15)-C(14)   | 126.7(5) |
| C(15)-C(16)-O(5)    | 111.2(6) |
| C(15)-C(16)-H(16)   | 124.4    |
| O(5)-C(16)-H(16)    | 124.4    |
| O(5)-C(17)-C(18)    | 110.3(6) |
| O(5)-C(17)-H(17)    | 124.9    |
| C(18)-C(17)-H(17)   | 124.9    |
| C(17)-C(18)-C(15)   | 107.9(7) |
| C(17)-C(18)-H(18)   | 126.1    |
| C(15)-C(18)-H(18)   | 126.1    |
| C(10)-C(19)-H(19A)  | 109.5    |
| C(10)-C(19)-H(19B)  | 109.5    |
| H(19A)-C(19)-H(19B) | 109.5    |
| C(10)-C(19)-H(19C)  | 109.5    |
| H(19A)-C(19)-H(19C) | 109.5    |
| H(19B)-C(19)-H(19C) | 109.5    |

**Table 4.** Anisotropic displacement parameters ( $\text{\AA}^2 \times 10^3$ ) for 25. The anisotropic displacement factor exponent takes the form:  $-2p^2 [ h^2 a^* 2U^{11} + \dots + 2 h k a^* b^* U^{12}]$

|       | $U^{11}$ | $U^{22}$ | $U^{33}$ | $U^{23}$ | $U^{13}$ | $U^{12}$ |
|-------|----------|----------|----------|----------|----------|----------|
| Br(1) | 46(1)    | 35(1)    | 54(1)    | 5(1)     | -8(1)    | -13(1)   |
| O(1)  | 90(3)    | 44(2)    | 46(2)    | 12(2)    | -14(2)   | 5(2)     |
| O(2)  | 45(2)    | 43(2)    | 58(2)    | 11(2)    | -8(2)    | 12(2)    |
| O(3)  | 46(2)    | 39(2)    | 46(2)    | 9(2)     | -3(1)    | -13(1)   |
| O(4)  | 33(2)    | 48(2)    | 44(2)    | 13(2)    | -5(1)    | -12(1)   |
| O(5)  | 81(3)    | 74(3)    | 60(2)    | 16(2)    | -30(2)   | -20(2)   |
| C(1)  | 54(3)    | 33(2)    | 45(3)    | 5(2)     | -10(2)   | -1(2)    |
| C(2)  | 46(2)    | 34(2)    | 36(2)    | 3(2)     | -4(2)    | -2(2)    |
| C(3)  | 71(3)    | 46(3)    | 34(3)    | -1(2)    | 11(2)    | 4(2)     |
| C(4)  | 60(3)    | 43(3)    | 45(3)    | -4(2)    | 7(2)     | 6(2)     |
| C(5)  | 39(2)    | 41(3)    | 44(3)    | 0(2)     | 4(2)     | 6(2)     |
| C(6)  | 31(2)    | 28(2)    | 32(2)    | 2(2)     | -3(2)    | -5(2)    |
| C(7)  | 29(2)    | 30(2)    | 40(2)    | -2(2)    | -4(2)    | -3(2)    |
| C(8)  | 31(2)    | 36(2)    | 49(3)    | 8(2)     | -1(2)    | 1(2)     |
| C(9)  | 39(2)    | 46(3)    | 52(3)    | -4(2)    | 11(2)    | 6(2)     |
| C(10) | 37(2)    | 44(3)    | 43(3)    | -2(2)    | 12(2)    | -1(2)    |

|       |       |       |       |       |        |        |
|-------|-------|-------|-------|-------|--------|--------|
| C(11) | 30(2) | 34(2) | 31(2) | 2(2)  | -1(2)  | -4(2)  |
| C(12) | 32(2) | 36(2) | 34(2) | 1(2)  | -1(2)  | -7(2)  |
| C(13) | 38(2) | 41(2) | 38(2) | 9(2)  | -5(2)  | -10(2) |
| C(14) | 33(2) | 40(2) | 41(3) | 3(2)  | -1(2)  | -6(2)  |
| C(15) | 34(2) | 46(3) | 51(3) | 13(2) | -8(2)  | -7(2)  |
| C(16) | 75(4) | 60(4) | 50(3) | 6(3)  | -23(3) | -3(3)  |
| C(17) | 63(3) | 57(4) | 81(4) | 29(3) | -35(3) | -11(3) |
| C(18) | 71(3) | 49(3) | 84(4) | 17(4) | -29(3) | -7(4)  |
| C(19) | 82(4) | 78(4) | 41(3) | -8(3) | 12(3)  | 11(3)  |

**Table 5. Hydrogen coordinates ( $\times 10^4$ ) and isotropic displacement parameters ( $\text{\AA}^2 \times 10^3$ ) for 25.**

|        | x | y     | z    | U(eq) |     |
|--------|---|-------|------|-------|-----|
| H(3A)  |   | 5089  | 4997 | 7830  | 60  |
| H(3B)  |   | 3466  | 4472 | 6765  | 60  |
| H(4A)  |   | 2857  | 6234 | 6626  | 60  |
| H(4B)  |   | 5141  | 6474 | 6539  | 60  |
| H(5A)  |   | 3302  | 6632 | 4397  | 50  |
| H(5B)  |   | 2556  | 5481 | 4475  | 50  |
| H(8)   |   | 9477  | 4708 | 4467  | 47  |
| H(9A)  |   | 6761  | 3200 | 3281  | 54  |
| H(9B)  |   | 8897  | 3443 | 2849  | 54  |
| H(10)  |   | 7828  | 5055 | 2026  | 49  |
| H(13A) |   | 4422  | 6652 | 1988  | 47  |
| H(13B) |   | 4636  | 5879 | 784   | 47  |
| H(14)  |   | 1226  | 6256 | 2075  | 46  |
| H(16)  |   | 1026  | 4493 | -780  | 77  |
| H(17)  |   | -1432 | 7026 | -2382 | 84  |
| H(18)  |   | -99   | 7427 | -80   | 85  |
| H(19A) |   | 5220  | 3462 | 921   | 100 |
| H(19B) |   | 7370  | 3684 | 504   | 100 |
| H(19C) |   | 5625  | 4489 | 149   | 100 |

**Table 6. Torsion angles [ $^\circ$ ] for 25.**

|                      |           |
|----------------------|-----------|
| C(8)-O(2)-C(1)-O(1)  | -176.7(5) |
| C(8)-O(2)-C(1)-C(2)  | 3.4(5)    |
| O(1)-C(1)-C(2)-C(7)  | 178.5(5)  |
| O(2)-C(1)-C(2)-C(7)  | -1.6(5)   |
| O(1)-C(1)-C(2)-C(3)  | -2.3(9)   |
| O(2)-C(1)-C(2)-C(3)  | 177.6(5)  |
| C(7)-C(2)-C(3)-C(4)  | -19.7(7)  |
| C(1)-C(2)-C(3)-C(4)  | 161.2(5)  |
| C(2)-C(3)-C(4)-C(5)  | 49.9(6)   |
| C(3)-C(4)-C(5)-C(6)  | -59.6(6)  |
| C(4)-C(5)-C(6)-C(7)  | 33.6(5)   |
| C(4)-C(5)-C(6)-C(11) | 158.4(4)  |
| C(4)-C(5)-C(6)-Br(1) | -80.3(4)  |
| C(1)-C(2)-C(7)-C(6)  | 174.7(4)  |
| C(3)-C(2)-C(7)-C(6)  | -4.5(7)   |

|                         |           |
|-------------------------|-----------|
| C(1)-C(2)-C(7)-C(8)     | -0.9(5)   |
| C(3)-C(2)-C(7)-C(8)     | 179.8(5)  |
| C(5)-C(6)-C(7)-C(2)     | -2.5(6)   |
| C(11)-C(6)-C(7)-C(2)    | -129.5(4) |
| Br(1)-C(6)-C(7)-C(2)    | 114.2(4)  |
| C(5)-C(6)-C(7)-C(8)     | 172.7(4)  |
| C(11)-C(6)-C(7)-C(8)    | 45.7(5)   |
| Br(1)-C(6)-C(7)-C(8)    | -70.6(4)  |
| C(1)-O(2)-C(8)-C(7)     | -3.7(4)   |
| C(1)-O(2)-C(8)-C(9)     | -123.0(4) |
| C(2)-C(7)-C(8)-O(2)     | 2.9(5)    |
| C(6)-C(7)-C(8)-O(2)     | -173.0(4) |
| C(2)-C(7)-C(8)-C(9)     | 124.4(4)  |
| C(6)-C(7)-C(8)-C(9)     | -51.4(5)  |
| O(2)-C(8)-C(9)-C(10)    | 167.6(4)  |
| C(7)-C(8)-C(9)-C(10)    | 52.1(5)   |
| C(8)-C(9)-C(10)-C(19)   | 179.9(4)  |
| C(8)-C(9)-C(10)-C(11)   | -54.7(5)  |
| C(7)-C(6)-C(11)-C(12)   | 77.4(4)   |
| C(5)-C(6)-C(11)-C(12)   | -47.8(5)  |
| Br(1)-C(6)-C(11)-C(12)  | -169.2(3) |
| C(7)-C(6)-C(11)-C(13)   | -170.4(3) |
| C(5)-C(6)-C(11)-C(13)   | 64.4(5)   |
| Br(1)-C(6)-C(11)-C(13)  | -56.9(4)  |
| C(7)-C(6)-C(11)-C(10)   | -41.7(5)  |
| C(5)-C(6)-C(11)-C(10)   | -166.9(4) |
| Br(1)-C(6)-C(11)-C(10)  | 71.8(4)   |
| C(9)-C(10)-C(11)-C(12)  | -69.7(5)  |
| C(19)-C(10)-C(11)-C(12) | 53.6(5)   |
| C(9)-C(10)-C(11)-C(13)  | 178.0(4)  |
| C(19)-C(10)-C(11)-C(13) | -58.6(5)  |
| C(9)-C(10)-C(11)-C(6)   | 49.4(5)   |
| C(19)-C(10)-C(11)-C(6)  | 172.8(4)  |
| C(14)-O(4)-C(12)-O(3)   | 171.3(4)  |
| C(14)-O(4)-C(12)-C(11)  | -9.3(5)   |
| C(13)-C(11)-C(12)-O(3)  | 175.0(5)  |
| C(6)-C(11)-C(12)-O(3)   | -66.0(6)  |
| C(10)-C(11)-C(12)-O(3)  | 55.9(6)   |
| C(13)-C(11)-C(12)-O(4)  | -4.3(5)   |
| C(6)-C(11)-C(12)-O(4)   | 114.7(4)  |
| C(10)-C(11)-C(12)-O(4)  | -123.4(4) |
| C(12)-C(11)-C(13)-C(14) | 15.4(5)   |
| C(6)-C(11)-C(13)-C(14)  | -100.4(4) |
| C(10)-C(11)-C(13)-C(14) | 131.1(4)  |
| C(12)-O(4)-C(14)-C(15)  | 143.5(4)  |
| C(12)-O(4)-C(14)-C(13)  | 19.0(5)   |
| C(11)-C(13)-C(14)-O(4)  | -20.7(5)  |
| C(11)-C(13)-C(14)-C(15) | -140.0(4) |
| O(4)-C(14)-C(15)-C(16)  | -31.9(7)  |



|                         |           |
|-------------------------|-----------|
| C(13)-C(14)-C(15)-C(16) | 85.3(7)   |
| O(4)-C(14)-C(15)-C(18)  | 151.4(5)  |
| C(13)-C(14)-C(15)-C(18) | -91.3(6)  |
| C(18)-C(15)-C(16)-O(5)  | -0.7(7)   |
| C(14)-C(15)-C(16)-O(5)  | -177.9(5) |
| C(17)-O(5)-C(16)-C(15)  | 0.2(7)    |
| C(16)-O(5)-C(17)-C(18)  | 0.4(7)    |
| O(5)-C(17)-C(18)-C(15)  | -0.8(7)   |
| C(16)-C(15)-C(18)-C(17) | 0.9(7)    |
| C(14)-C(15)-C(18)-C(17) | 178.1(5)  |

## 2) X-ray structure of (+)-Cracrosone E (7) (CCDC 2279407)

The sample of (+)-cracrosone E (7) was prepared by recrystallization in methanol/water.

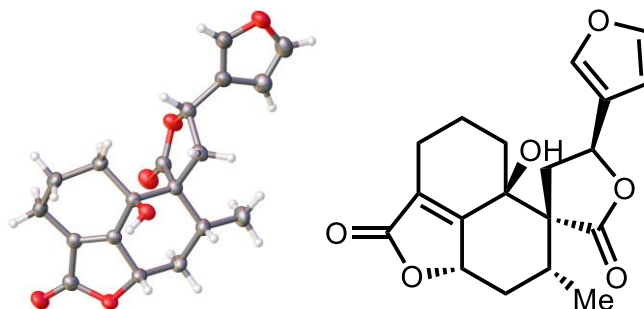

**Table 1 Crystal data and structure refinement for (+)-cracrosone E (7).**

|                                             |                                                               |
|---------------------------------------------|---------------------------------------------------------------|
| Identification code                         | exp_3388                                                      |
| Empirical formula                           | C <sub>19</sub> H <sub>20</sub> O <sub>6</sub>                |
| Formula weight                              | 344.35                                                        |
| Temperature/K                               | 172.95(13)                                                    |
| Crystal system                              | orthorhombic                                                  |
| Space group                                 | P2 <sub>1</sub> 2 <sub>1</sub> 2 <sub>1</sub>                 |
| a/Å                                         | 6.68840(10)                                                   |
| b/Å                                         | 7.0394(2)                                                     |
| c/Å                                         | 35.4914(7)                                                    |
| α/°                                         | 90                                                            |
| β/°                                         | 90                                                            |
| γ/°                                         | 90                                                            |
| Volume/Å <sup>3</sup>                       | 1671.02(6)                                                    |
| Z                                           | 4                                                             |
| ρ <sub>calc</sub> /cm <sup>3</sup>          | 1.369                                                         |
| μ/mm <sup>-1</sup>                          | 0.849                                                         |
| F(000)                                      | 728.0                                                         |
| Crystal size/mm <sup>3</sup>                | 0.36 × 0.14 × 0.12                                            |
| Radiation                                   | Cu Kα (λ = 1.54184)                                           |
| 2θ range for data collection/°              | 9.968 to 134.136                                              |
| Index ranges                                | -7 ≤ h ≤ 7, -8 ≤ k ≤ 8, -42 ≤ l ≤ 42                          |
| Reflections collected                       | 35120                                                         |
| Independent reflections                     | 2978 [R <sub>int</sub> = 0.1301, R <sub>sigma</sub> = 0.0474] |
| Data/restraints/parameters                  | 2978/0/228                                                    |
| Goodness-of-fit on F <sup>2</sup>           | 1.047                                                         |
| Final R indexes [I ≥ 2σ (I)]                | R <sub>1</sub> = 0.0340, wR <sub>2</sub> = 0.0857             |
| Final R indexes [all data]                  | R <sub>1</sub> = 0.0358, wR <sub>2</sub> = 0.0870             |
| Largest diff. peak/hole / e Å <sup>-3</sup> | 0.13/-0.13                                                    |
| Flack parameter                             | -0.05(12)                                                     |

**Table 2 Fractional Atomic Coordinates ( $\times 10^4$ ) and Equivalent Isotropic Displacement Parameters ( $\text{\AA}^2 \times 10^3$ ) for (+)-cracrosone E (7).  $U_{eq}$  is defined as 1/3 of the trace of the orthogonalised  $U_{ij}$  tensor.**

| Atom | x       | y       | z         | U(eq)   |
|------|---------|---------|-----------|---------|
| O1   | 4030(3) | 3649(3) | 4569.9(5) | 43.8(5) |
| O2   | 6230(2) | 5611(3) | 5699.7(4) | 35.8(4) |
| O3   | 6817(2) | 7431(3) | 6198.1(4) | 38.1(4) |
| O4   | 2828(2) | 2705(2) | 6594.0(4) | 27.1(4) |
| O5   | 7610(2) | 6635(3) | 7637.4(4) | 38.2(4) |
| O6   | 4748(2) | 7251(2) | 7329.6(4) | 31.1(4) |
| C1   | 3289(4) | 5415(4) | 4633.5(7) | 42.6(6) |
| C2   | 3469(4) | 5889(4) | 4996.8(7) | 38.7(6) |
| C3   | 4390(3) | 4306(4) | 5179.3(6) | 31.1(5) |
| C4   | 4697(4) | 3001(4) | 4908.6(6) | 39.4(6) |
| C5   | 4895(4) | 4068(3) | 5586.4(6) | 31.3(5) |
| C6   | 3133(3) | 4186(3) | 5860.3(6) | 29.1(5) |
| C7   | 3930(3) | 5269(3) | 6206.3(6) | 24.4(5) |
| C8   | 5797(3) | 6240(3) | 6049.9(6) | 28.7(5) |
| C9   | 2421(3) | 6790(3) | 6353.0(6) | 28.3(5) |
| C10  | 3108(4) | 7829(3) | 6713.7(6) | 31.2(5) |
| C11  | 3645(3) | 6417(3) | 7017.6(6) | 25.7(5) |
| C12  | 6495(3) | 6276(3) | 7376.0(6) | 28.8(5) |
| C13  | 6685(3) | 4869(3) | 7074.6(6) | 25.3(5) |
| C14  | 5036(3) | 4961(3) | 6870.0(5) | 22.5(4) |
| C15  | 4570(3) | 3849(3) | 6525.7(6) | 23.0(5) |
| C16  | 6391(3) | 2591(3) | 6424.8(6) | 28.9(5) |
| C17  | 7462(4) | 1833(3) | 6776.0(6) | 32.1(5) |
| C18  | 8313(3) | 3453(4) | 7014.6(6) | 31.2(5) |
| C19  | 1932(4) | 8300(4) | 6056.5(7) | 38.6(6) |

**Table 3 Anisotropic Displacement Parameters ( $\text{\AA}^2 \times 10^3$ ) for (+)-cracrosone E (7). The Anisotropic displacement factor exponent takes the form:  $-2\pi^2[h^2a^{*2}U_{11}+2hka^*b^*U_{12}+\dots]$ .**

| Atom | $U_{11}$ | $U_{22}$ | $U_{33}$ | $U_{23}$ | $U_{13}$ | $U_{12}$ |
|------|----------|----------|----------|----------|----------|----------|
| O1   | 44.0(10) | 61.1(12) | 26.3(8)  | -1.4(8)  | -1.1(7)  | 2.4(9)   |
| O2   | 33.1(9)  | 47.3(11) | 27.0(8)  | -0.6(7)  | 1.8(7)   | -9.7(8)  |
| O3   | 37.7(9)  | 39.8(10) | 36.7(9)  | 0.5(8)   | -2.0(7)  | -14.7(8) |
| O4   | 29.6(8)  | 26.0(8)  | 25.6(7)  | 0.3(6)   | -0.3(6)  | -6.6(7)  |
| O5   | 33.4(8)  | 49.4(11) | 31.8(8)  | -9.1(8)  | -7.8(7)  | -5.9(8)  |
| O6   | 32.4(8)  | 32.9(8)  | 28.0(8)  | -10.2(6) | -4.7(7)  | 1.3(7)   |
| C1   | 39.5(14) | 51.6(17) | 36.6(13) | 13.0(12) | -1.0(11) | -2.2(13) |
| C2   | 42.5(14) | 36.4(14) | 37.3(13) | 5.5(10)  | 1.4(11)  | -1.2(11) |
| C3   | 29.2(11) | 37.9(14) | 26.3(11) | 1.5(10)  | 2.3(9)   | -0.4(10) |
| C4   | 37.1(13) | 50.6(16) | 30.7(13) | -1.0(11) | -1.9(10) | 7.7(12)  |
| C5   | 33.0(12) | 33.1(13) | 27.8(11) | 0.2(9)   | -2.3(9)  | -1.2(10) |

|     |          |          |          |          |          |          |
|-----|----------|----------|----------|----------|----------|----------|
| C6  | 32.2(12) | 30.8(12) | 24.4(11) | -0.8(9)  | -3.4(9)  | -5.3(10) |
| C7  | 25.8(10) | 22.8(11) | 24.5(11) | -0.4(9)  | -3.1(8)  | -3.4(9)  |
| C8  | 29.4(11) | 29.8(12) | 27.0(11) | 2.3(9)   | -1.9(9)  | -3.1(9)  |
| C9  | 28.0(11) | 26.2(12) | 30.6(11) | 0.3(9)   | -3.9(9)  | 1.8(9)   |
| C10 | 36.3(13) | 22.9(11) | 34.3(12) | -2.6(9)  | -3.3(10) | 4.6(10)  |
| C11 | 27.0(10) | 25.5(11) | 24.6(10) | -6.4(8)  | -3.4(8)  | 0.7(9)   |
| C12 | 28.2(11) | 31.3(12) | 26.9(11) | 0.0(9)   | -0.7(9)  | -5.0(9)  |
| C13 | 24.8(10) | 25.9(11) | 25.2(10) | 2.3(9)   | 1.2(8)   | -3.6(9)  |
| C14 | 23.6(10) | 20.8(11) | 23.2(10) | 2.1(8)   | 2.6(8)   | -3.5(9)  |
| C15 | 24.1(10) | 18.9(10) | 26.2(11) | 0.0(8)   | 0.2(8)   | -1.4(8)  |
| C16 | 33.0(12) | 26.1(11) | 27.7(11) | -2.1(9)  | 1.8(9)   | 5.7(10)  |
| C17 | 31.7(11) | 30.1(12) | 34.4(12) | -0.5(10) | -0.9(9)  | 8.9(10)  |
| C18 | 24.2(10) | 37.7(13) | 31.7(11) | -0.3(10) | -1.3(9)  | 3.1(10)  |
| C19 | 45.3(14) | 32.8(13) | 37.7(13) | 5.9(11)  | -8.3(11) | 6.0(11)  |

**Table 4 Bond Lengths for (+)-cracrosone E (7).**

| Atom | Atom | Length/Å | Atom | Atom | Length/Å |
|------|------|----------|------|------|----------|
| O1   | C1   | 1.357(3) | C7   | C8   | 1.528(3) |
| O1   | C4   | 1.361(3) | C7   | C9   | 1.561(3) |
| O2   | C5   | 1.462(3) | C7   | C15  | 1.571(3) |
| O2   | C8   | 1.351(3) | C9   | C10  | 1.544(3) |
| O3   | C8   | 1.202(3) | C9   | C19  | 1.531(3) |
| O4   | C15  | 1.436(2) | C10  | C11  | 1.510(3) |
| O5   | C12  | 1.217(3) | C11  | C14  | 1.480(3) |
| O6   | C11  | 1.454(2) | C12  | C13  | 1.464(3) |
| O6   | C12  | 1.365(3) | C13  | C14  | 1.322(3) |
| C1   | C2   | 1.337(4) | C13  | C18  | 1.491(3) |
| C2   | C3   | 1.429(3) | C14  | C15  | 1.484(3) |
| C3   | C4   | 1.345(3) | C15  | C16  | 1.548(3) |
| C3   | C5   | 1.493(3) | C16  | C17  | 1.533(3) |
| C5   | C6   | 1.530(3) | C17  | C18  | 1.530(3) |
| C6   | C7   | 1.540(3) |      |      |          |

**Table 5 Bond Angles for (+)-cracrosone E (7).**

| Atom | Atom | Atom | Angle/°    | Atom | Atom | Atom | Angle/°    |
|------|------|------|------------|------|------|------|------------|
| C1   | O1   | C4   | 106.26(19) | C19  | C9   | C10  | 107.75(19) |
| C8   | O2   | C5   | 111.43(17) | C11  | C10  | C9   | 110.57(18) |
| C12  | O6   | C11  | 108.88(16) | O6   | C11  | C10  | 113.52(18) |
| C2   | C1   | O1   | 110.8(2)   | O6   | C11  | C14  | 103.29(16) |
| C1   | C2   | C3   | 106.3(2)   | C14  | C11  | C10  | 110.64(17) |
| C2   | C3   | C5   | 128.6(2)   | O5   | C12  | O6   | 120.8(2)   |
| C4   | C3   | C2   | 105.9(2)   | O5   | C12  | C13  | 130.1(2)   |

|     |    |     |            |     |     |     |            |
|-----|----|-----|------------|-----|-----|-----|------------|
| C4  | C3 | C5  | 125.5(2)   | O6  | C12 | C13 | 109.04(17) |
| C3  | C4 | O1  | 110.6(2)   | C12 | C13 | C18 | 128.33(19) |
| O2  | C5 | C3  | 108.72(19) | C14 | C13 | C12 | 107.20(19) |
| O2  | C5 | C6  | 104.82(17) | C14 | C13 | C18 | 124.3(2)   |
| C3  | C5 | C6  | 115.8(2)   | C11 | C14 | C15 | 121.65(18) |
| C5  | C6 | C7  | 105.45(18) | C13 | C14 | C11 | 111.34(19) |
| C6  | C7 | C9  | 112.42(17) | C13 | C14 | C15 | 127.0(2)   |
| C6  | C7 | C15 | 110.78(17) | O4  | C15 | C7  | 104.93(16) |
| C8  | C7 | C6  | 102.41(17) | O4  | C15 | C14 | 109.10(16) |
| C8  | C7 | C9  | 110.01(17) | O4  | C15 | C16 | 110.88(16) |
| C8  | C7 | C15 | 108.94(17) | C14 | C15 | C7  | 108.41(16) |
| C9  | C7 | C15 | 111.83(17) | C14 | C15 | C16 | 109.08(18) |
| O2  | C8 | C7  | 111.26(18) | C16 | C15 | C7  | 114.28(17) |
| O3  | C8 | O2  | 120.6(2)   | C17 | C16 | C15 | 112.25(17) |
| O3  | C8 | C7  | 128.1(2)   | C18 | C17 | C16 | 111.37(19) |
| C10 | C9 | C7  | 114.14(17) | C13 | C18 | C17 | 107.80(18) |
| C19 | C9 | C7  | 112.65(18) |     |     |     |            |

**Table 6 Torsion Angles for (+)-cracrosone E (7).**

| A  | B   | C   | D   | Angle/°     | A   | B   | C   | D   | Angle/°     |
|----|-----|-----|-----|-------------|-----|-----|-----|-----|-------------|
| O1 | C1  | C2  | C3  | -0.2(3)     | C8  | C7  | C9  | C19 | 53.3(2)     |
| O2 | C5  | C6  | C7  | -21.6(2)    | C8  | C7  | C15 | O4  | -167.16(16) |
| O4 | C15 | C16 | C17 | -84.2(2)    | C8  | C7  | C15 | C14 | 76.4(2)     |
| O5 | C12 | C13 | C14 | 176.8(2)    | C8  | C7  | C15 | C16 | -45.5(2)    |
| O5 | C12 | C13 | C18 | 1.5(4)      | C9  | C7  | C8  | O2  | -128.61(19) |
| O6 | C11 | C14 | C13 | 2.8(2)      | C9  | C7  | C8  | O3  | 50.7(3)     |
| O6 | C11 | C14 | C15 | -175.15(17) | C9  | C7  | C15 | O4  | 71.02(19)   |
| O6 | C12 | C13 | C14 | -3.1(2)     | C9  | C7  | C15 | C14 | -45.4(2)    |
| O6 | C12 | C13 | C18 | -178.4(2)   | C9  | C7  | C15 | C16 | -167.32(18) |
| C1 | O1  | C4  | C3  | 0.1(3)      | C9  | C10 | C11 | O6  | 166.00(17)  |
| C1 | C2  | C3  | C4  | 0.2(3)      | C9  | C10 | C11 | C14 | 50.4(2)     |
| C1 | C2  | C3  | C5  | -178.6(2)   | C10 | C11 | C14 | C13 | 124.6(2)    |
| C2 | C3  | C4  | O1  | -0.2(3)     | C10 | C11 | C14 | C15 | -53.3(2)    |
| C2 | C3  | C5  | O2  | -58.1(3)    | C11 | O6  | C12 | O5  | -175.0(2)   |
| C2 | C3  | C5  | C6  | 59.5(3)     | C11 | O6  | C12 | C13 | 4.9(2)      |
| C3 | C5  | C6  | C7  | -141.4(2)   | C11 | C14 | C15 | O4  | -64.0(2)    |
| C4 | O1  | C1  | C2  | 0.1(3)      | C11 | C14 | C15 | C7  | 49.8(2)     |
| C4 | C3  | C5  | O2  | 123.3(3)    | C11 | C14 | C15 | C16 | 174.76(18)  |
| C4 | C3  | C5  | C6  | -119.1(3)   | C12 | O6  | C11 | C10 | -124.52(19) |
| C5 | O2  | C8  | O3  | 175.6(2)    | C12 | O6  | C11 | C14 | -4.7(2)     |
| C5 | O2  | C8  | C7  | -5.0(2)     | C12 | C13 | C14 | C11 | 0.0(2)      |
| C5 | C3  | C4  | O1  | 178.7(2)    | C12 | C13 | C14 | C15 | 177.84(19)  |
| C5 | C6  | C7  | C8  | 18.4(2)     | C12 | C13 | C18 | C17 | 156.9(2)    |

|    |     |     |     |             |     |     |     |     |             |
|----|-----|-----|-----|-------------|-----|-----|-----|-----|-------------|
| C5 | C6  | C7  | C9  | 136.42(19)  | C13 | C14 | C15 | O4  | 118.4(2)    |
| C5 | C6  | C7  | C15 | -97.7(2)    | C13 | C14 | C15 | C7  | -127.8(2)   |
| C6 | C7  | C8  | O2  | -8.9(2)     | C13 | C14 | C15 | C16 | -2.8(3)     |
| C6 | C7  | C8  | O3  | 170.4(2)    | C14 | C13 | C18 | C17 | -17.6(3)    |
| C6 | C7  | C9  | C10 | 176.60(18)  | C14 | C15 | C16 | C17 | 36.0(2)     |
| C6 | C7  | C9  | C19 | -60.1(2)    | C15 | C7  | C8  | O2  | 108.5(2)    |
| C6 | C7  | C15 | O4  | -55.2(2)    | C15 | C7  | C8  | O3  | -72.2(3)    |
| C6 | C7  | C15 | C14 | -171.70(17) | C15 | C7  | C9  | C10 | 51.2(2)     |
| C6 | C7  | C15 | C16 | 66.4(2)     | C15 | C7  | C9  | C19 | 174.54(18)  |
| C7 | C9  | C10 | C11 | -53.3(2)    | C15 | C16 | C17 | C18 | -62.4(2)    |
| C7 | C15 | C16 | C17 | 157.52(19)  | C16 | C17 | C18 | C13 | 50.1(2)     |
| C8 | O2  | C5  | C3  | 141.3(2)    | C18 | C13 | C14 | C11 | 175.55(19)  |
| C8 | O2  | C5  | C6  | 16.9(2)     | C18 | C13 | C14 | C15 | -6.7(3)     |
| C8 | C7  | C9  | C10 | -70.0(2)    | C19 | C9  | C10 | C11 | -179.19(19) |

**Table 7 Hydrogen Atom Coordinates ( $\text{\AA}\times 10^4$ ) and Isotropic Displacement Parameters ( $\text{\AA}^2\times 10^3$ ) for (+)-cracrosone E (7).**

| Atom | x       | y       | z       | U(eq) |
|------|---------|---------|---------|-------|
| H4   | 2825.36 | 2341.84 | 6819.39 | 41    |
| H1   | 2718.04 | 6207.23 | 4445.33 | 51    |
| H2   | 3065.24 | 7048.15 | 5110.79 | 46    |
| H4A  | 5297.05 | 1793.97 | 4948.3  | 47    |
| H5   | 5595.75 | 2826.98 | 5622.42 | 38    |
| H6A  | 2676.92 | 2898.6  | 5932.69 | 35    |
| H6B  | 1999.49 | 4877.14 | 5744.56 | 35    |
| H9   | 1146.55 | 6115.12 | 6414.39 | 34    |
| H10A | 4284.24 | 8630.91 | 6655.88 | 37    |
| H10B | 2021.93 | 8667.82 | 6804.63 | 37    |
| H11  | 2404.42 | 5791.3  | 7114.23 | 31    |
| H16A | 5935.68 | 1506.08 | 6269.41 | 35    |
| H16B | 7345.97 | 3342.95 | 6272.56 | 35    |
| H17A | 6509.4  | 1084.95 | 6929.42 | 38    |
| H17B | 8562.21 | 978.22  | 6697.97 | 38    |
| H18A | 8789.6  | 2958.42 | 7259.78 | 37    |
| H18B | 9454.37 | 4054.15 | 6883.01 | 37    |
| H19A | 3162.35 | 8956.54 | 5982.04 | 58    |
| H19B | 986.57  | 9220.06 | 6162.22 | 58    |
| H19C | 1334.58 | 7689.62 | 5835.3  | 58    |

### 3) X-ray structure of **38** (CCDC 2275140)

The sample of **38** was prepared by recrystallization in chloroform.

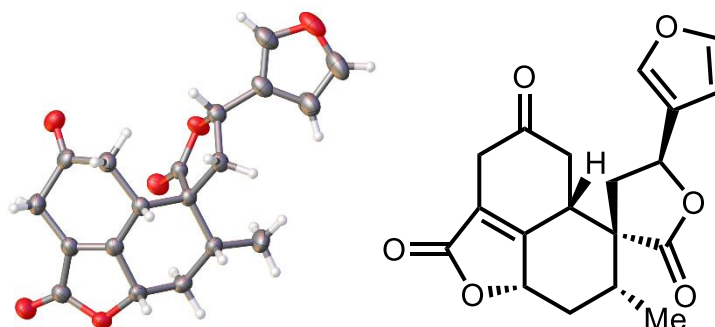

**Table 1 Crystal data and structure refinement for **38**.**

|                                             |                                                               |
|---------------------------------------------|---------------------------------------------------------------|
| Identification code                         | exp_2245                                                      |
| Empirical formula                           | C <sub>19</sub> H <sub>18</sub> O <sub>6</sub>                |
| Formula weight                              | 342.33                                                        |
| Temperature/K                               | 173.00(10)                                                    |
| Crystal system                              | orthorhombic                                                  |
| Space group                                 | P2 <sub>1</sub> 2 <sub>1</sub> 2 <sub>1</sub>                 |
| a/Å                                         | 6.95740(10)                                                   |
| b/Å                                         | 10.4076(2)                                                    |
| c/Å                                         | 22.6105(4)                                                    |
| α/°                                         | 90                                                            |
| β/°                                         | 90                                                            |
| γ/°                                         | 90                                                            |
| Volume/Å <sup>3</sup>                       | 1637.22(5)                                                    |
| Z                                           | 4                                                             |
| ρ <sub>calc</sub> /cm <sup>3</sup>          | 1.389                                                         |
| μ/mm <sup>-1</sup>                          | 0.866                                                         |
| F(000)                                      | 720.0                                                         |
| Crystal size/mm <sup>3</sup>                | 0.36 × 0.28 × 0.04                                            |
| Radiation                                   | CuKα (λ = 1.54184)                                            |
| 2θ range for data collection/°              | 7.82 to 134.144                                               |
| Index ranges                                | -8 ≤ h ≤ 8, -12 ≤ k ≤ 12, -27 ≤ l ≤ 27                        |
| Reflections collected                       | 34372                                                         |
| Independent reflections                     | 2918 [R <sub>int</sub> = 0.0935, R <sub>sigma</sub> = 0.0373] |
| Data/restraints/parameters                  | 2918/0/227                                                    |
| Goodness-of-fit on F <sup>2</sup>           | 1.063                                                         |
| Final R indexes [I >= 2σ (I)]               | R <sub>1</sub> = 0.0328, wR <sub>2</sub> = 0.0835             |
| Final R indexes [all data]                  | R <sub>1</sub> = 0.0351, wR <sub>2</sub> = 0.0847             |
| Largest diff. peak/hole / e Å <sup>-3</sup> | 0.11/-0.15                                                    |
| Flack parameter                             | -0.15(14)                                                     |

**Table 2 Fractional Atomic Coordinates (×10<sup>4</sup>) and Equivalent Isotropic Displacement Parameters (Å<sup>2</sup>×10<sup>3</sup>) for **38**. U<sub>eq</sub> is defined as 1/3 of the trace of the orthogonalised U<sub>ij</sub> tensor.**

| Atom | x       | y          | z          | U(eq)   |
|------|---------|------------|------------|---------|
| O1   | 8793(4) | 6175(2)    | 5549.6(8)  | 55.3(6) |
| O2   | 6376(2) | 4321.9(17) | 3980.1(7)  | 37.4(4) |
| O3   | 5083(2) | 2860.3(16) | 3387.3(7)  | 37.1(4) |
| O4   | -316(2) | 2686.3(17) | 2447.1(7)  | 37.9(4) |
| O5   | 914(3)  | 2344.3(19) | 1541.1(8)  | 47.9(5) |
| O6   | 6935(3) | 5167.6(19) | 2219.5(8)  | 45.5(5) |
| C1   | 7278(5) | 5533(3)    | 5784.3(13) | 56.4(8) |
| C2   | 5992(5) | 5227(3)    | 5367.0(12) | 50.0(7) |
| C3   | 6739(4) | 5710(2)    | 4823.3(11) | 37.1(6) |
| C4   | 8417(5) | 6278(3)    | 4960.2(12) | 47.9(7) |
| C5   | 5925(4) | 5604(2)    | 4216.0(10) | 34.0(5) |
| C6   | 3739(3) | 5718(2)    | 4160.9(10) | 30.5(5) |
| C7   | 4905(3) | 3836(2)    | 3666.7(9)  | 28.5(5) |
| C8   | 3116(3) | 4674(2)    | 3721.2(9)  | 25.7(5) |
| C9   | 1355(3) | 3884(2)    | 3948.9(9)  | 31.8(5) |
| C10  | 601(3)  | 2892(2)    | 3501.8(10) | 34.2(5) |
| C11  | 33(3)   | 3567(2)    | 2933.1(9)  | 32.0(5) |
| C12  | 923(4)  | 2952(3)    | 1999.8(10) | 35.6(5) |
| C13  | 2184(3) | 4008(2)    | 2181.2(10) | 31.8(5) |
| C14  | 1657(3) | 4358(2)    | 2724.5(9)  | 28.9(5) |
| C15  | 2615(3) | 5303(2)    | 3112.6(10) | 28.3(5) |
| C16  | 4295(4) | 5959(2)    | 2780.1(10) | 33.5(5) |
| C17  | 5207(4) | 5196(2)    | 2285.2(10) | 32.2(5) |
| C18  | 3877(4) | 4528(3)    | 1857.3(10) | 38.6(6) |
| C19  | 1752(5) | 3205(3)    | 4534.7(11) | 49.1(8) |

**Table 3 Anisotropic Displacement Parameters ( $\text{\AA}^2 \times 10^3$ ) for 38. The Anisotropic displacement factor exponent takes the form:  $-2\pi^2[h^2a^*U_{11}+2hka^*b^*U_{12}+\dots]$ .**

| Atom | U <sub>11</sub> | U <sub>22</sub> | U <sub>33</sub> | U <sub>23</sub> | U <sub>13</sub> | U <sub>12</sub> |
|------|-----------------|-----------------|-----------------|-----------------|-----------------|-----------------|
| O1   | 63.5(14)        | 51.4(11)        | 50.9(11)        | -12.8(9)        | -26.1(10)       | -3.2(11)        |
| O2   | 25.5(8)         | 47.2(10)        | 39.6(9)         | -14.6(8)        | -5.0(7)         | 5.4(8)          |
| O3   | 35.8(9)         | 34.7(8)         | 40.9(9)         | -12.1(7)        | -0.1(8)         | 6.7(8)          |
| O4   | 28.6(9)         | 50.2(10)        | 34.7(9)         | -10.6(8)        | 1.0(7)          | -8.9(8)         |
| O5   | 47.1(11)        | 59.5(12)        | 37.1(9)         | -15.9(9)        | 2.1(8)          | -12.7(10)       |
| O6   | 33.6(10)        | 63.3(12)        | 39.6(10)        | 6.4(9)          | 4.1(8)          | -1.4(9)         |
| C1   | 79(2)           | 51.0(16)        | 39.2(15)        | 0.4(13)         | -23.8(15)       | 1.8(17)         |
| C2   | 57.2(18)        | 52.7(16)        | 40.0(14)        | 5.7(12)         | -12.4(13)       | -7.2(15)        |
| C3   | 40.5(14)        | 33.4(12)        | 37.3(13)        | -7.4(10)        | -9.0(11)        | 4.6(11)         |
| C4   | 50.5(17)        | 49.9(16)        | 43.5(15)        | -13.5(13)       | -14.0(13)       | -0.6(14)        |
| C5   | 34.6(13)        | 35.0(12)        | 32.4(12)        | -5.5(10)        | -0.2(10)        | -1.8(11)        |
| C6   | 32.6(13)        | 31.8(11)        | 27.2(11)        | -5.6(9)         | 0.1(10)         | 2.5(10)         |
| C7   | 26.8(12)        | 33.7(11)        | 24.9(10)        | 0.1(9)          | -0.2(9)         | -0.1(10)        |



|     |          |          |          |          |          |           |
|-----|----------|----------|----------|----------|----------|-----------|
| C8  | 24.6(11) | 28.4(11) | 24.2(10) | -2.0(8)  | 1.1(9)   | 2.9(9)    |
| C9  | 28.1(12) | 39.1(12) | 28.1(11) | -1.4(10) | 4.4(9)   | 0.3(10)   |
| C10 | 28.2(12) | 39.4(12) | 34.9(12) | -0.9(10) | 3.3(9)   | -6.6(10)  |
| C11 | 22.7(12) | 43.2(13) | 30.2(11) | -7.3(9)  | 1.0(10)  | -0.9(11)  |
| C12 | 30.4(12) | 43.4(13) | 32.9(12) | -7.0(11) | -1.8(10) | -1.7(11)  |
| C13 | 28.2(12) | 40.1(13) | 27.0(11) | -3.2(10) | -1.4(9)  | 1.7(10)   |
| C14 | 23.9(11) | 34.1(12) | 28.9(11) | -0.8(9)  | -1.0(9)  | 5.1(10)   |
| C15 | 27.9(12) | 29.6(11) | 27.5(11) | -0.7(9)  | -1.1(9)  | 2.9(9)    |
| C16 | 38.2(14) | 33.8(12) | 28.6(11) | 1.2(10)  | -1.1(10) | -3.8(10)  |
| C17 | 33.0(13) | 35.0(11) | 28.7(11) | 9.5(9)   | 2.6(10)  | -1.7(10)  |
| C18 | 42.1(14) | 47.0(14) | 26.7(11) | -3.2(10) | 3.9(11)  | -5.9(12)  |
| C19 | 57.8(19) | 59.4(18) | 30.1(13) | 6.6(12)  | 2.5(12)  | -17.8(15) |

**Table 4 Bond Lengths for 38.**

| Atom | Atom | Length/Å | Atom | Atom | Length/Å |
|------|------|----------|------|------|----------|
| O1   | C1   | 1.356(4) | C7   | C8   | 1.525(3) |
| O1   | C4   | 1.362(3) | C8   | C9   | 1.562(3) |
| O2   | C5   | 1.471(3) | C8   | C15  | 1.563(3) |
| O2   | C7   | 1.344(3) | C9   | C10  | 1.537(3) |
| O3   | C7   | 1.203(3) | C9   | C19  | 1.526(3) |
| O4   | C11  | 1.452(3) | C10  | C11  | 1.518(3) |
| O4   | C12  | 1.357(3) | C11  | C14  | 1.475(3) |
| O5   | C12  | 1.215(3) | C12  | C13  | 1.466(3) |
| O6   | C17  | 1.212(3) | C13  | C14  | 1.333(3) |
| C1   | C2   | 1.339(4) | C13  | C18  | 1.489(3) |
| C2   | C3   | 1.426(4) | C14  | C15  | 1.477(3) |
| C3   | C4   | 1.344(4) | C15  | C16  | 1.549(3) |
| C3   | C5   | 1.490(3) | C16  | C17  | 1.512(3) |
| C5   | C6   | 1.531(3) | C17  | C18  | 1.508(3) |
| C6   | C8   | 1.536(3) |      |      |          |

**Table 5 Bond Angles for 38.**

| Atom | Atom | Atom | Angle/°    | Atom | Atom | Atom | Angle/°    |
|------|------|------|------------|------|------|------|------------|
| C1   | O1   | C4   | 105.8(2)   | C19  | C9   | C8   | 112.8(2)   |
| C7   | O2   | C5   | 111.70(18) | C19  | C9   | C10  | 108.8(2)   |
| C12  | O4   | C11  | 109.22(17) | C11  | C10  | C9   | 109.6(2)   |
| C2   | C1   | O1   | 111.2(3)   | O4   | C11  | C10  | 113.10(19) |
| C1   | C2   | C3   | 106.2(3)   | O4   | C11  | C14  | 103.81(17) |
| C2   | C3   | C5   | 129.0(2)   | C14  | C11  | C10  | 109.24(19) |
| C4   | C3   | C2   | 105.8(2)   | O4   | C12  | C13  | 108.93(19) |
| C4   | C3   | C5   | 125.1(3)   | O5   | C12  | O4   | 121.8(2)   |
| C3   | C4   | O1   | 110.9(3)   | O5   | C12  | C13  | 129.2(2)   |

|     |    |     |            |     |     |     |            |
|-----|----|-----|------------|-----|-----|-----|------------|
| O2  | C5 | C3  | 108.7(2)   | C12 | C13 | C18 | 127.5(2)   |
| O2  | C5 | C6  | 104.65(19) | C14 | C13 | C12 | 107.3(2)   |
| C3  | C5 | C6  | 116.6(2)   | C14 | C13 | C18 | 124.9(2)   |
| C5  | C6 | C8  | 106.17(19) | C11 | C14 | C15 | 121.81(19) |
| O2  | C7 | C8  | 111.37(17) | C13 | C14 | C11 | 110.7(2)   |
| O3  | C7 | O2  | 121.1(2)   | C13 | C14 | C15 | 127.3(2)   |
| O3  | C7 | C8  | 127.5(2)   | C14 | C15 | C8  | 110.15(18) |
| C6  | C8 | C9  | 112.37(17) | C14 | C15 | C16 | 110.24(18) |
| C6  | C8 | C15 | 109.65(18) | C16 | C15 | C8  | 116.34(19) |
| C7  | C8 | C6  | 103.09(17) | C17 | C16 | C15 | 116.37(19) |
| C7  | C8 | C9  | 111.46(18) | O6  | C17 | C16 | 121.3(2)   |
| C7  | C8 | C15 | 110.50(17) | O6  | C17 | C18 | 121.2(2)   |
| C9  | C8 | C15 | 109.62(18) | C18 | C17 | C16 | 117.4(2)   |
| C10 | C9 | C8  | 113.84(17) | C13 | C18 | C17 | 109.70(19) |

**Table 6 Hydrogen Atom Coordinates ( $\text{\AA}\times 10^4$ ) and Isotropic Displacement Parameters ( $\text{\AA}^2\times 10^3$ ) for 38.**

| Atom | x        | y       | z       | U(eq) |
|------|----------|---------|---------|-------|
| H1   | 7149.88  | 5332.15 | 6183.06 | 68    |
| H2   | 4840.96  | 4787.68 | 5420.86 | 60    |
| H4   | 9213.71  | 6686.67 | 4688.85 | 58    |
| H5   | 6527.44  | 6254.82 | 3963.25 | 41    |
| H6A  | 3384.78  | 6562.71 | 4015.46 | 37    |
| H6B  | 3130.5   | 5584.7  | 4541.93 | 37    |
| H9   | 311.58   | 4496.89 | 4020.27 | 38    |
| H10A | 1590.81  | 2260.04 | 3420.34 | 41    |
| H10B | -503.43  | 2449.11 | 3665.99 | 41    |
| H11  | -1099.64 | 4108.1  | 2999.84 | 38    |
| H15  | 1666.08  | 5976.4  | 3194.06 | 34    |
| H16A | 3828.38  | 6763.09 | 2617.04 | 40    |
| H16B | 5286.59  | 6167.97 | 3065.9  | 40    |
| H18A | 3452.06  | 5130.22 | 1557.29 | 46    |
| H18B | 4555.27  | 3832.43 | 1662.17 | 46    |
| H19A | 2788.81  | 2606.56 | 4484.32 | 74    |
| H19B | 619.77   | 2753.43 | 4659.5  | 74    |
| H19C | 2097.53  | 3829.43 | 4828.76 | 74    |

## 11. References

1. J. Peed, I. R. Davies, L. R. Peacock, J. E. Taylor, G. Kociok-Köhn and S. D. Bull, Dihydroxylation-based approach for the asymmetric syntheses of hydroxy- $\gamma$ -butyrolactones, *J. Org. Chem.*, **2012**, *77*, 543–555.
2. M. Carda and J. A. Marco, Total synthesis of the (–)-mintlactone and (+)-isomintlactone, *Tetrahedron*, **1992**, *48*, 9789–9800.
3. B. Hong, D. Hu, J. Wu, J. Zhang, H. Li, Y. Pan and X. Lei, Divergent total syntheses of (–)-huperzine Q, (+)-lycopoladine B, (+)-lycopoladine C, and (–)-4-*epi*-lycopoladine D, *Chem. Asian J.*, **2017**, *12*, 1557–1567.
4. D. F. Taber, K. Kanai, Q. Jiang and G. Bui, Enantiomerically pure cyclohexenones by Fe-mediated carbonylation of alkenyl cyclopropanes, *J. Am. Chem. Soc.*, **2000**, *122*, 6807–6808.
5. P. C. Roest, N. W. Michel and R. A. Batey, DABO boronate promoted conjugate allylation of  $\alpha,\beta$ -unsaturated aldehydes using copper(II) catalysis, *J. Org. Chem.*, **2016**, *81*, 6774–6778.
6. S. Zhou, C.-R. Chen and H.-M. Gau, Highly enantioselective 3-furylation of ketones using (3-furyl)titanium nucleophile, *Org. Lett.*, **2010**, *12*, 48–51.
7. Z. H. Mbwambo, K. Foubert, M. Chacha, M. C. Kapingu, J. J. Magadula, M. M. Moshi, F. Lemiere, K. Goubitz, J. Fraanje, R. Peschar, A. Vlietinck, S. Apers and L. Pieters, New furanoditerpenoids from *Croton jatrophoides*, *Planta Med.*, **2009**, *75*, 262–267.
8. M. Bruno, C. Fazio, F. Piozzi, B. Rodriguez and M. C. de la Torre, *Neo*-clerodane diterpenoids from *Teucrium corymbosum*, *Phytochemistry*, **1995**, *40*, 1481–1483.
9. I.-C. Chen, Y.-K. Wu, H.-J. Liu and J.-L. Zhu, Total syntheses of ( $\pm$ )-montanin A and ( $\pm$ )-teuscorolide, *Chem. Commun.*, **2008**, 4720–4722.
10. B. Rodriguez and M. L. Jimeno,  $^1\text{H}$  and  $^{13}\text{C}$  NMR spectral assignments and conformational analysis of 14 19-*nor*-neoclerodane diterpenoids, *Magn. Reson. Chem.*, **2004**, *42*, 605–616.
11. M. Qiu, D. Cao, Y. Gao, S. Li, J. Zhu, B. Yang, L. Zhou, Y. Zhou, J. Jin and Z. Zhao, New clerodane diterpenoids from *Croton crassifolius*, *Fitoterapia*, **2016**, *108*, 81–86.
12. H.-W. Lv, J.-G. Luo, M.-D. Zhu, S.-M. Shan and L.-Y. Kong, Teucvisins A–E, five new *neo*-clerodane diterpenes from *Teucrium viscidum*, *Chem. Pharm. Bull.*, **2014**, *62*, 472–476.
13. G. Savona, M. C. García-Alvarez and B. Rodríguez, Dihydroteugin, a *neo*-clerodane diterpenoid from *Teucrium chamaedrys*, *Phytochemistry*, **1982**, *21*, 721–723.
14. M. Elmastas, R. Erenler, B. Isnac, H. Aksit, O. Sen, N. Genc and I. Demirtas, Isolation and identification of a new *neo*-clerodane diterpenoid from *Teucrium chamaedrys* L. *Nat. Prod. Res.*, **2016**, *30*, 299–304.

15. M. Qiu, J. Jin, L. Zhou, W. Zhou, Y. Liu, Q. Tan, D. Cao and Z. Zhao, Diterpenoids from *Croton crassifolius* include a novel skeleton possibly generated via an intramolecular [2+2]-photocycloaddition reaction, *Phytochemistry*, **2018**, *145*, 103–110.
16. J. L. Marco, B. Rodriguez, C. Pascual, G. Savona and F. Piozzi, Teuscorodin, teuscorodonin and 2-hydroxyteuscorolide, *neo-clerodane* diterpenoids from *Teucrium scorodonia*, *Phytochemistry*, **1983**, *22*, 727–731.

## 12. 2D NMR of (+)-Cracrosone A, (+)-Teucvisin C, Compound 30 and (+)-Cracrosone E

### 1) (+)-Cracrosone A (4) COSY

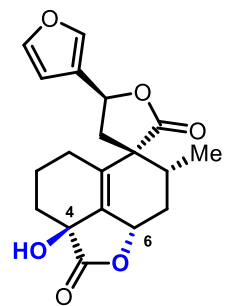

(+)-cracrosone A (4)

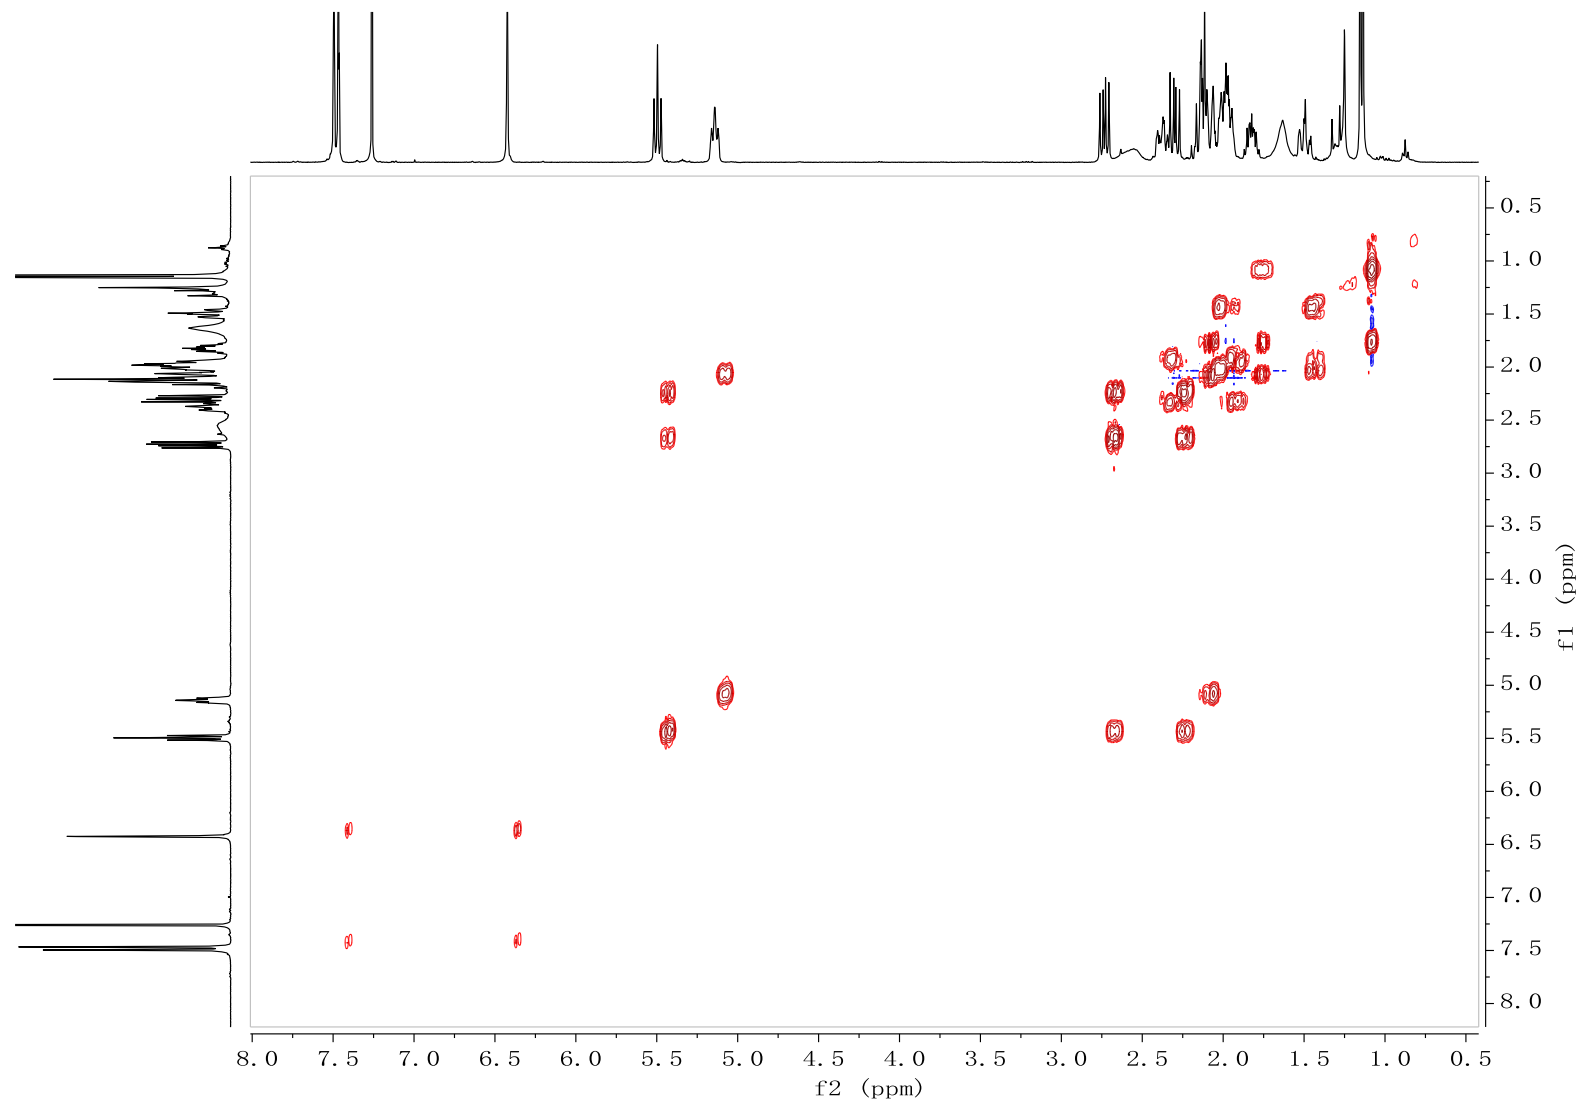

# HSQC

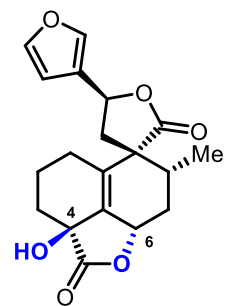

(+)-cracrosone A (4)

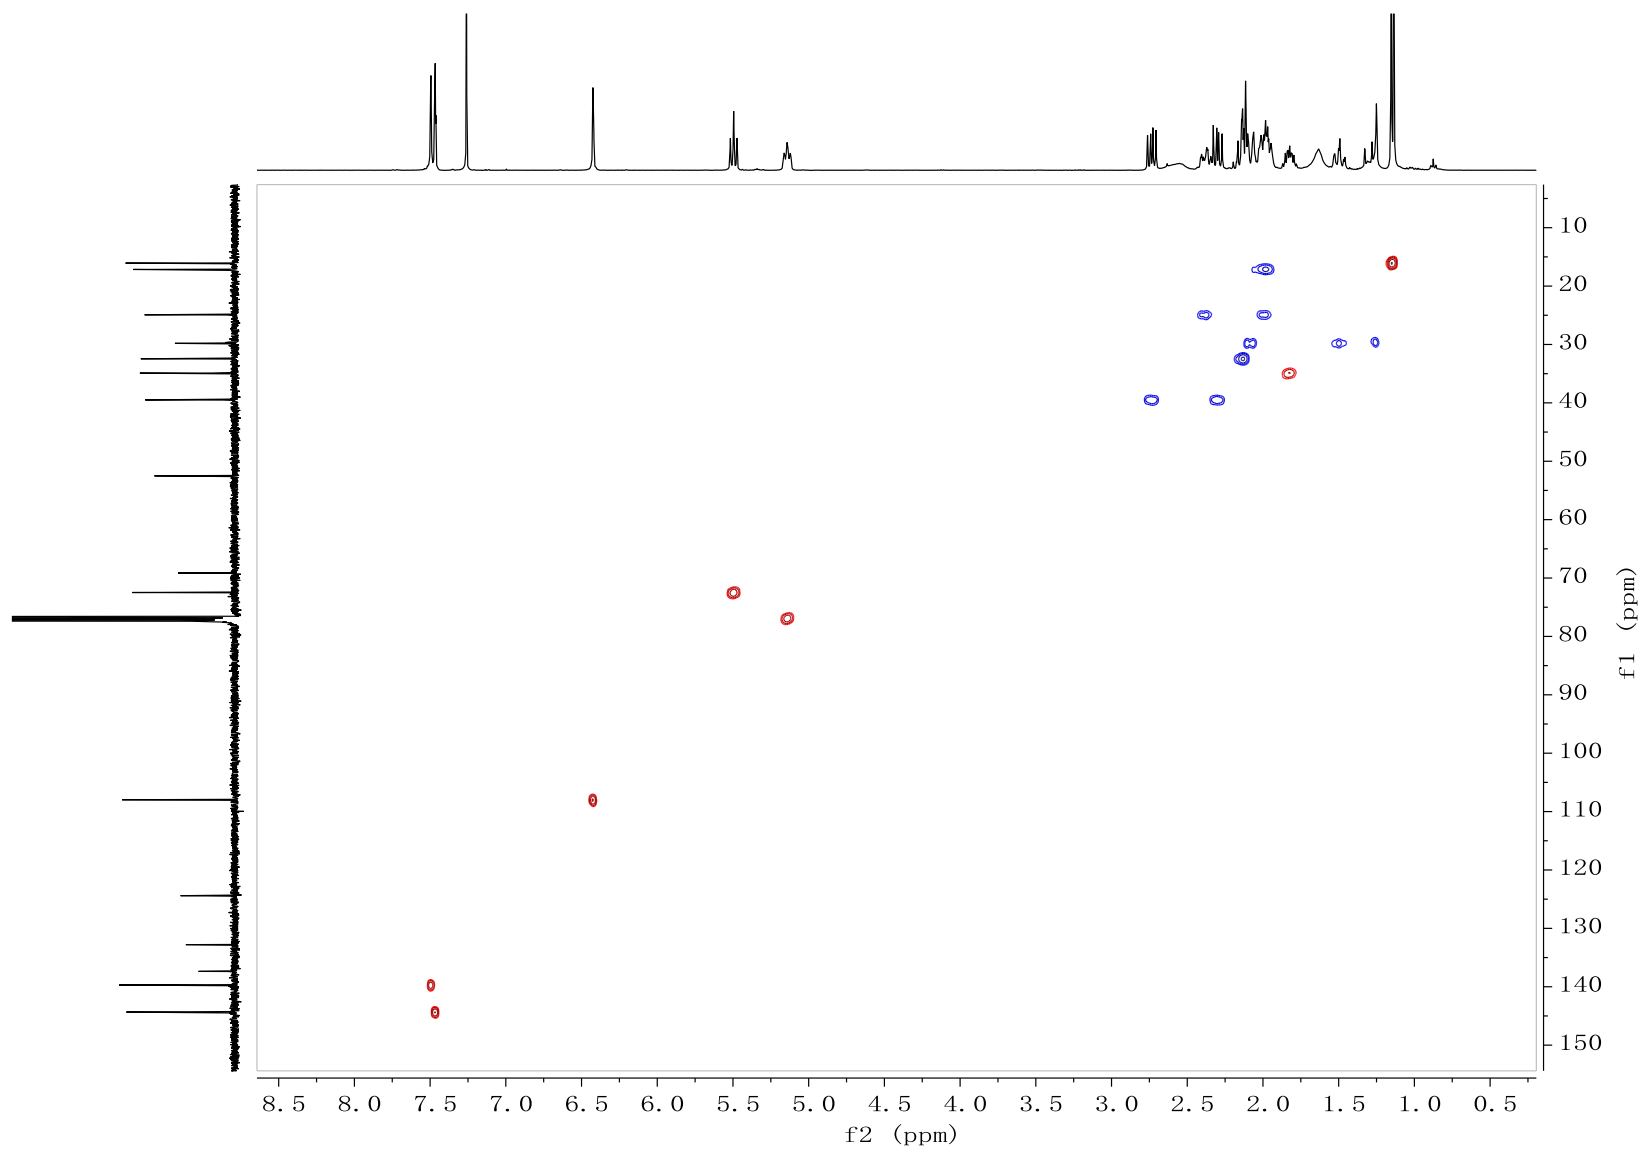

NOESY

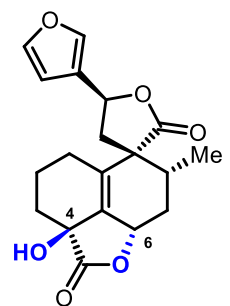

(+)-cracroson A (4)

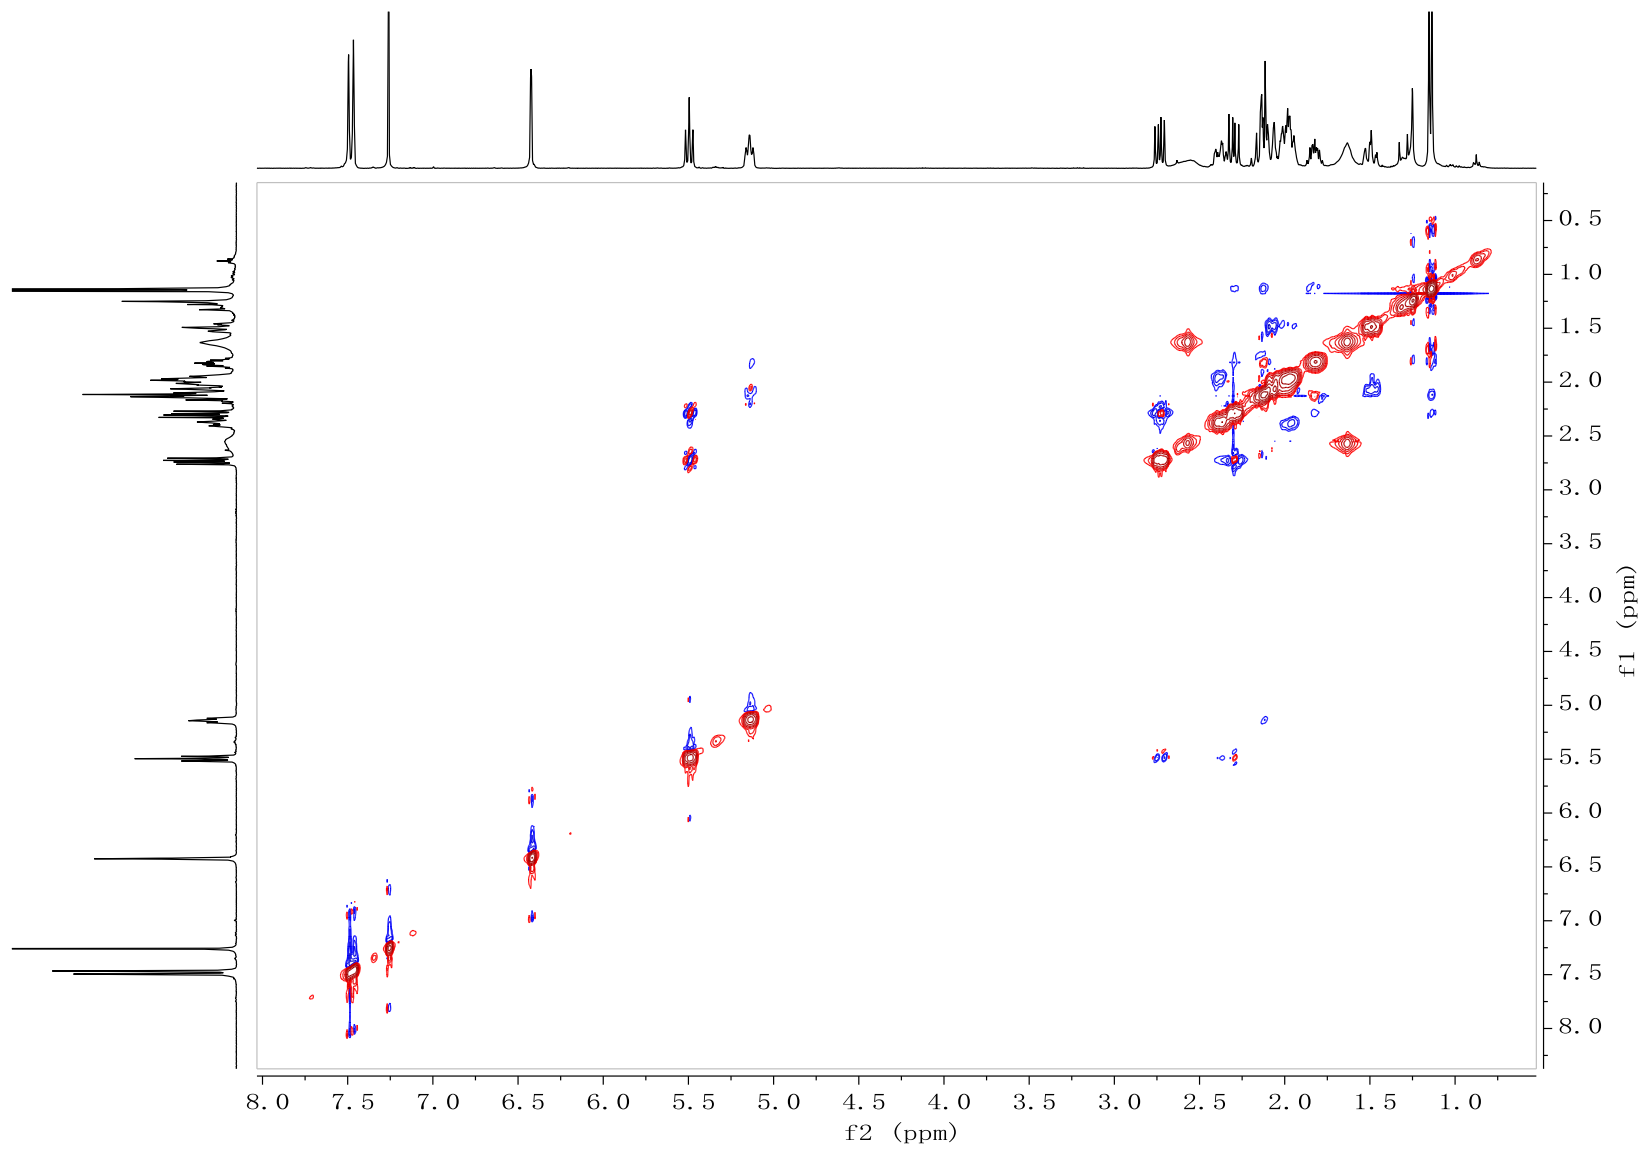

2) (+)-Teucvisin C (5)  
COSY

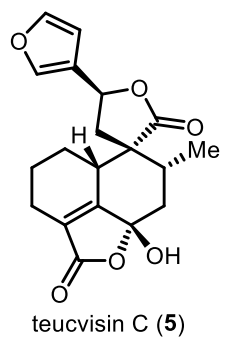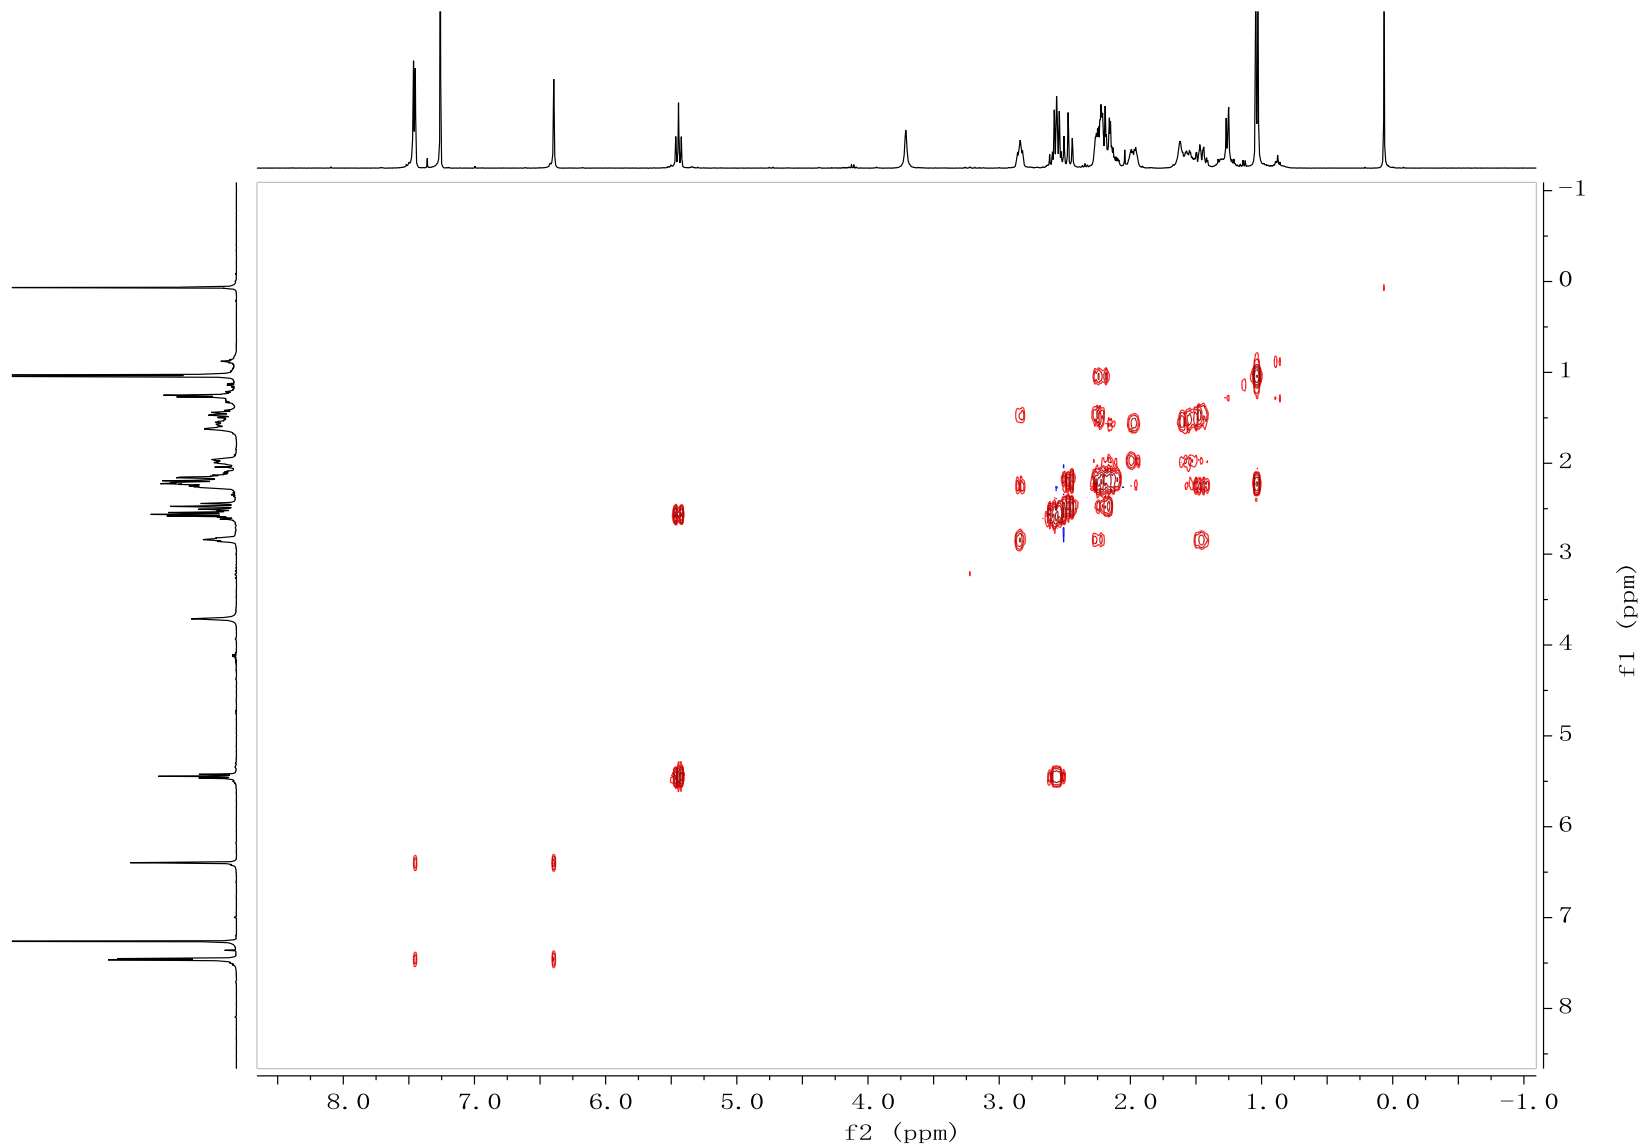



HSQC

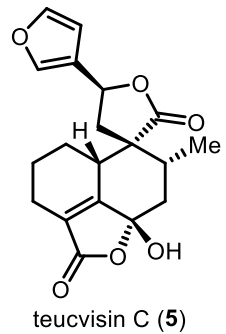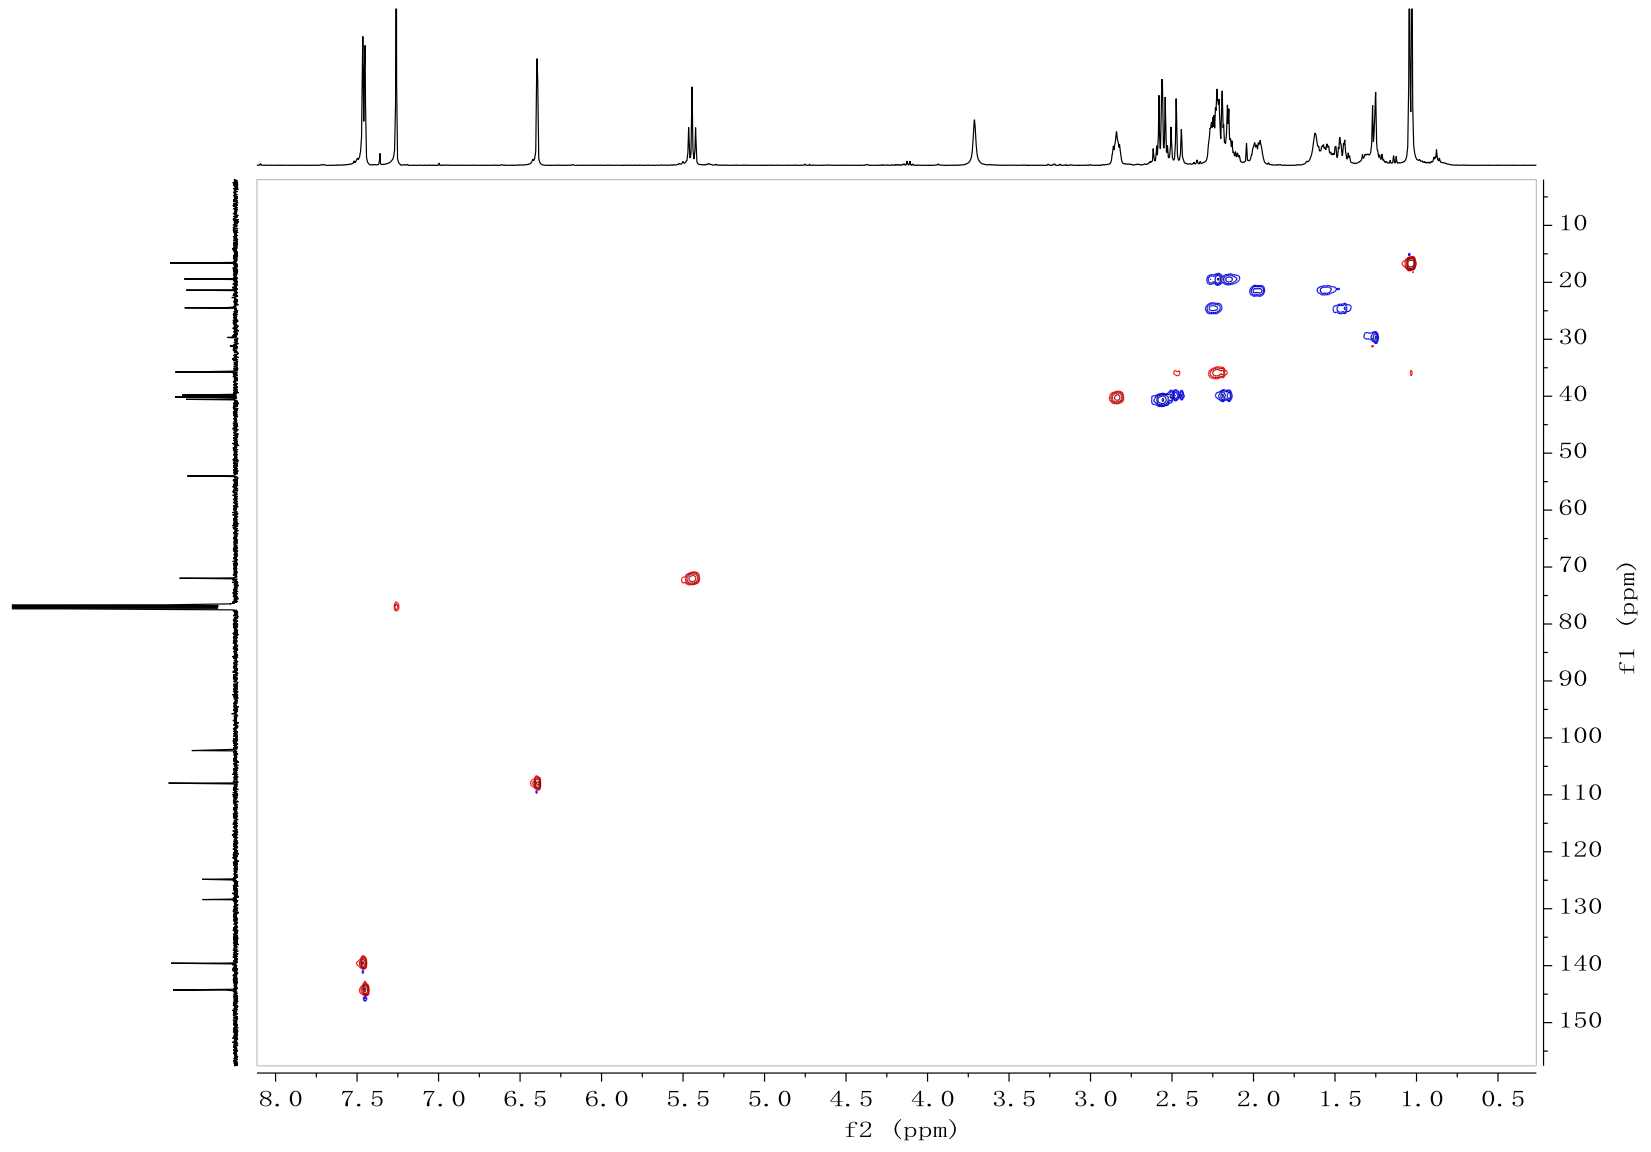

HMBC

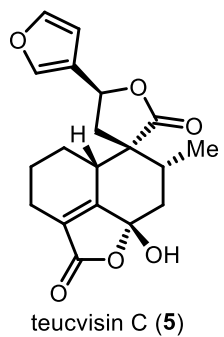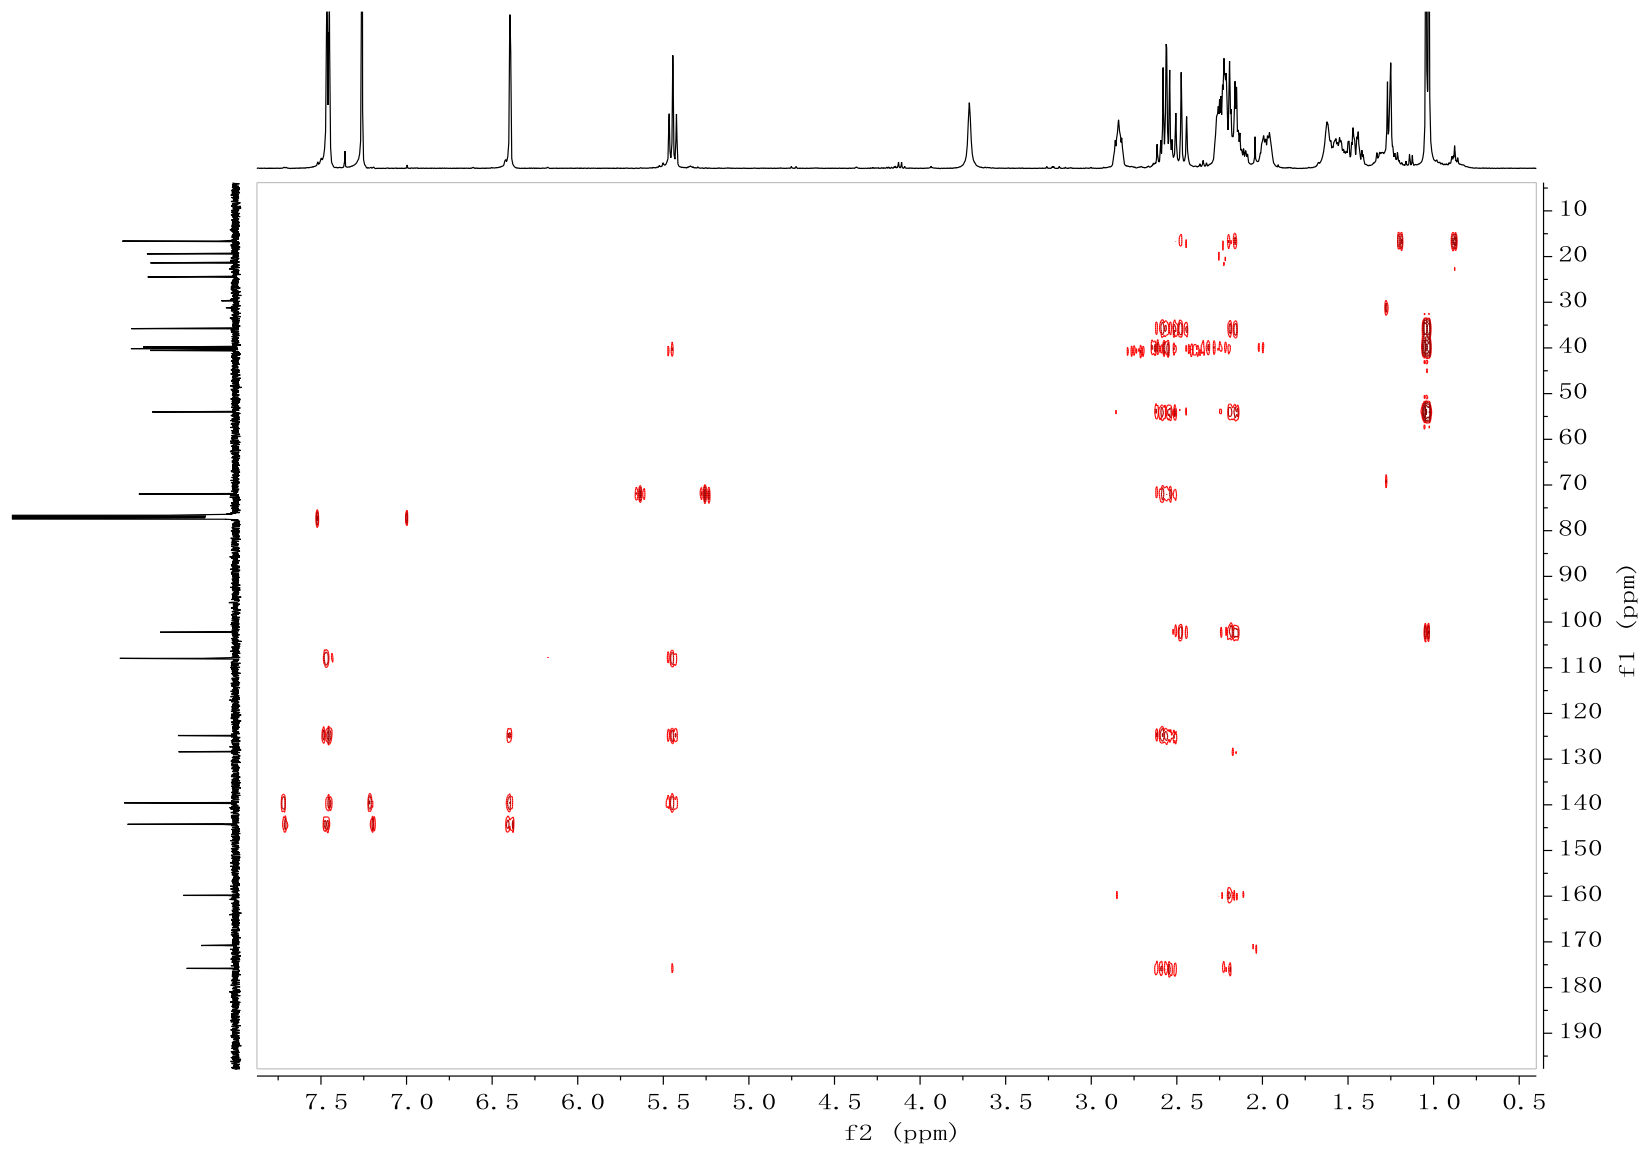

NOESY

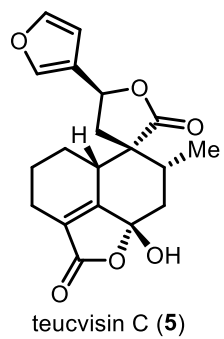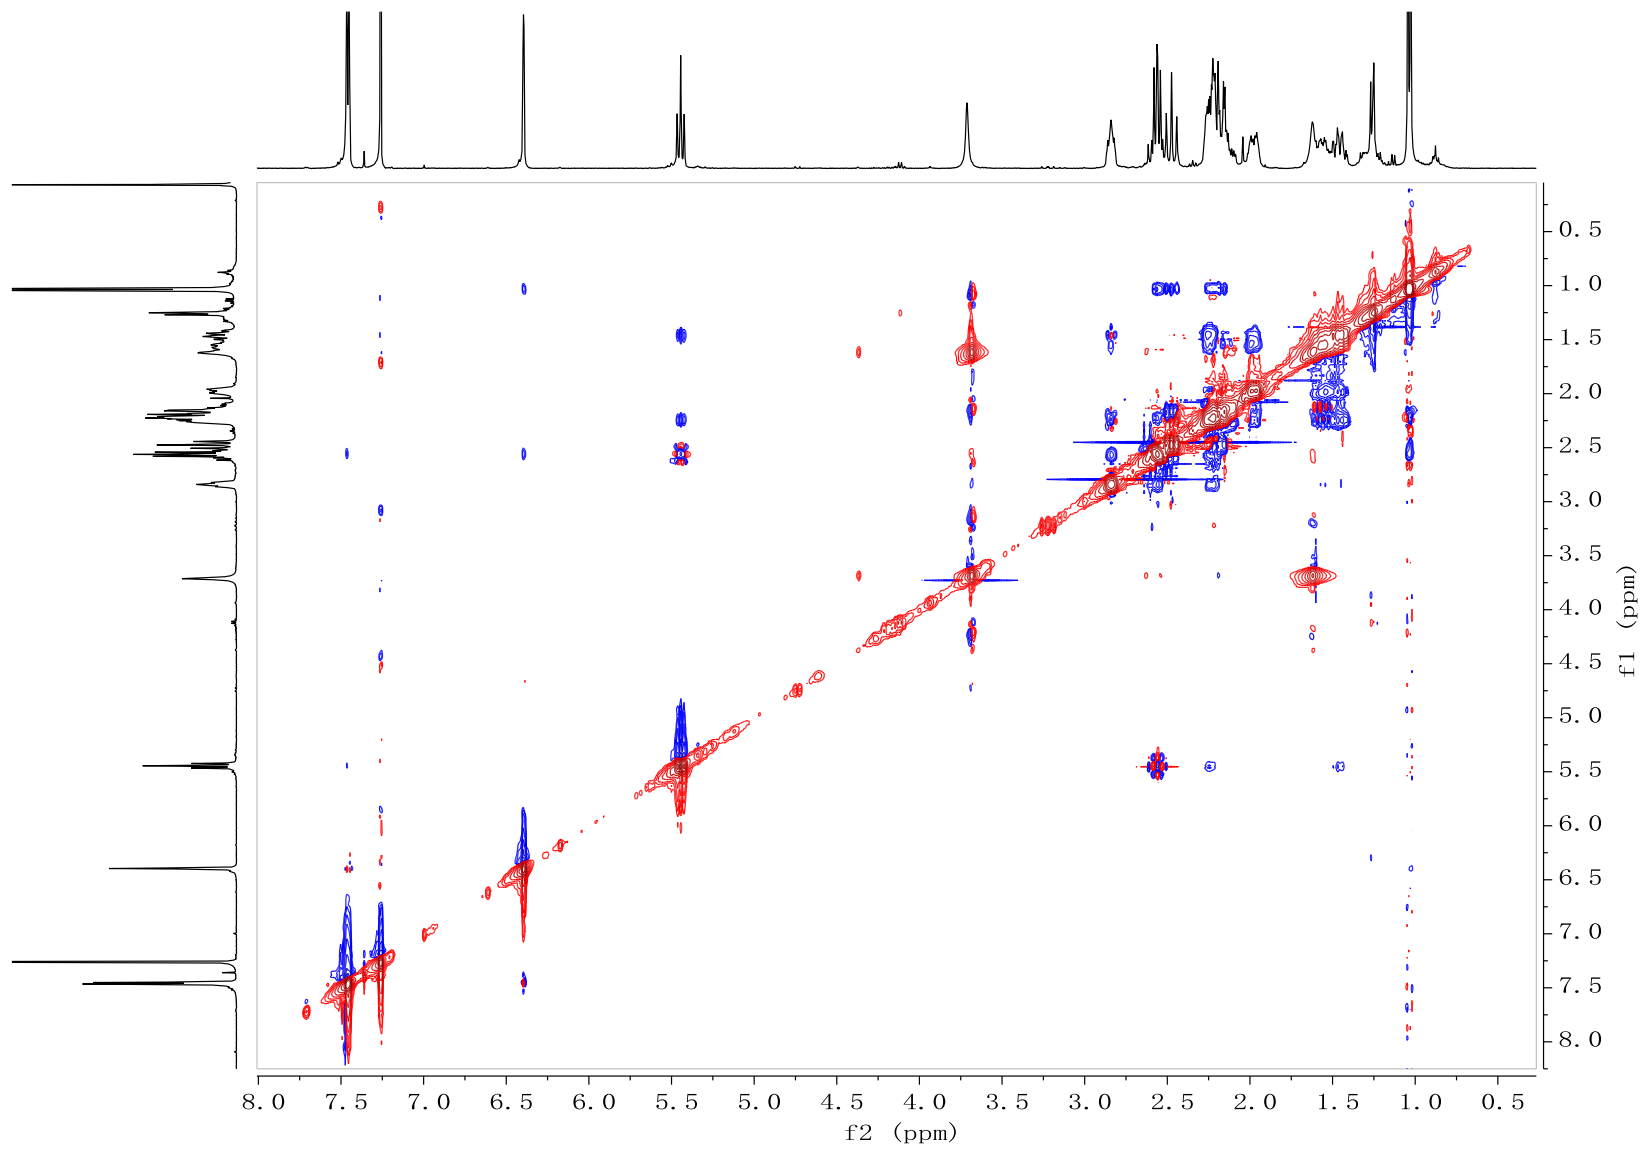

3) Compound 30  
COSY

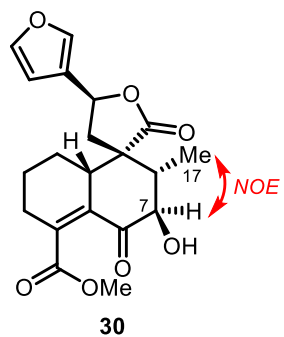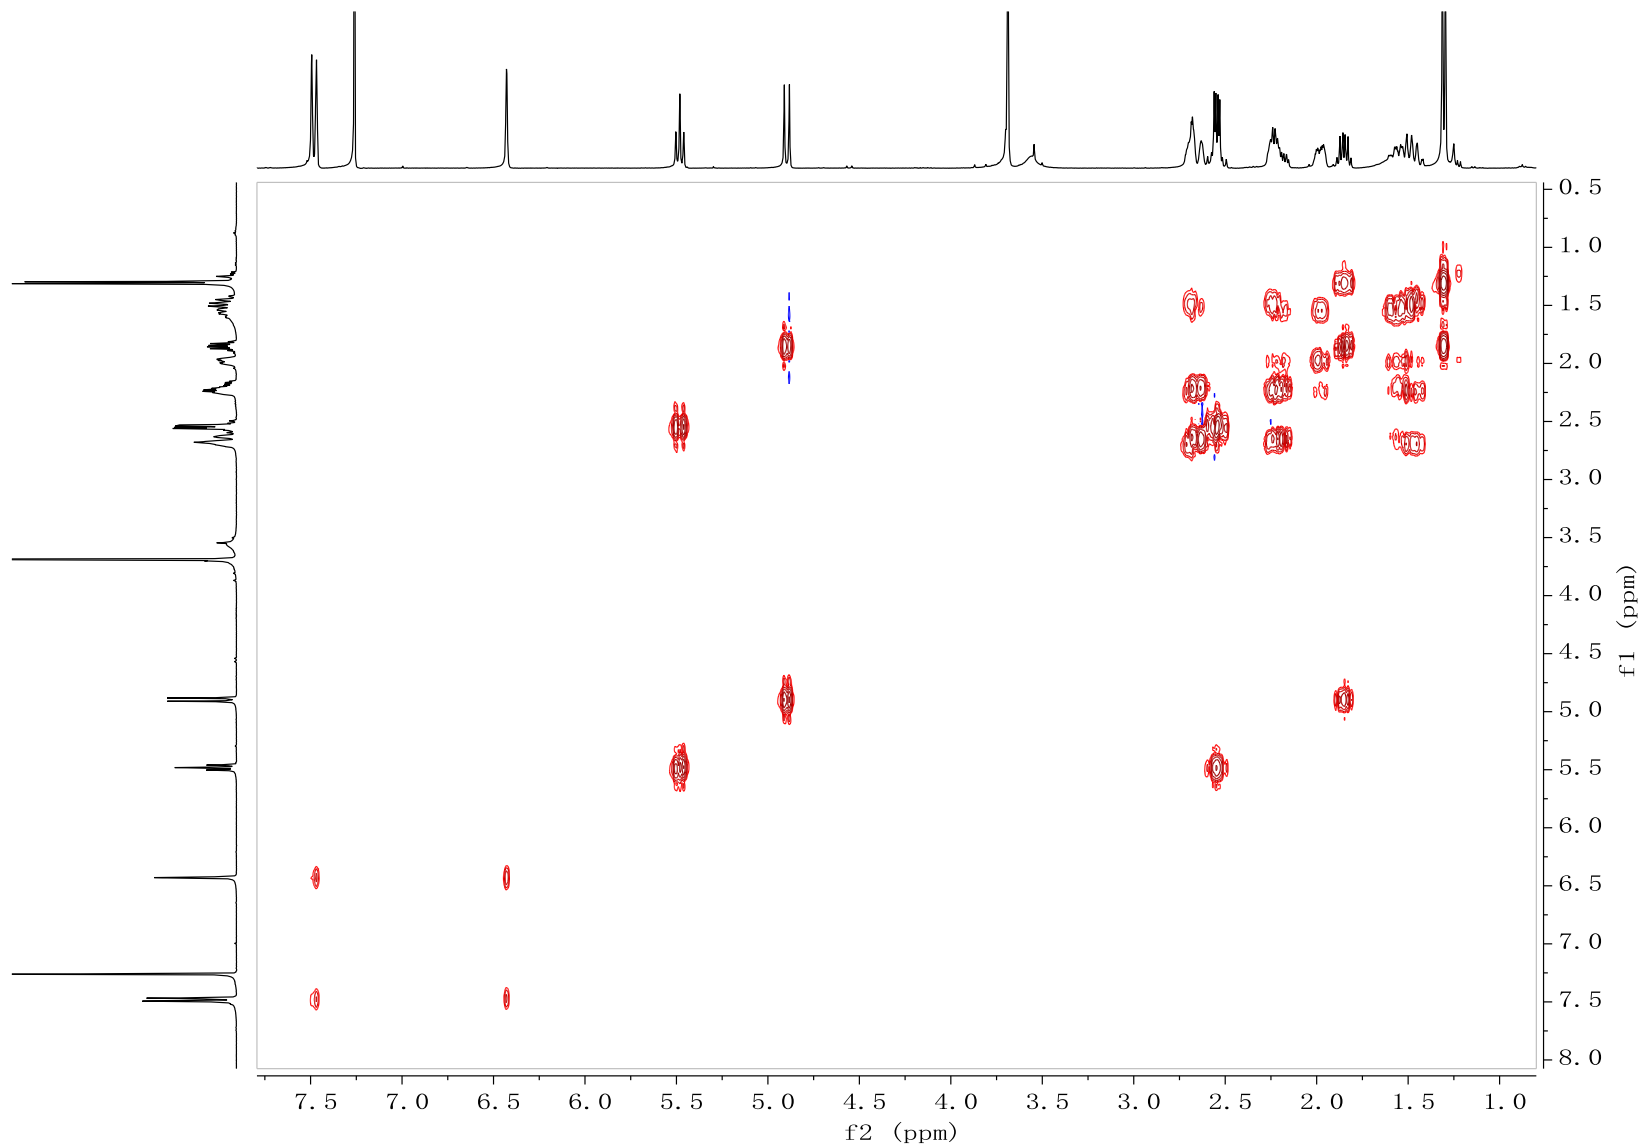

HSQC

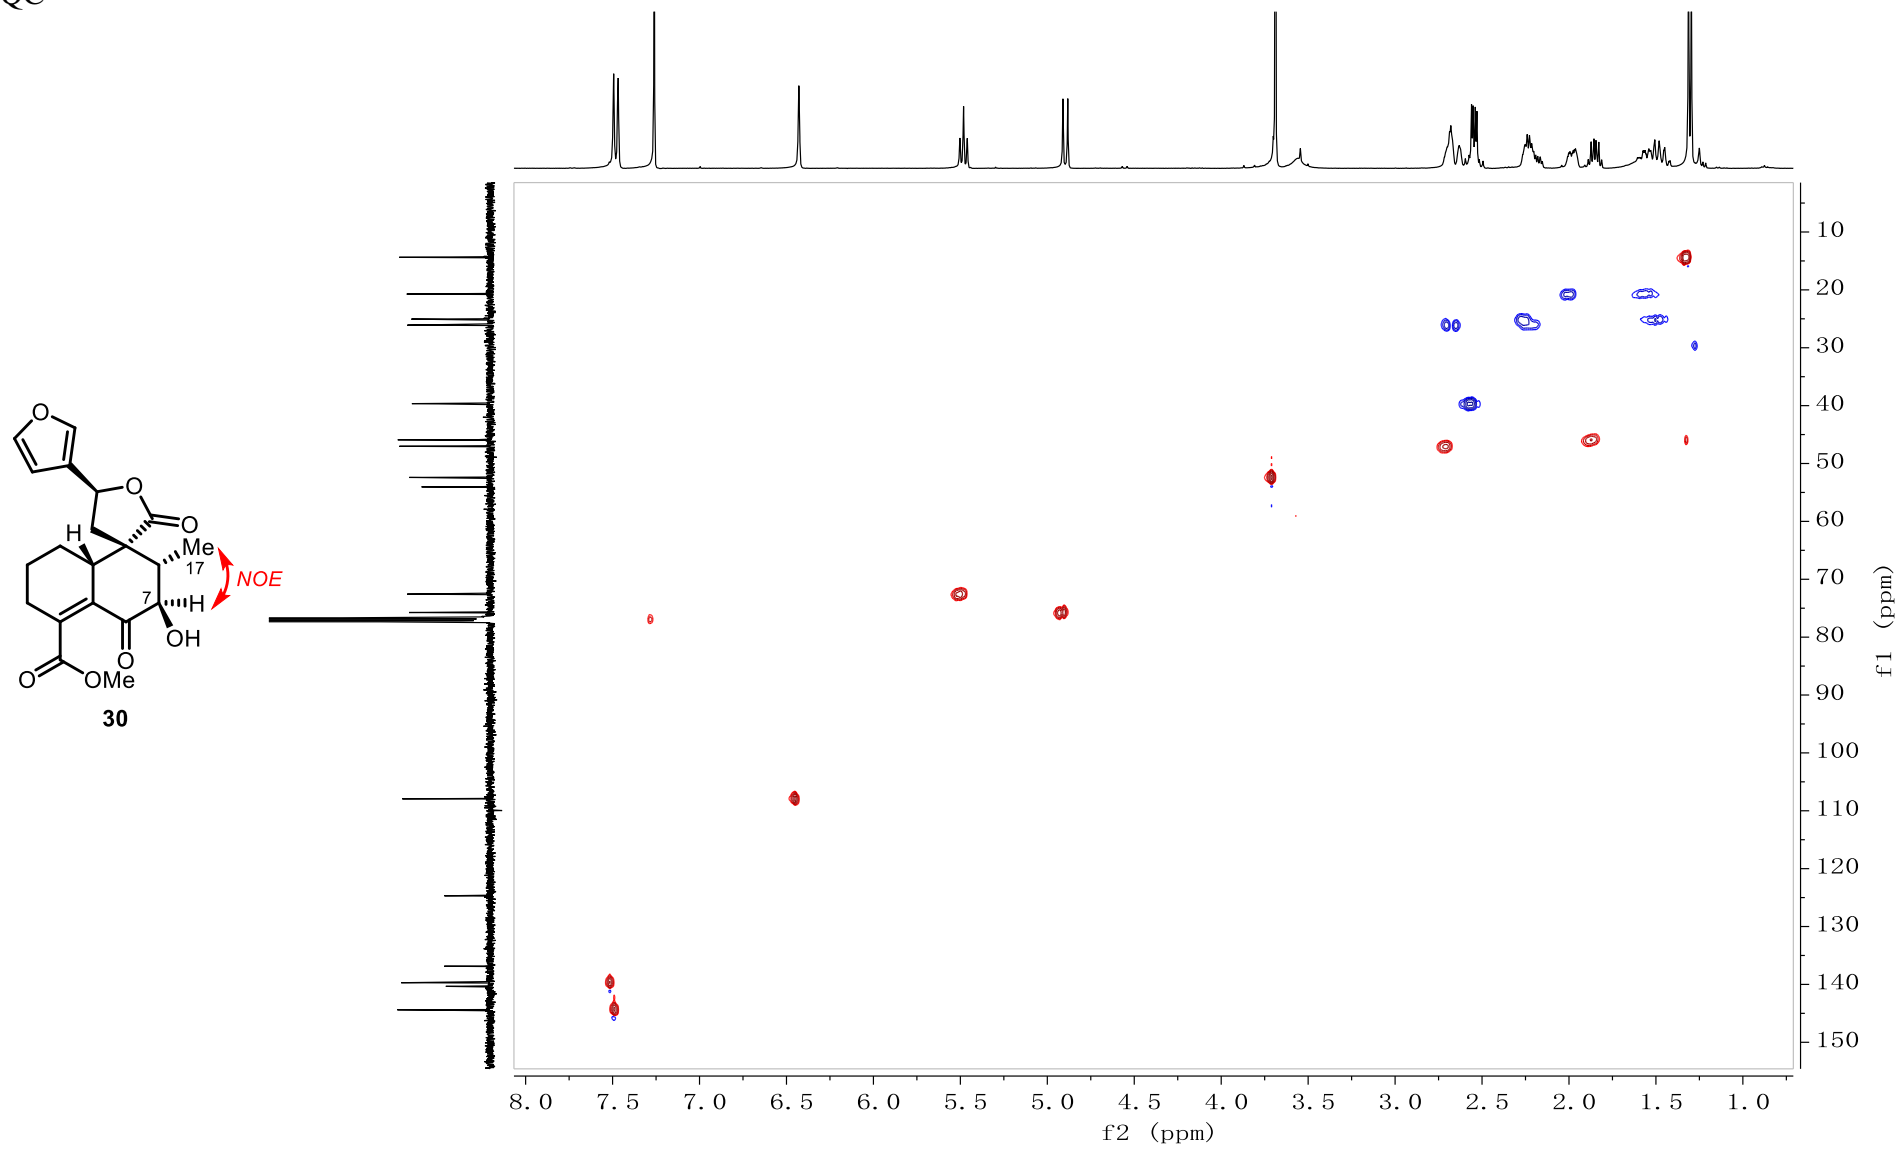

NOESY

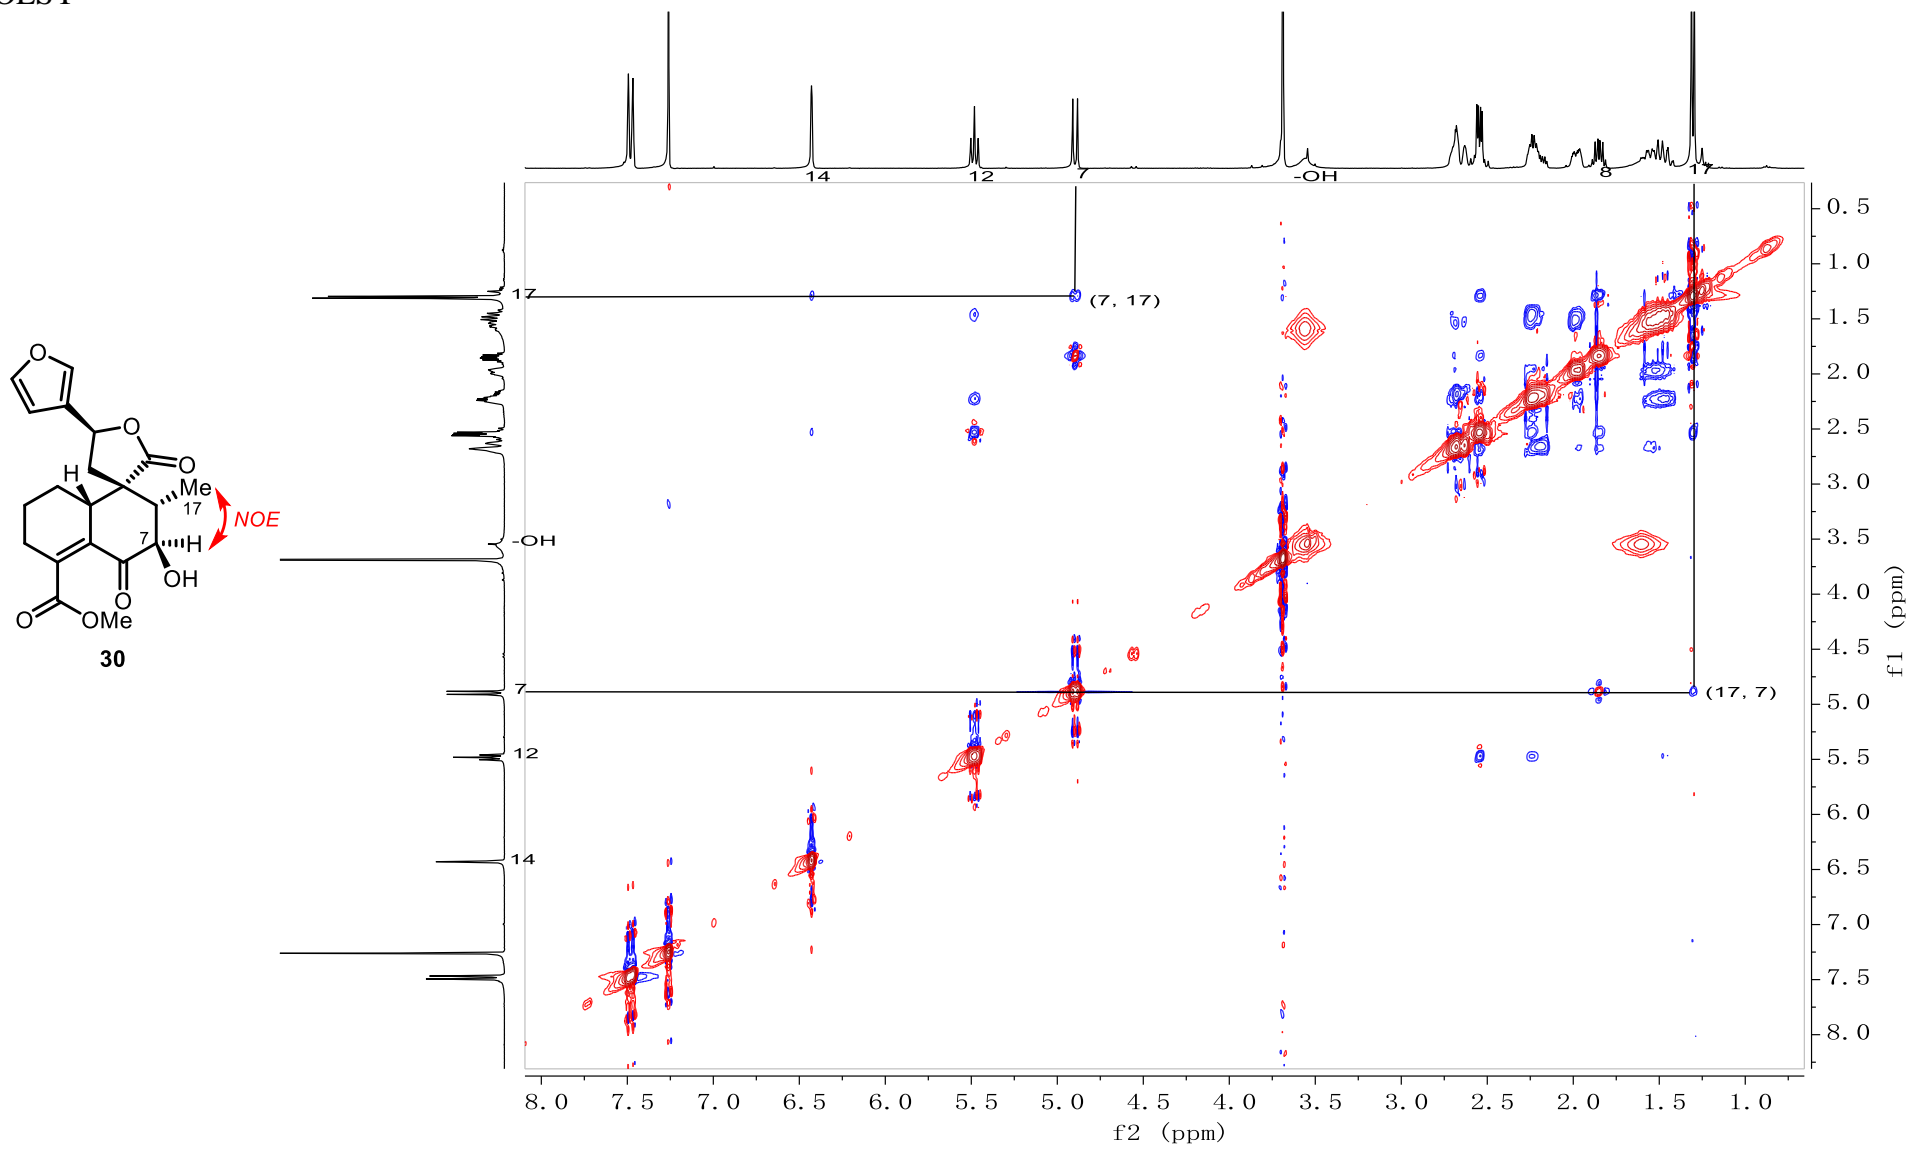

4) (+)-Cracrosone E (7)  
COSY

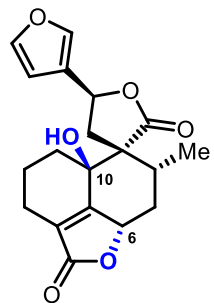

(+)-cracrosone E (7)

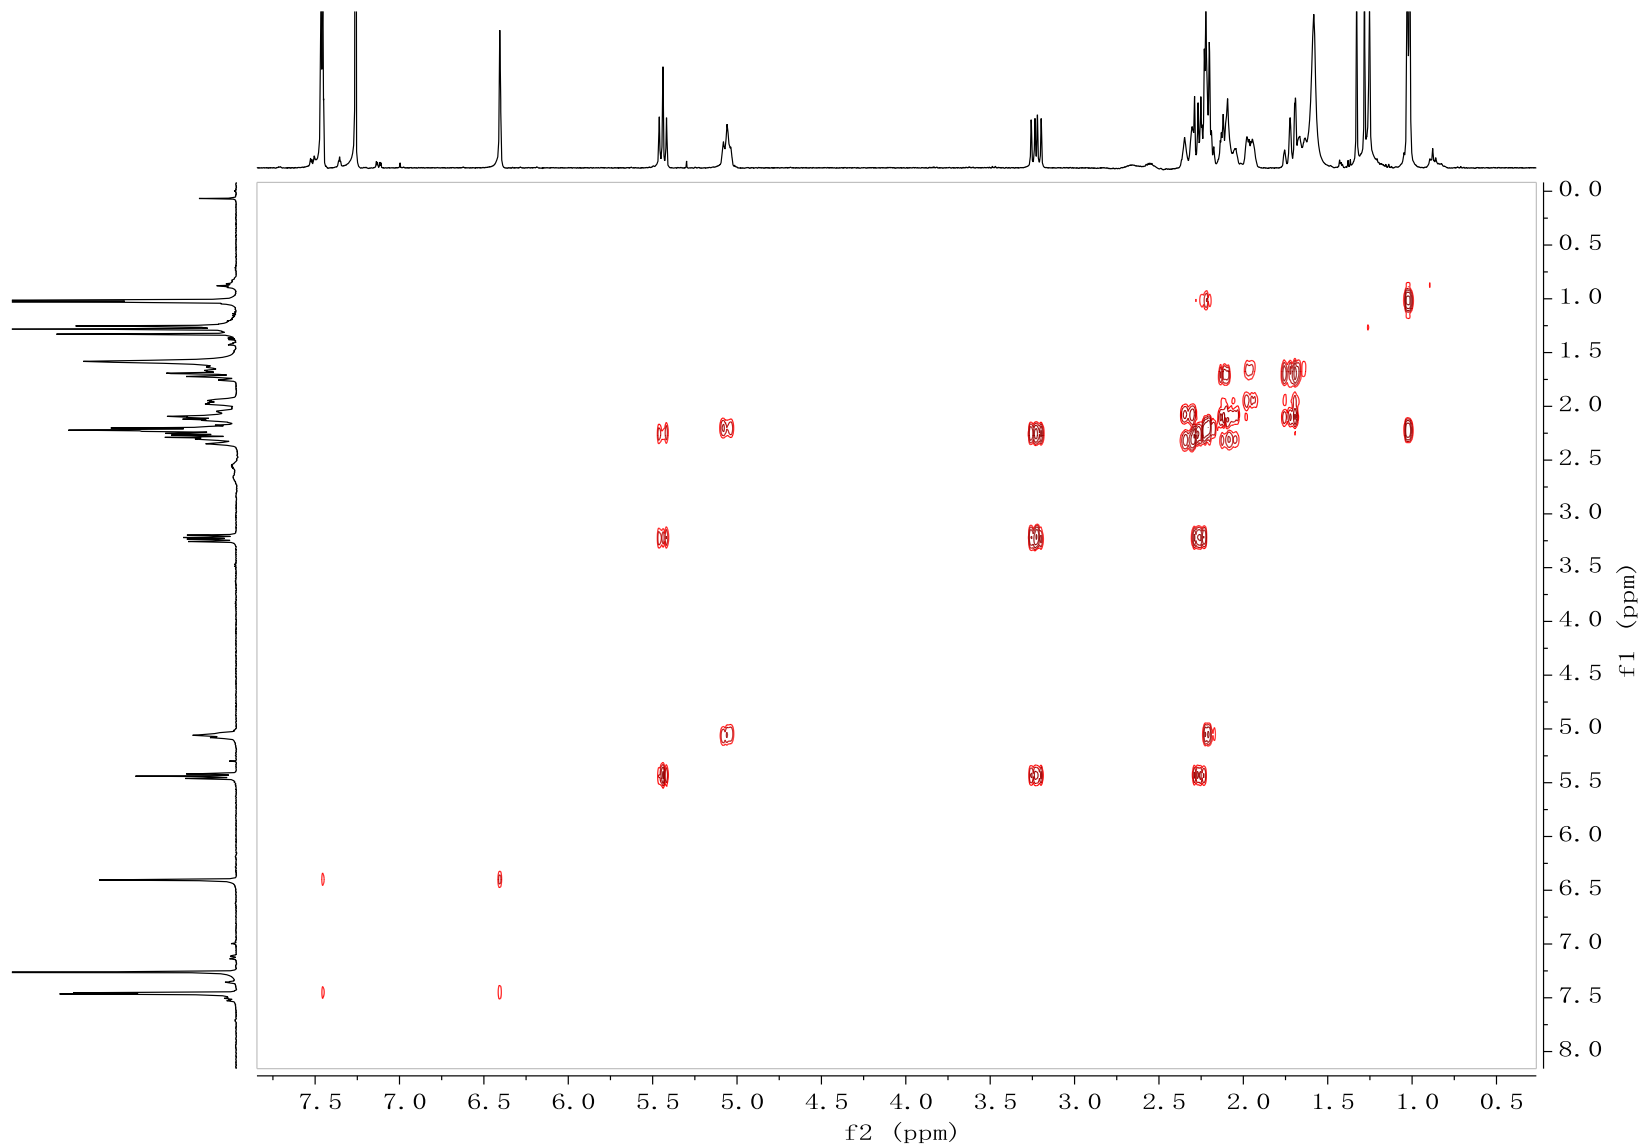

# HSQC

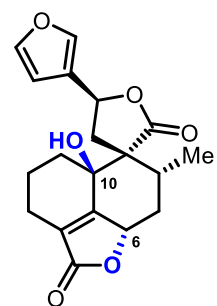

(+)-cracoson E (7)

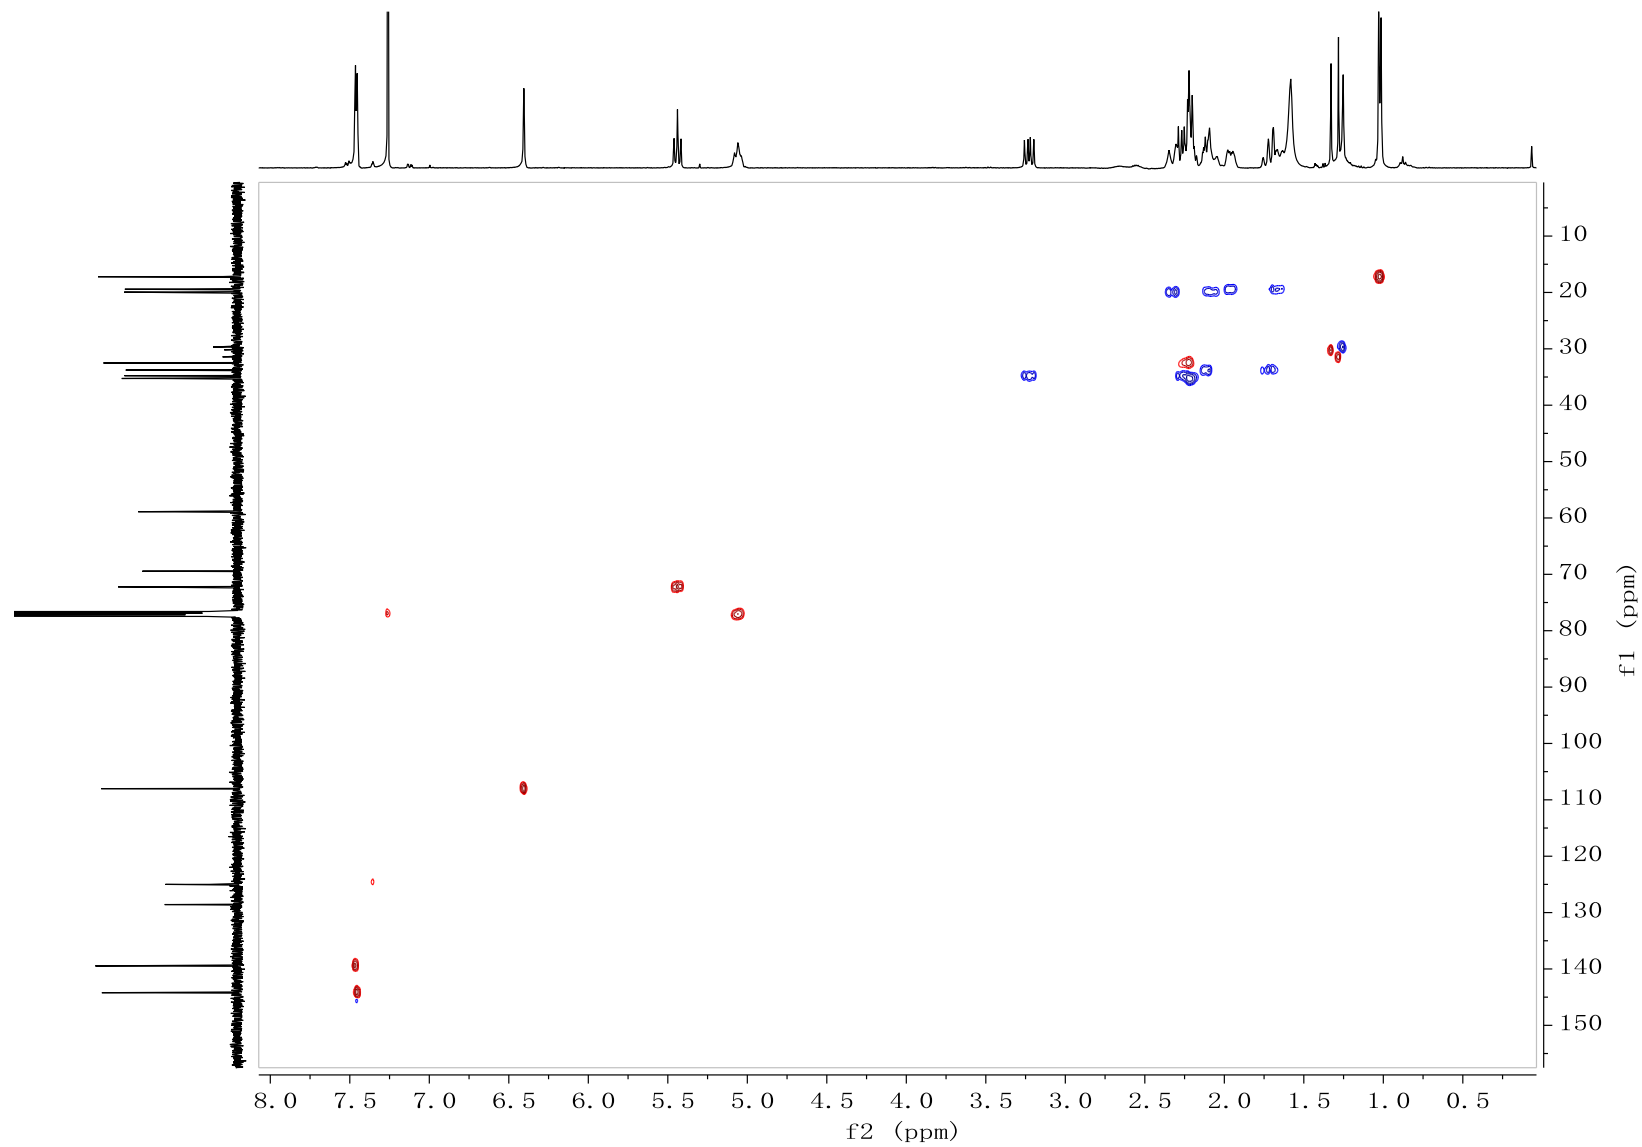



# HMBC

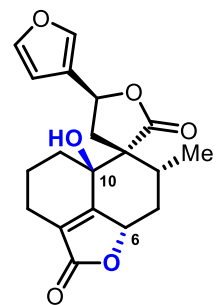

(+)-cracoson E (7)

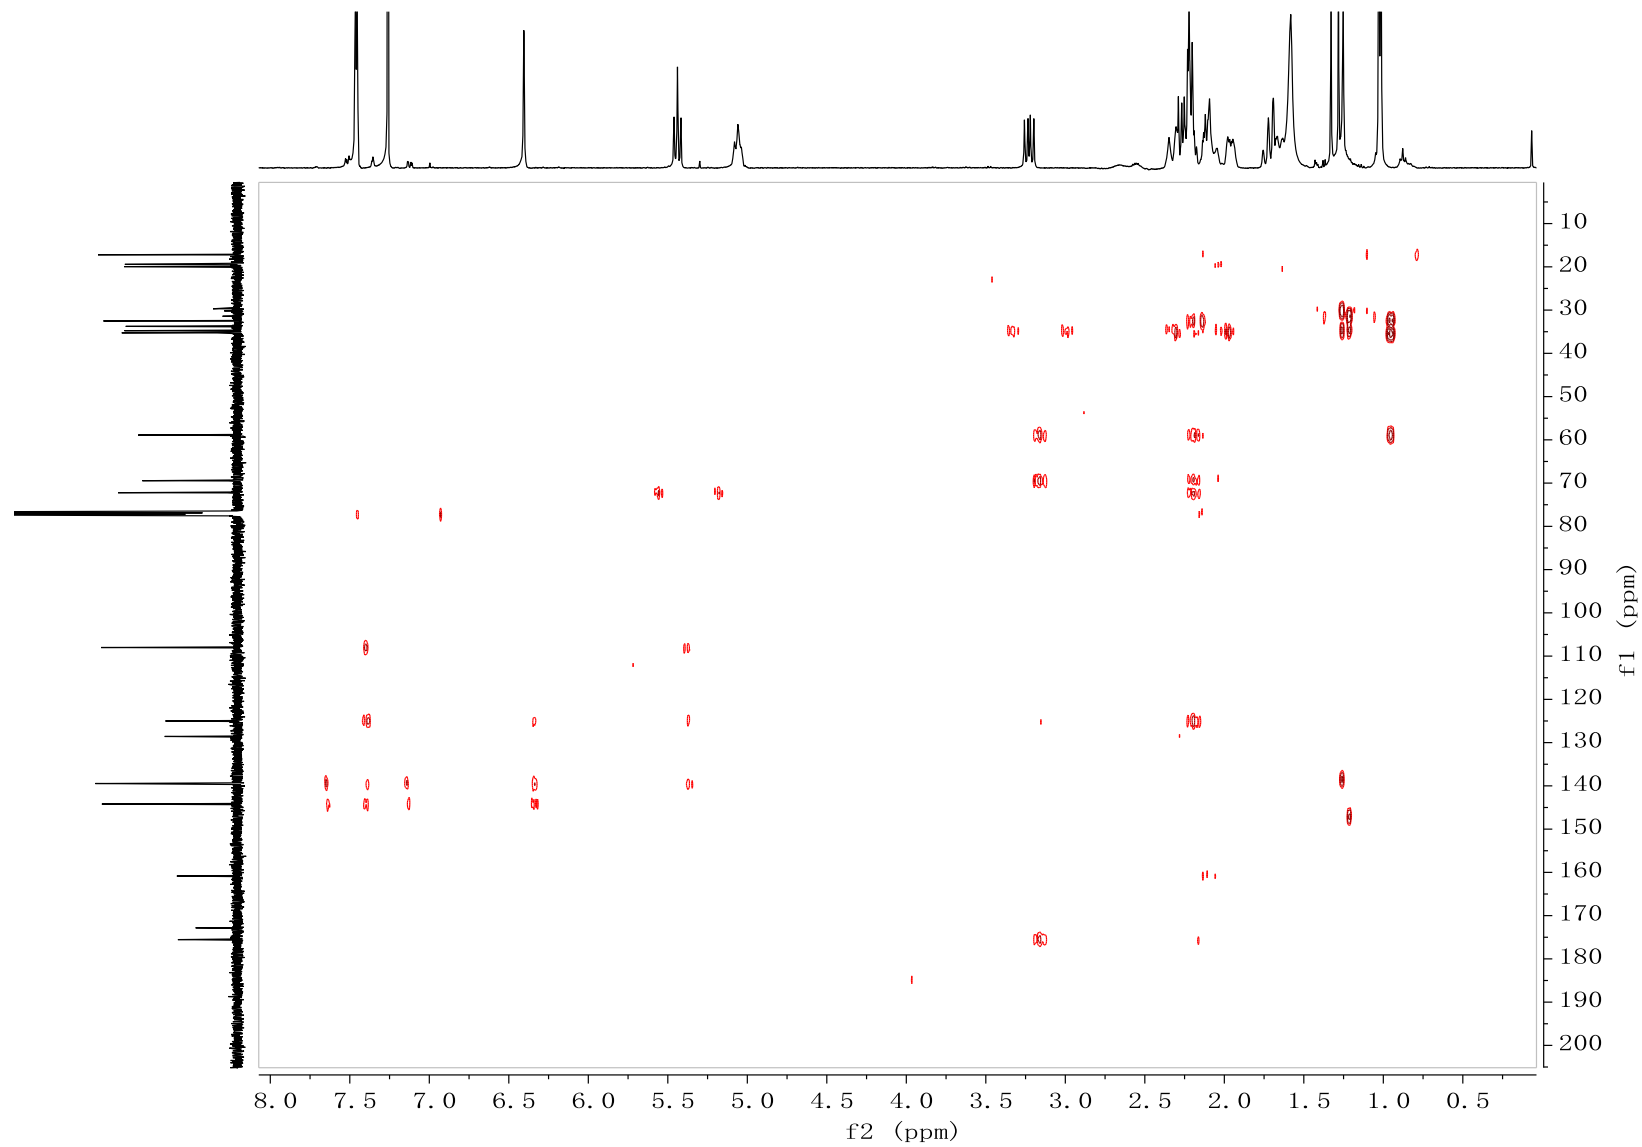

NOESY

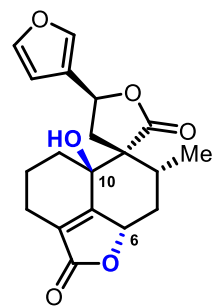

(+)-cracrosone E (7)

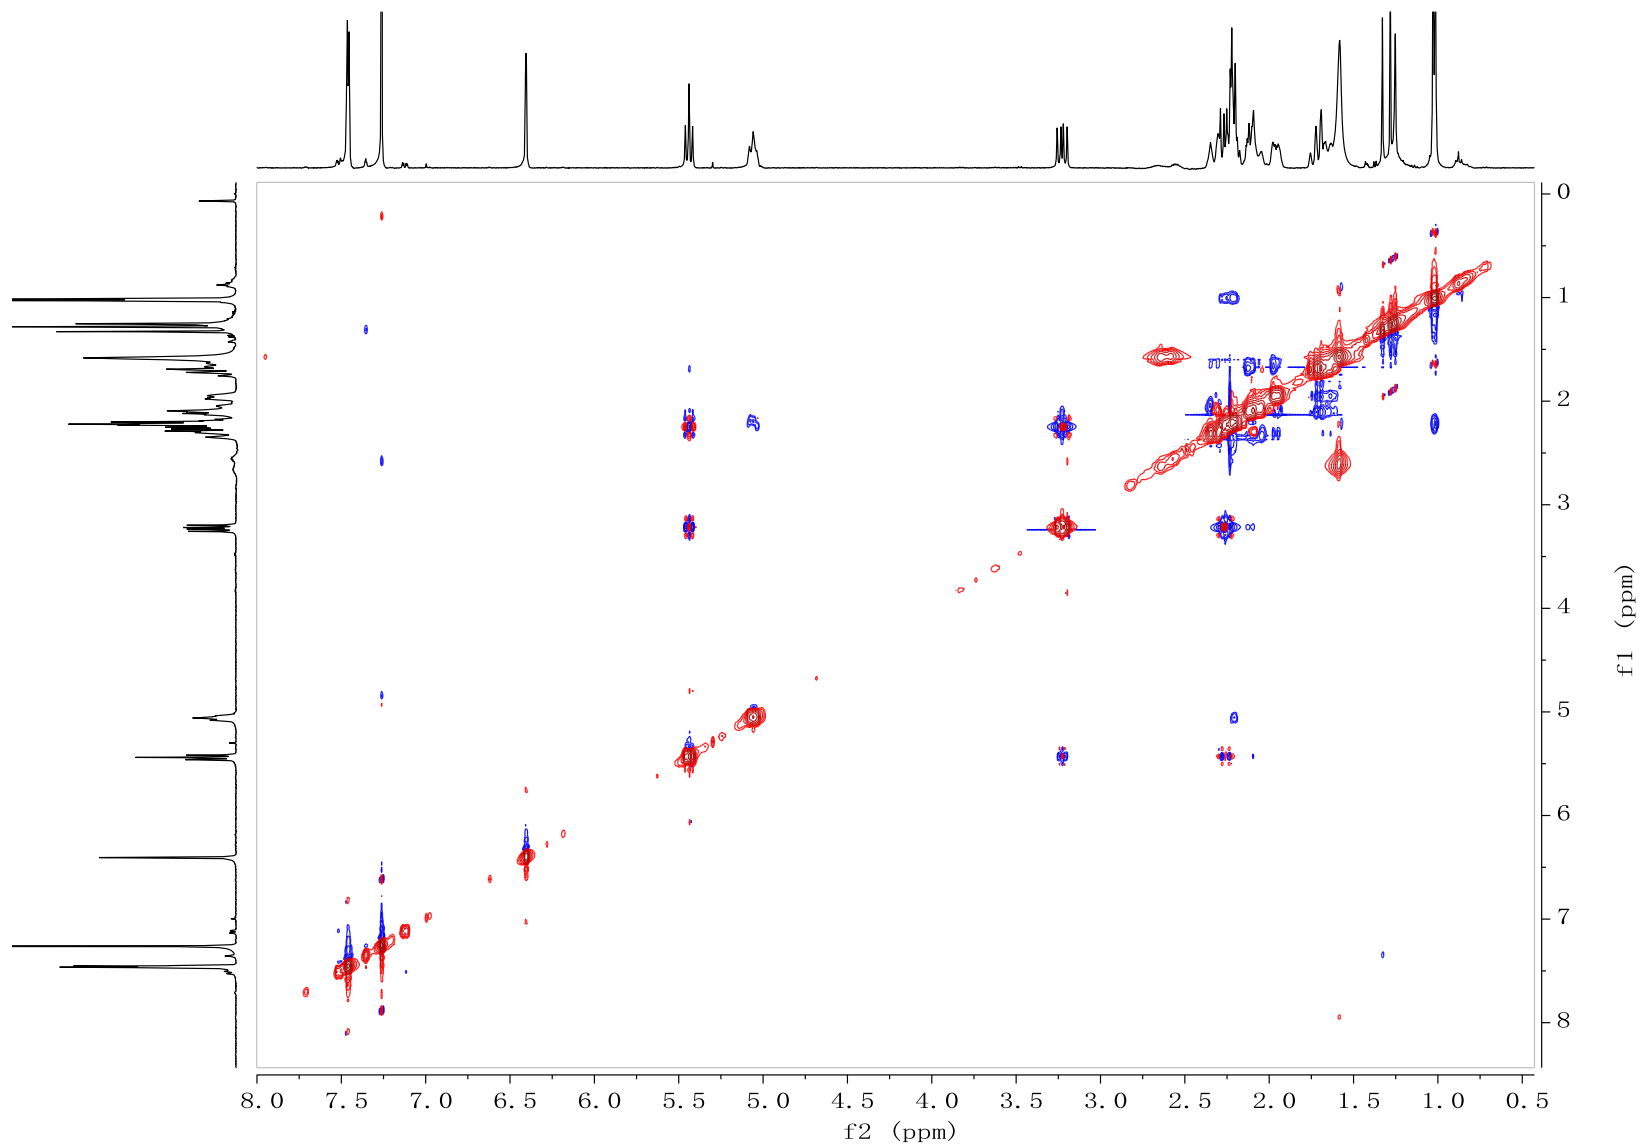

### 13. Copies of NMR Spectra

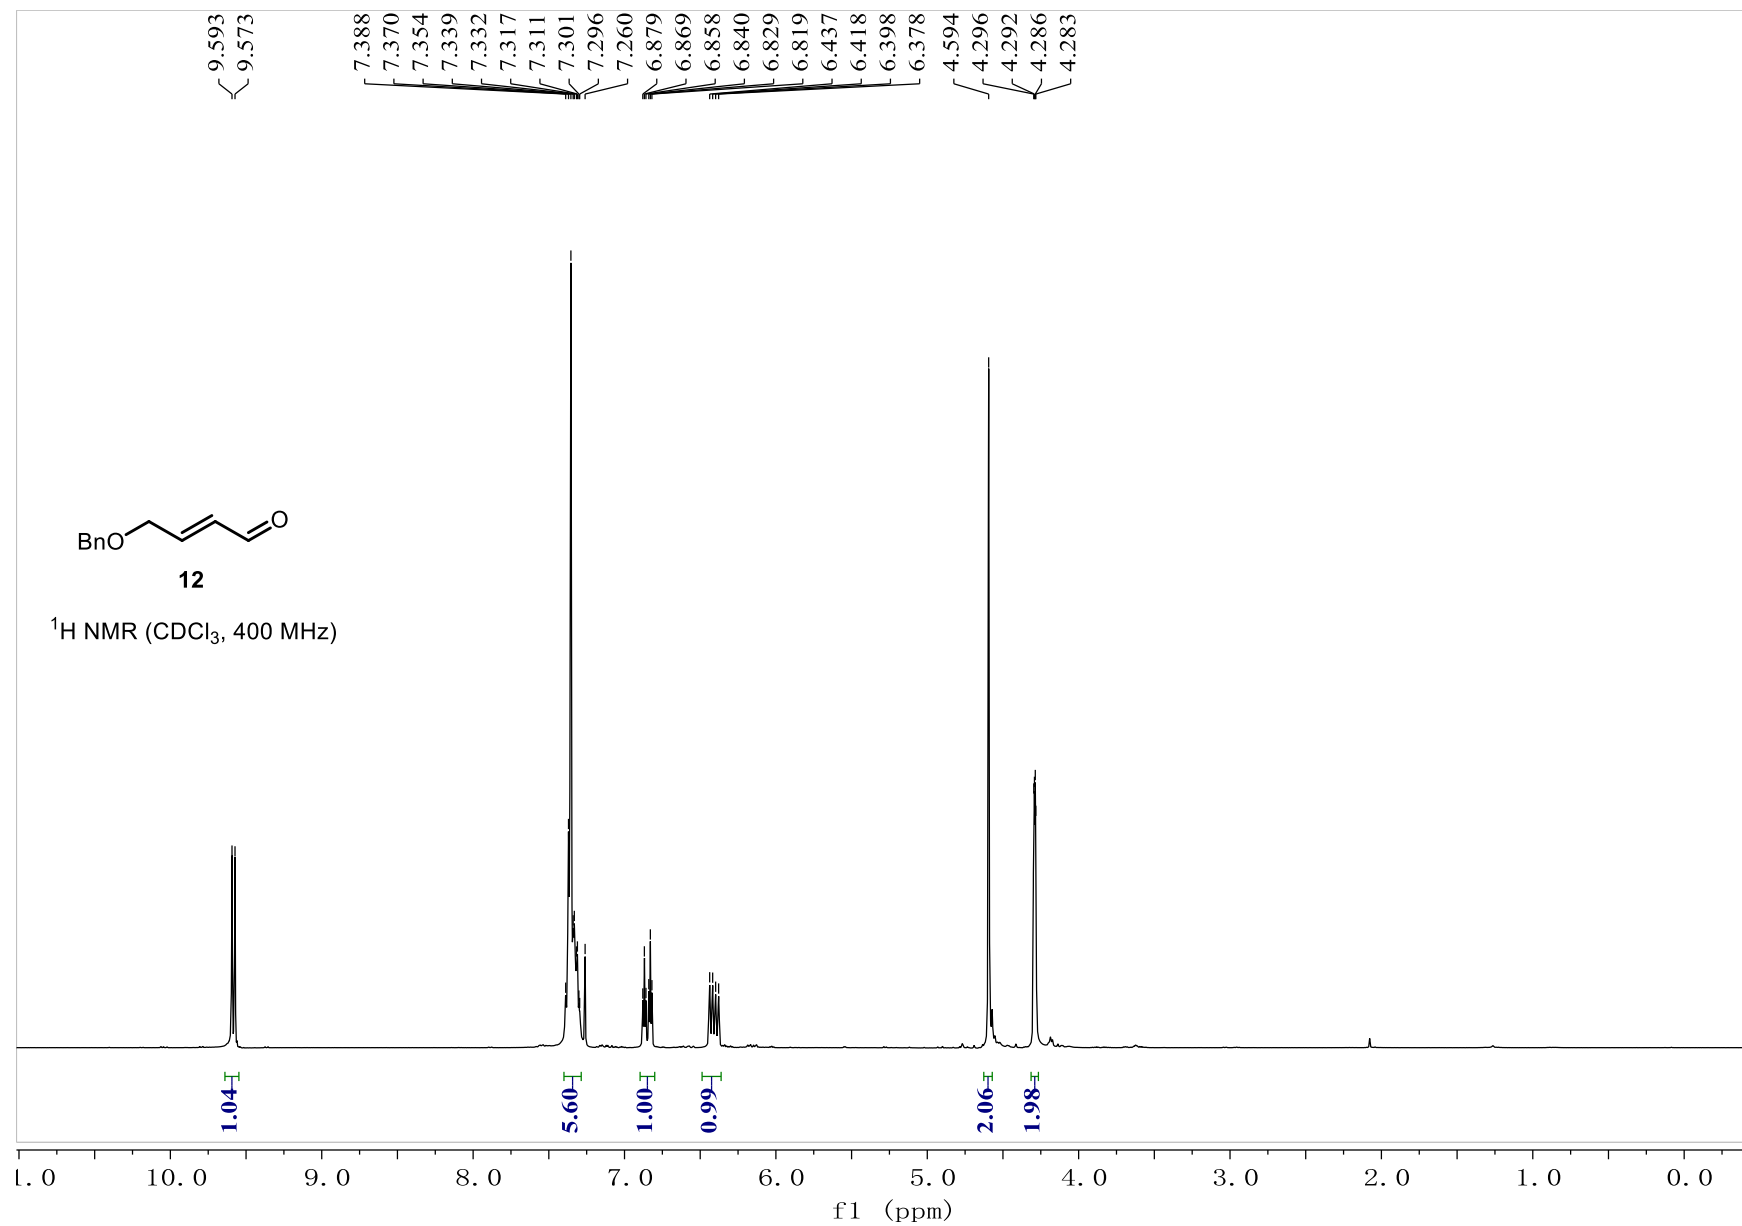

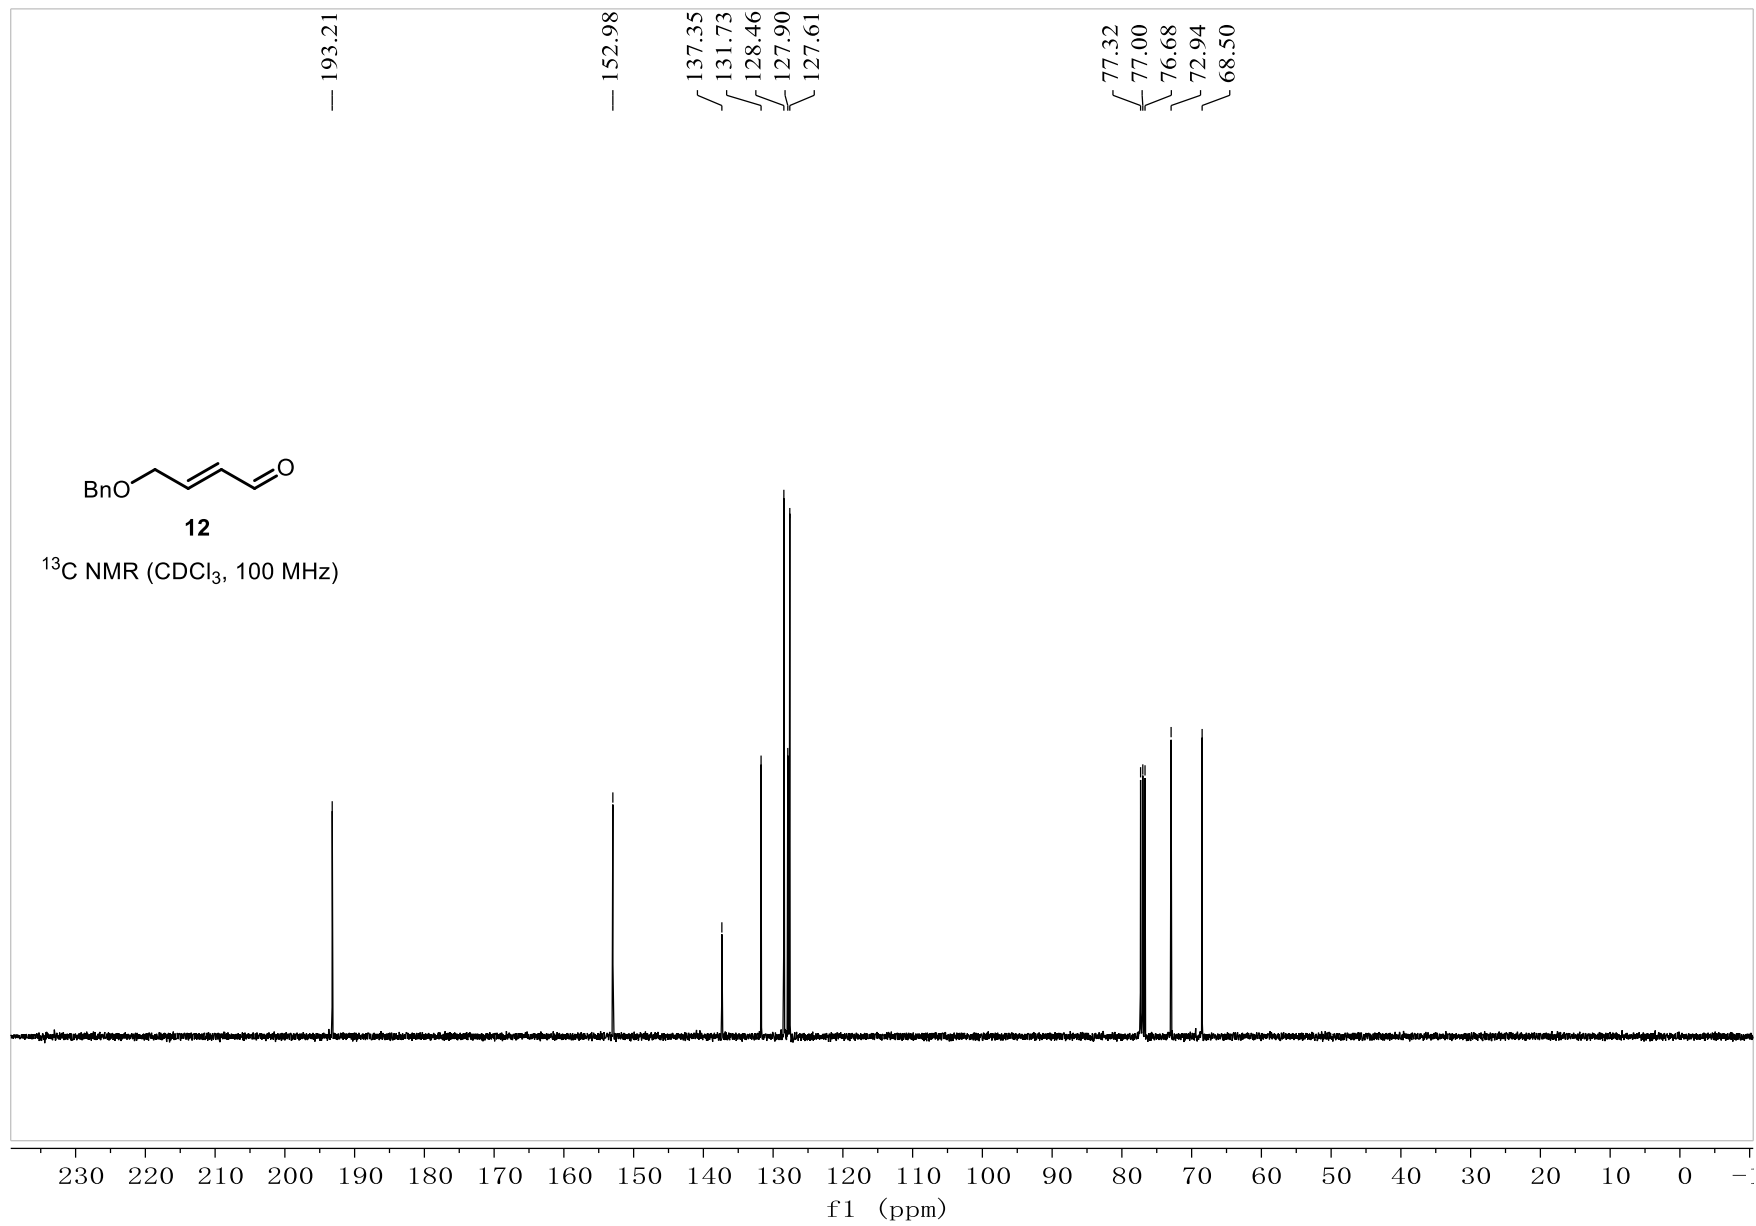

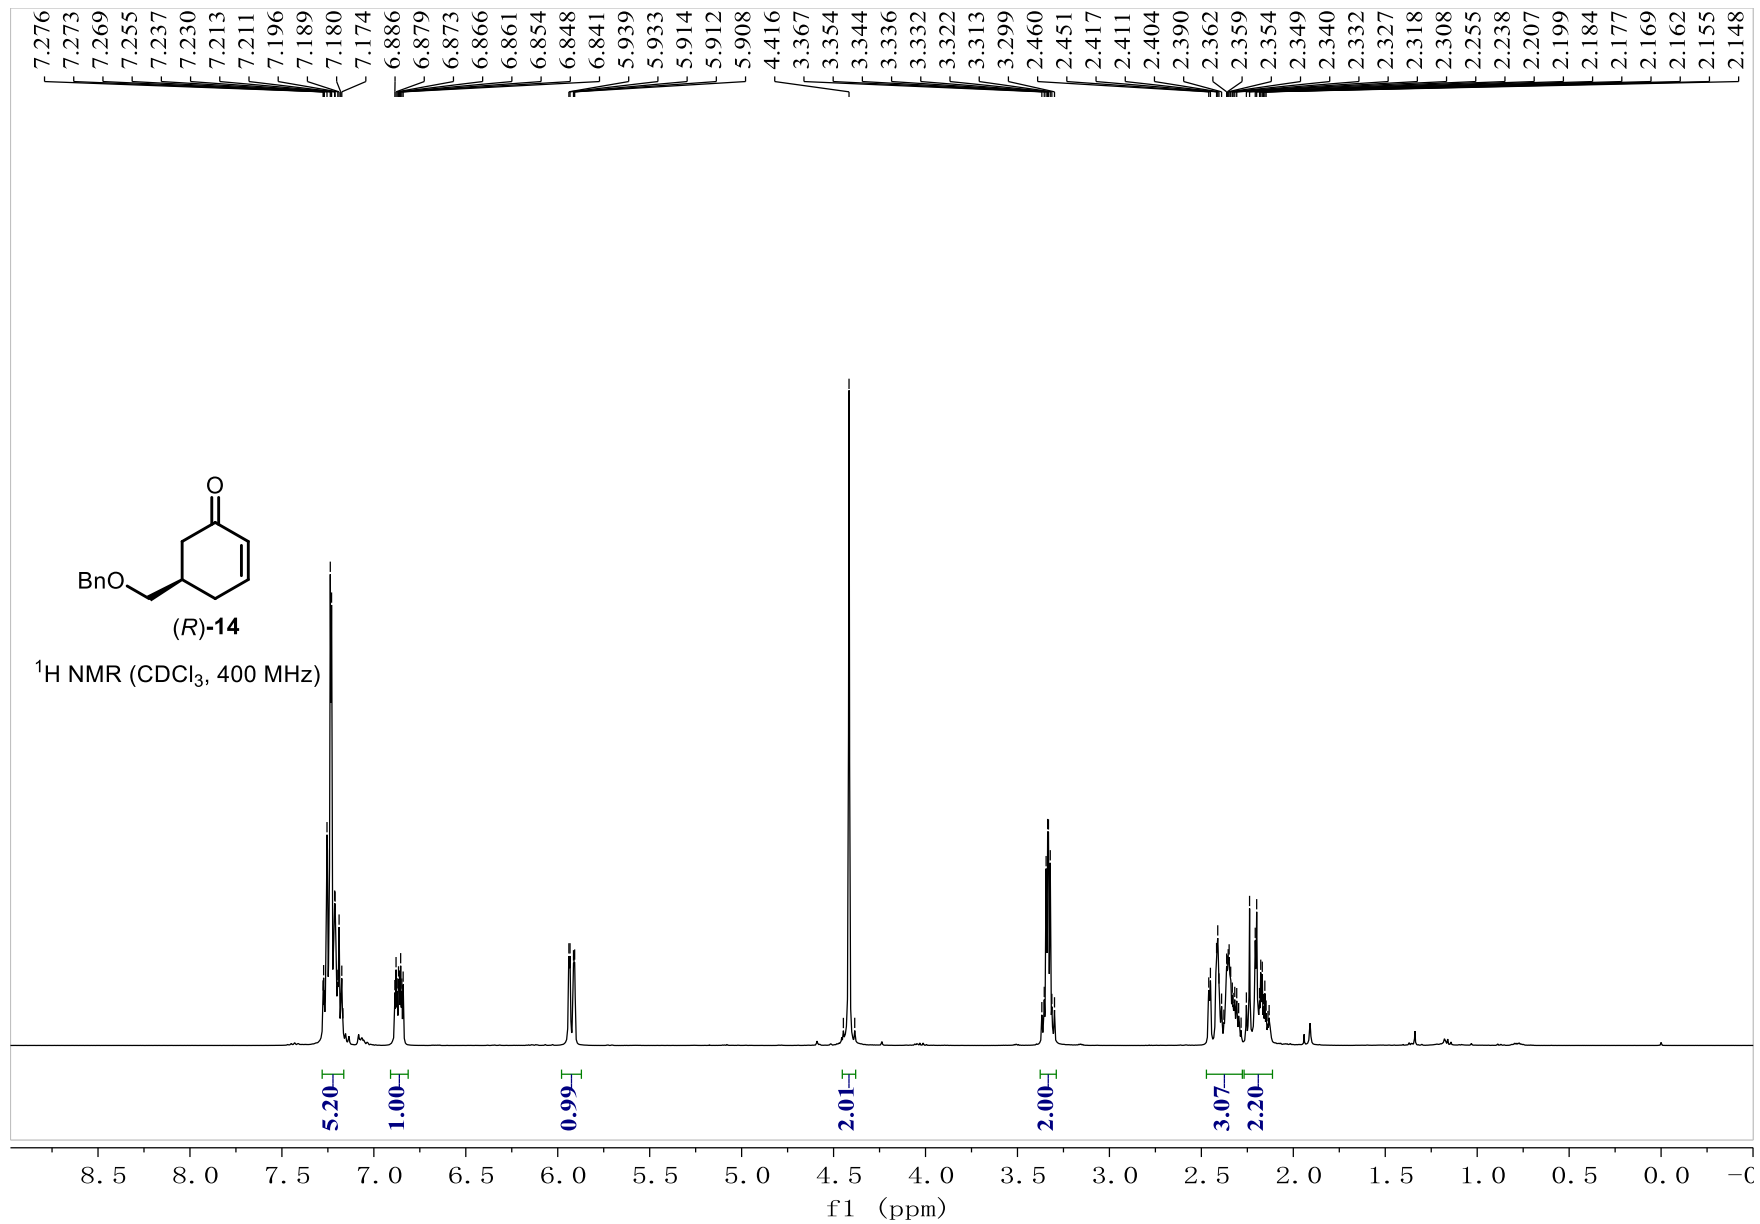

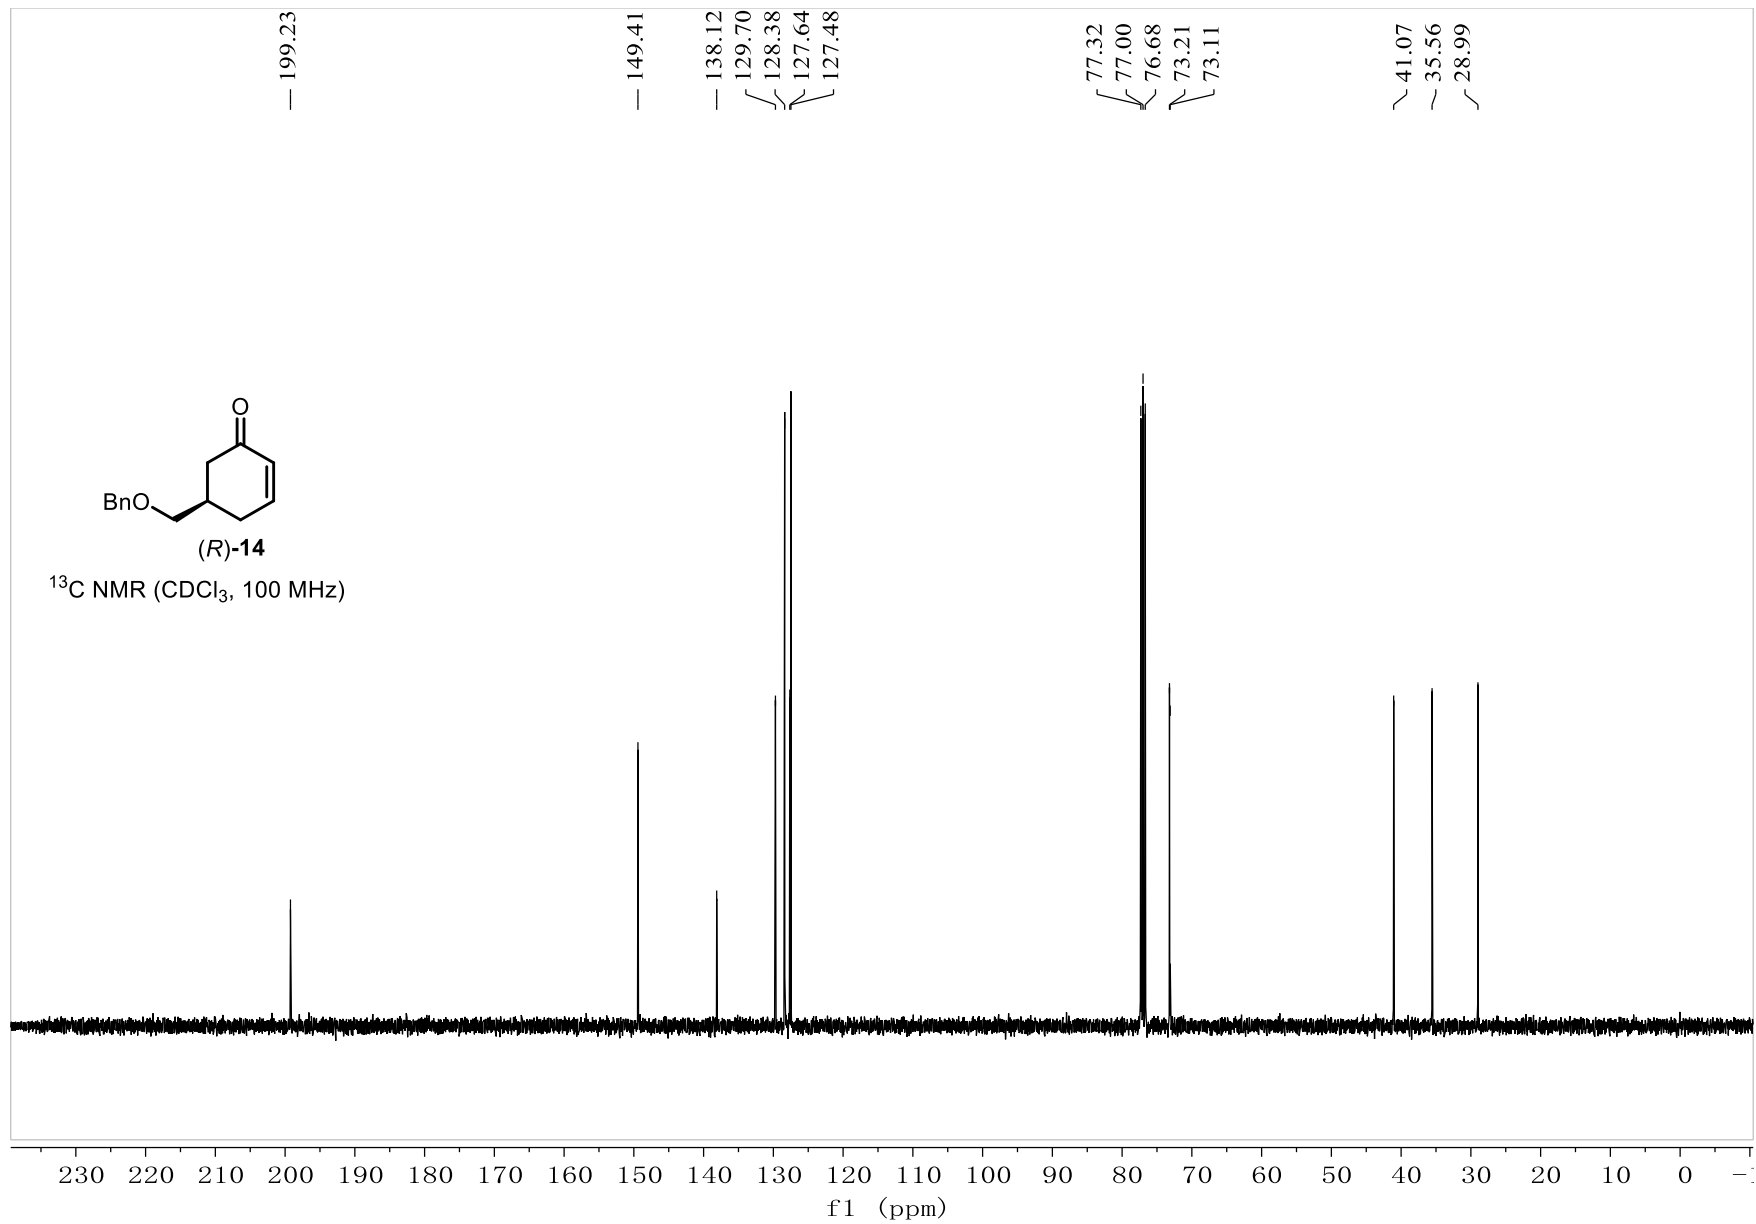

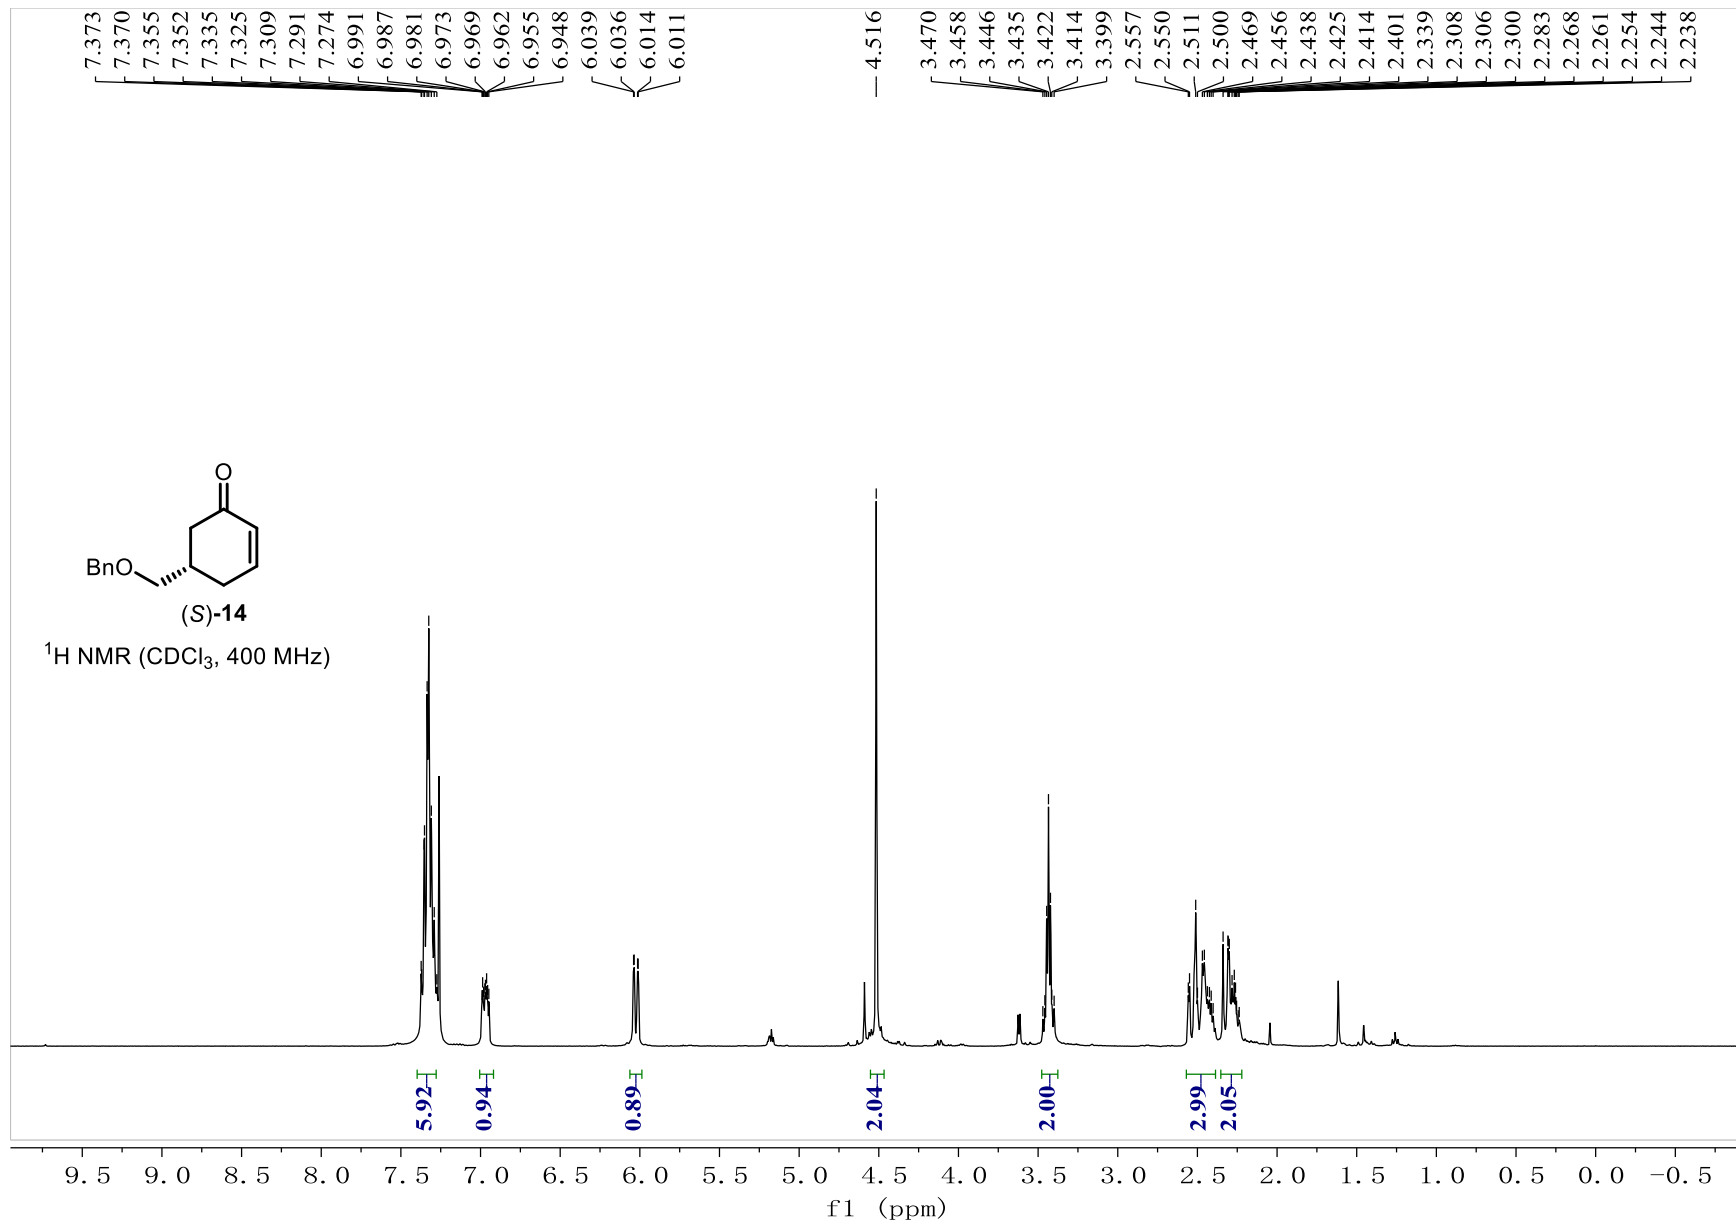

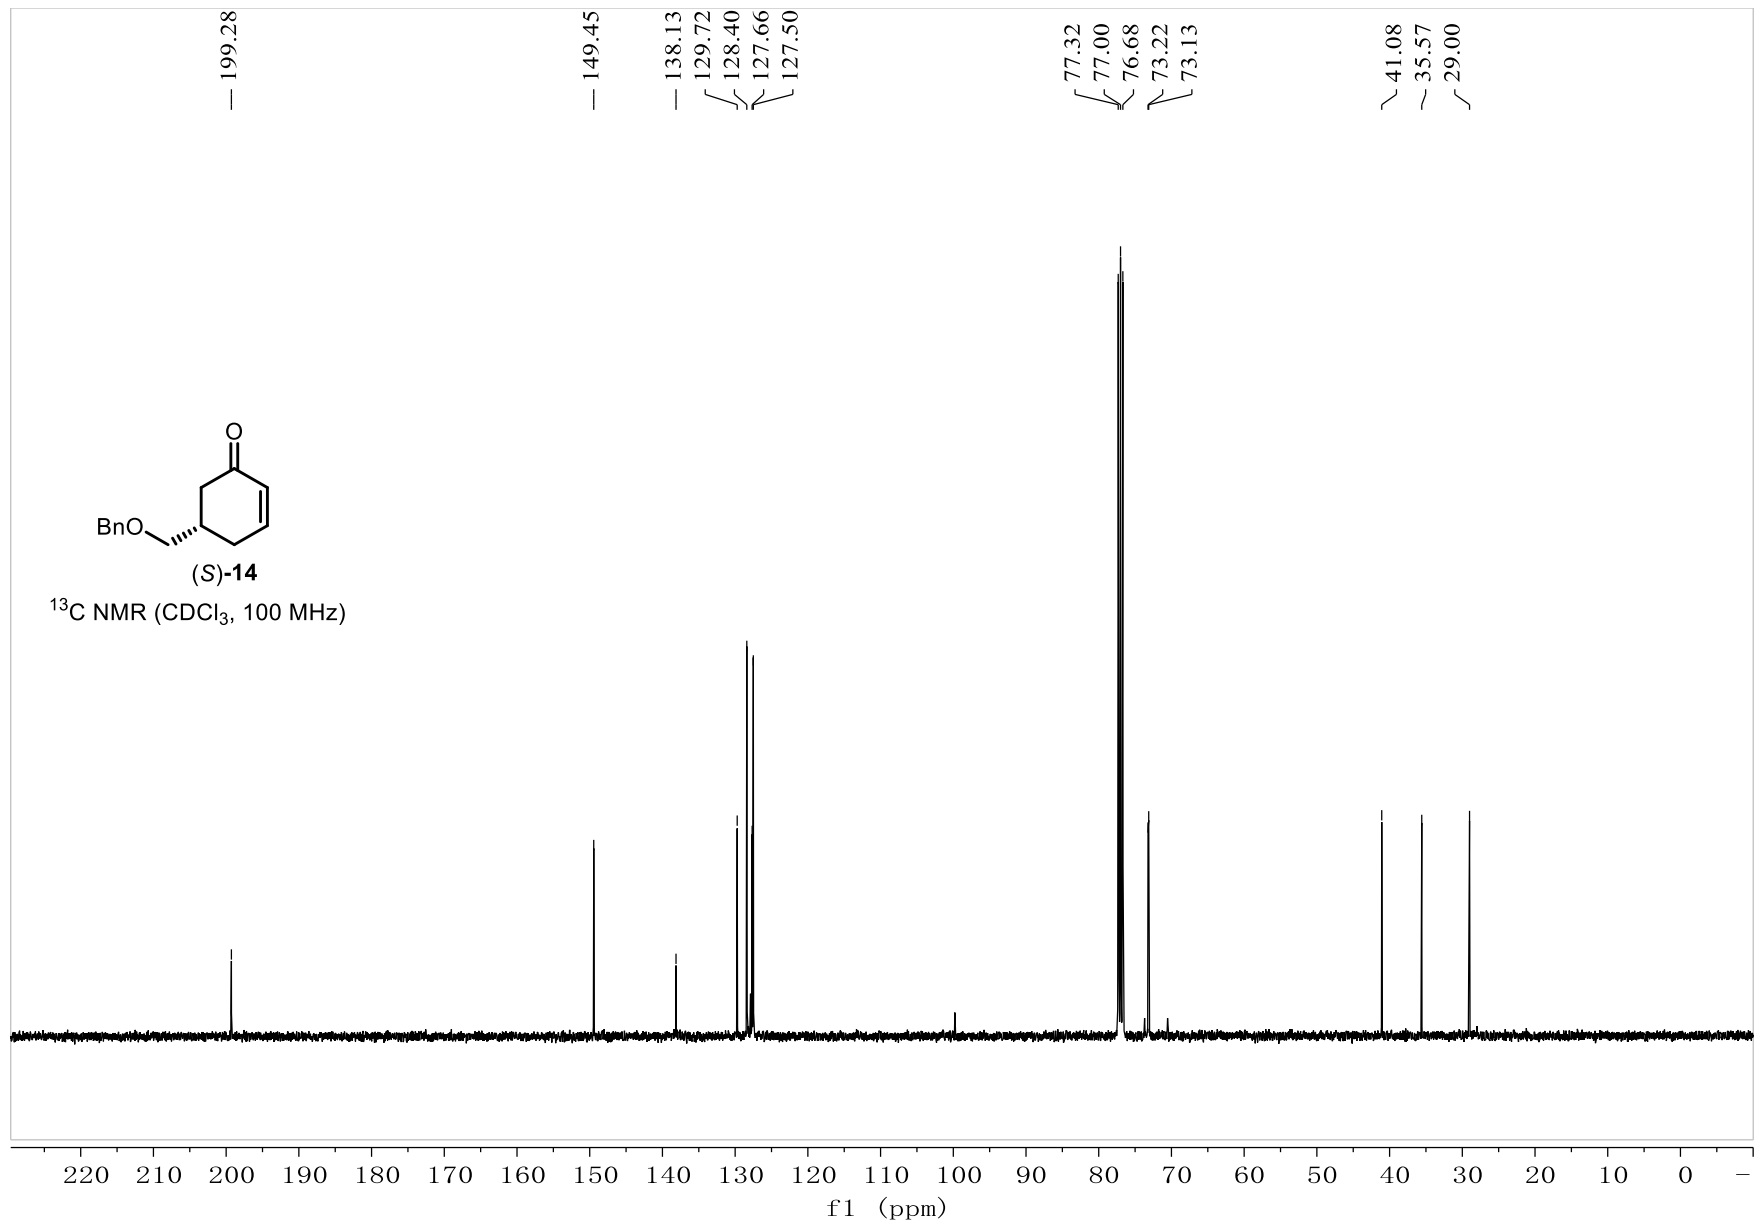



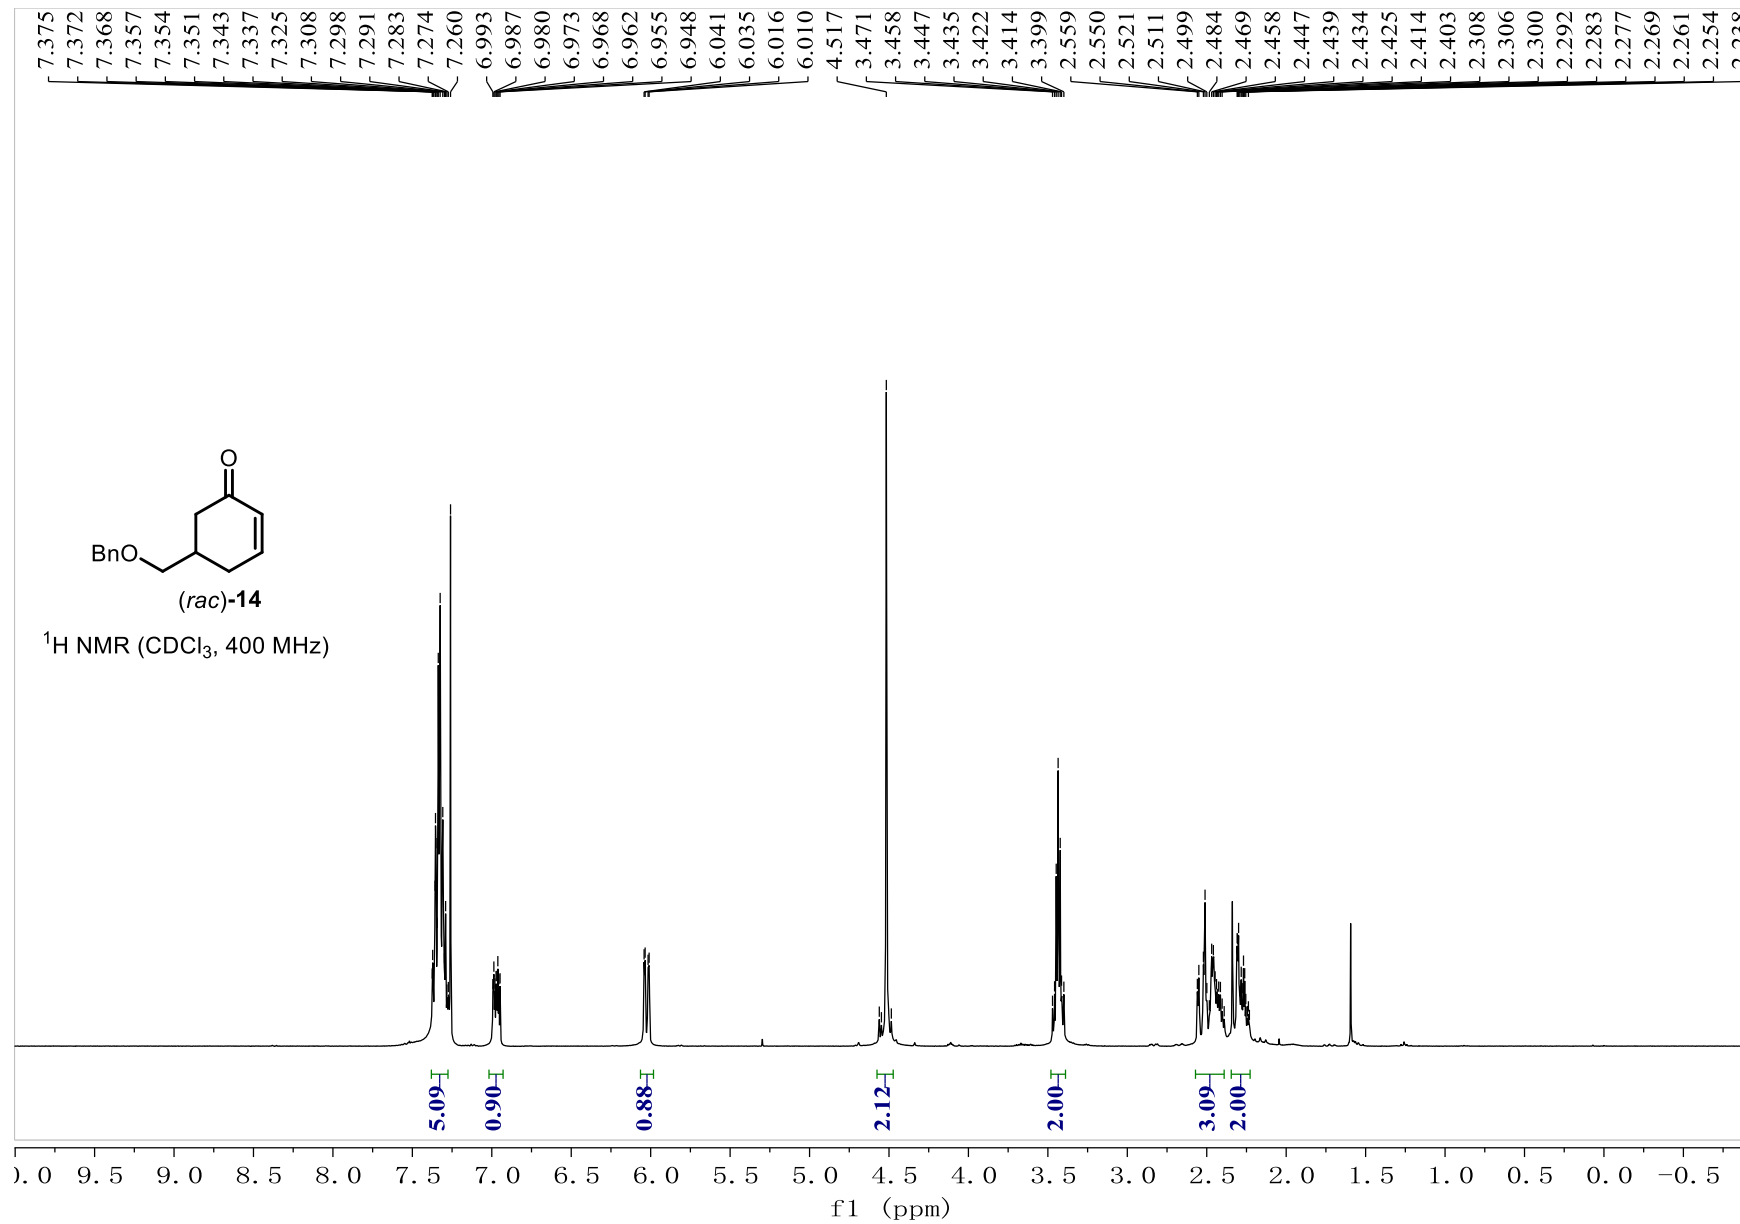

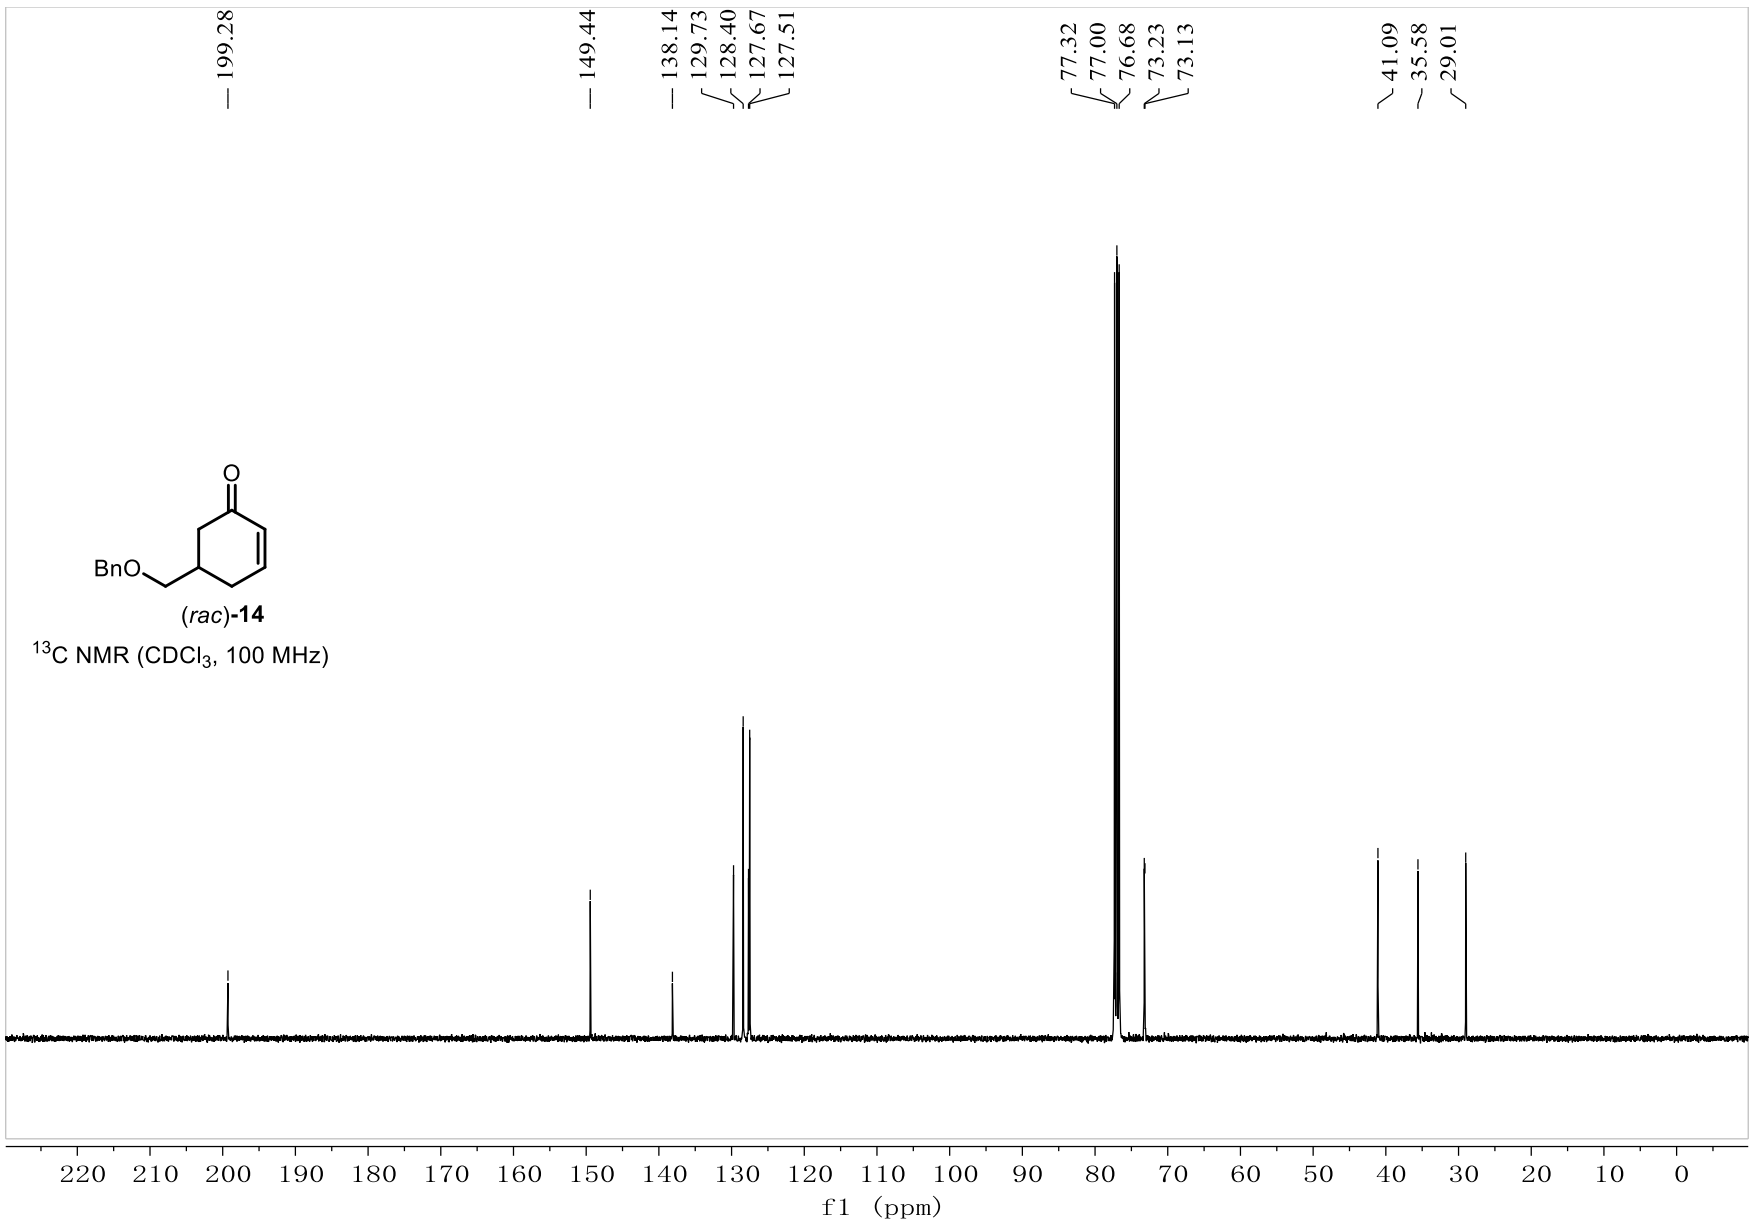

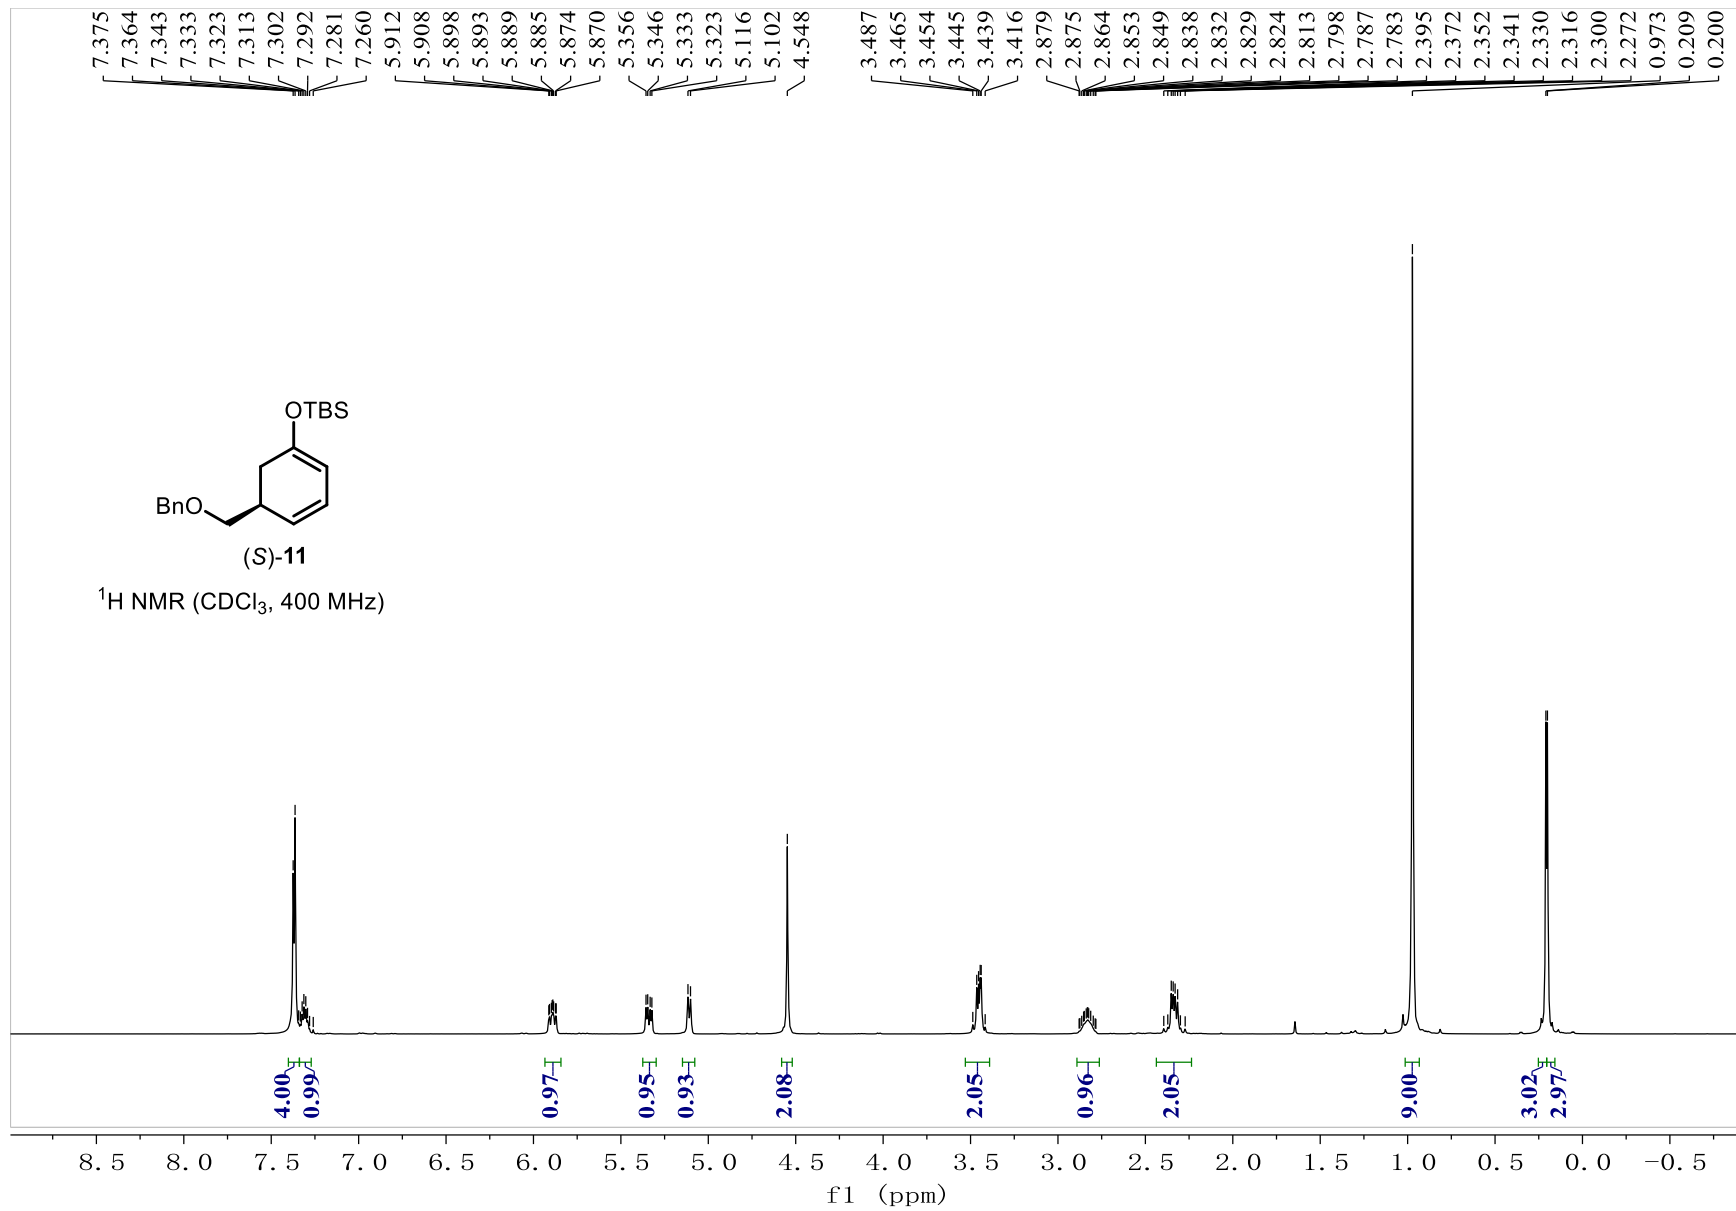

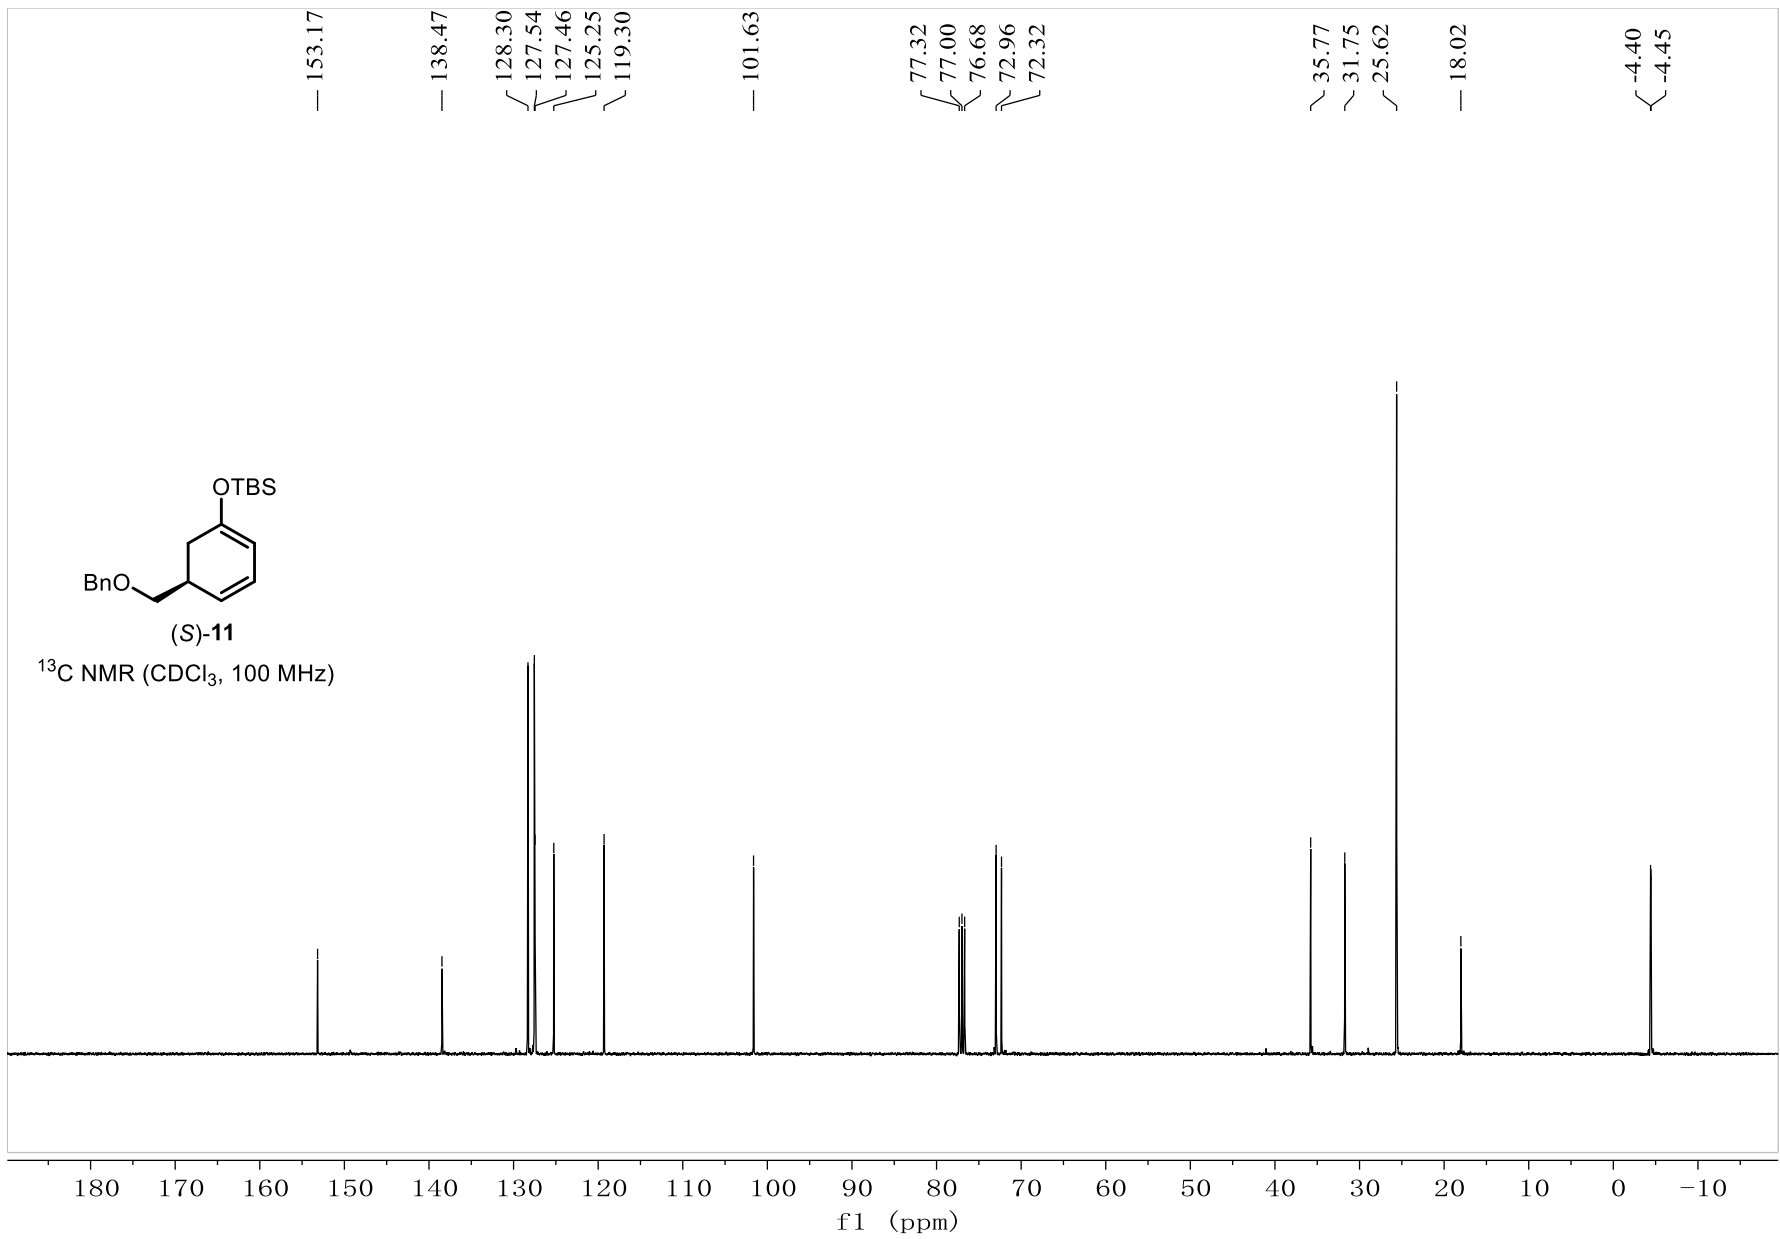

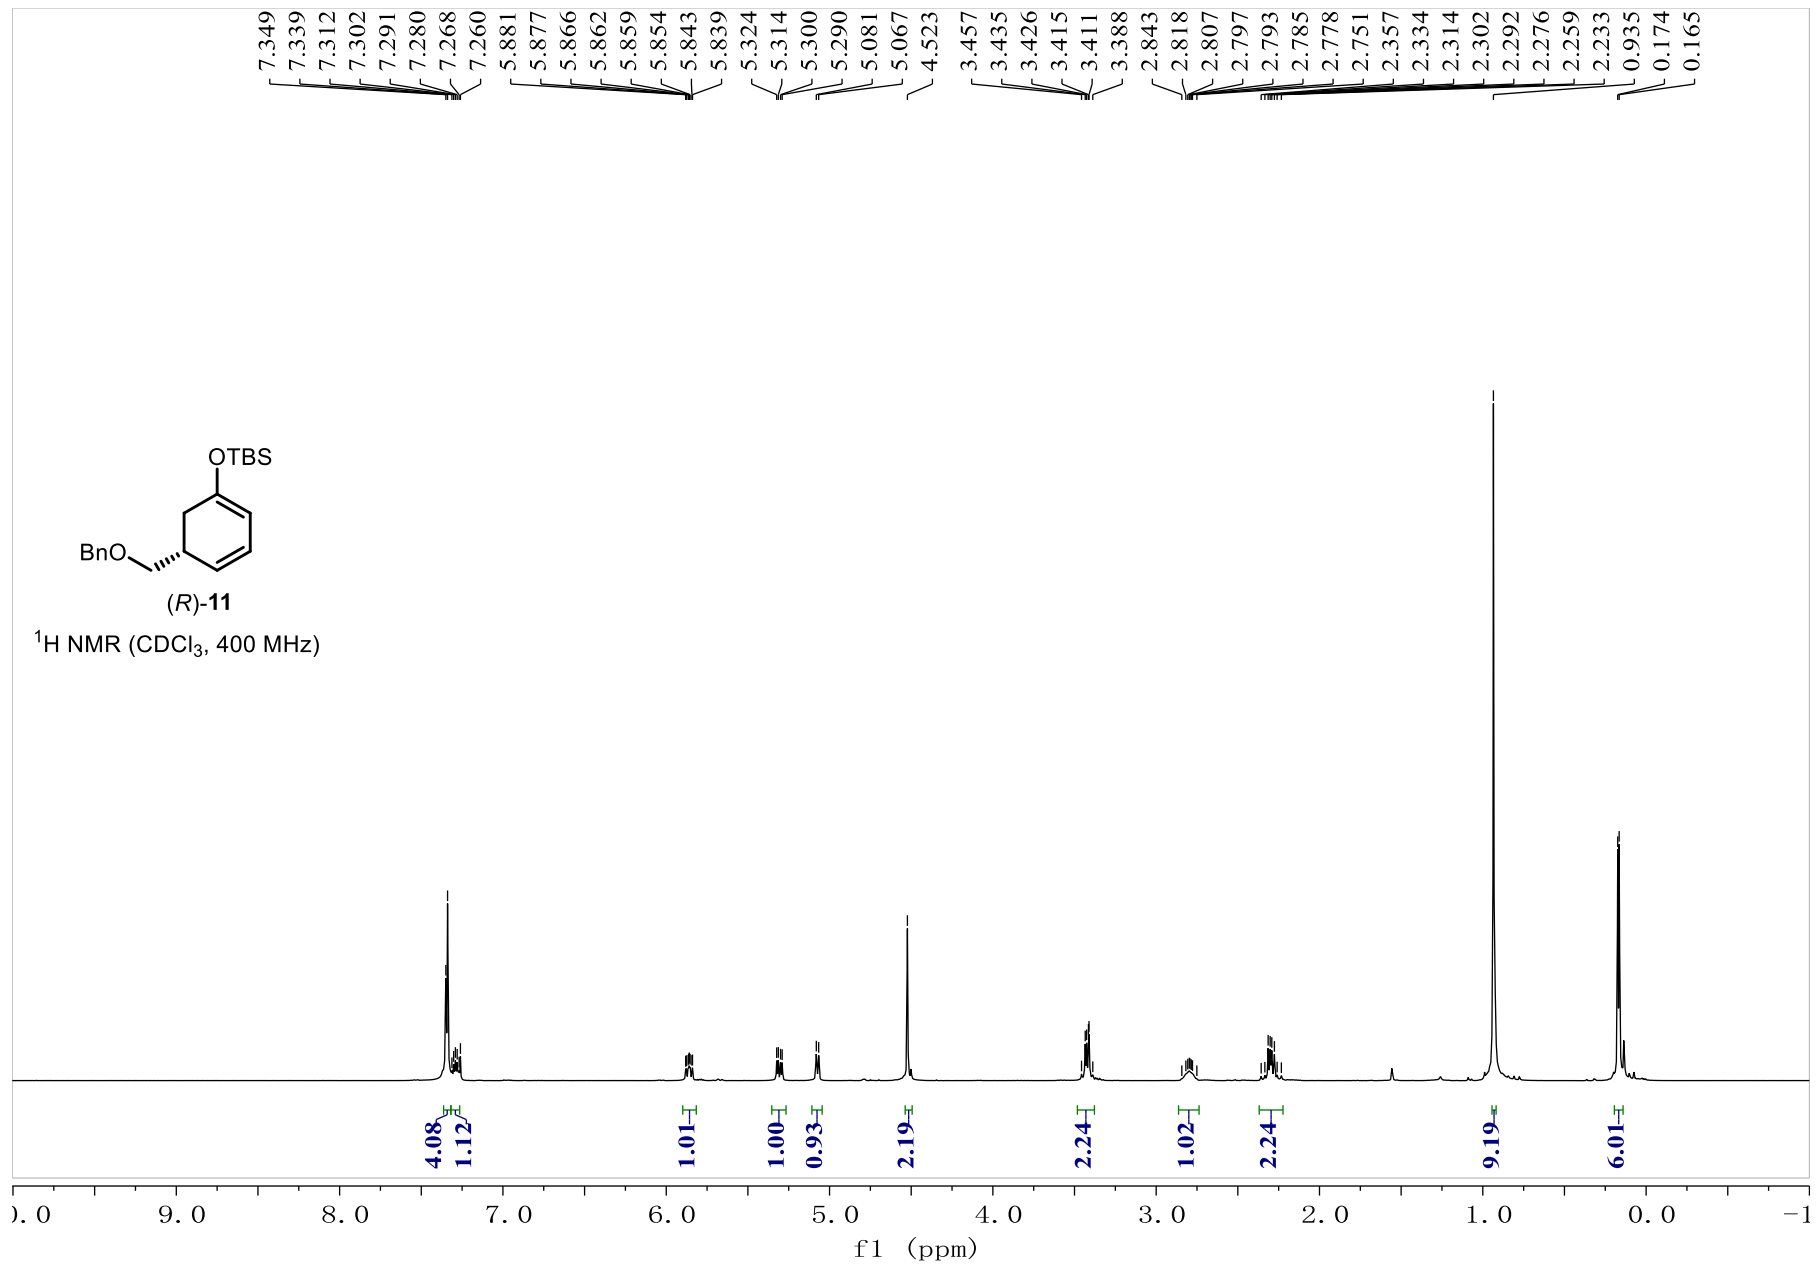

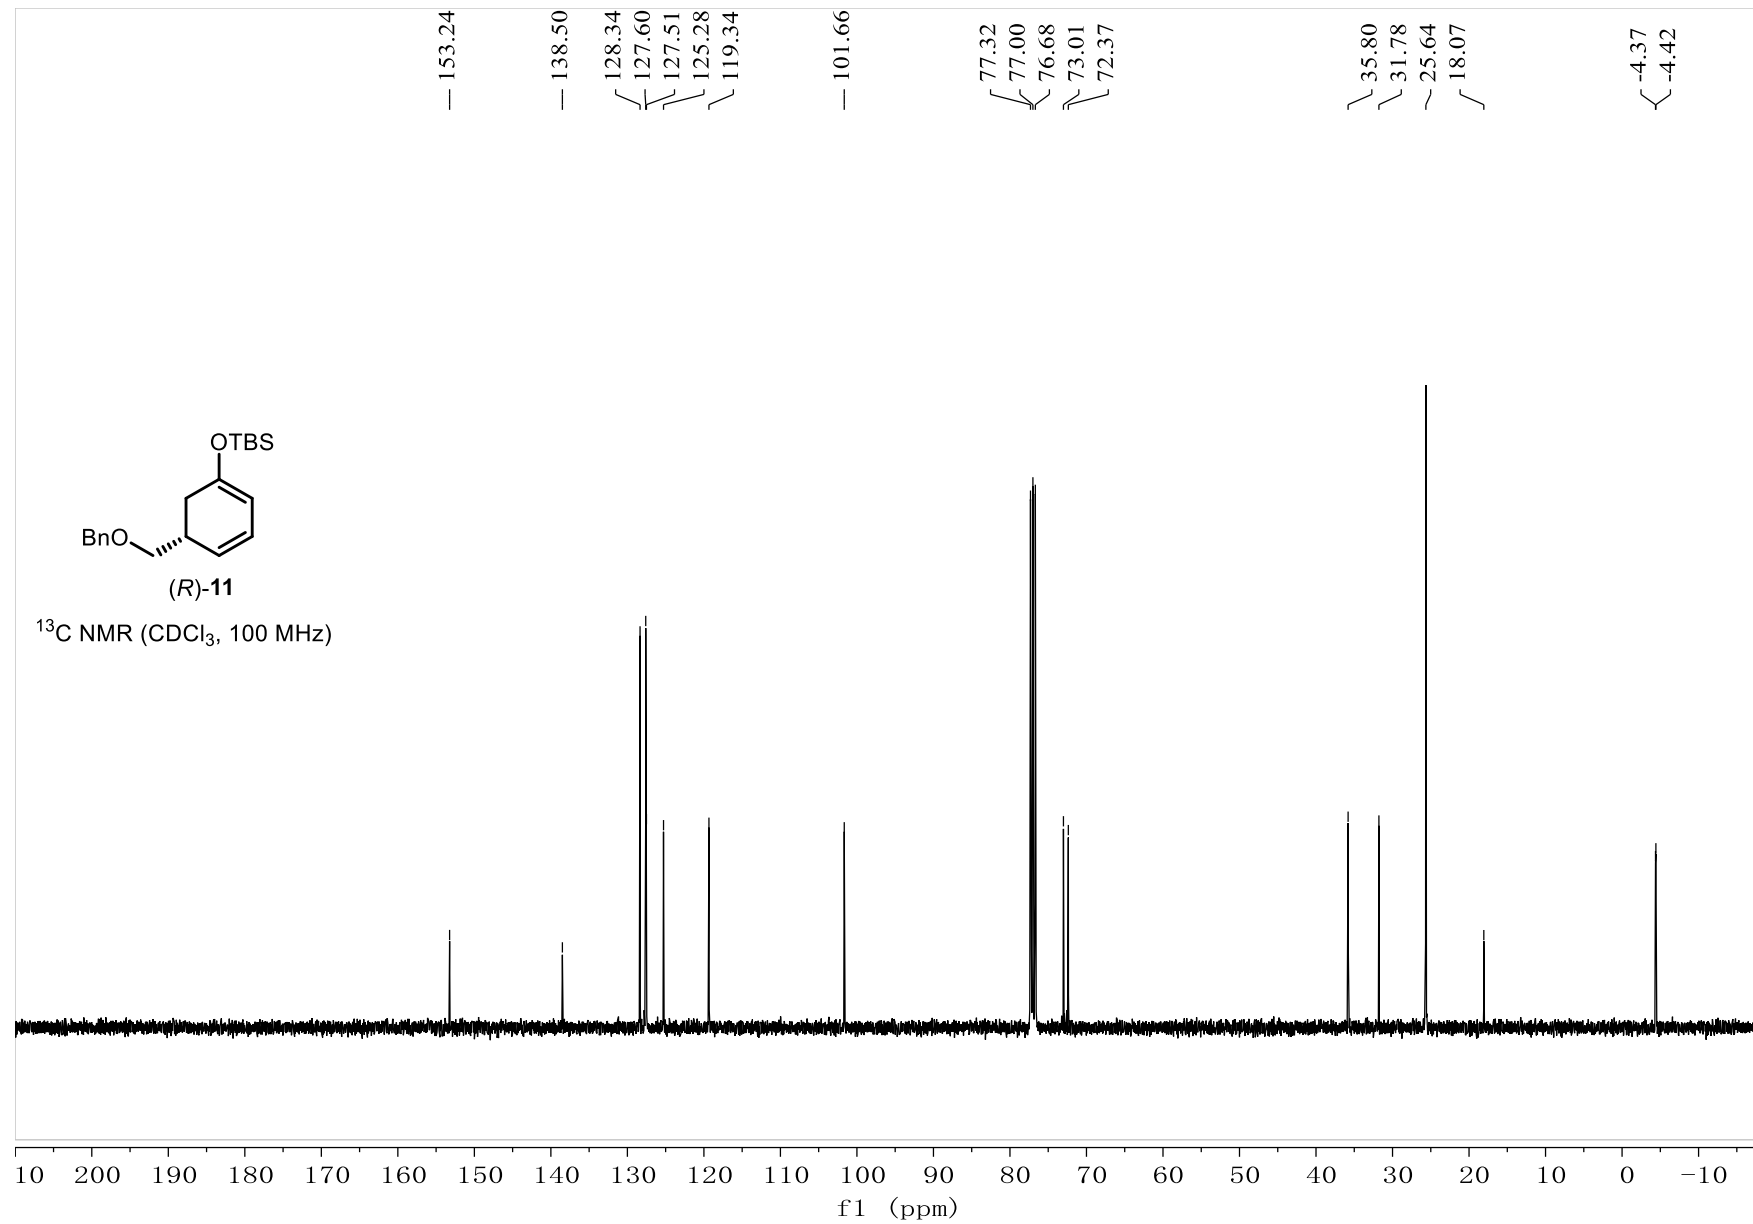

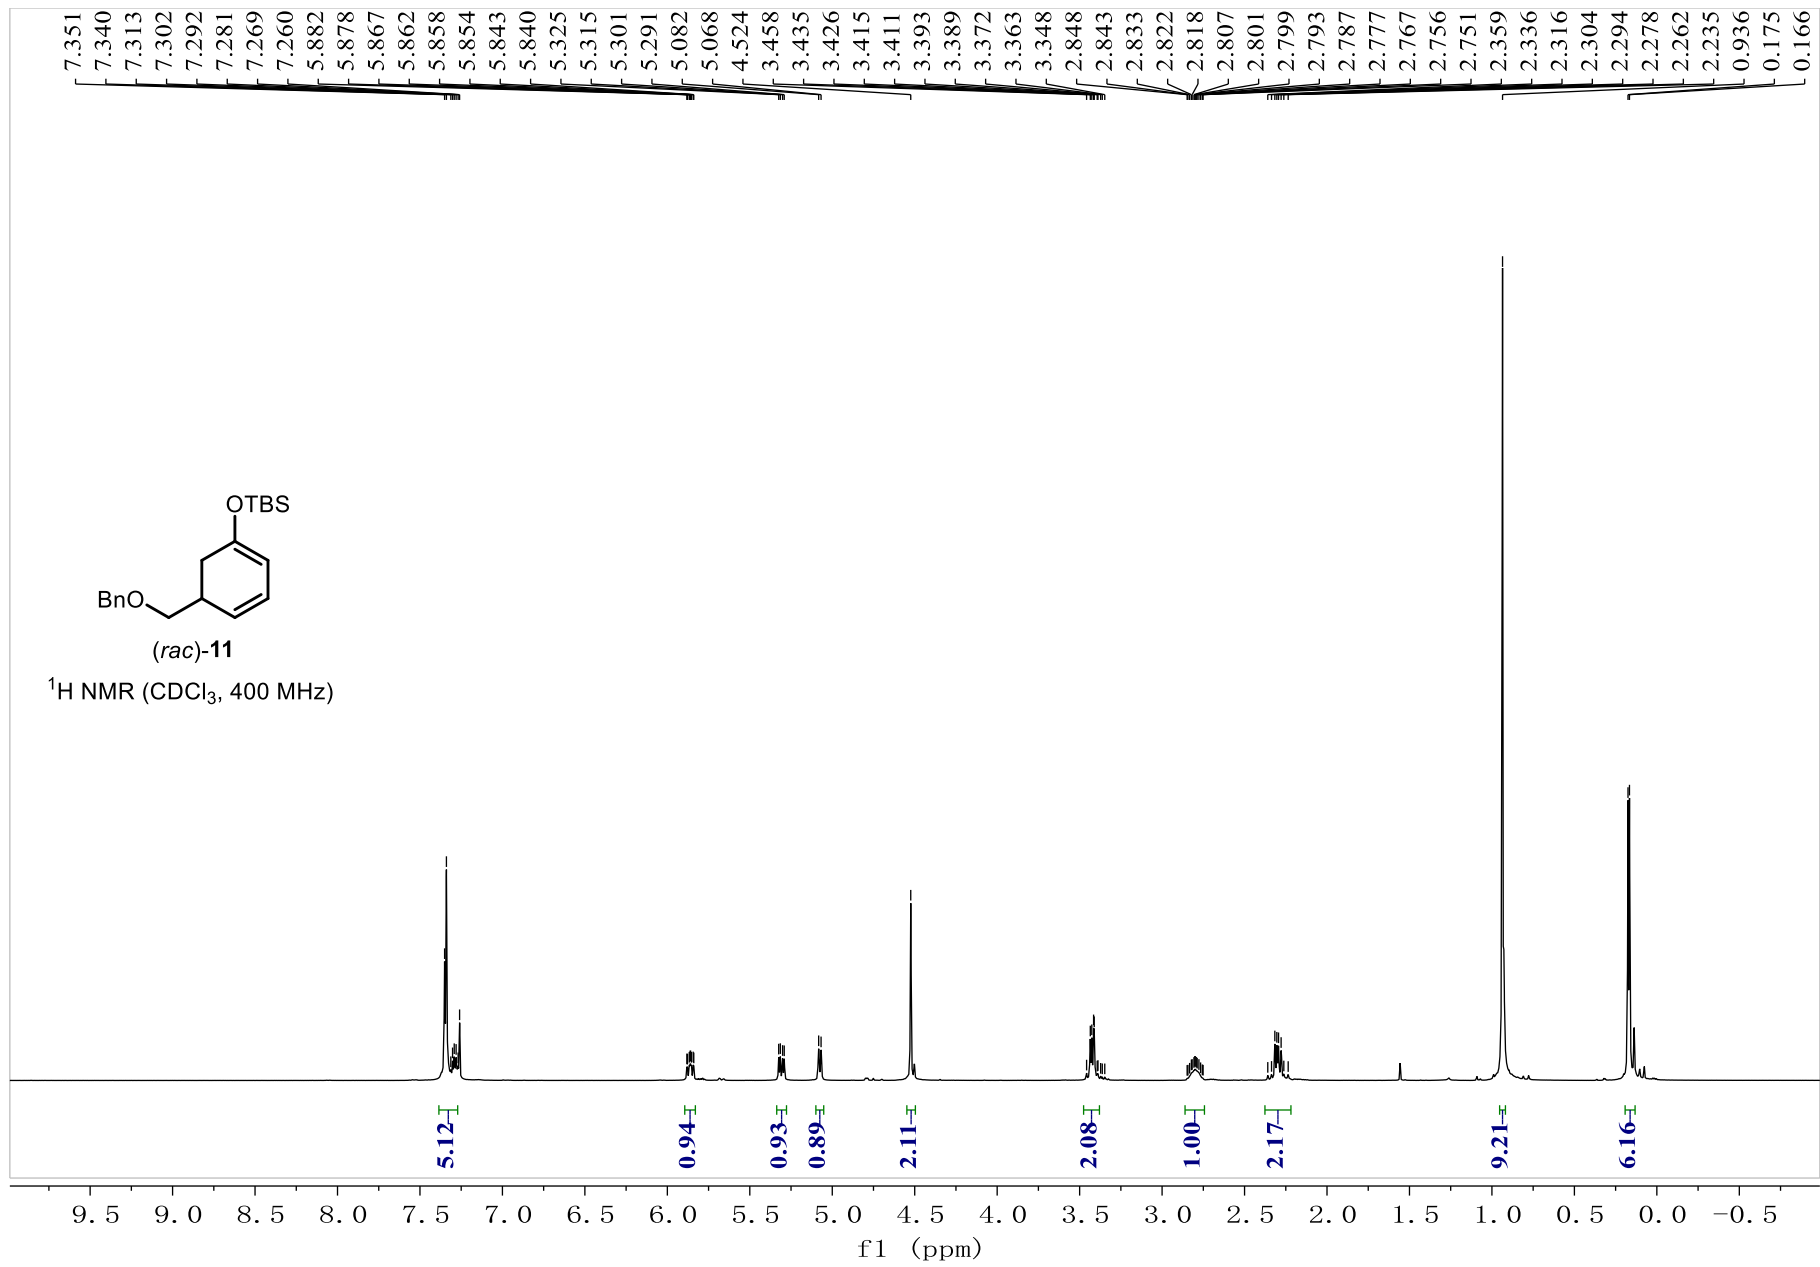

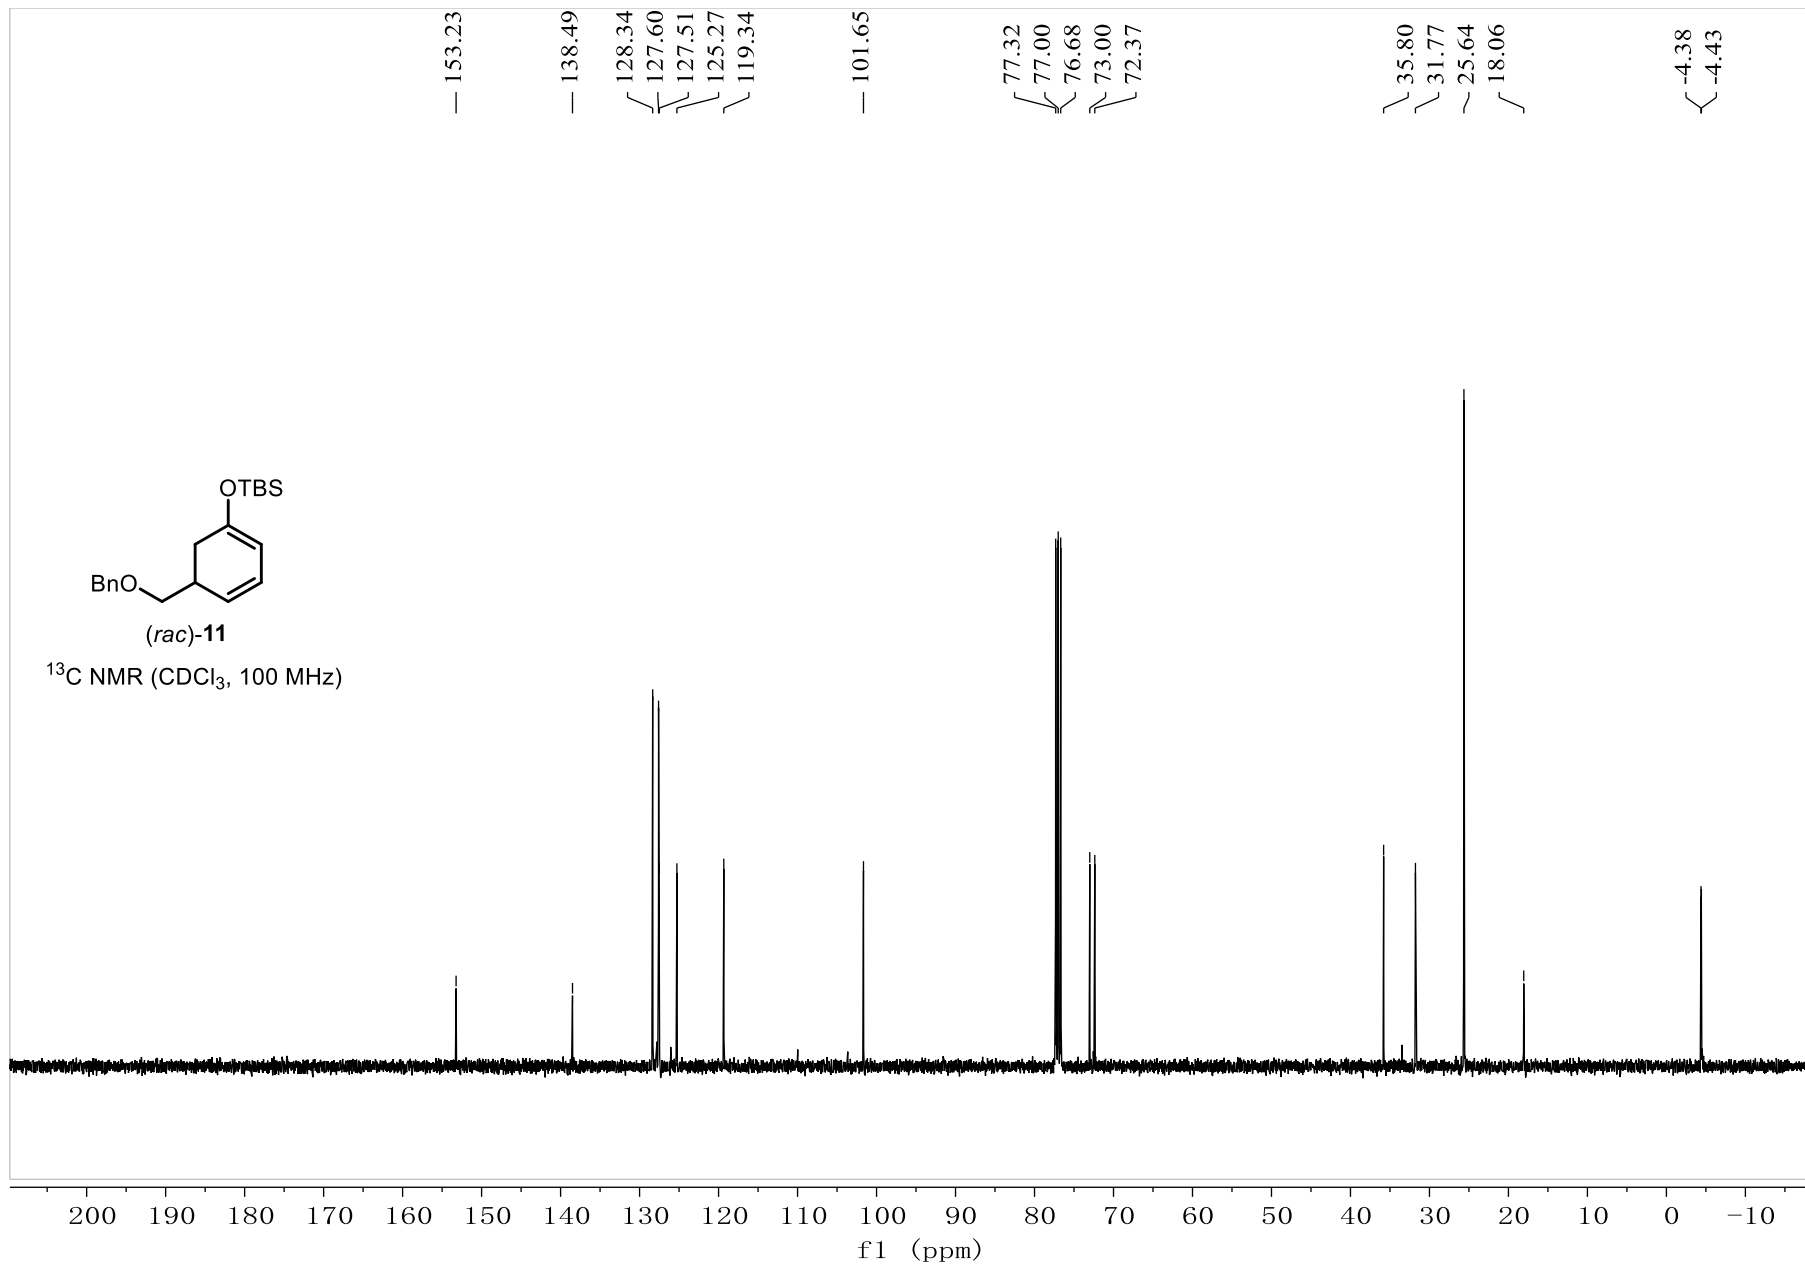



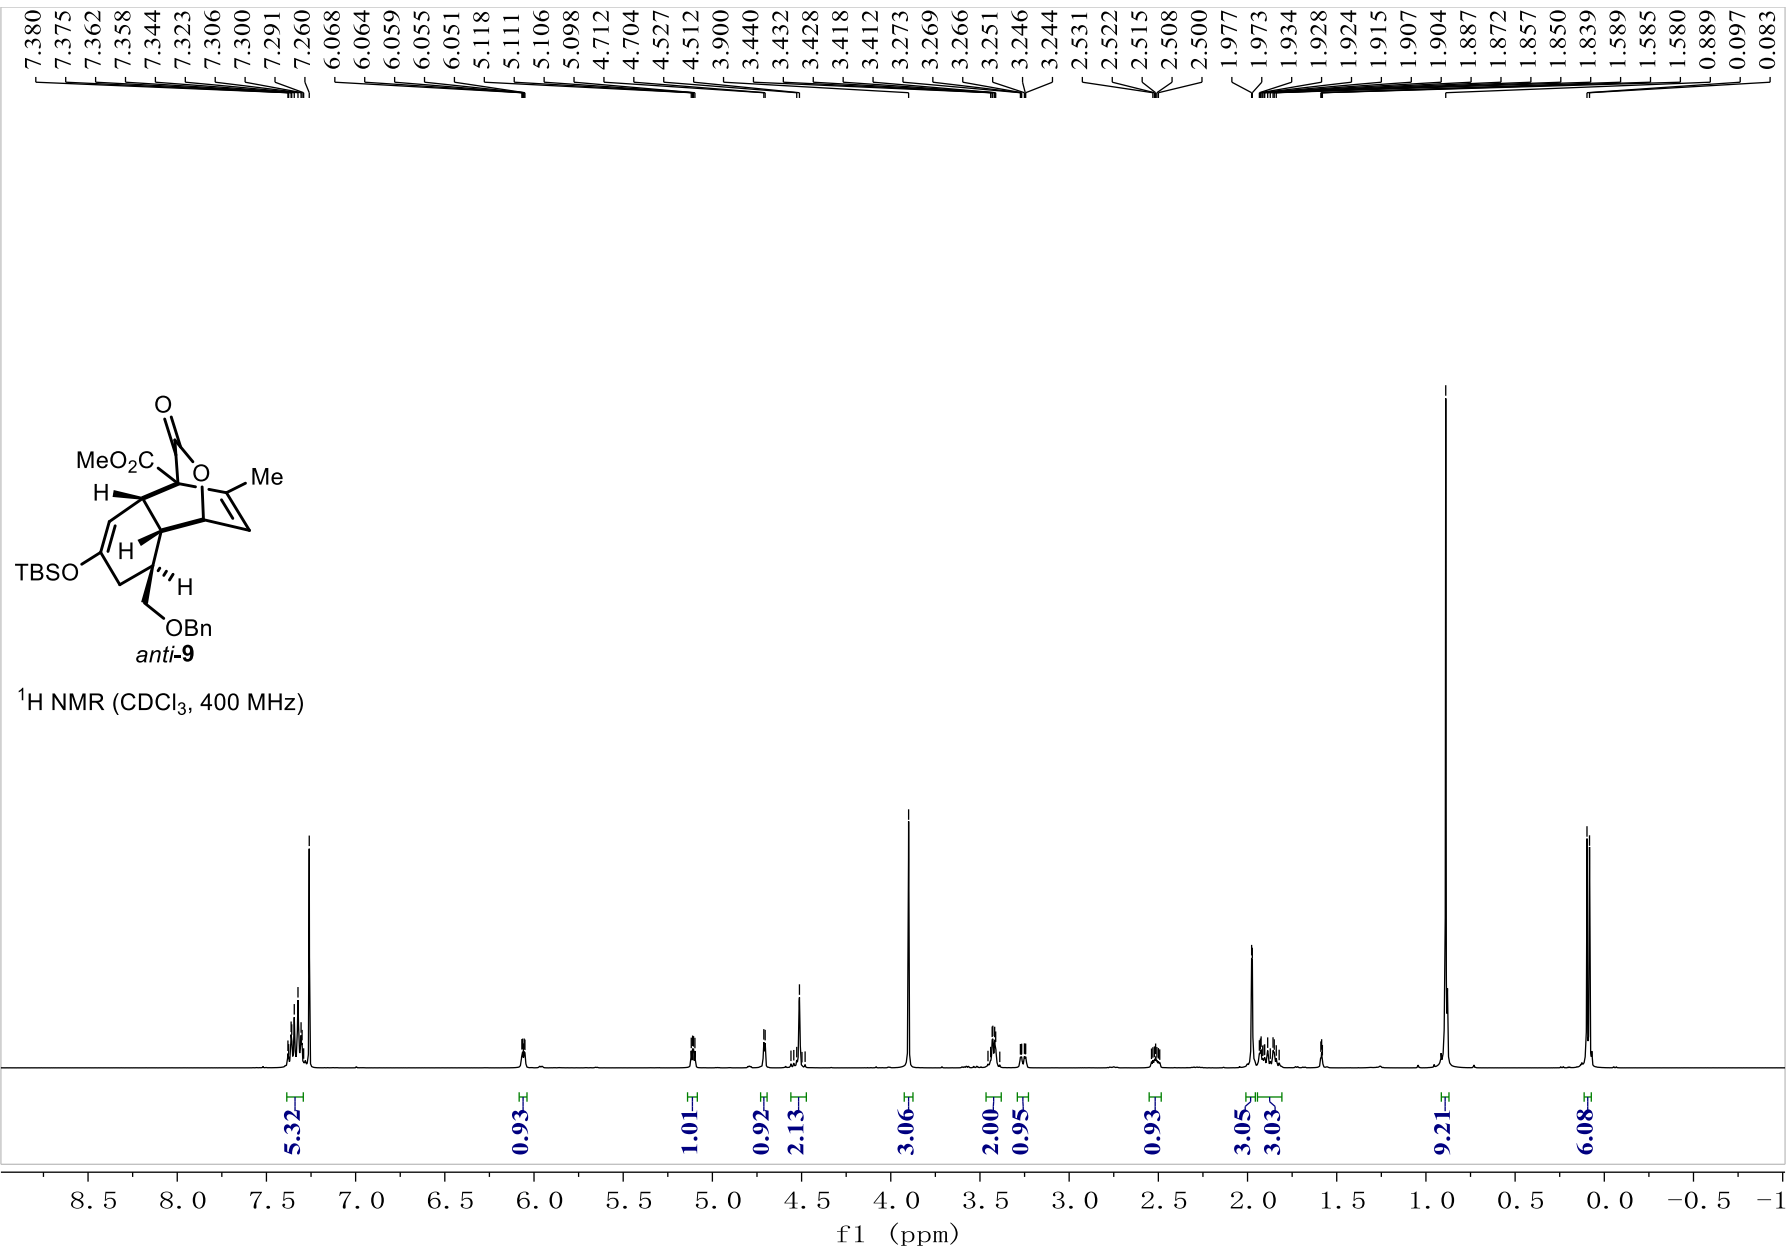

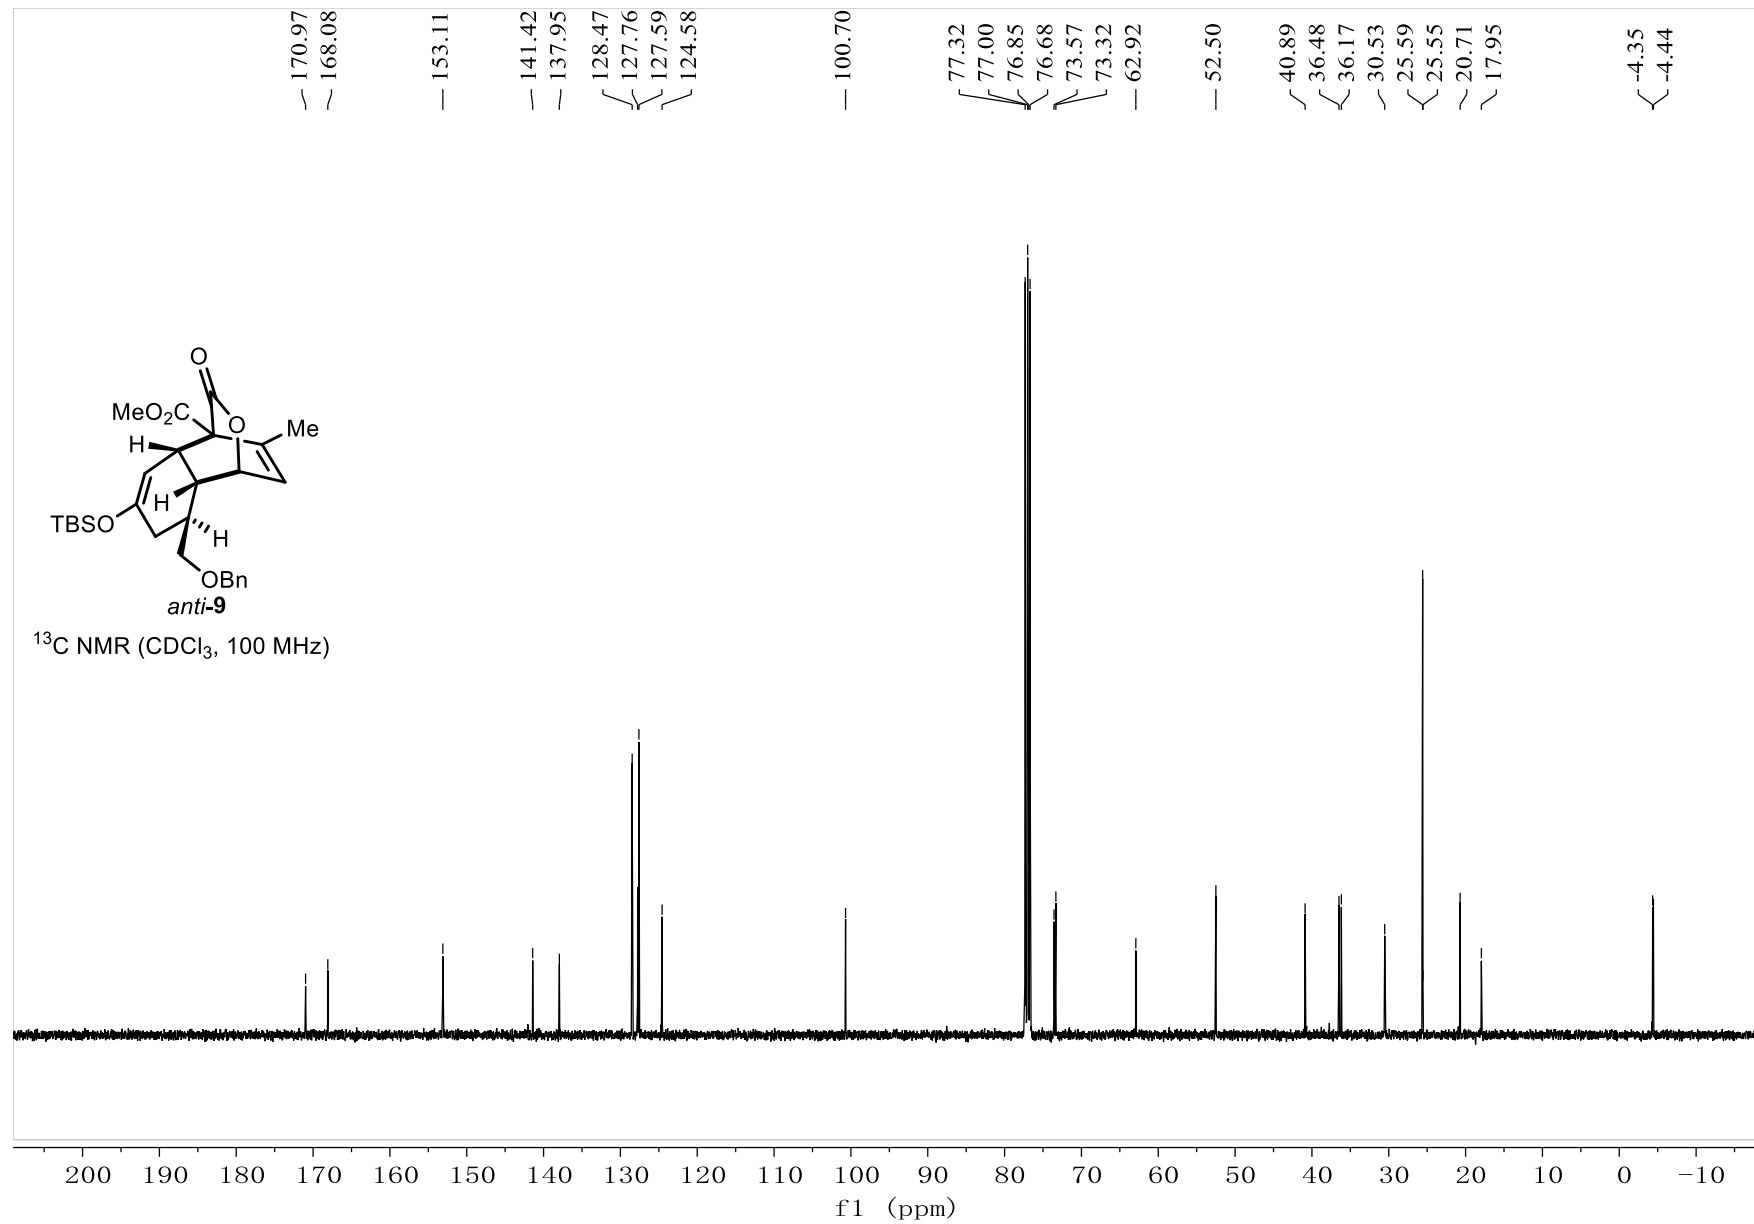

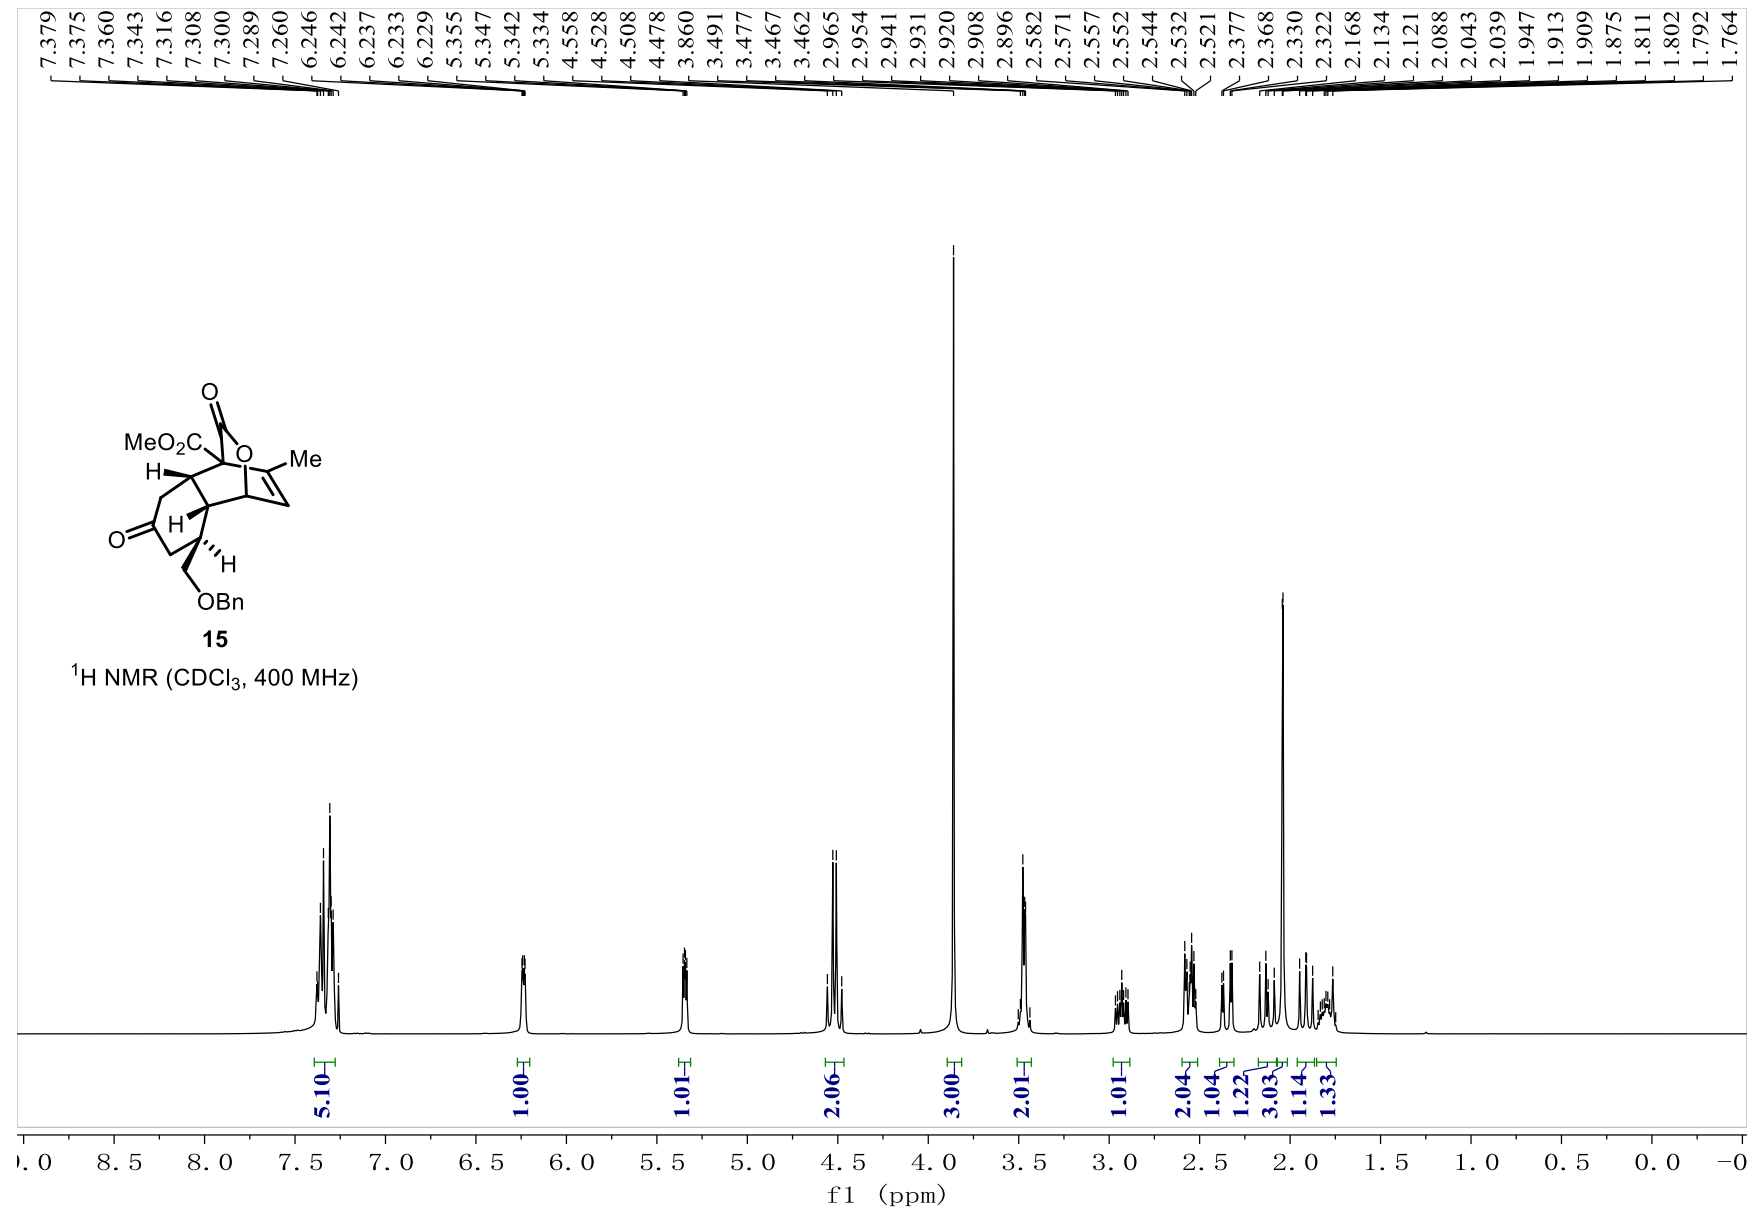

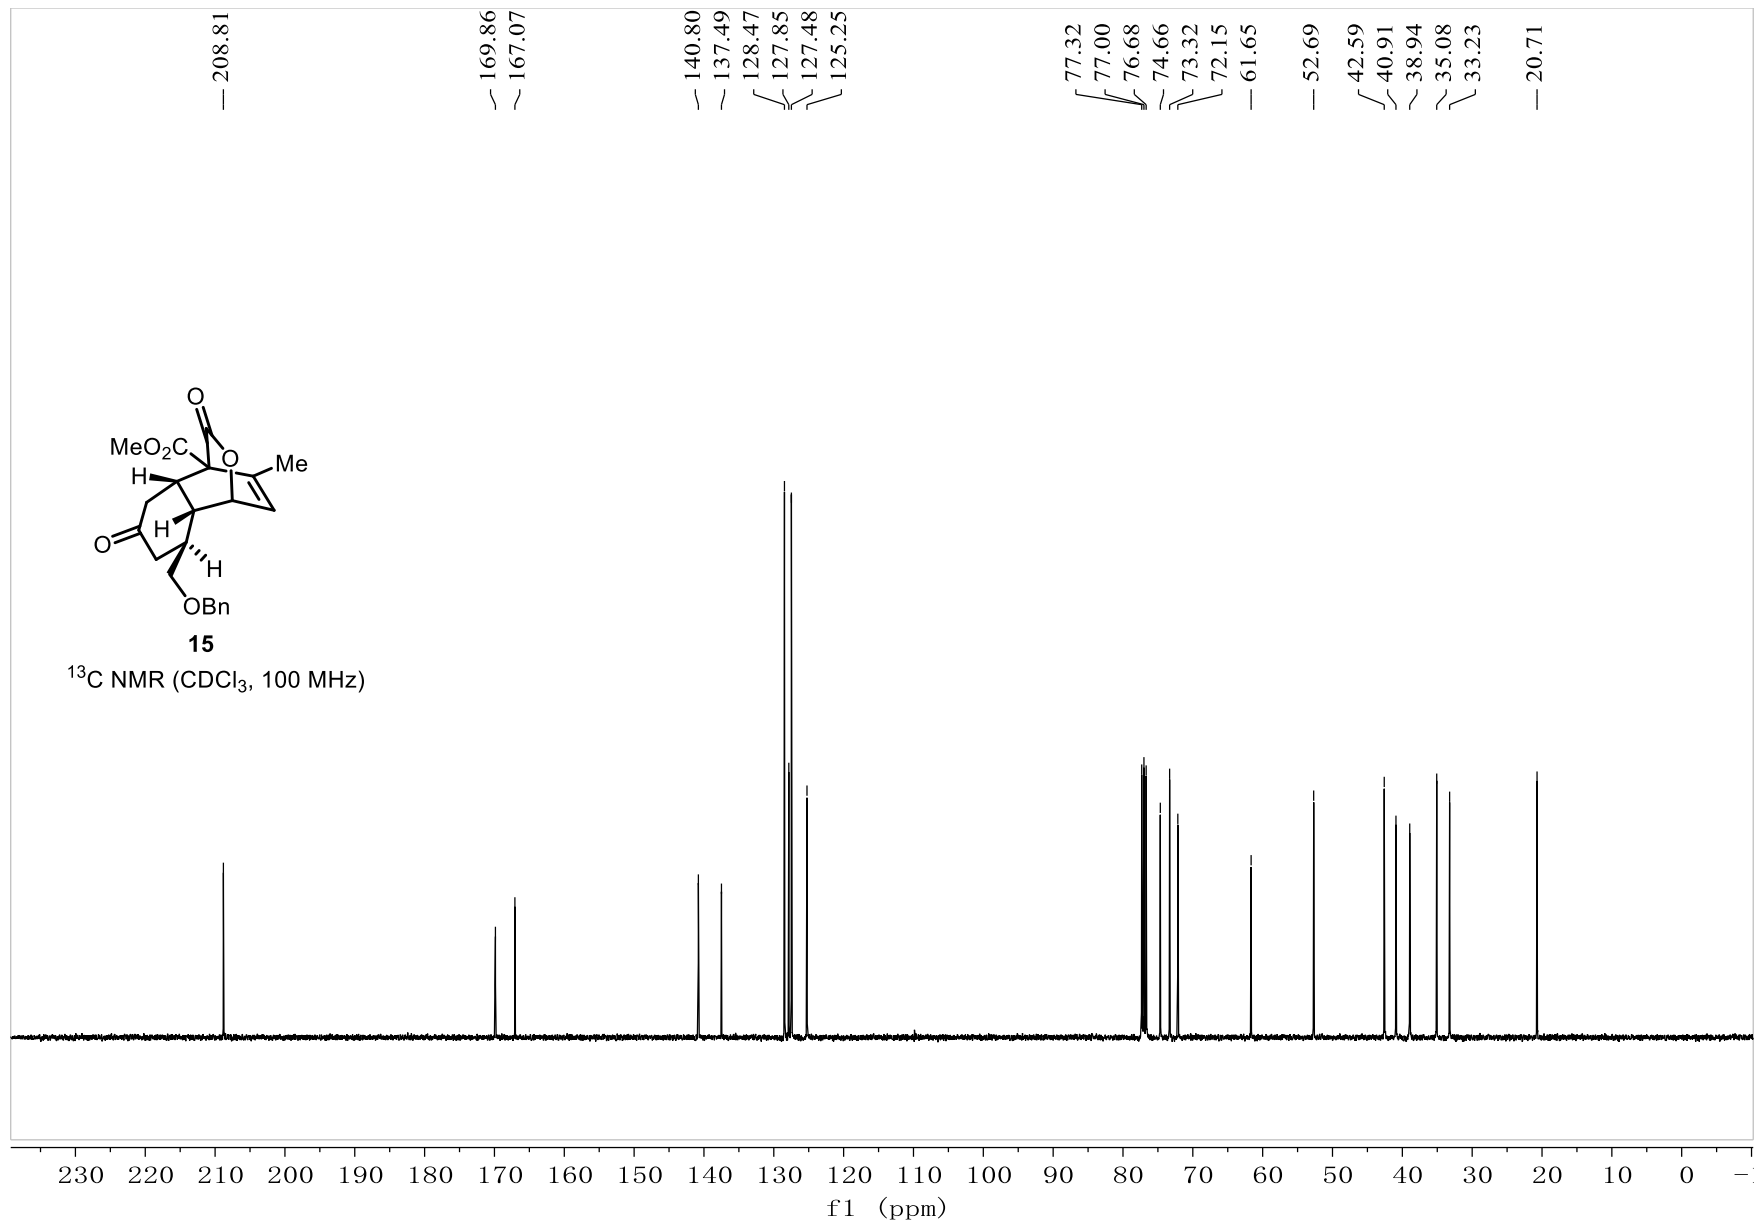

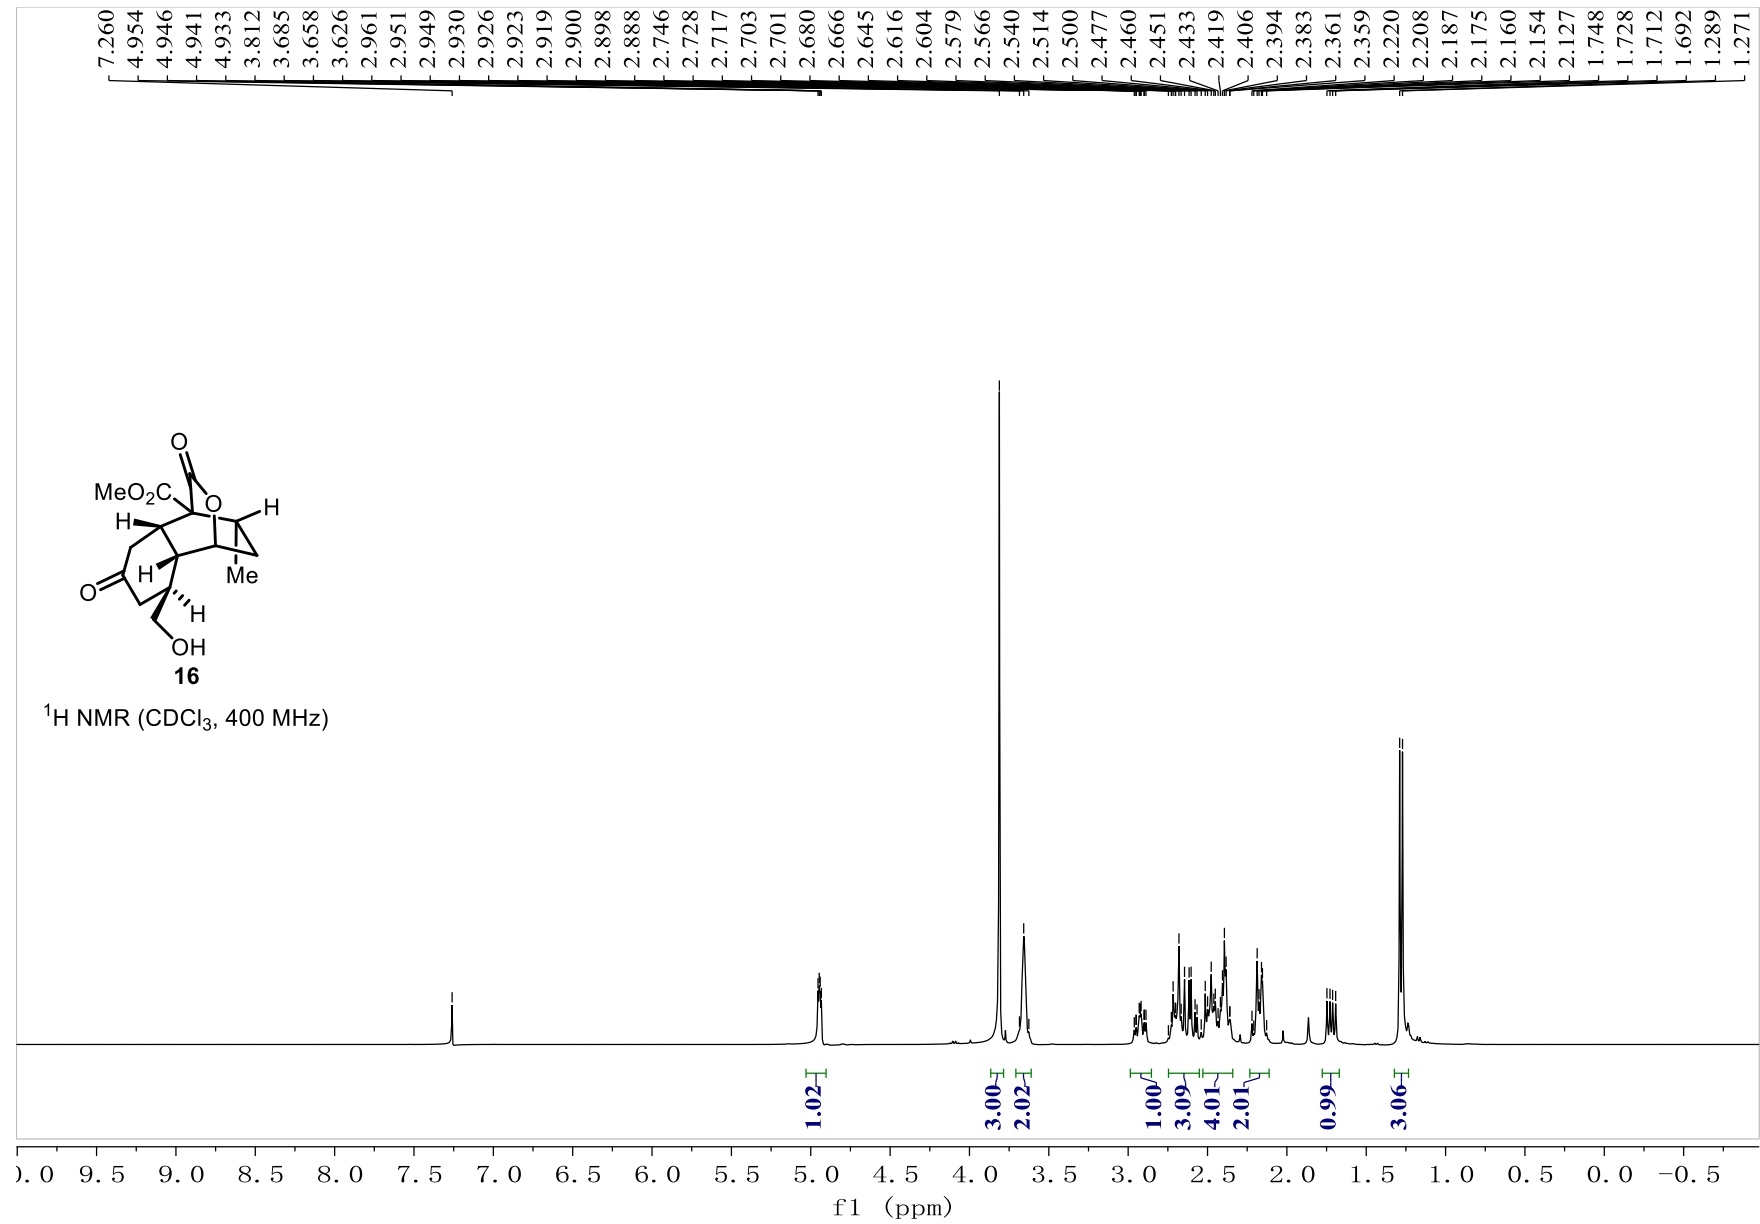

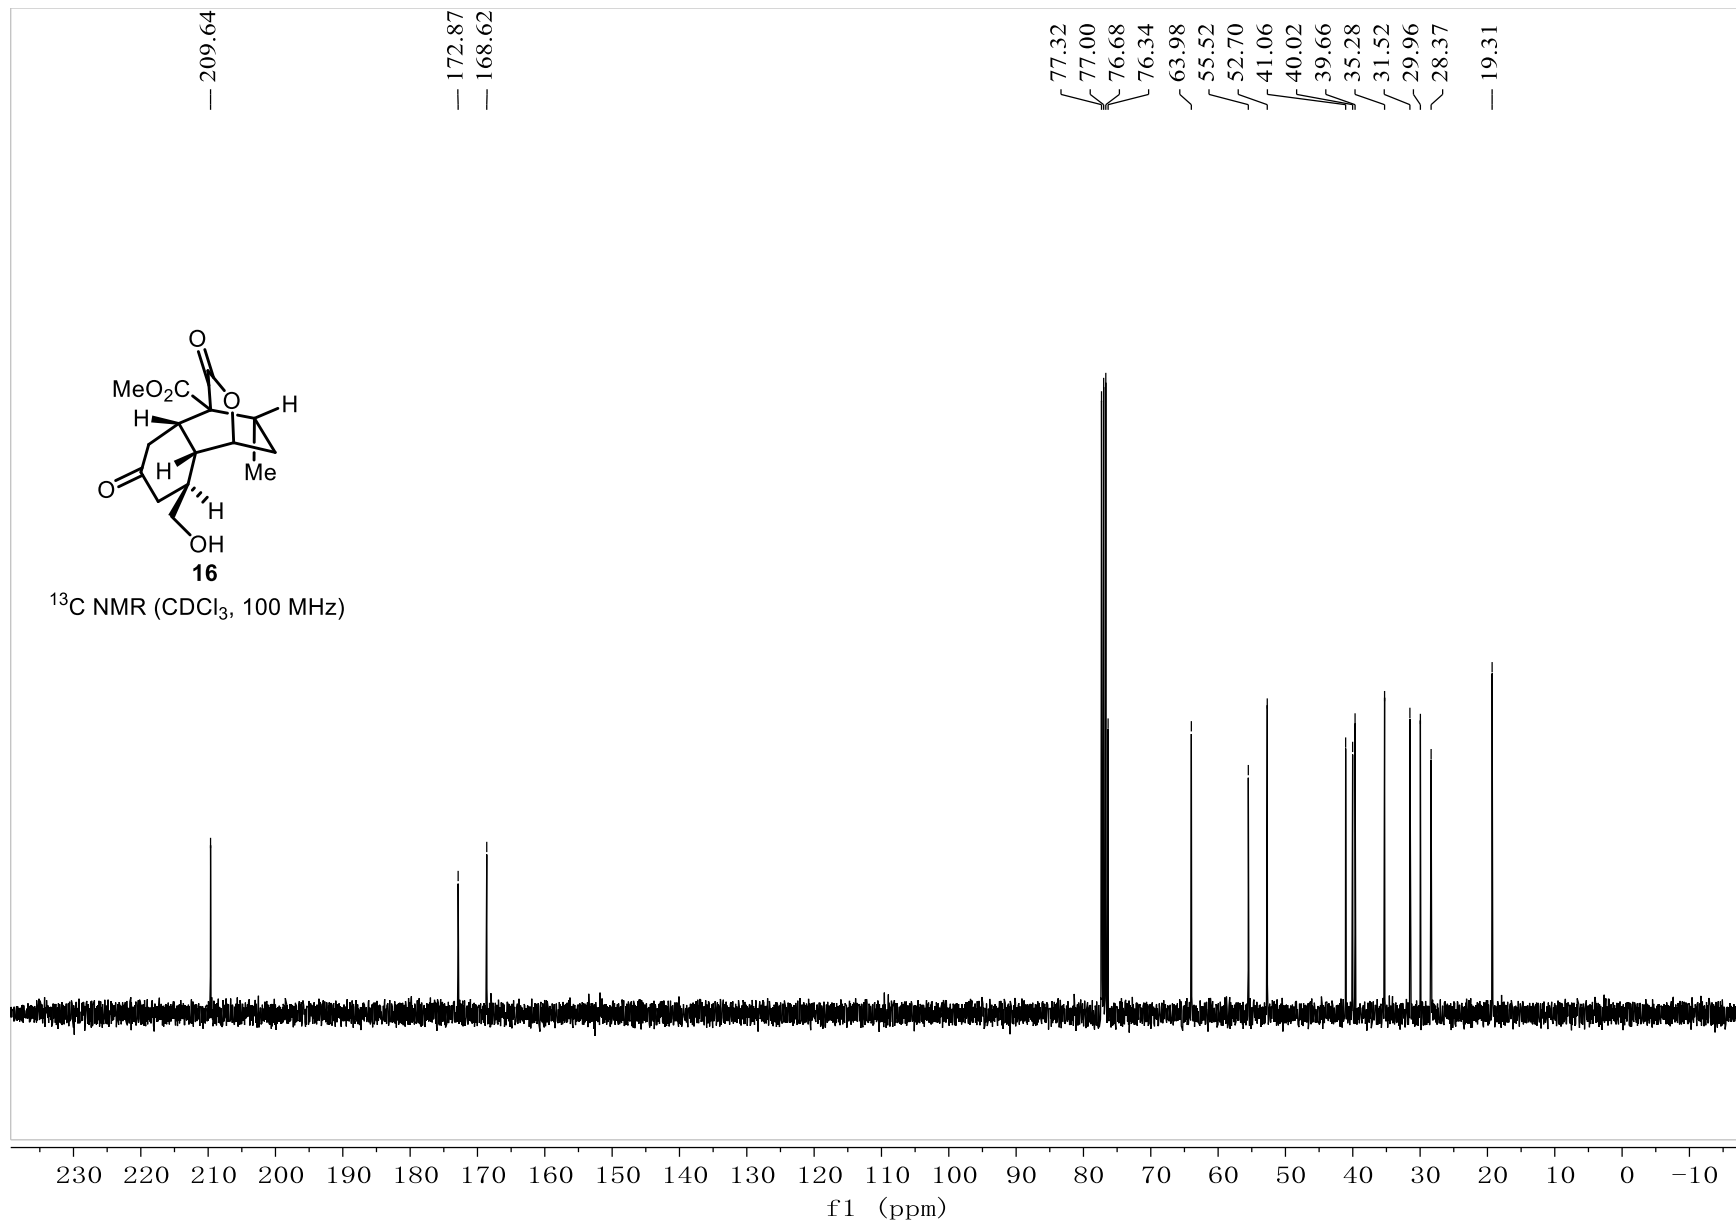

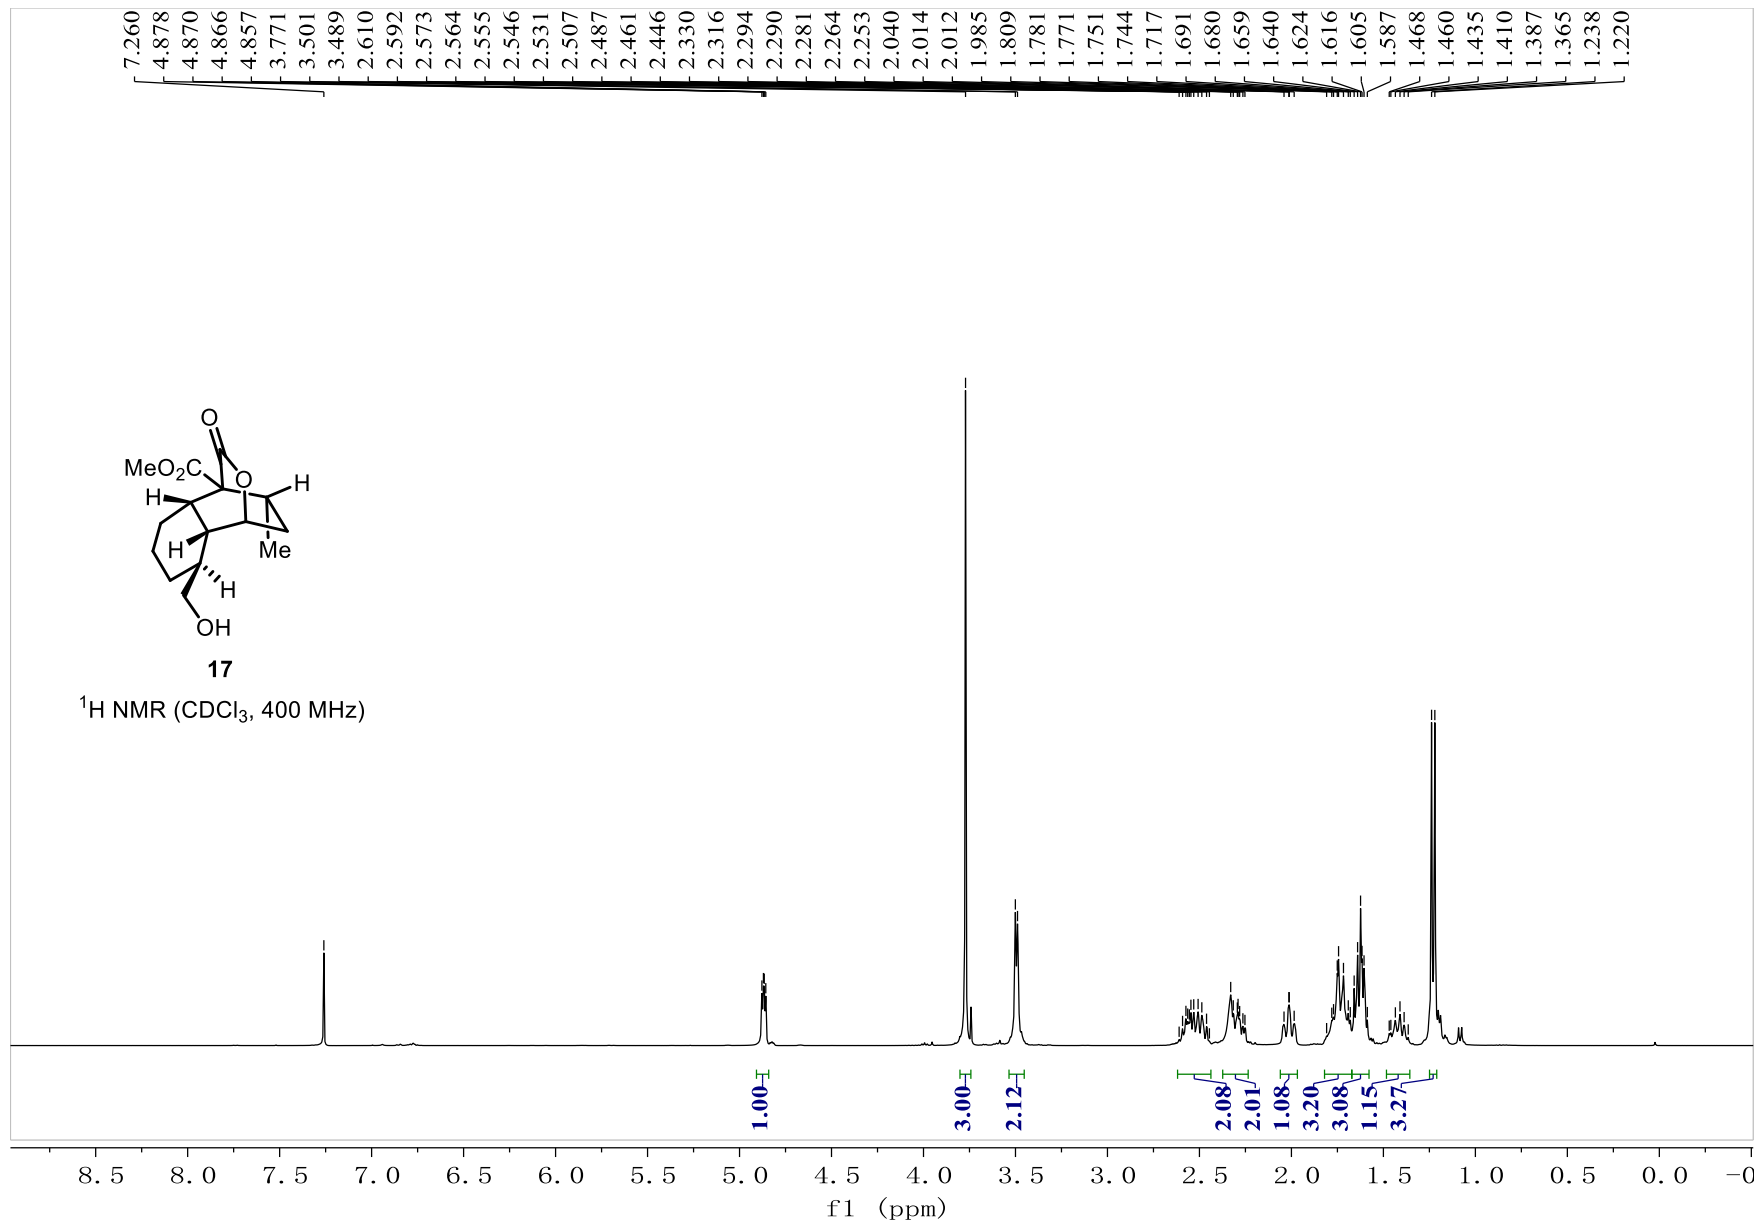

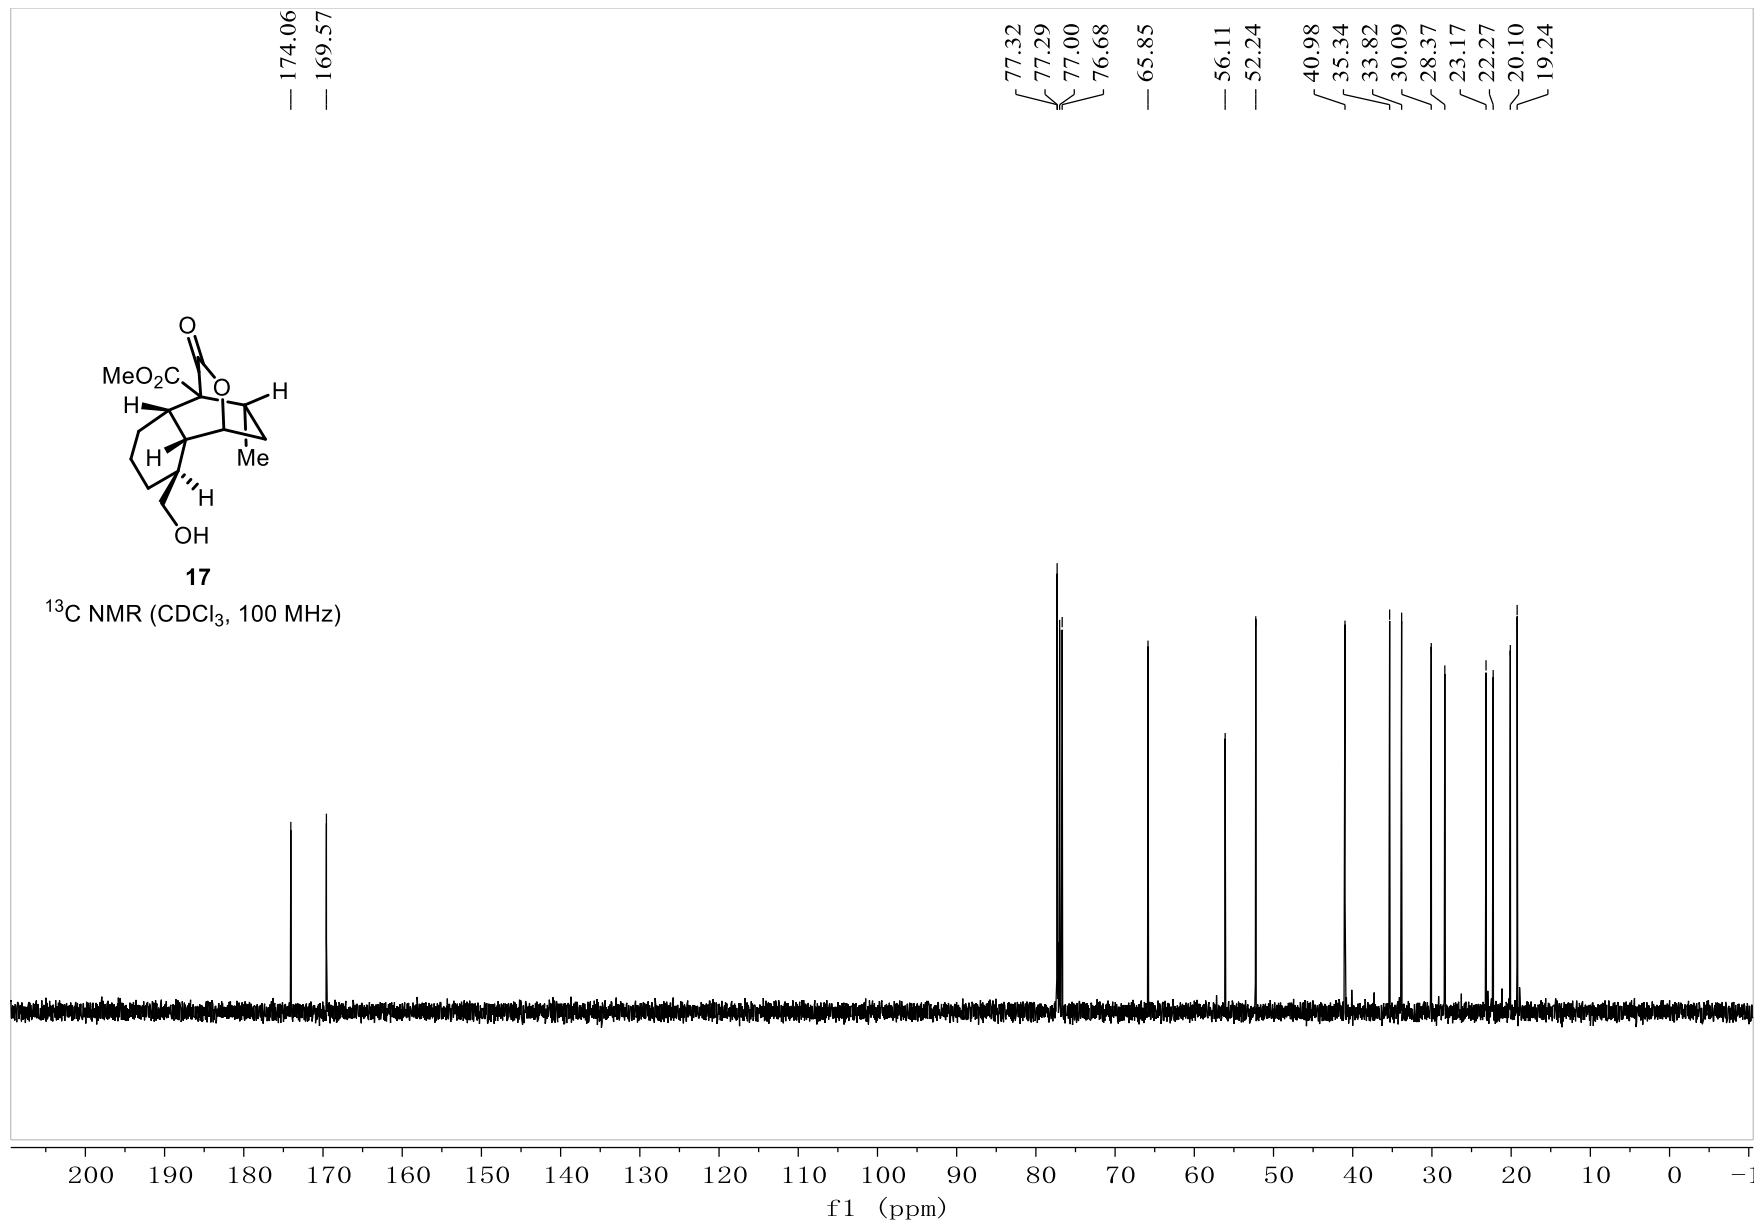



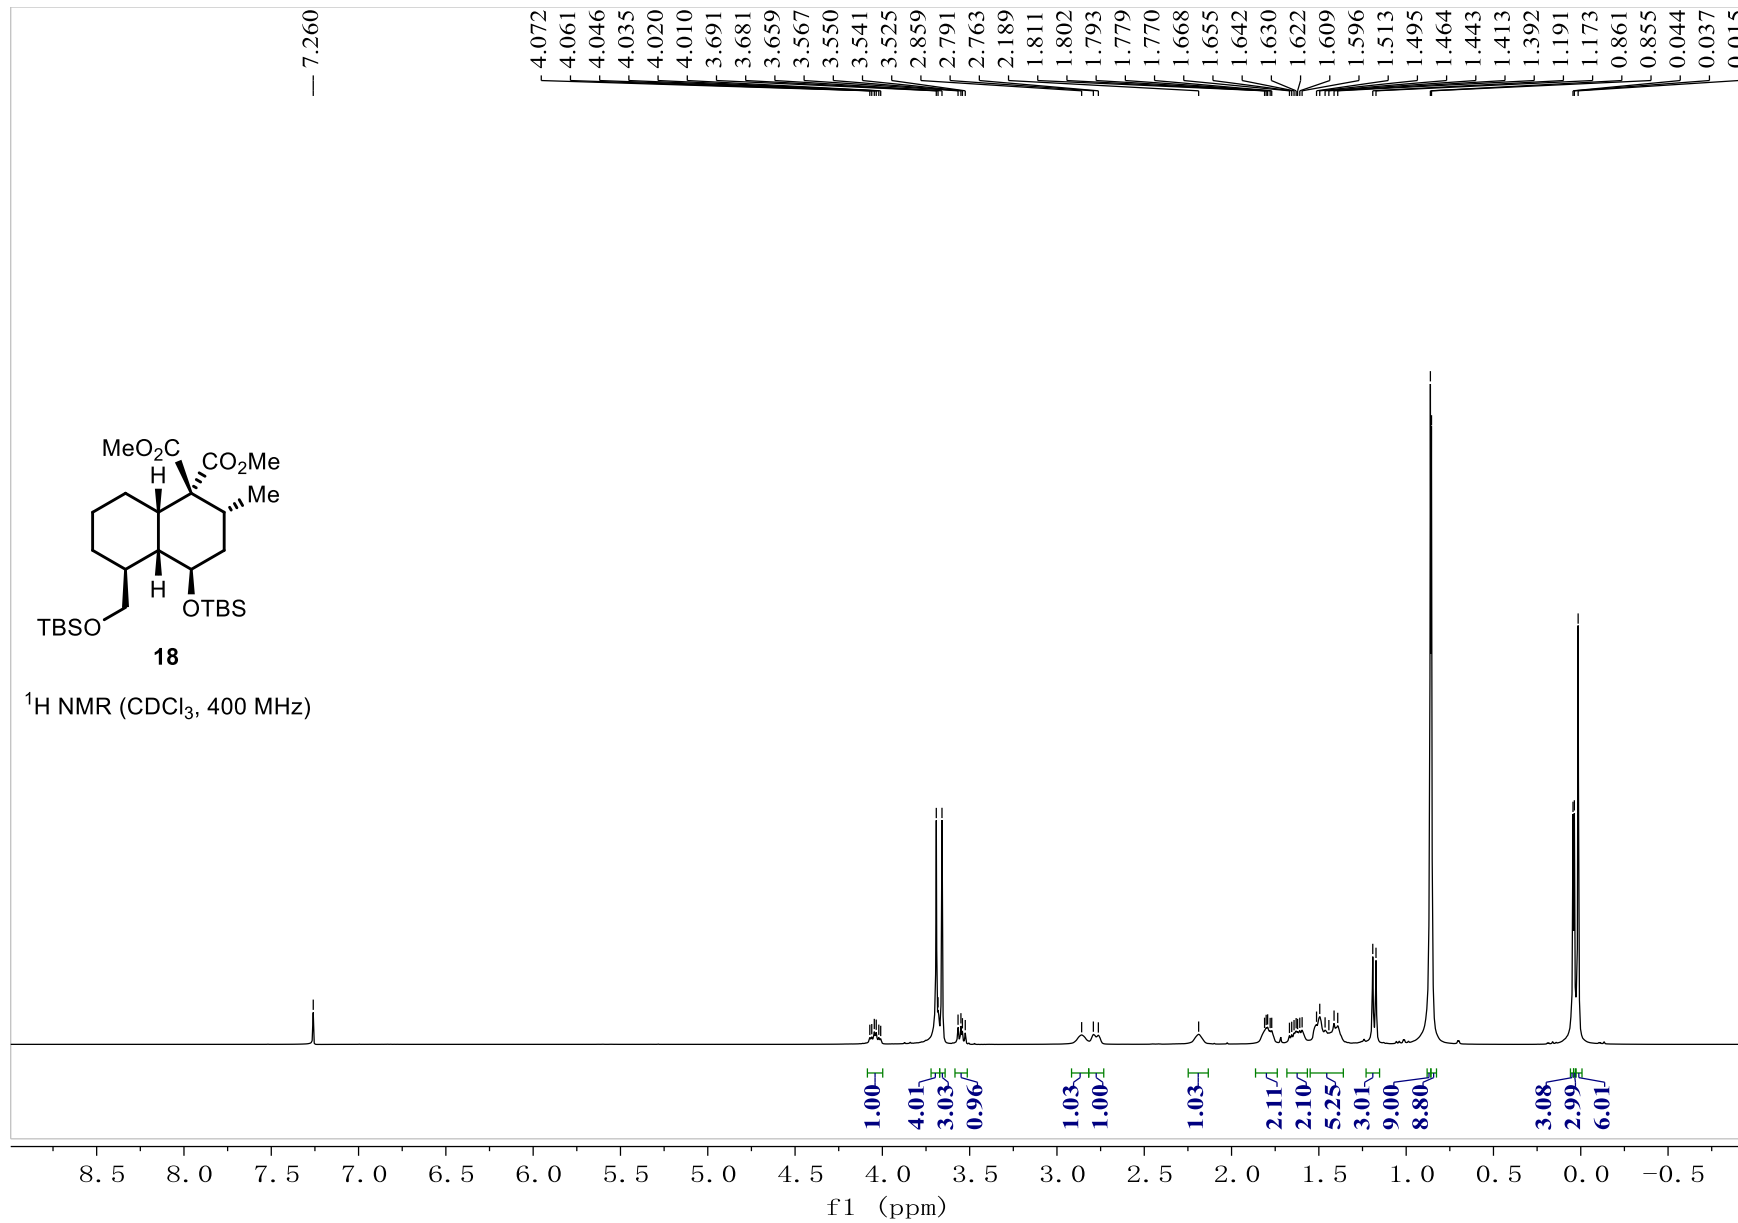

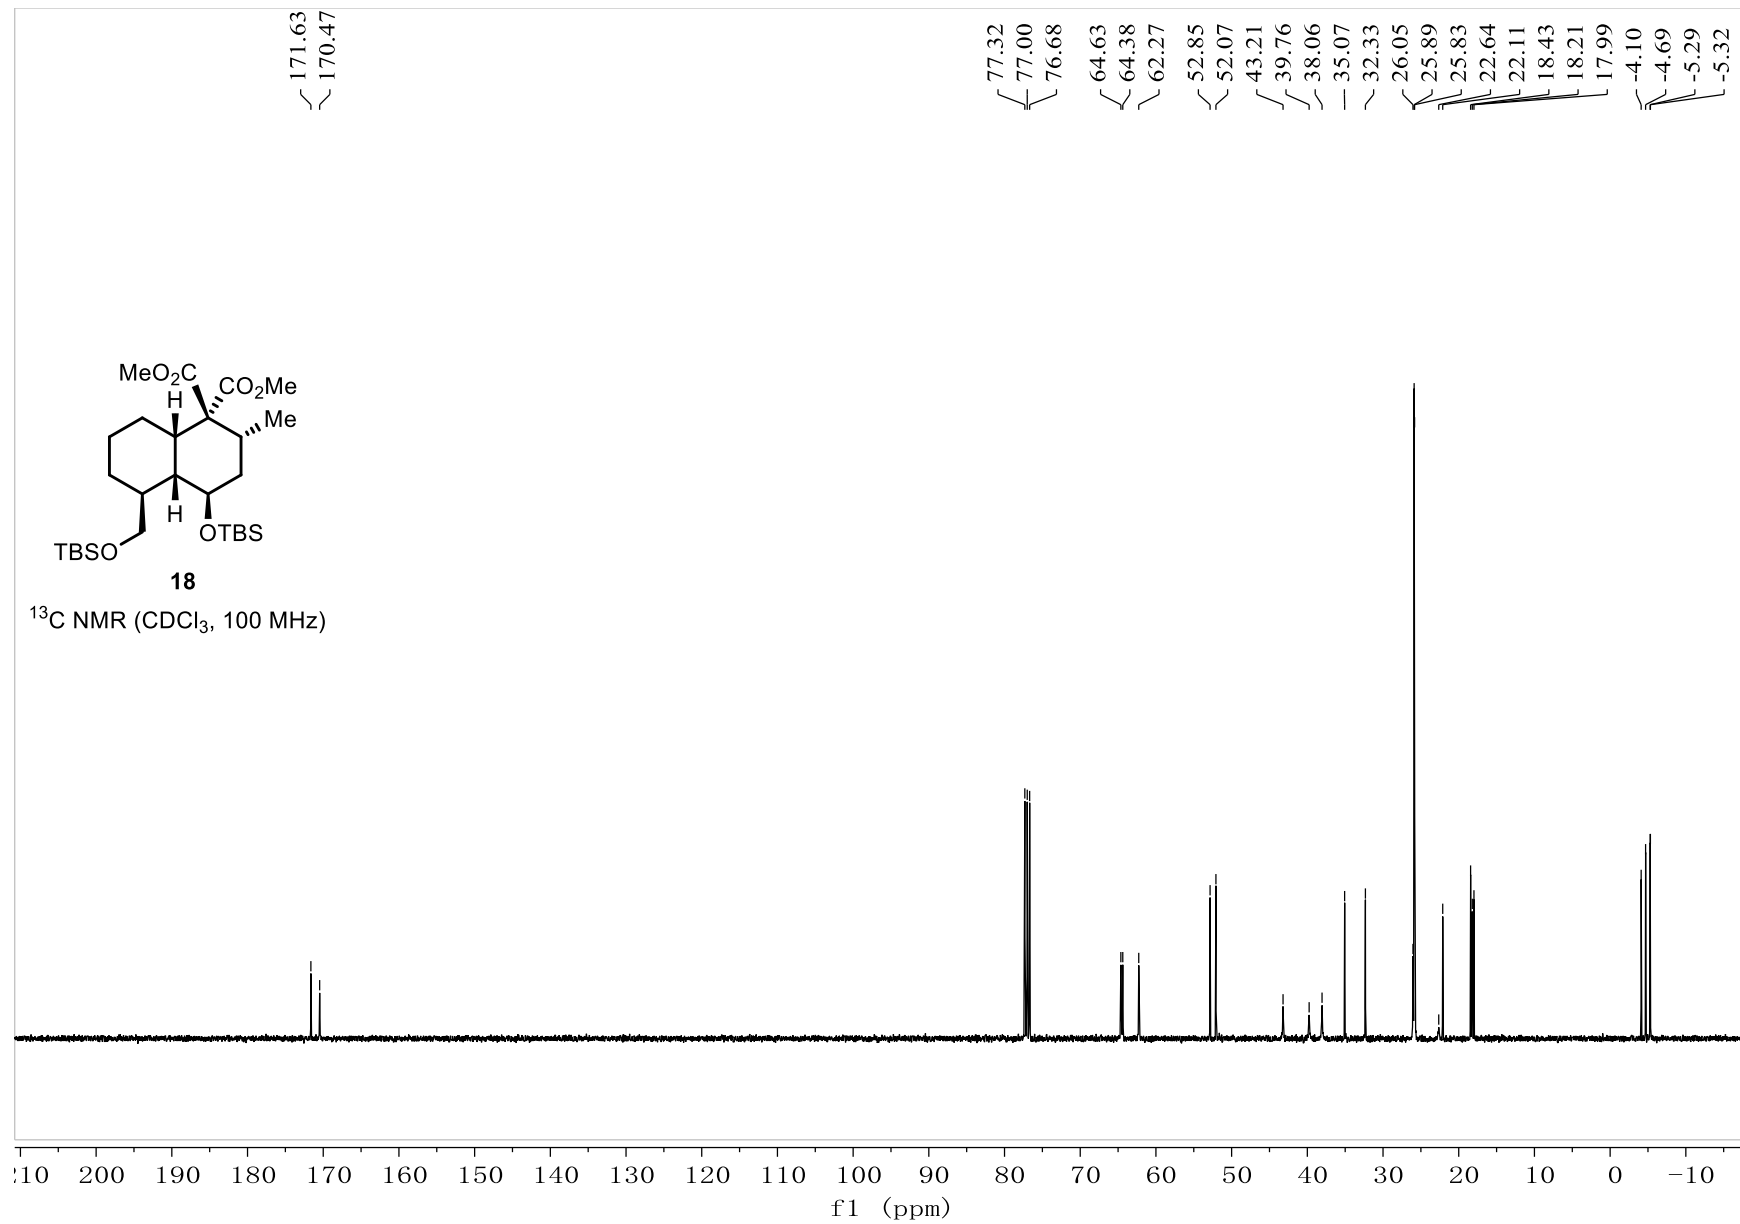

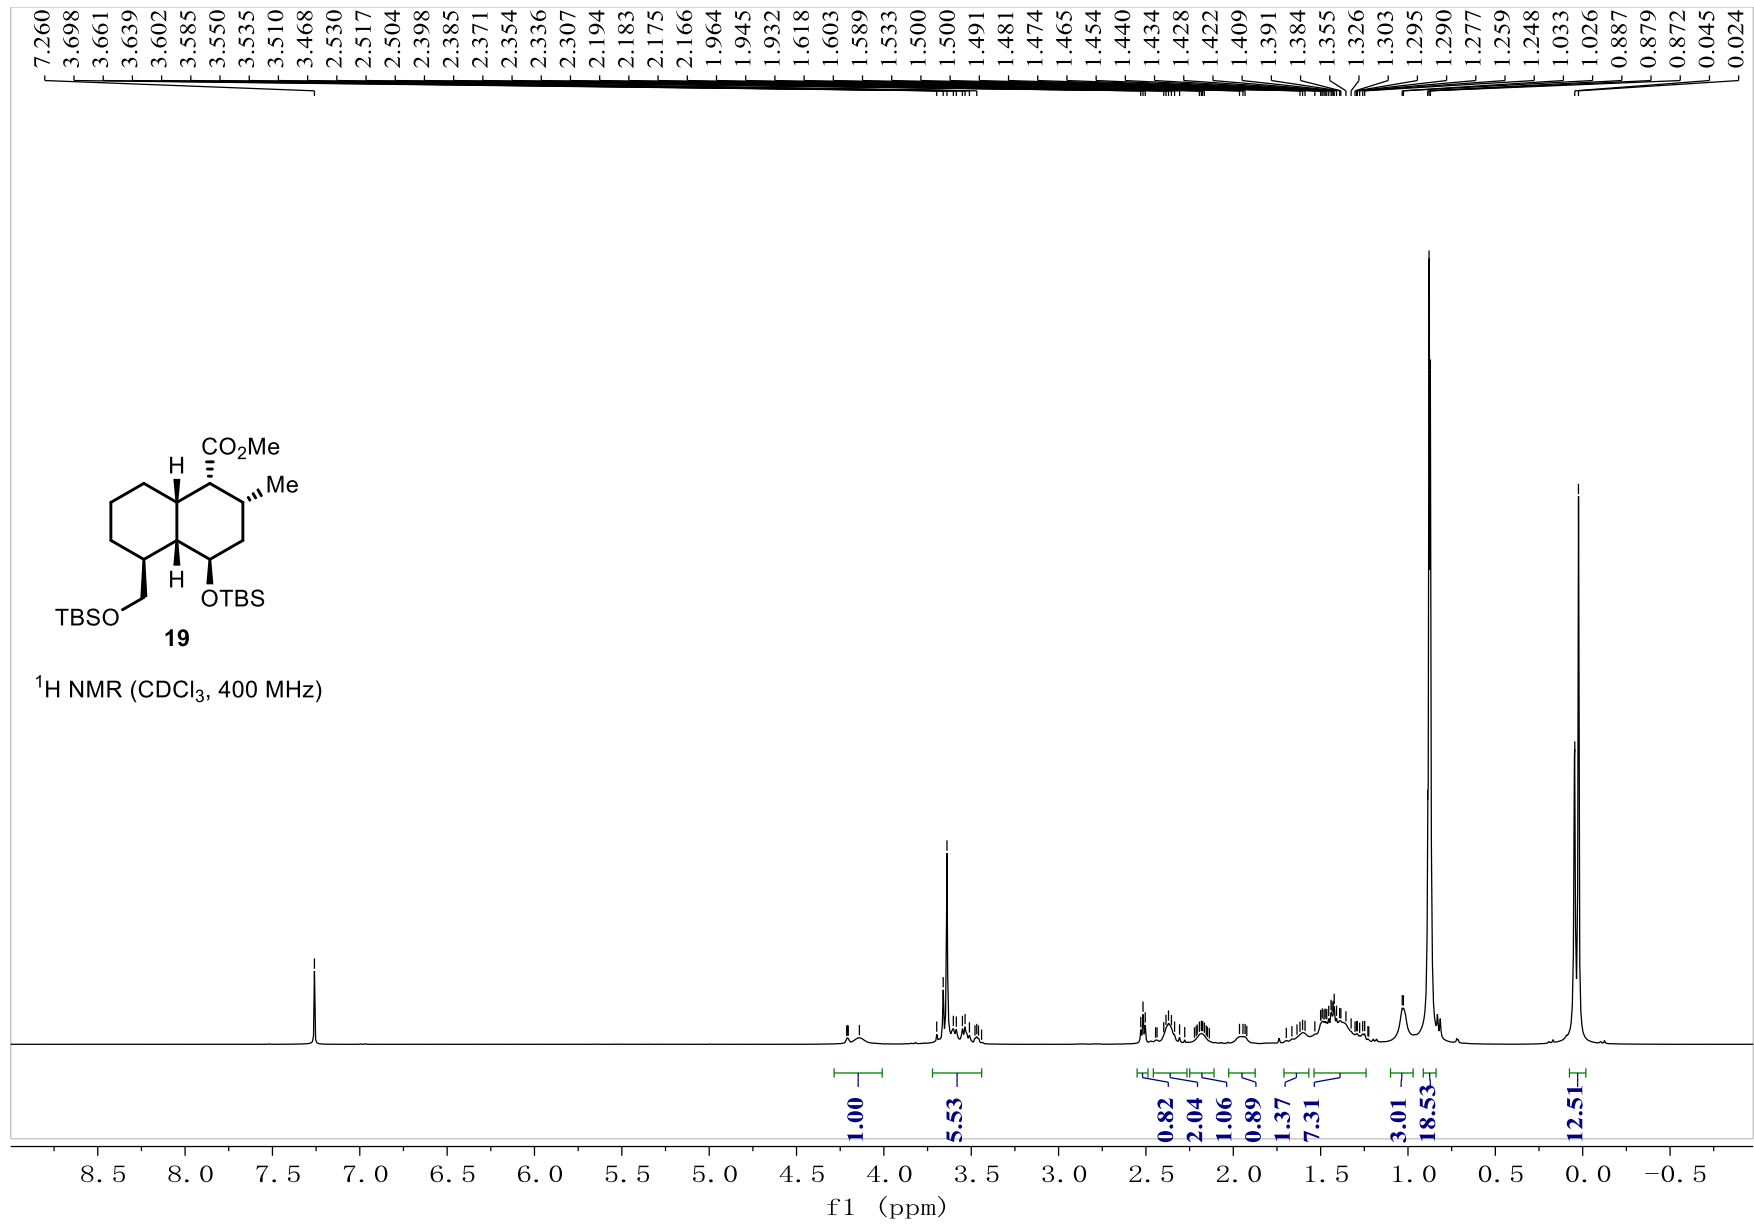

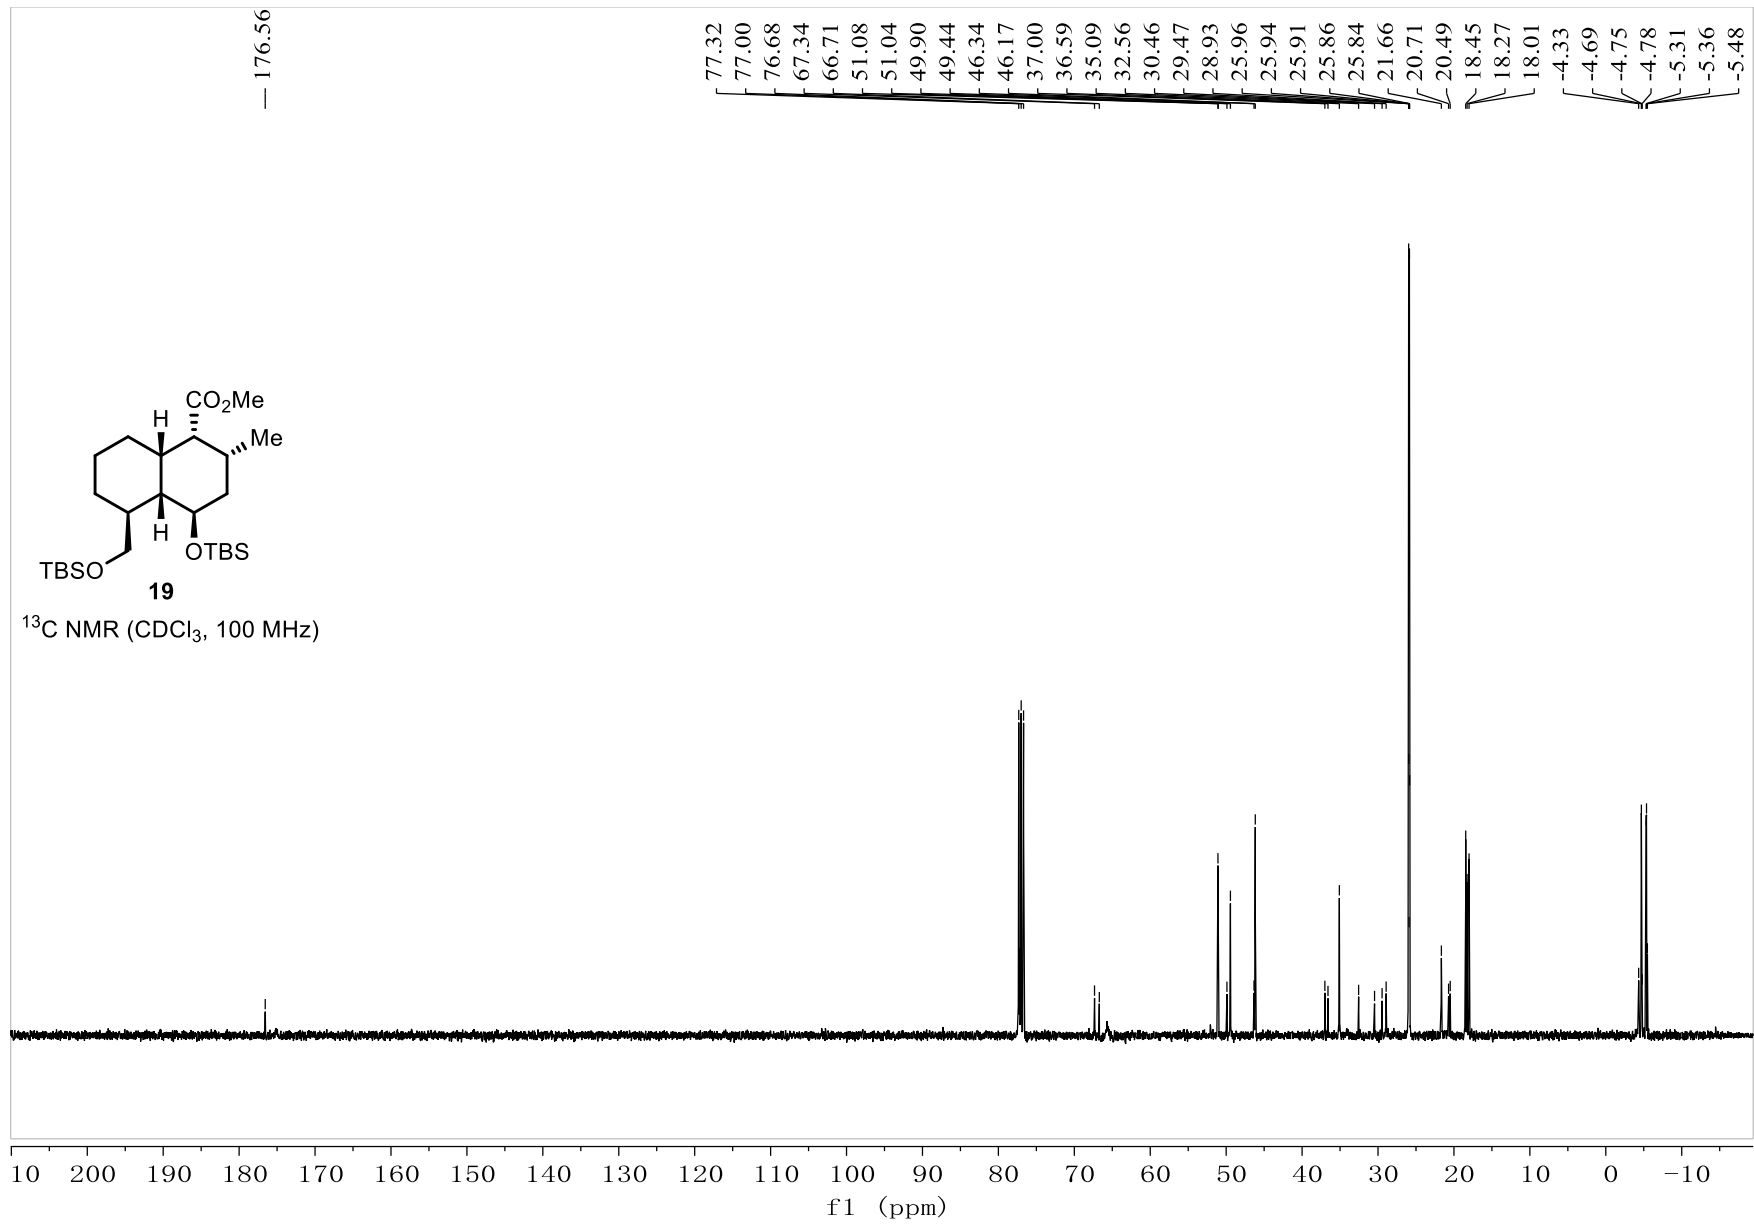

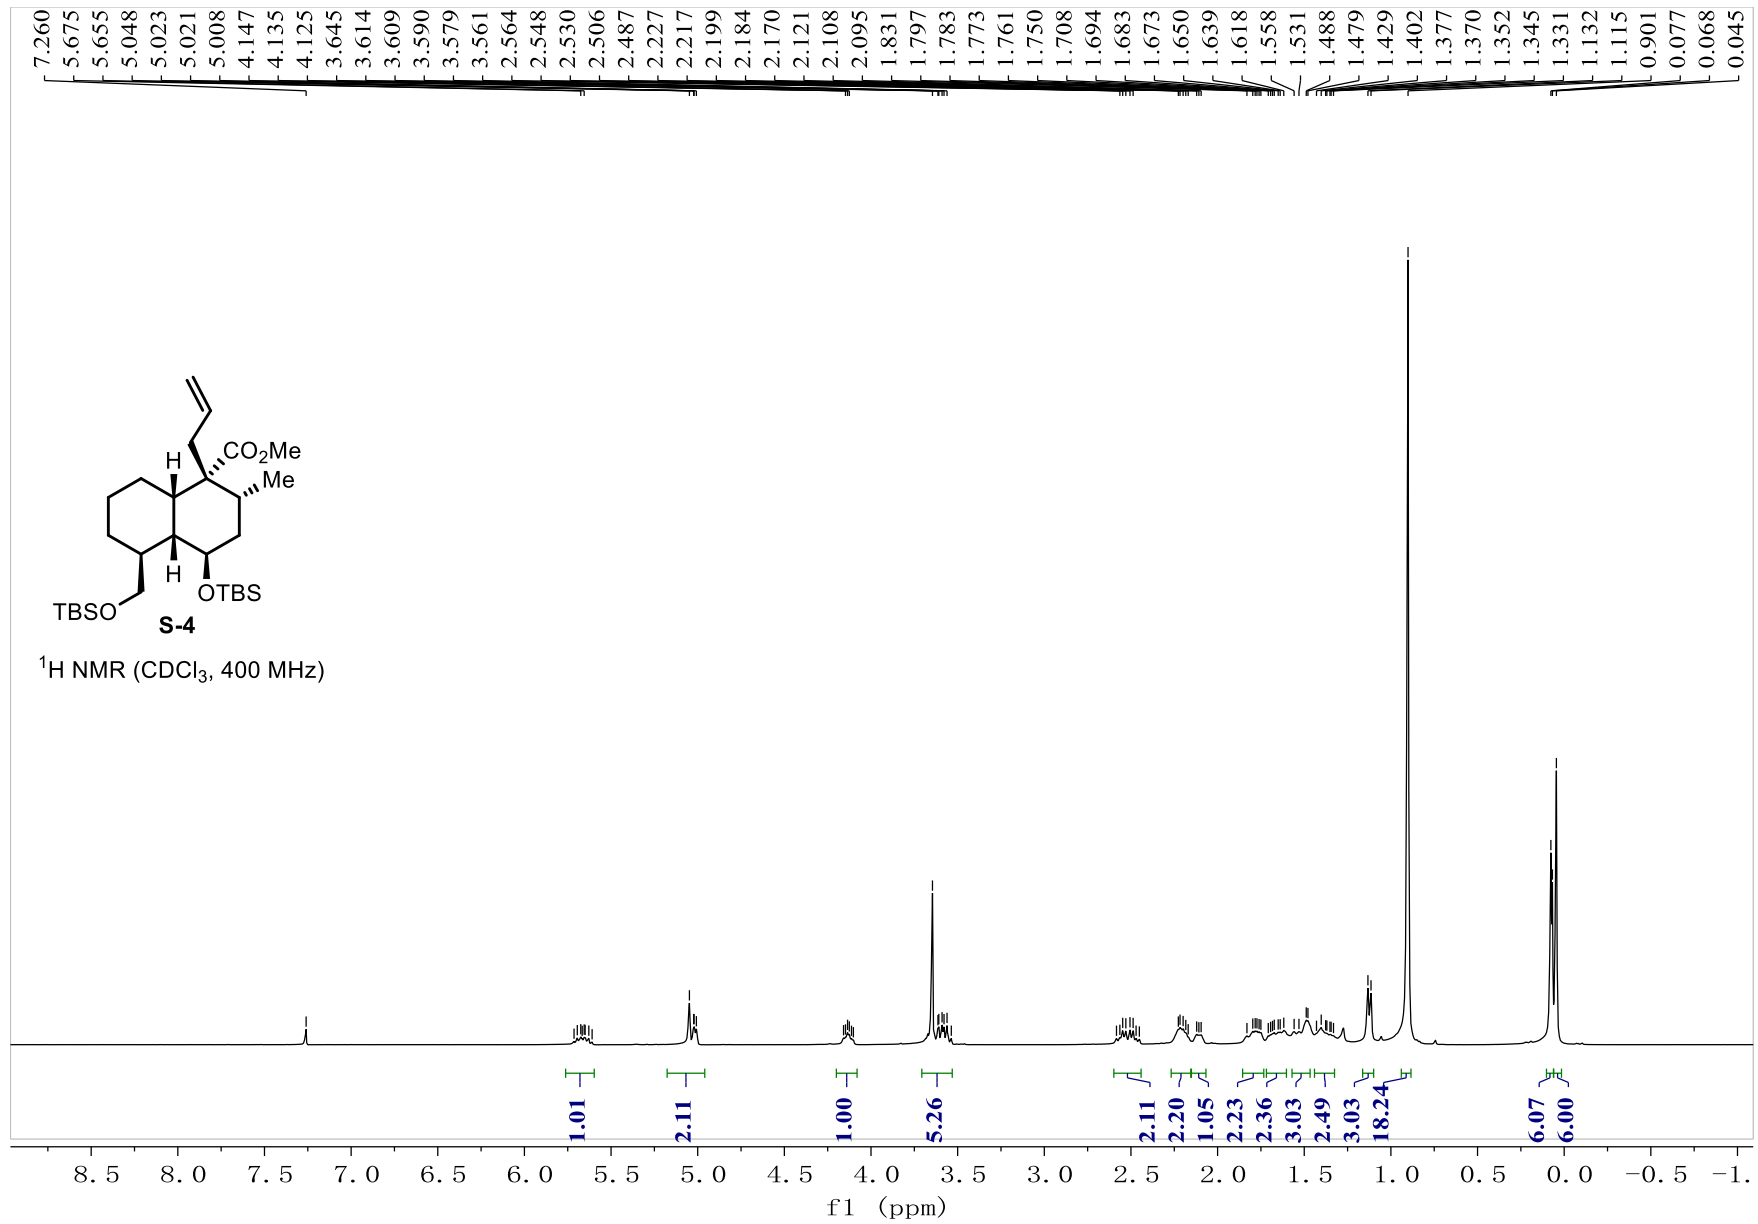

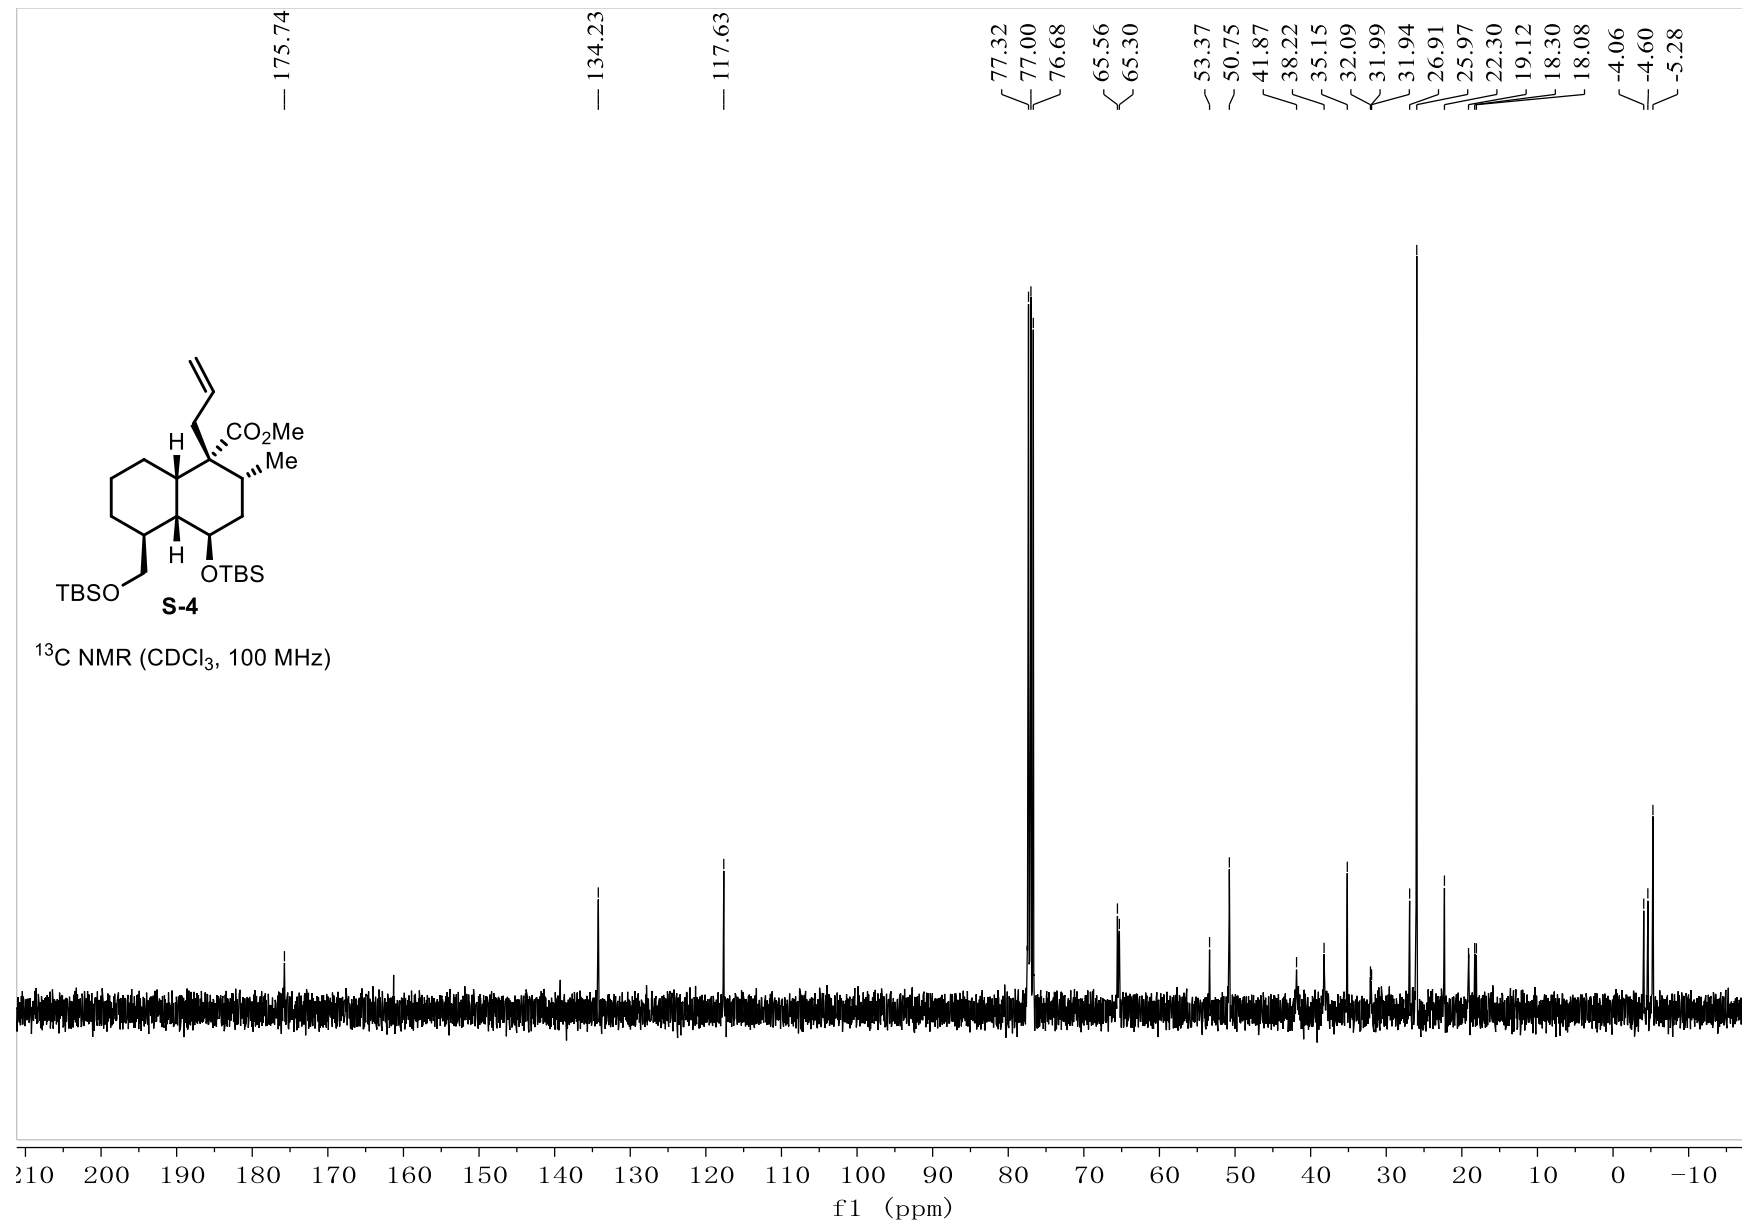

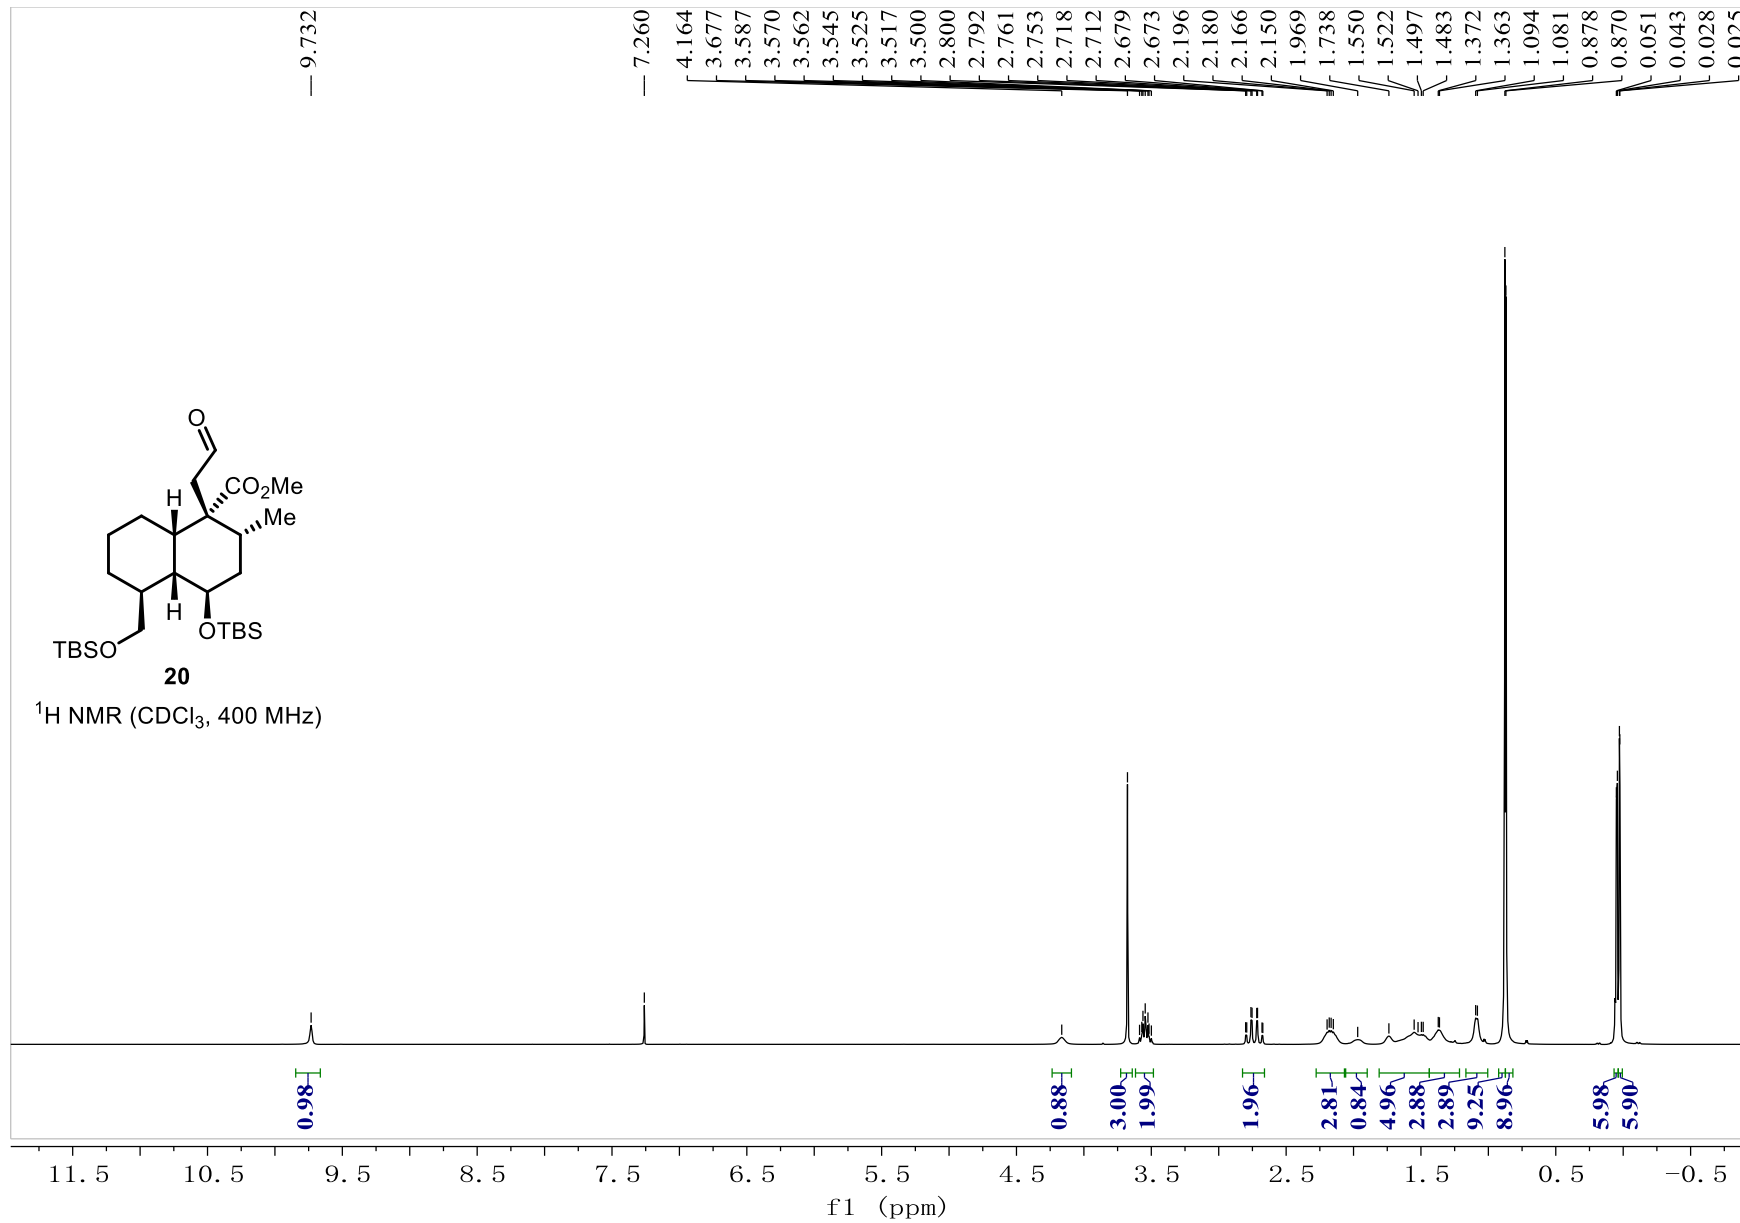

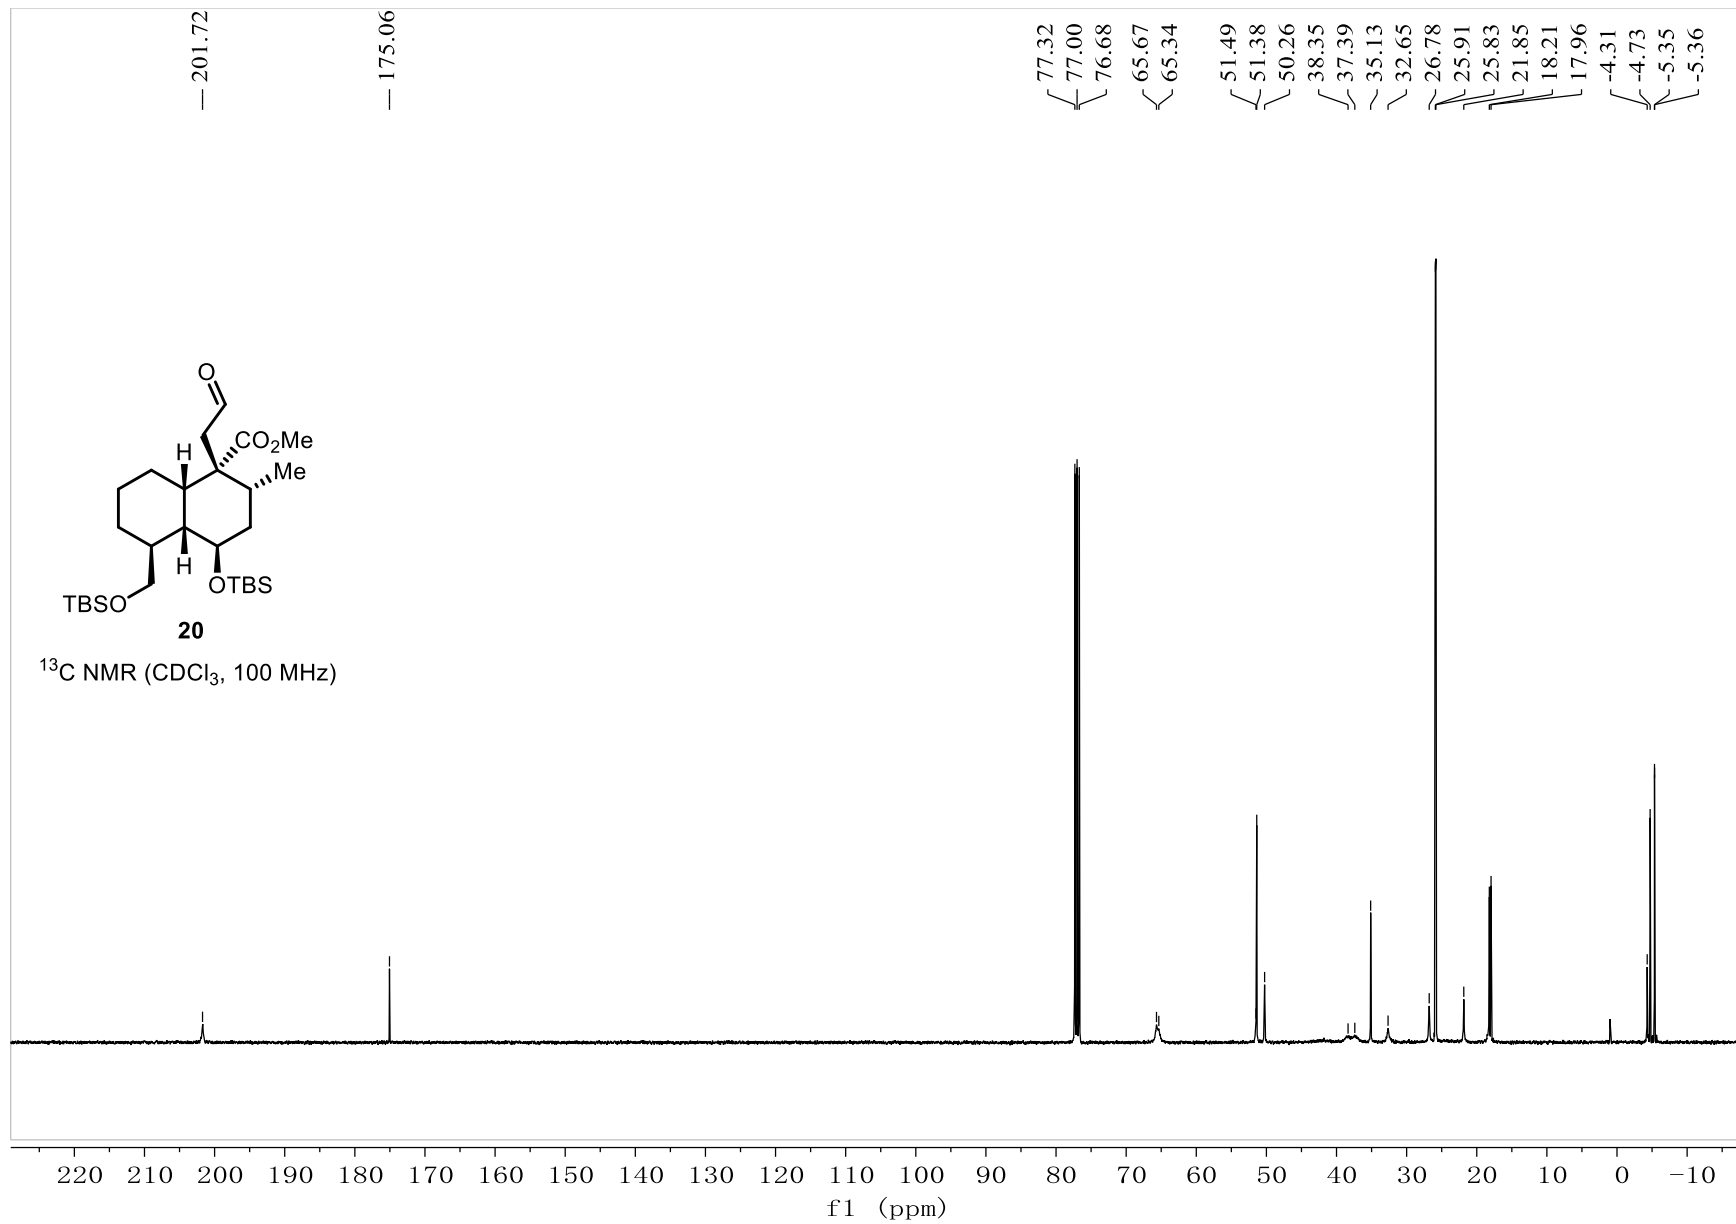



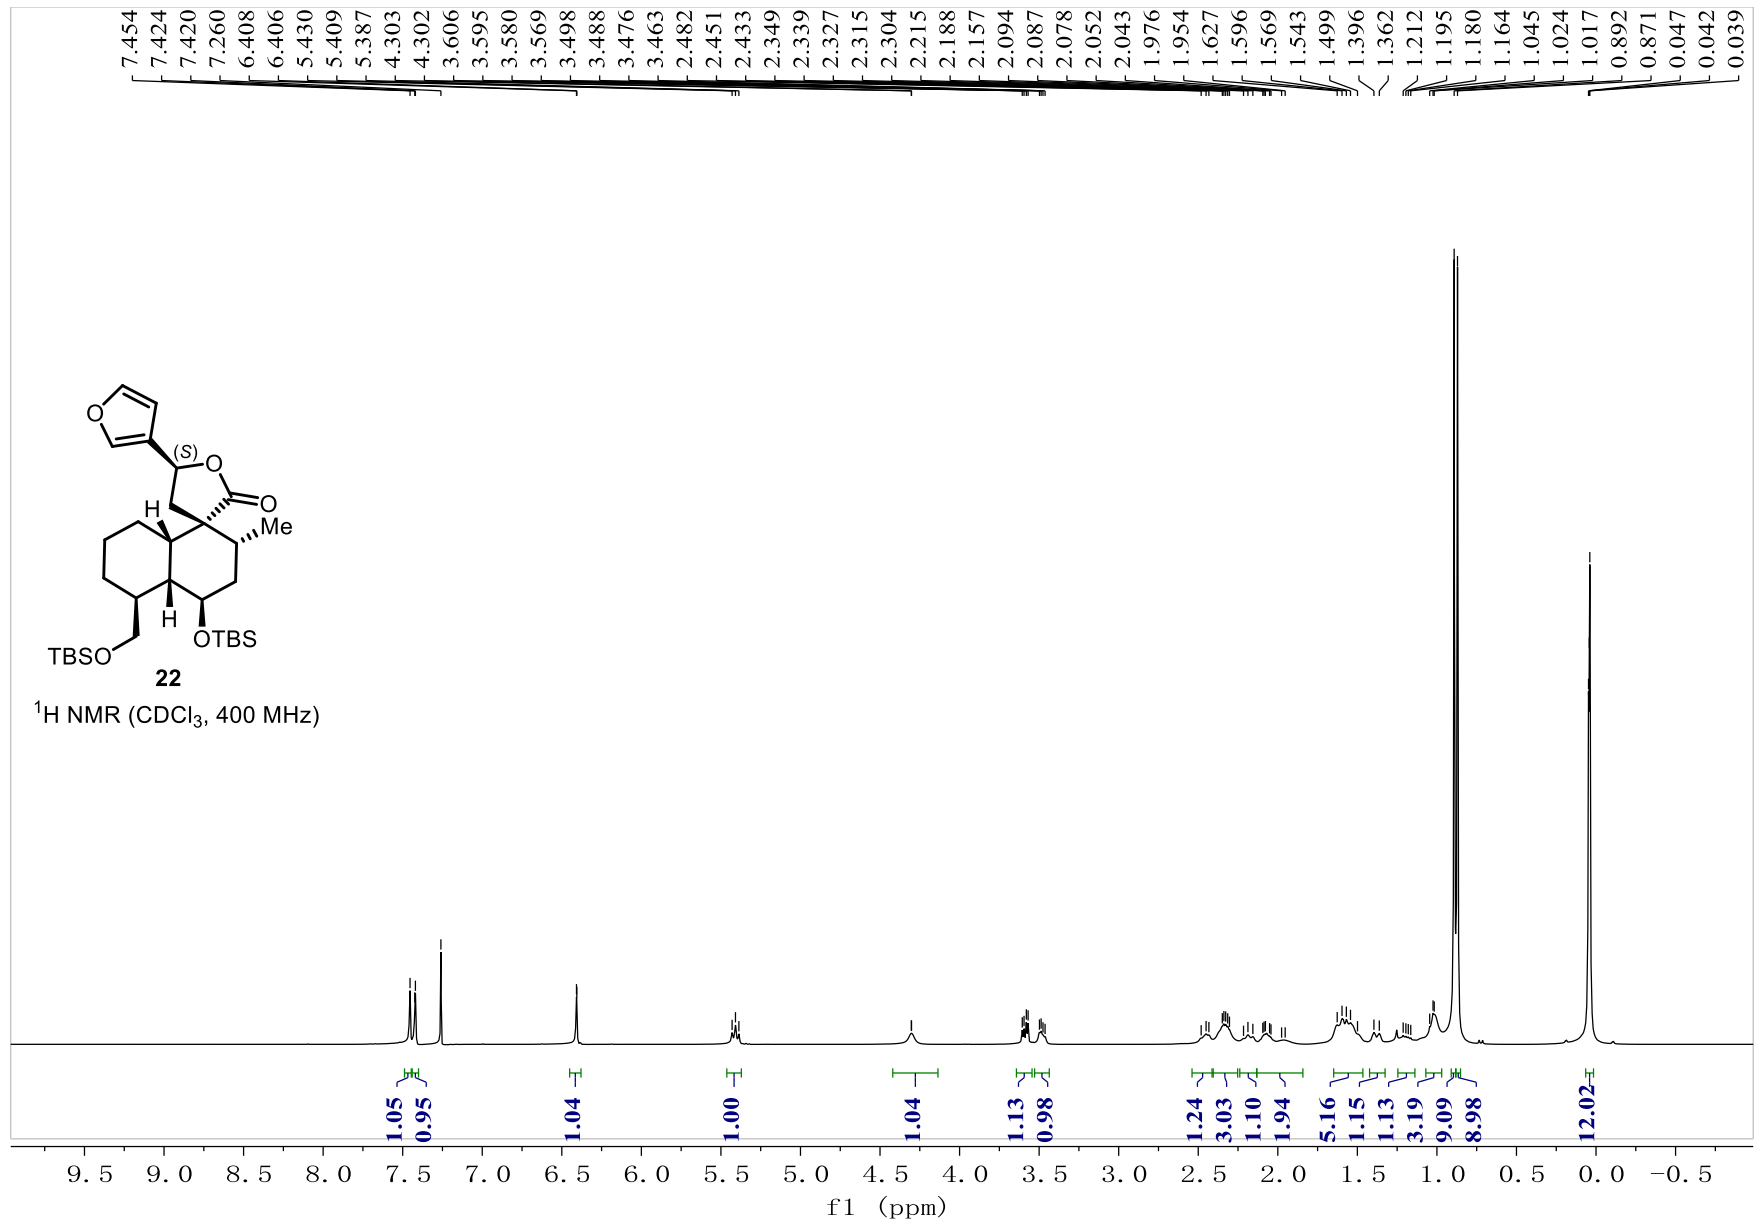

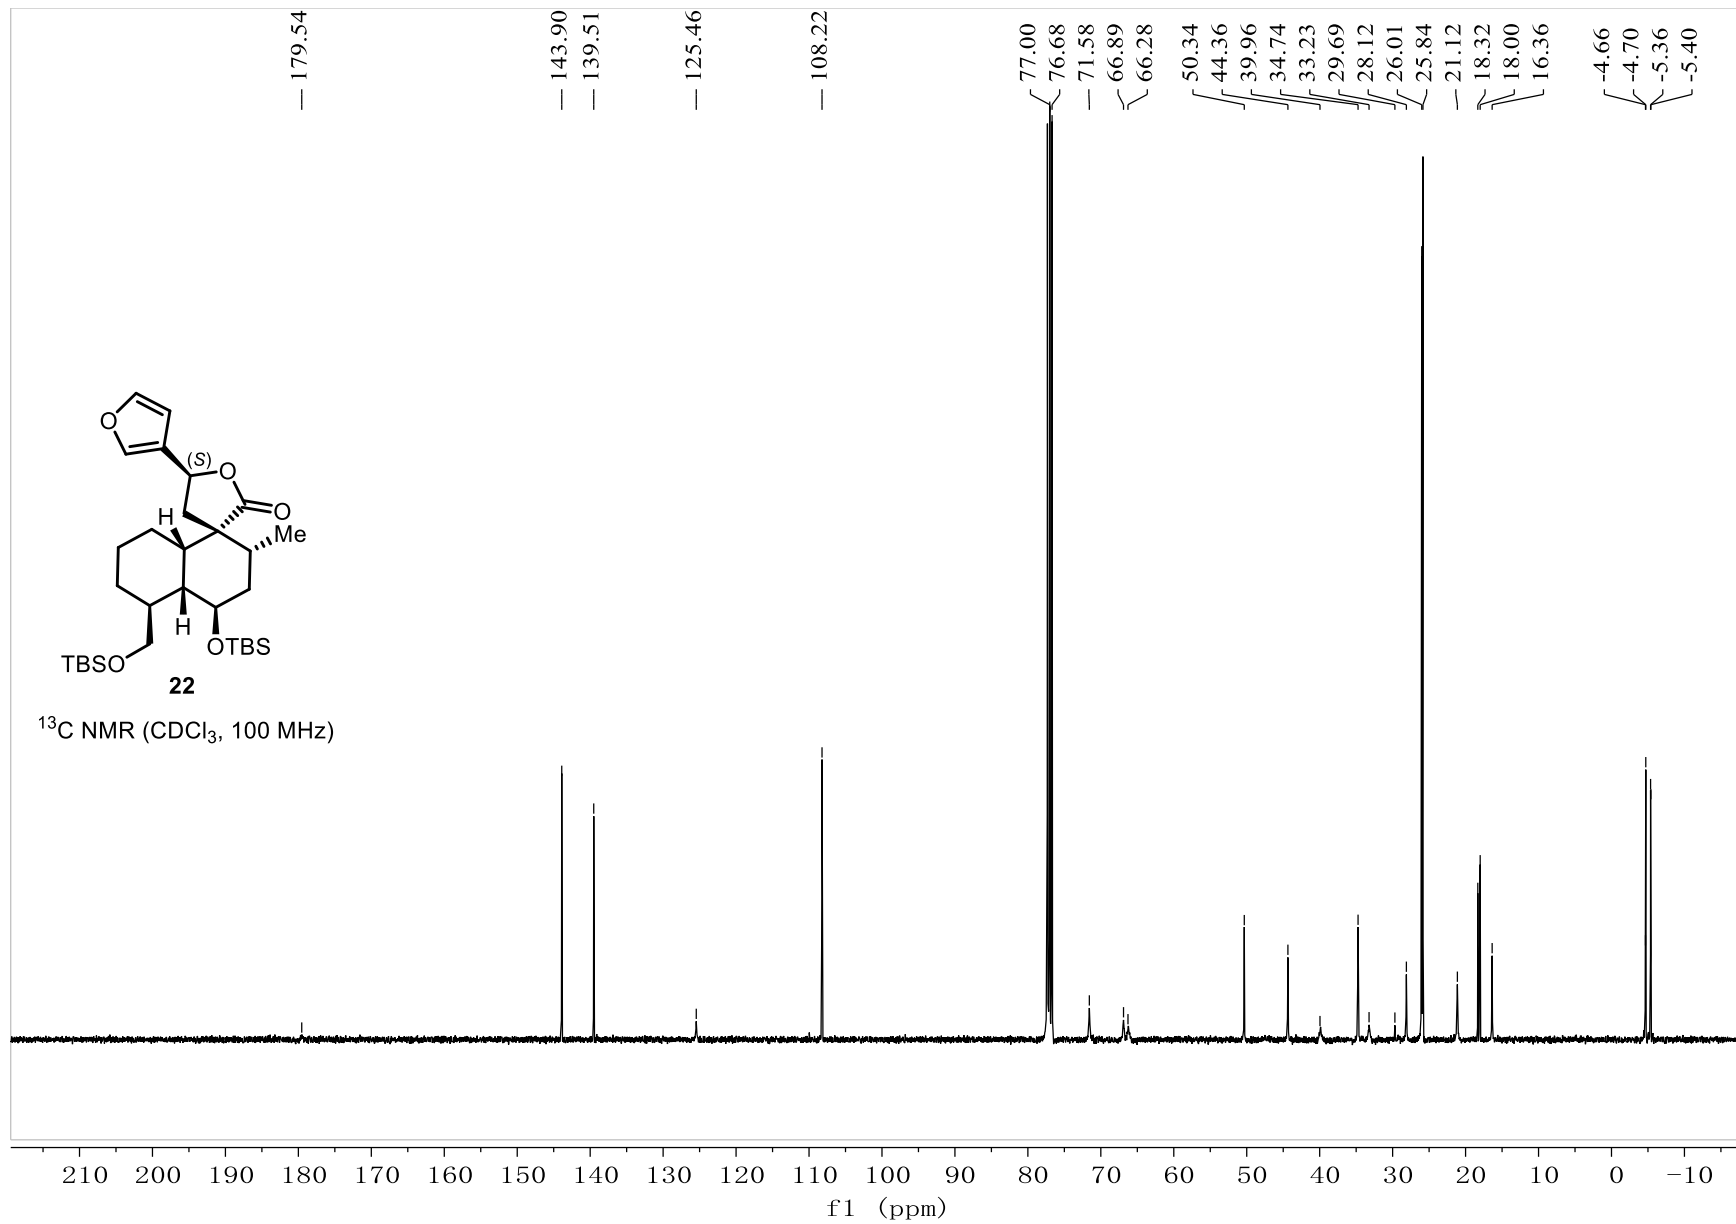

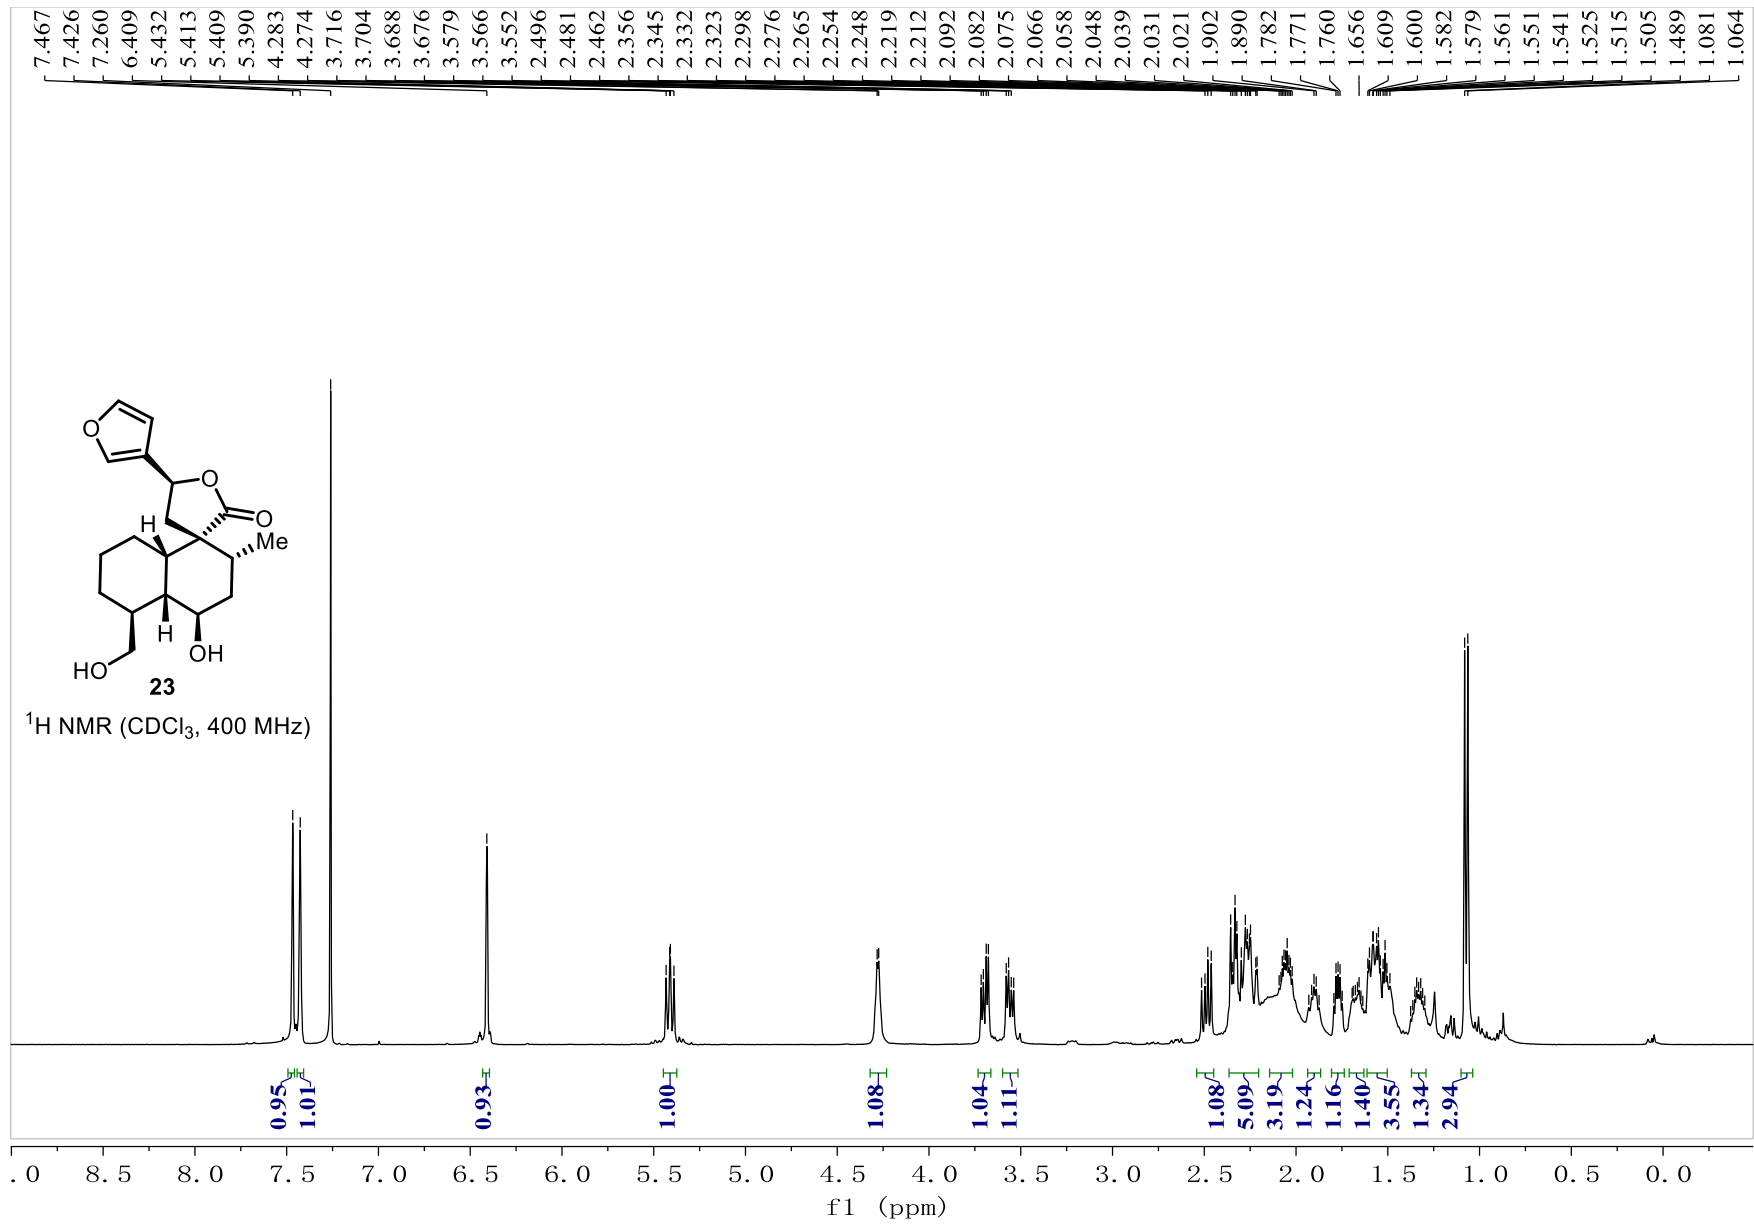

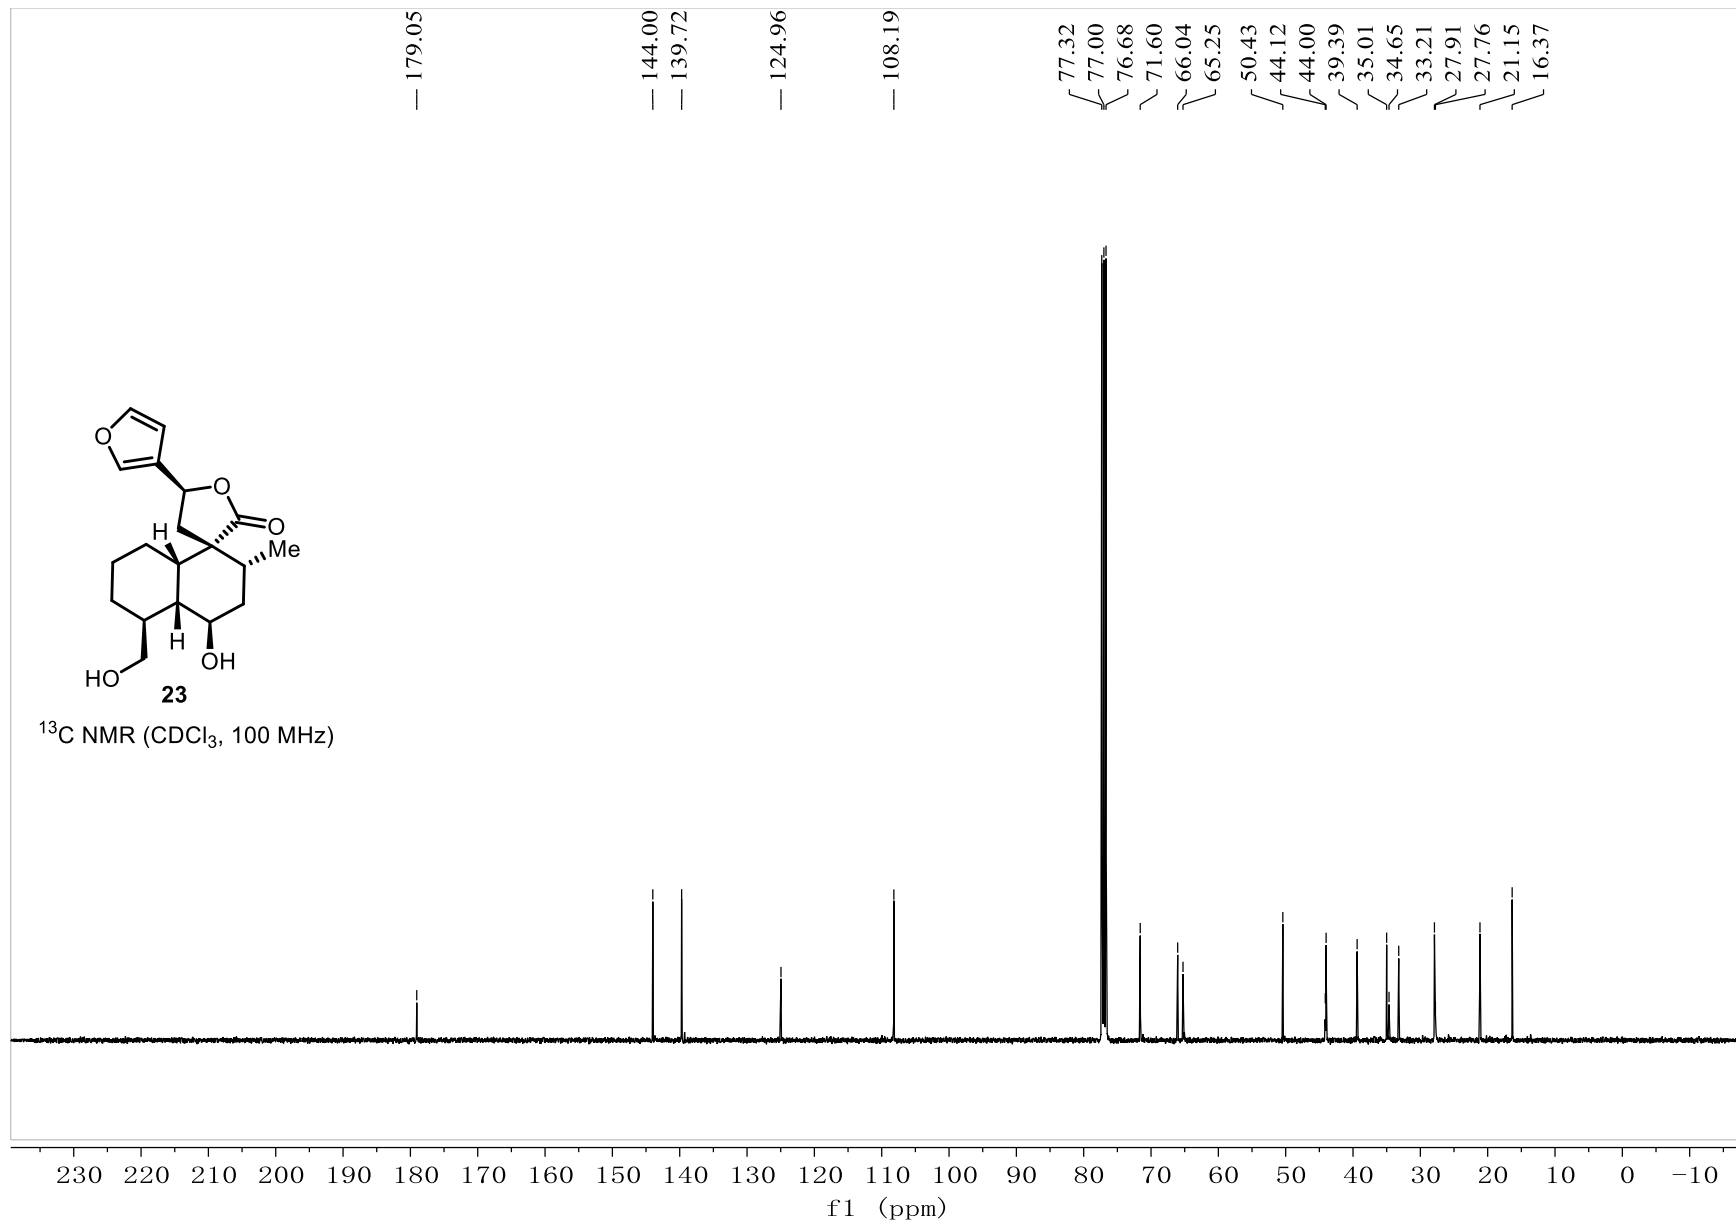

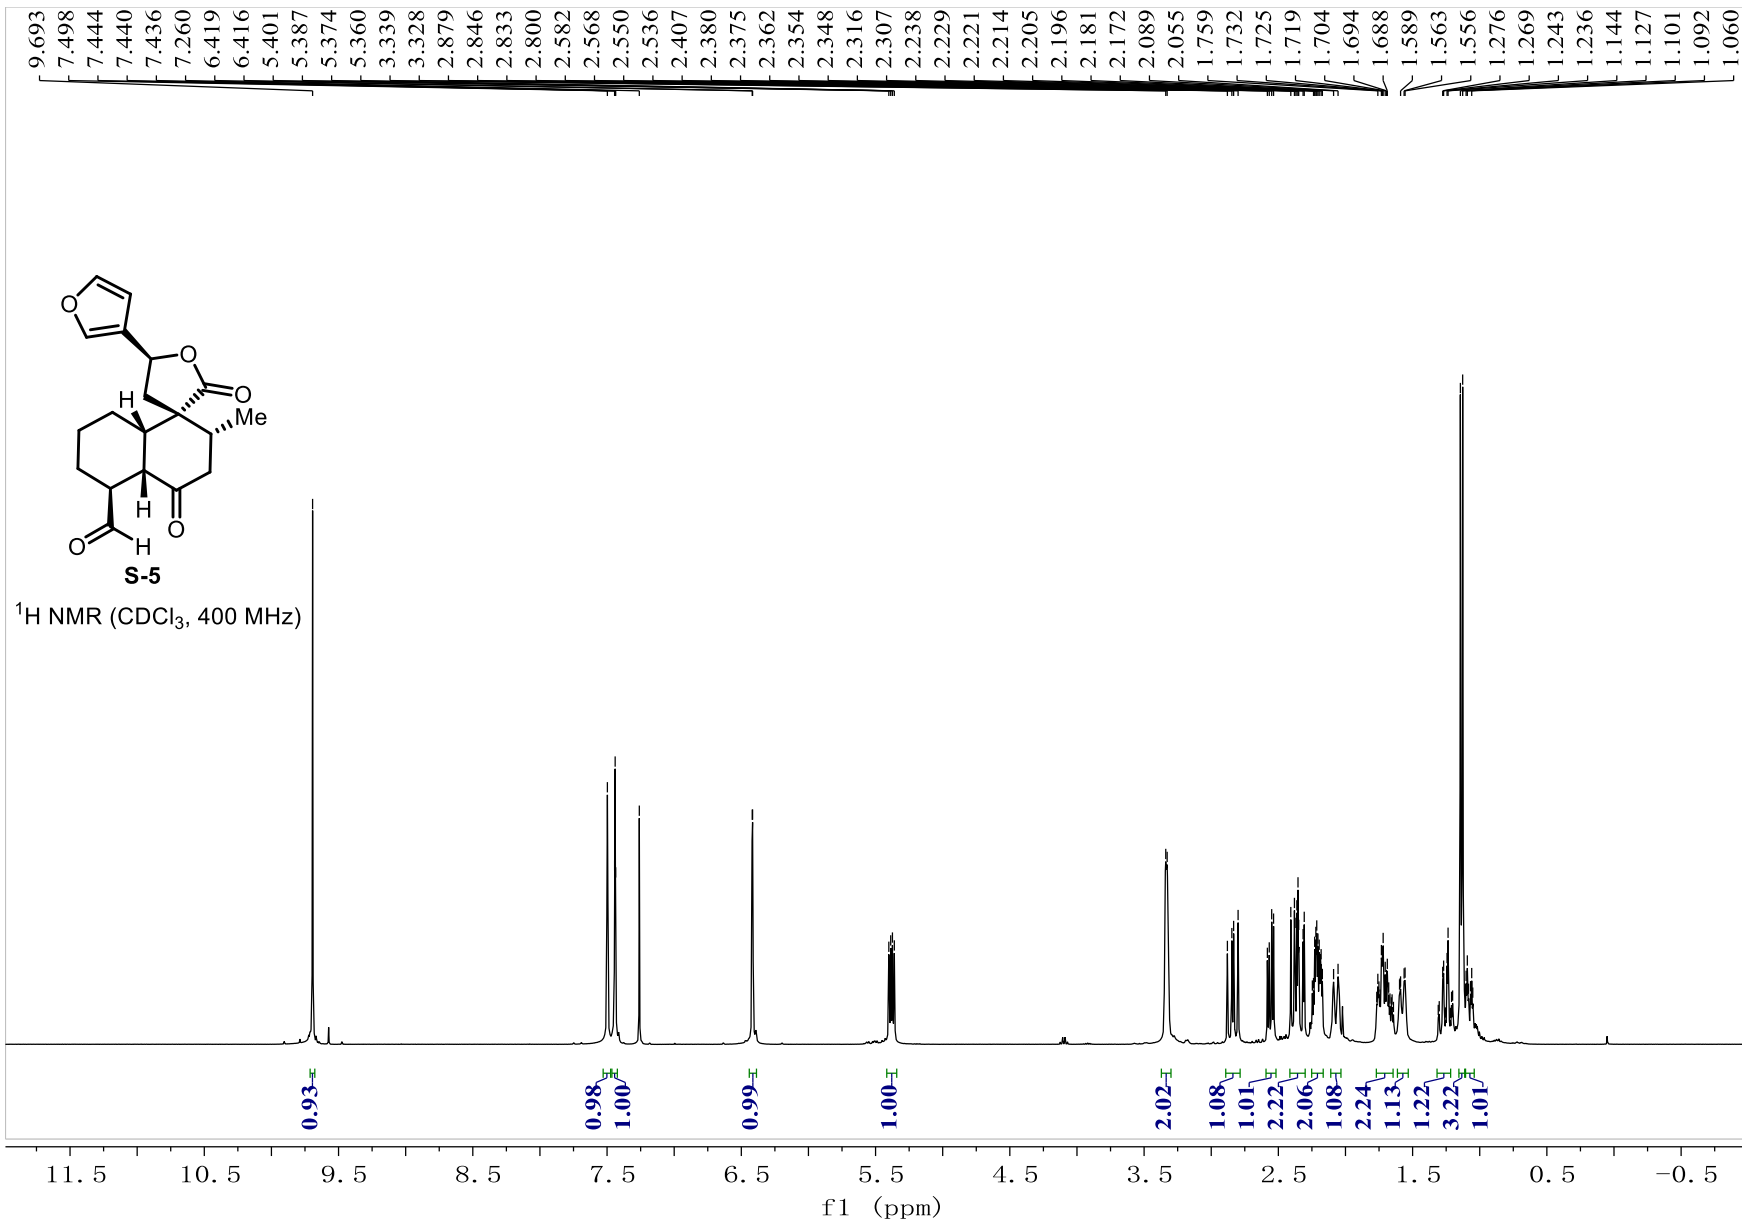

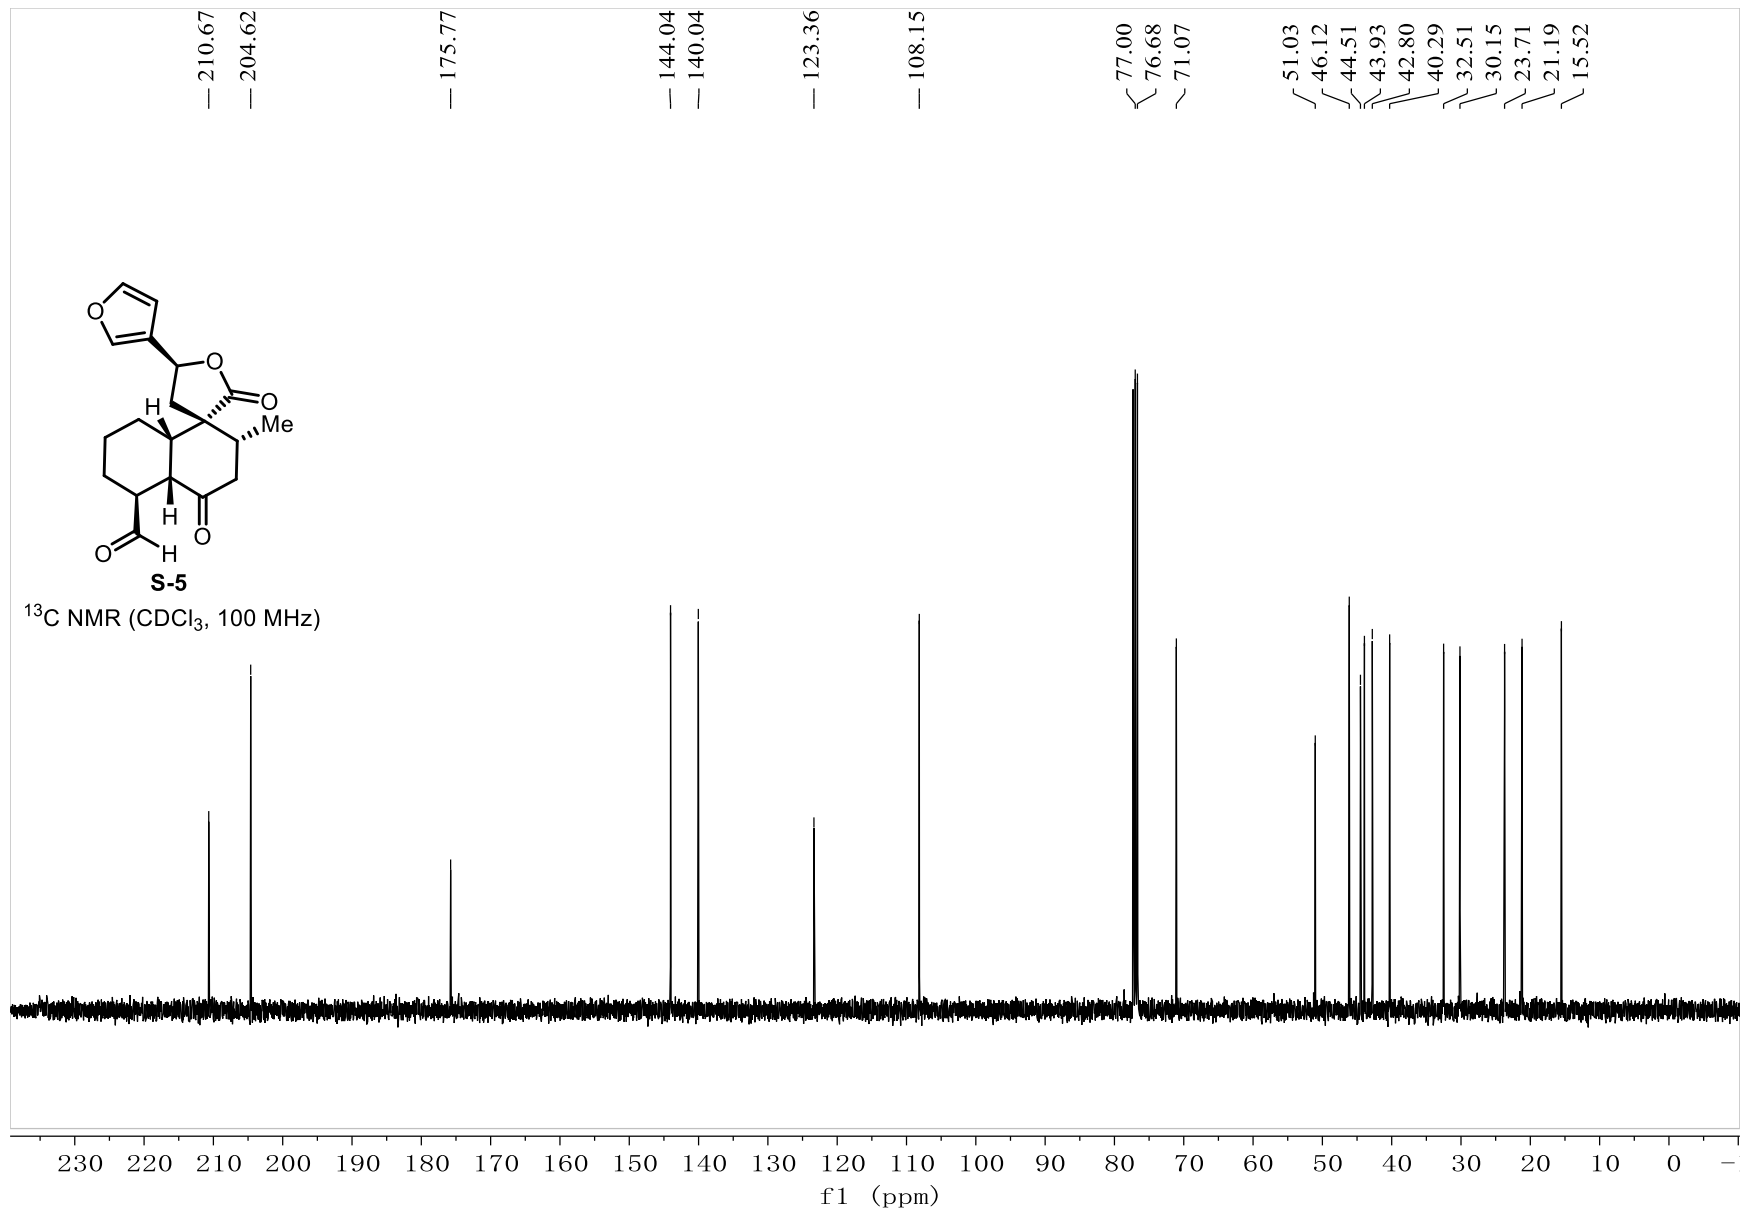

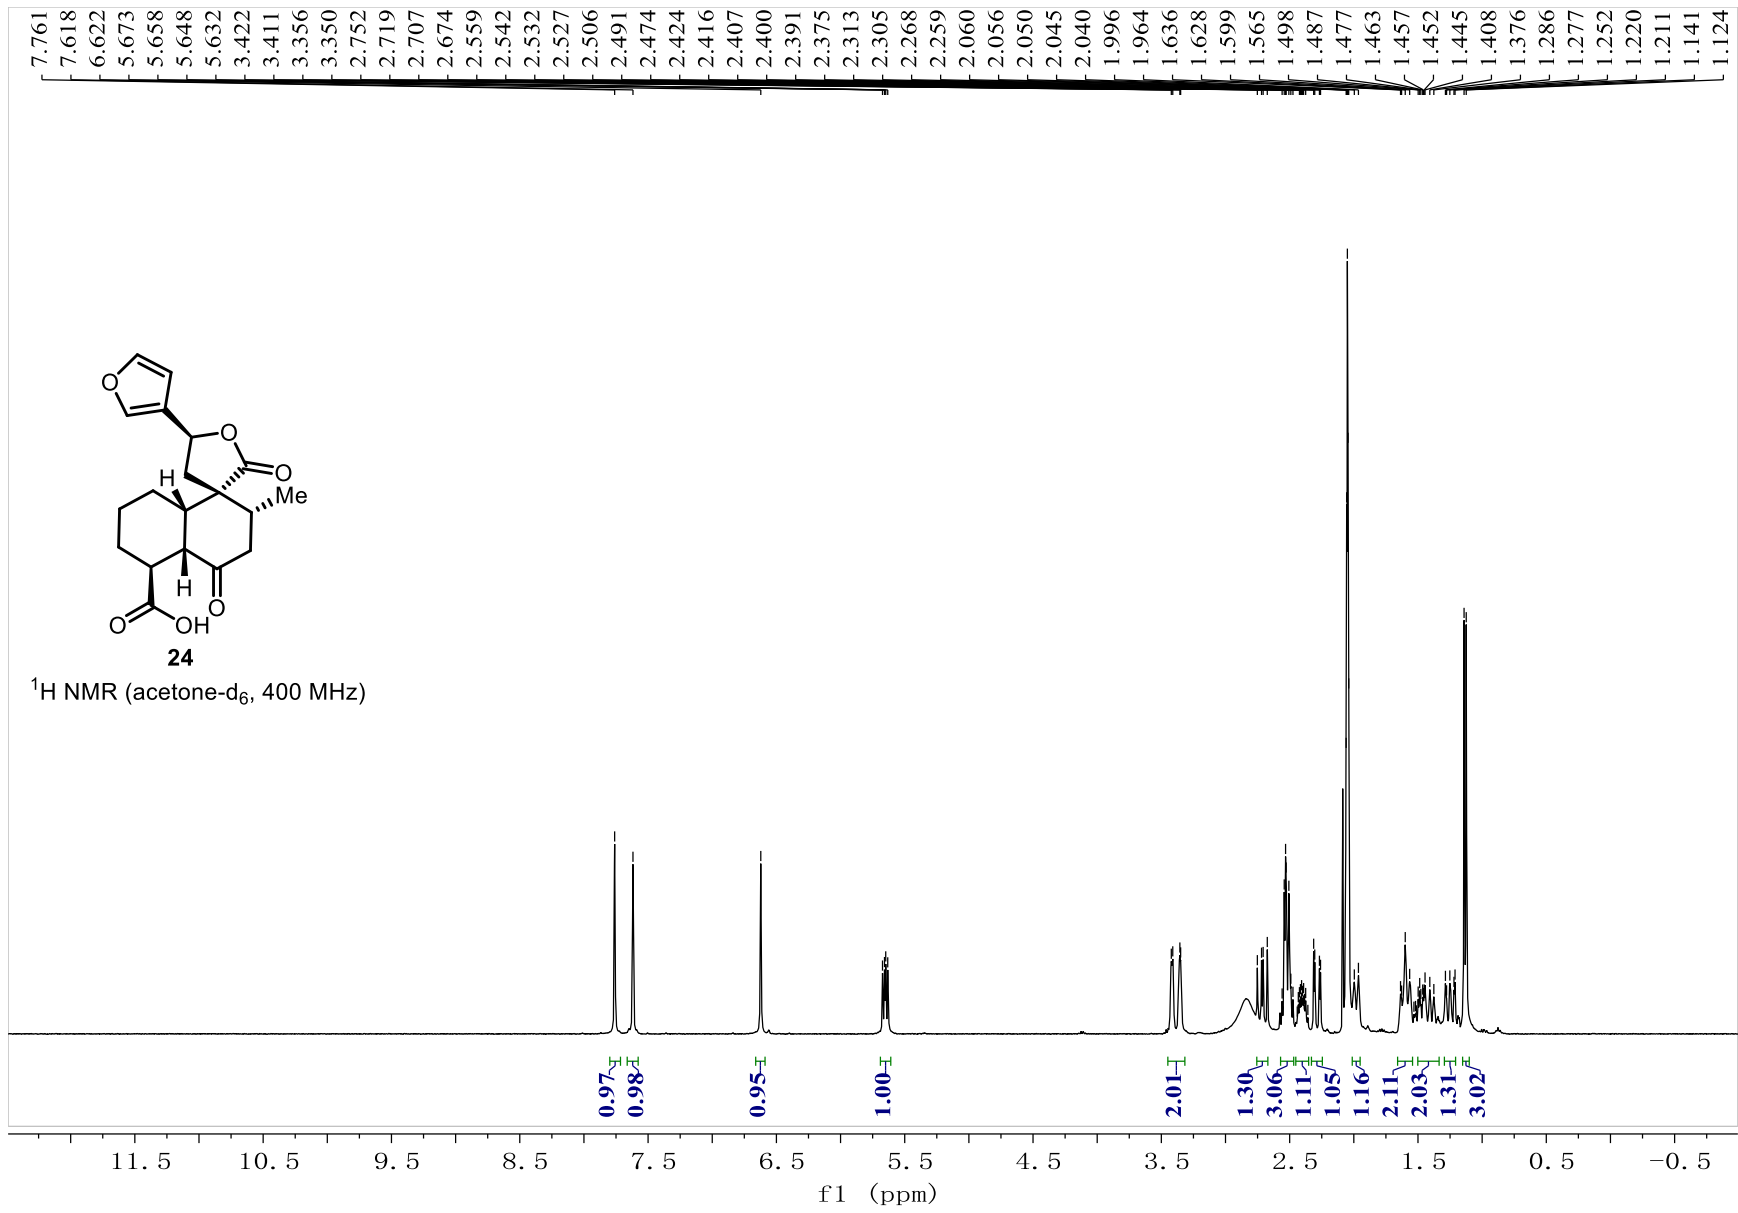

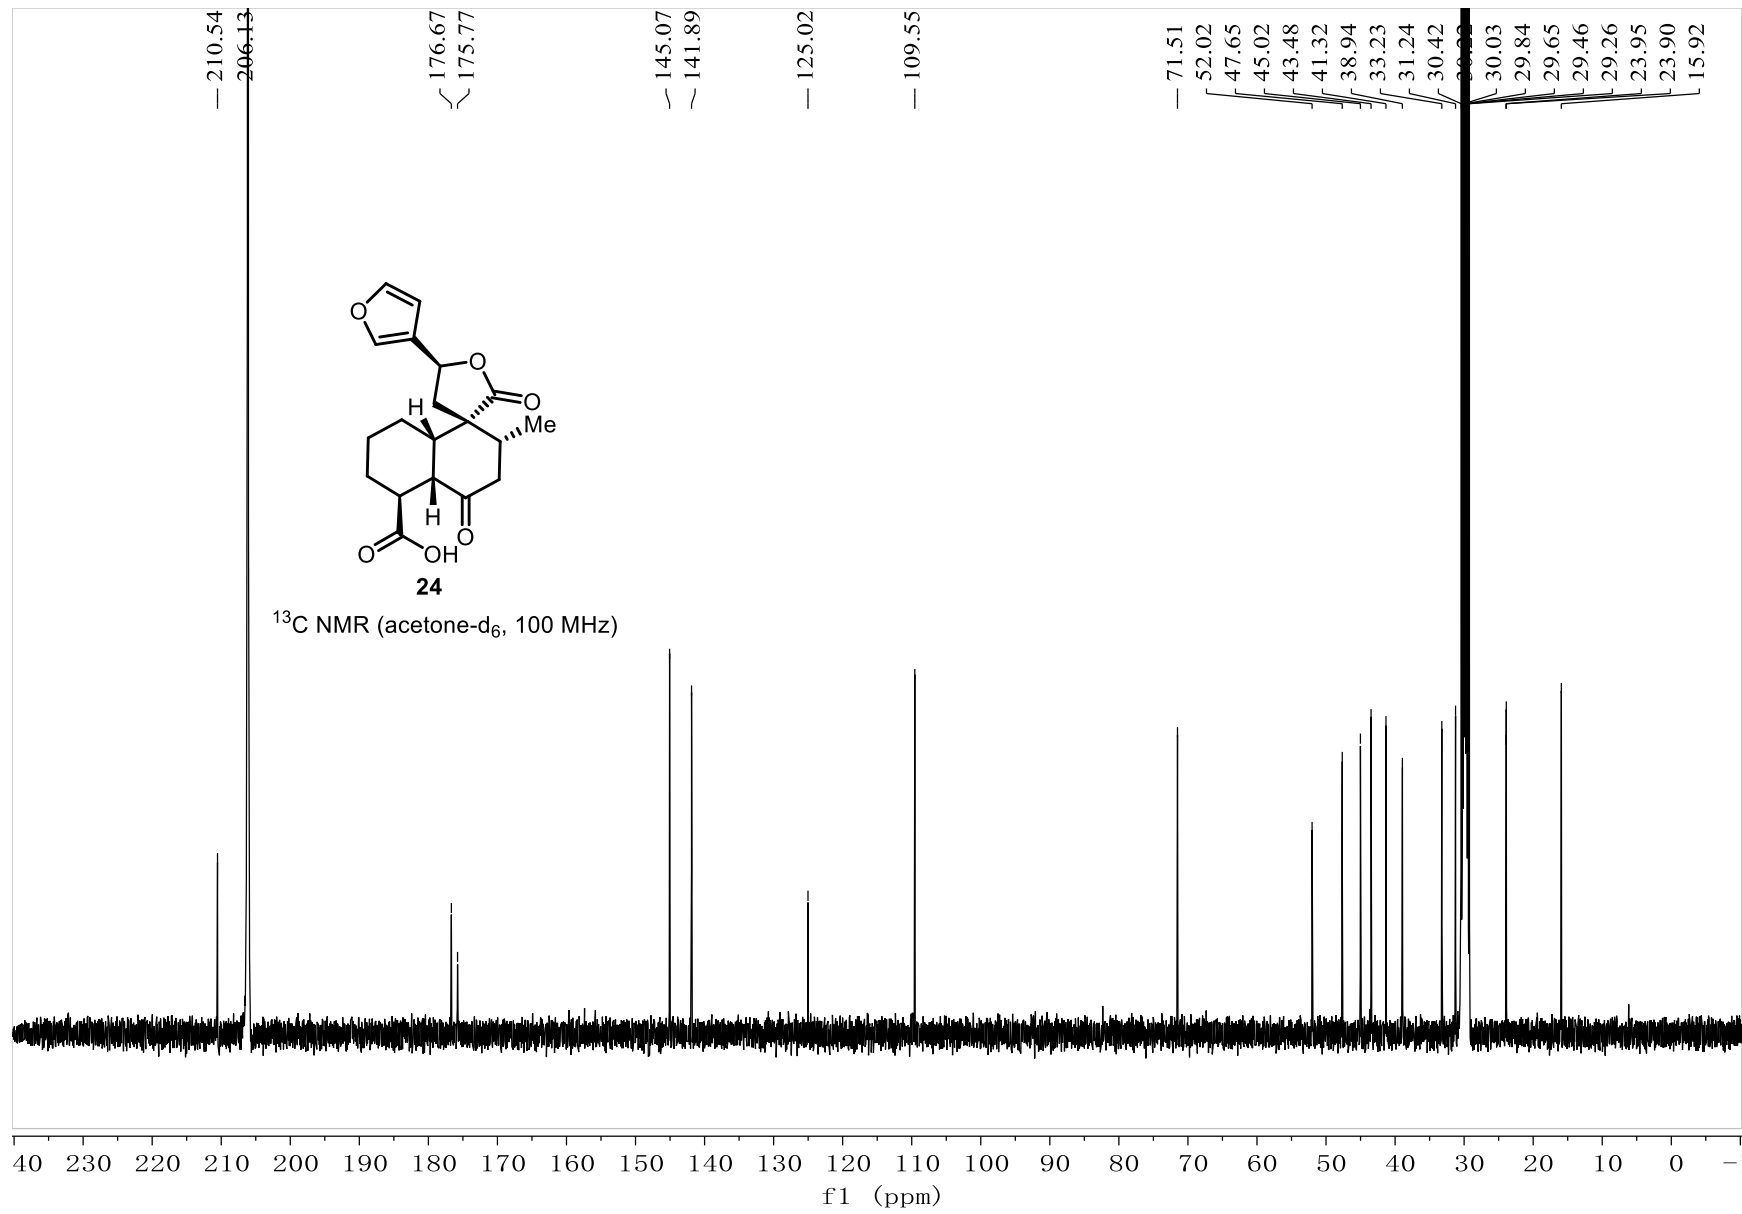



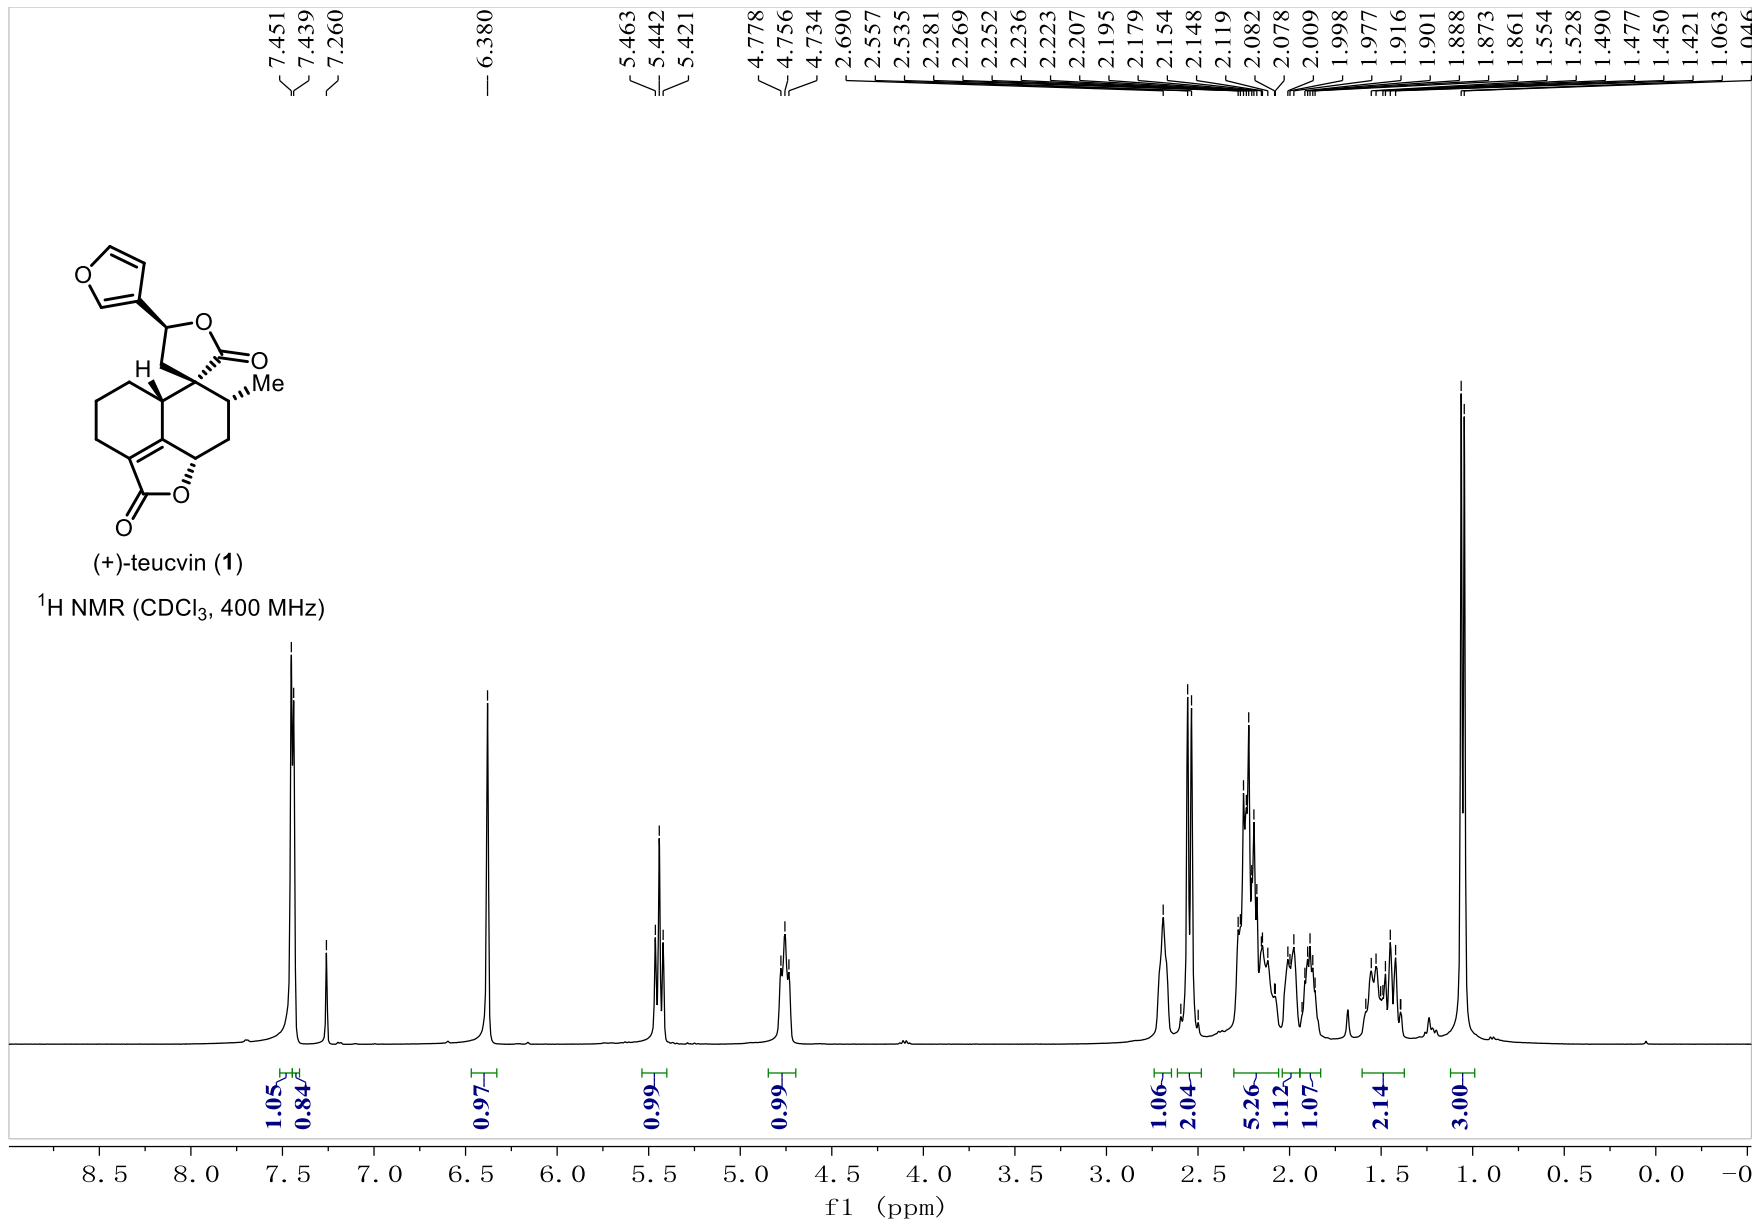

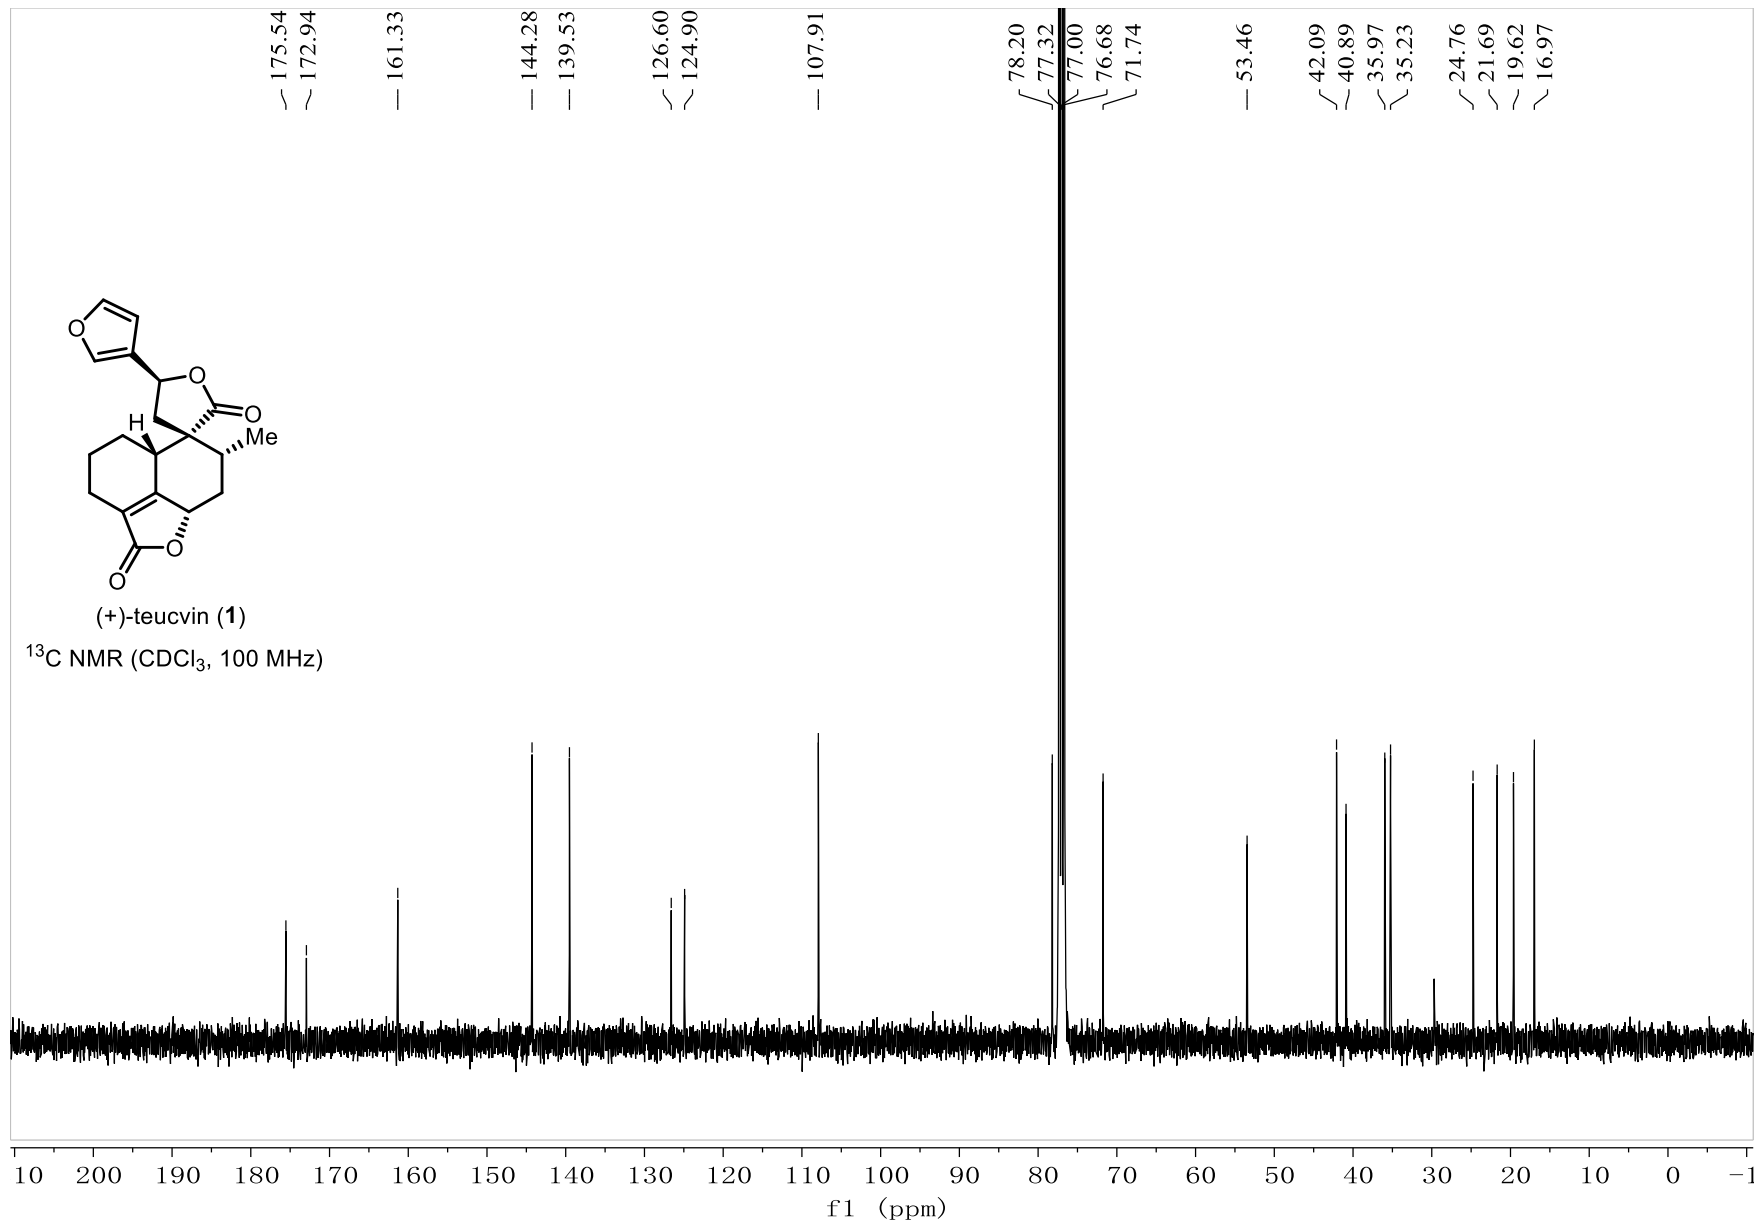

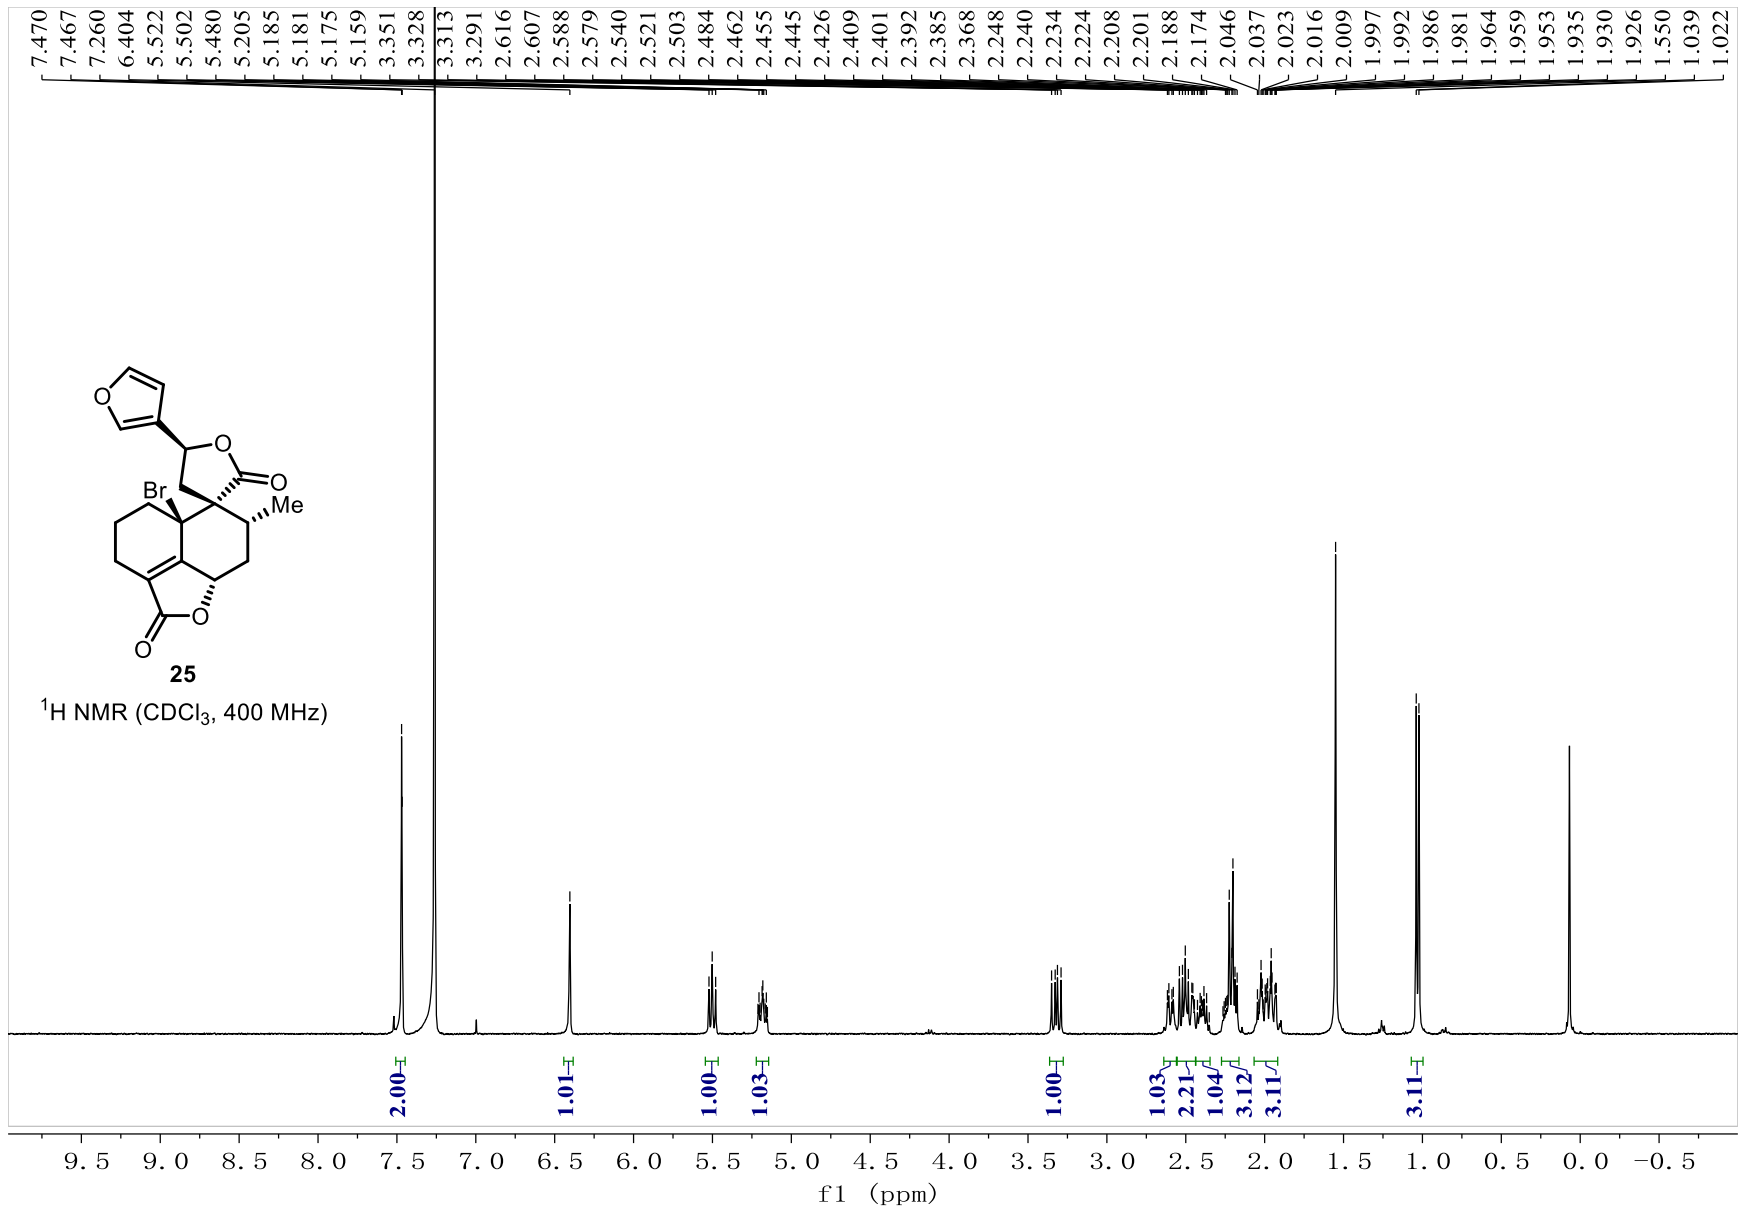

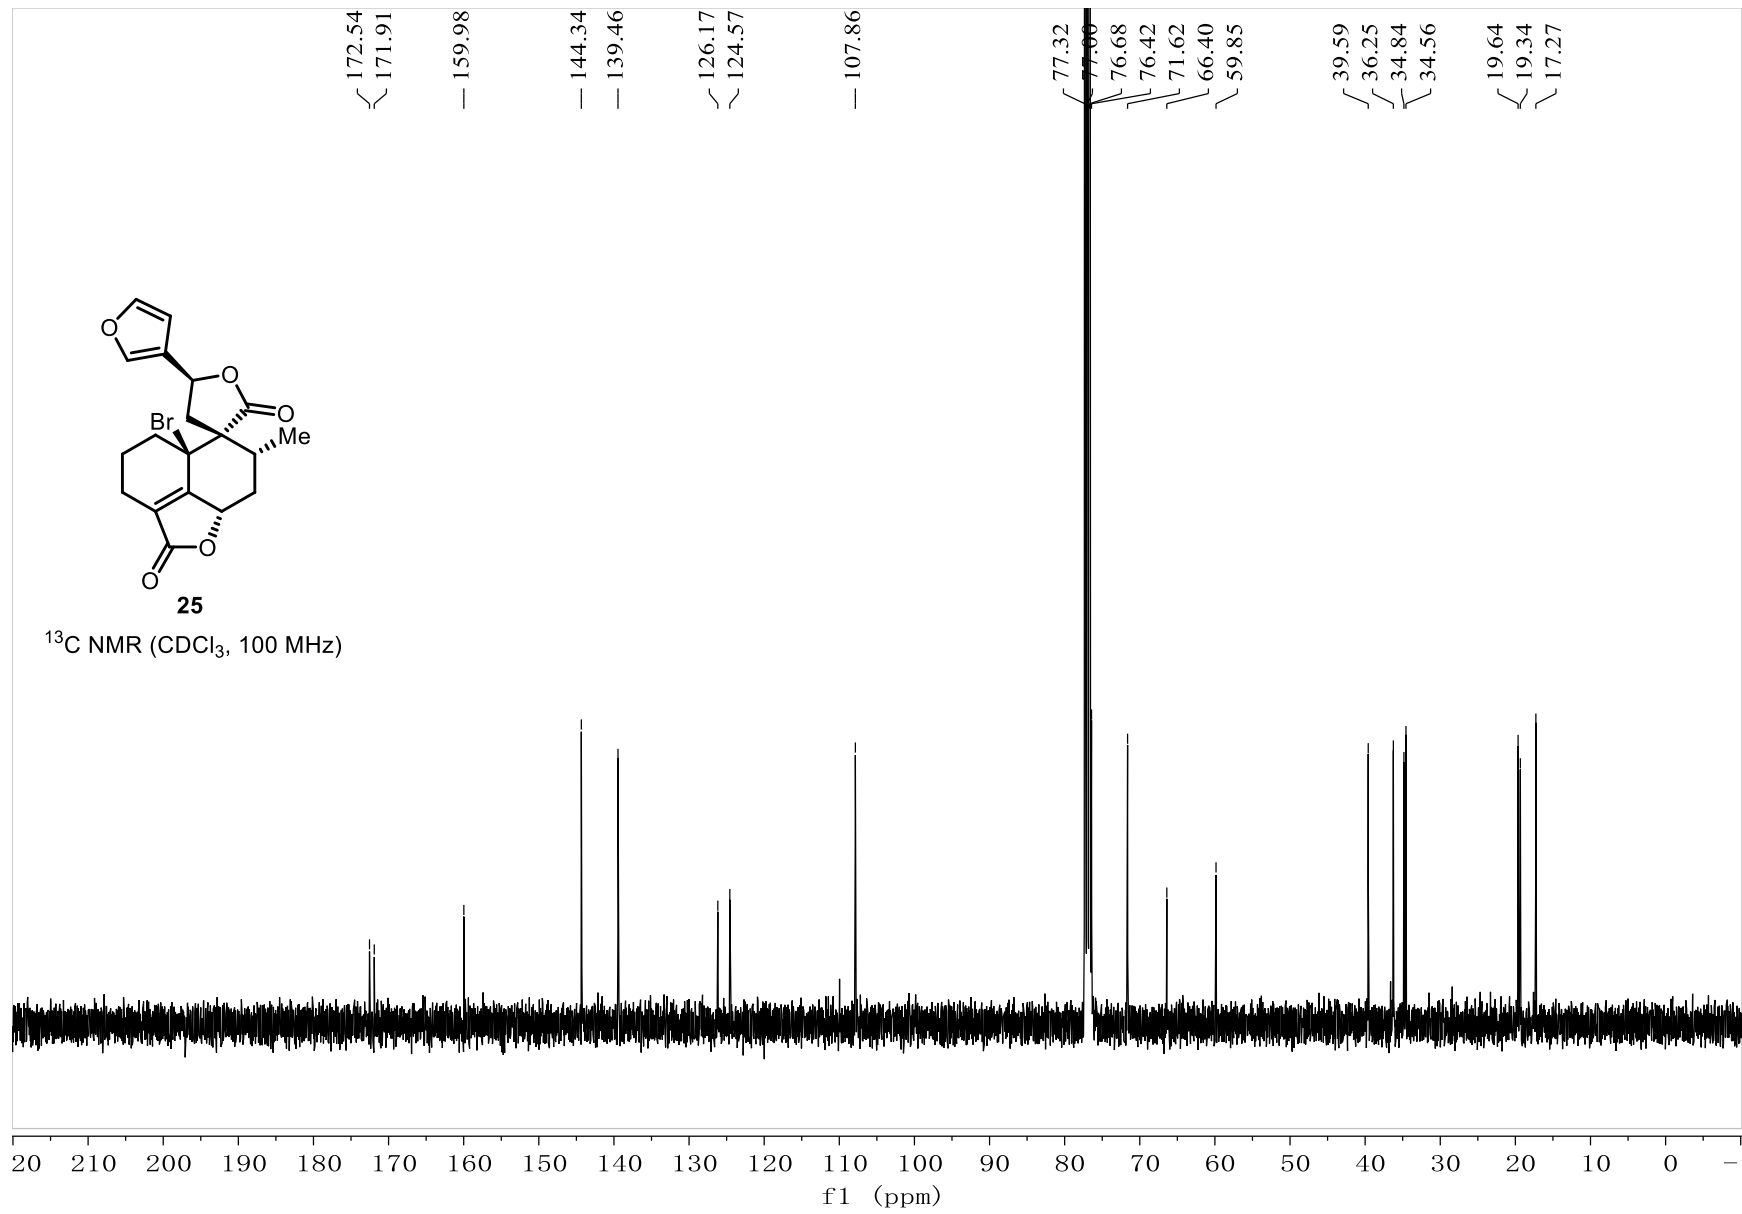

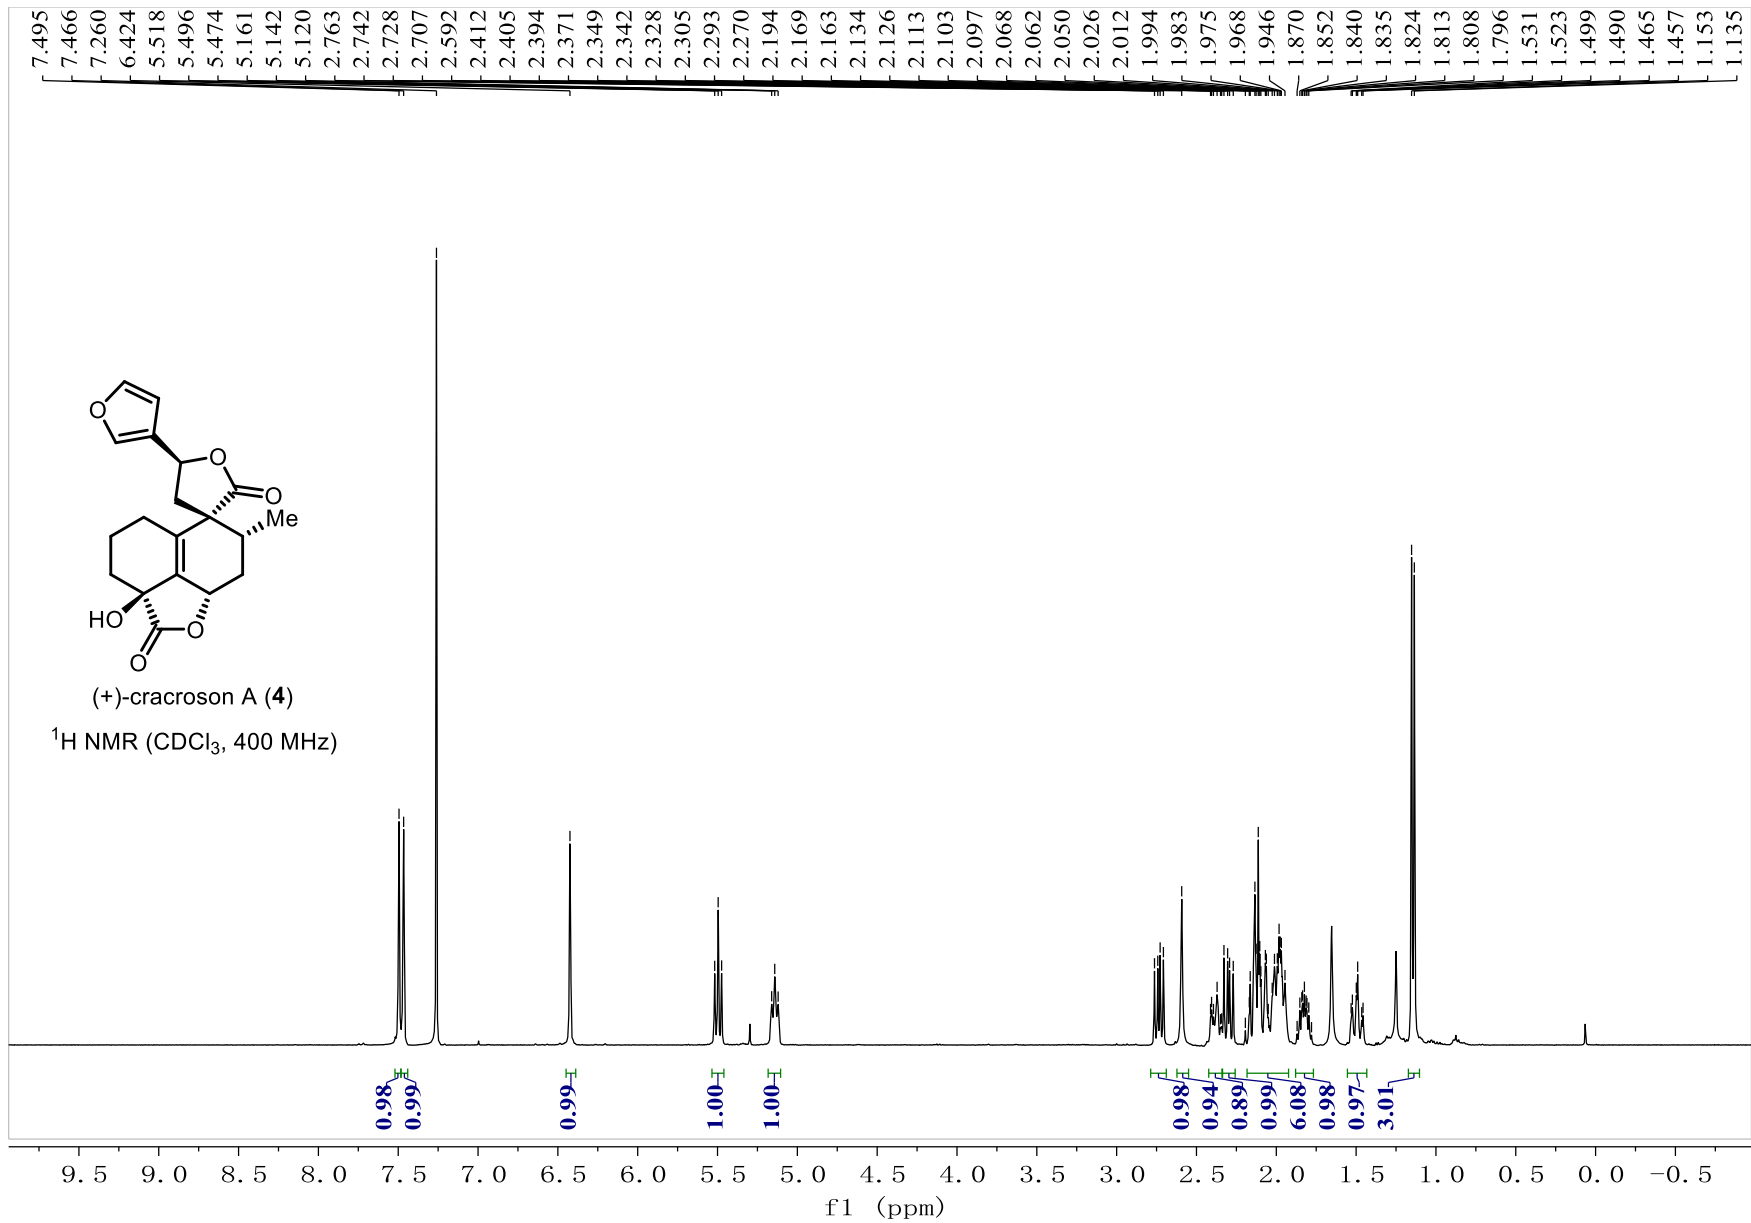

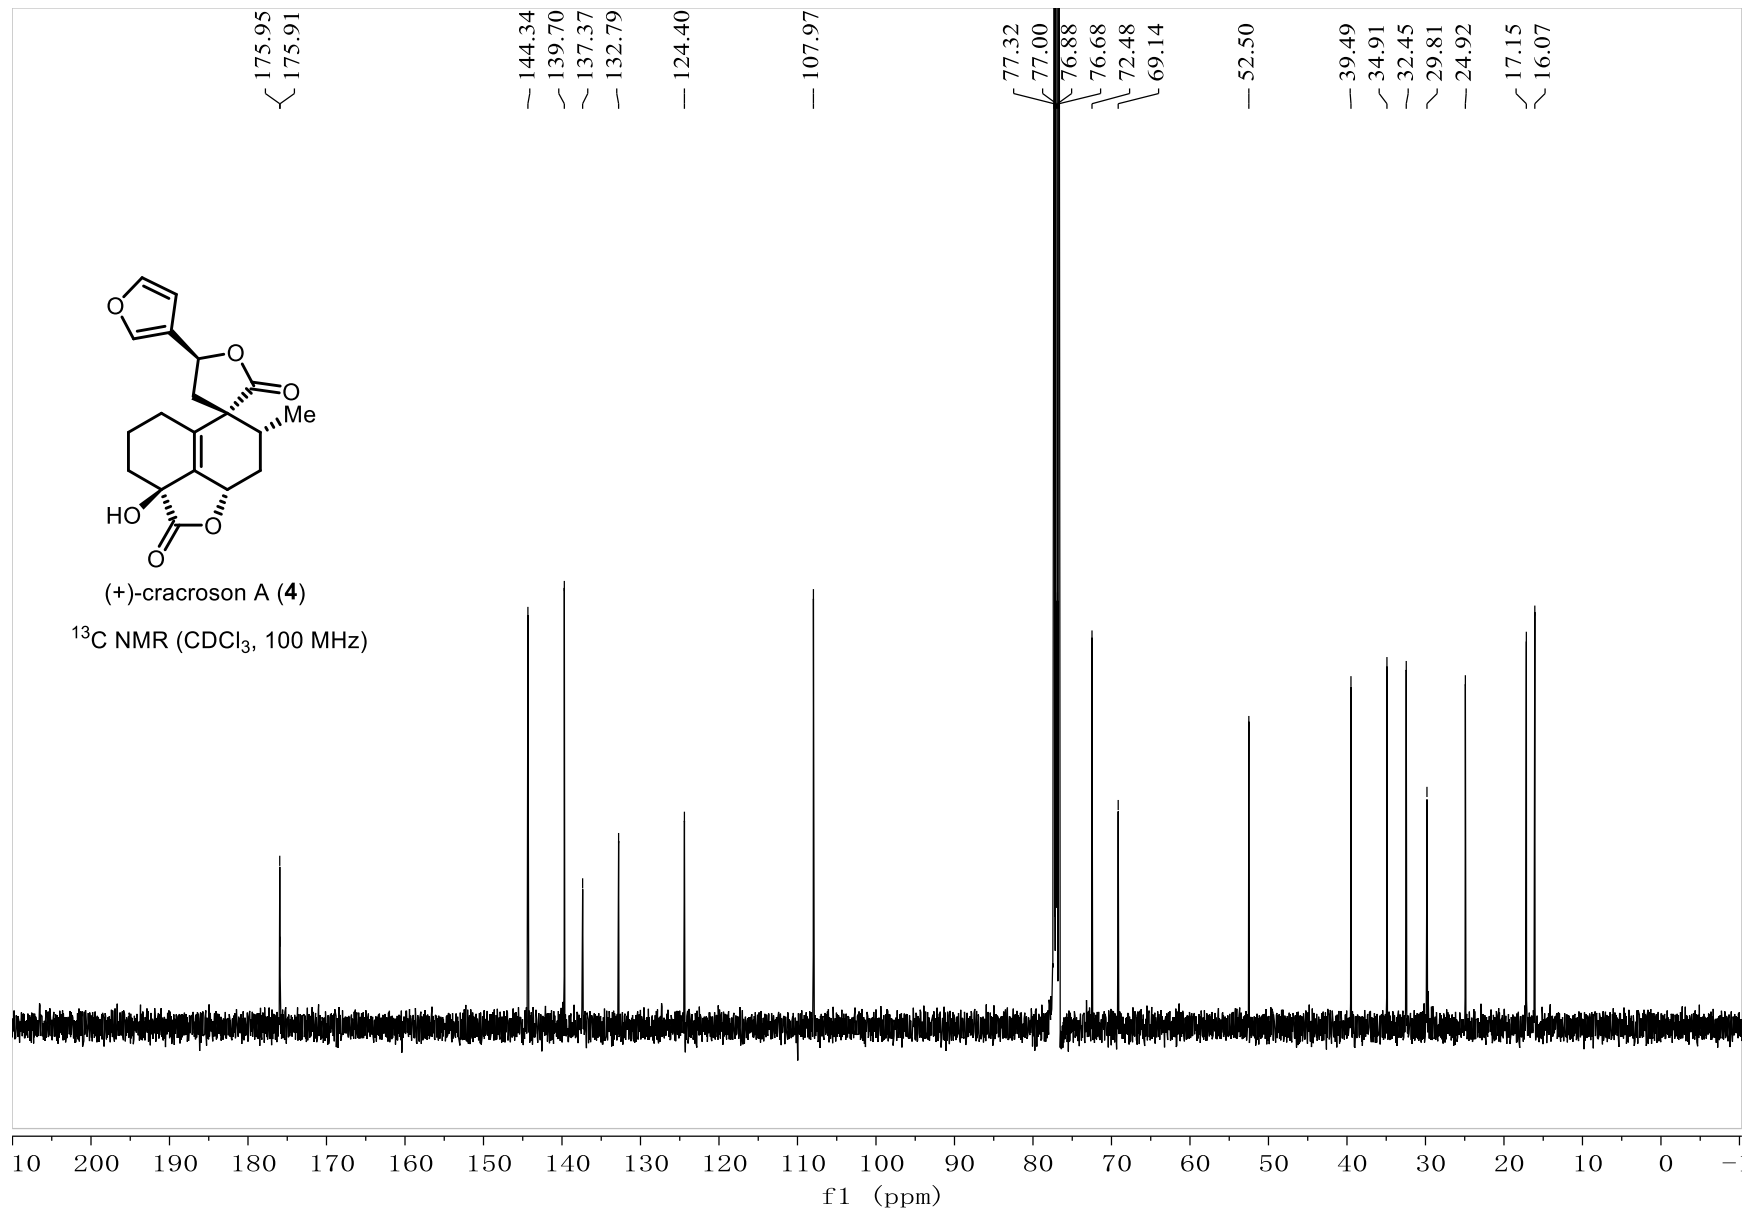

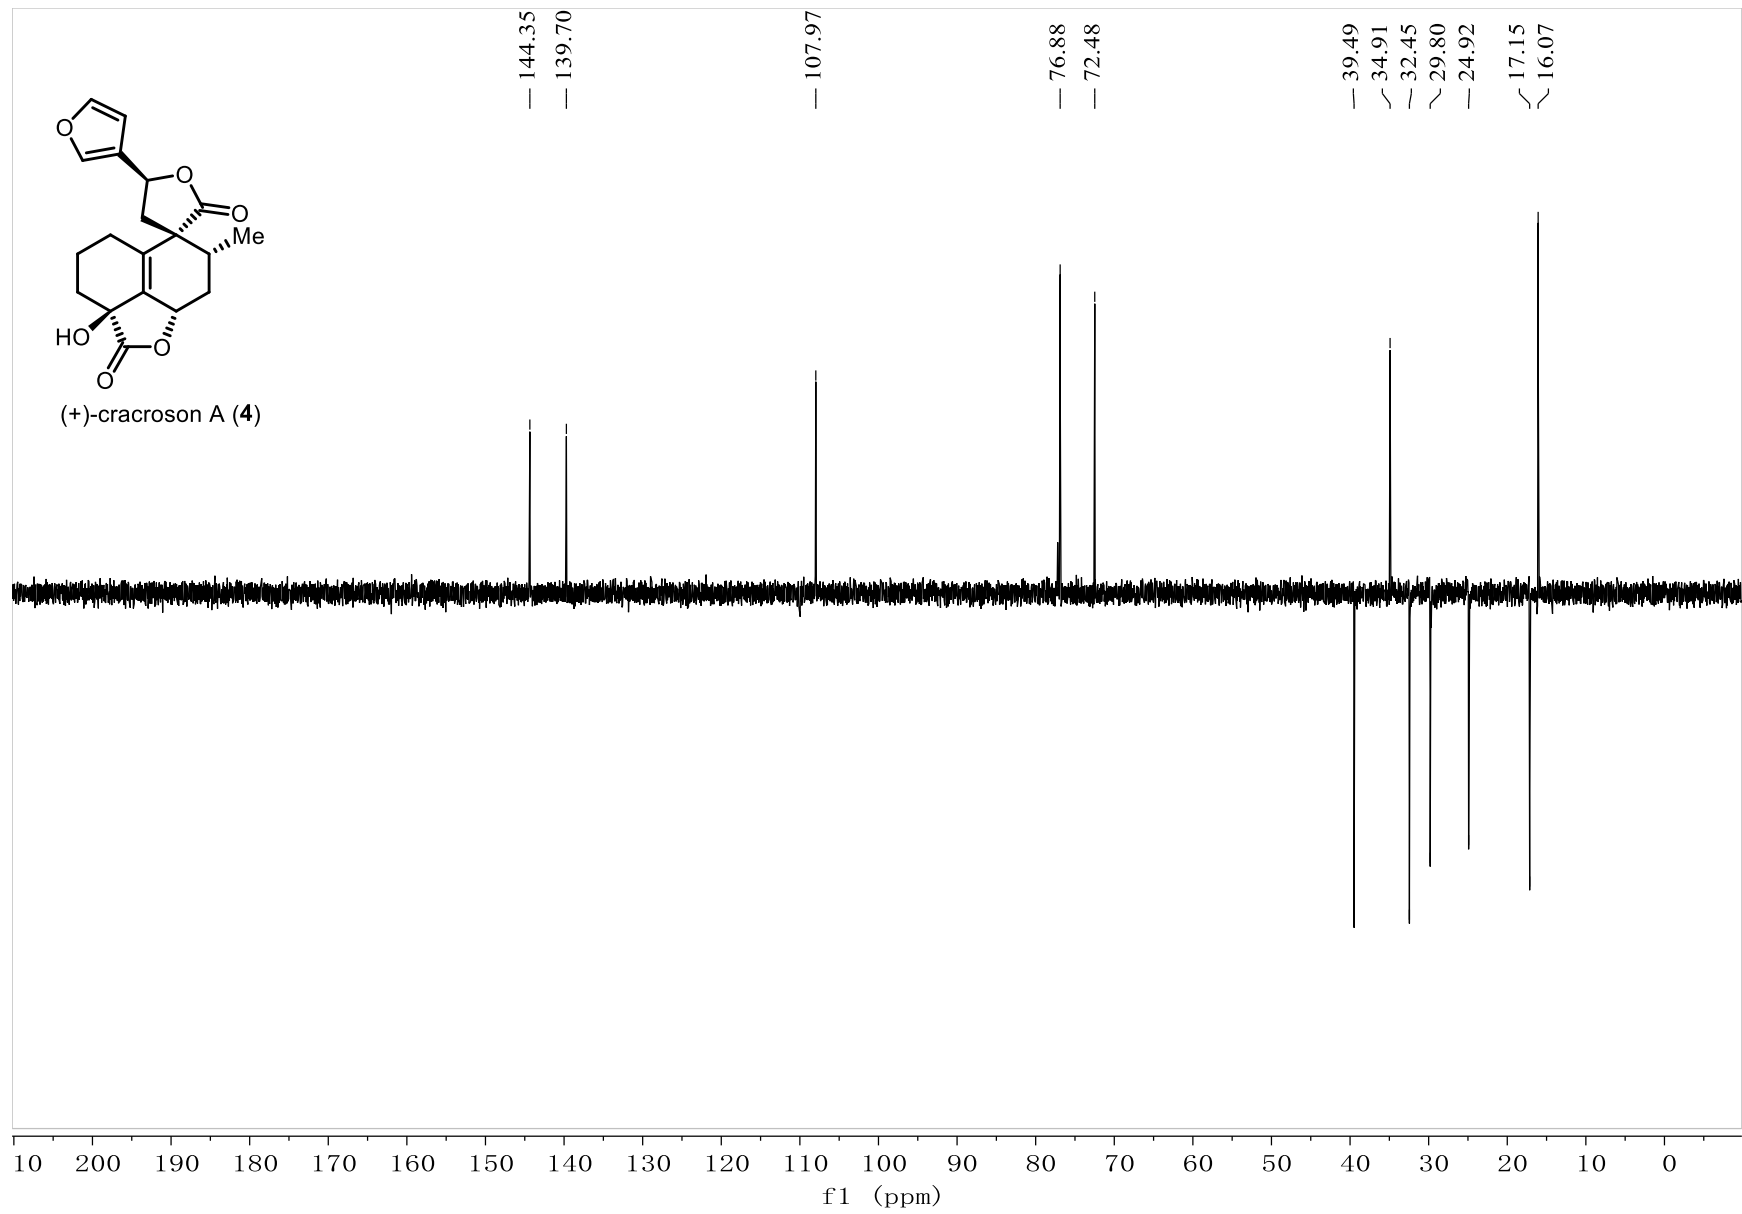

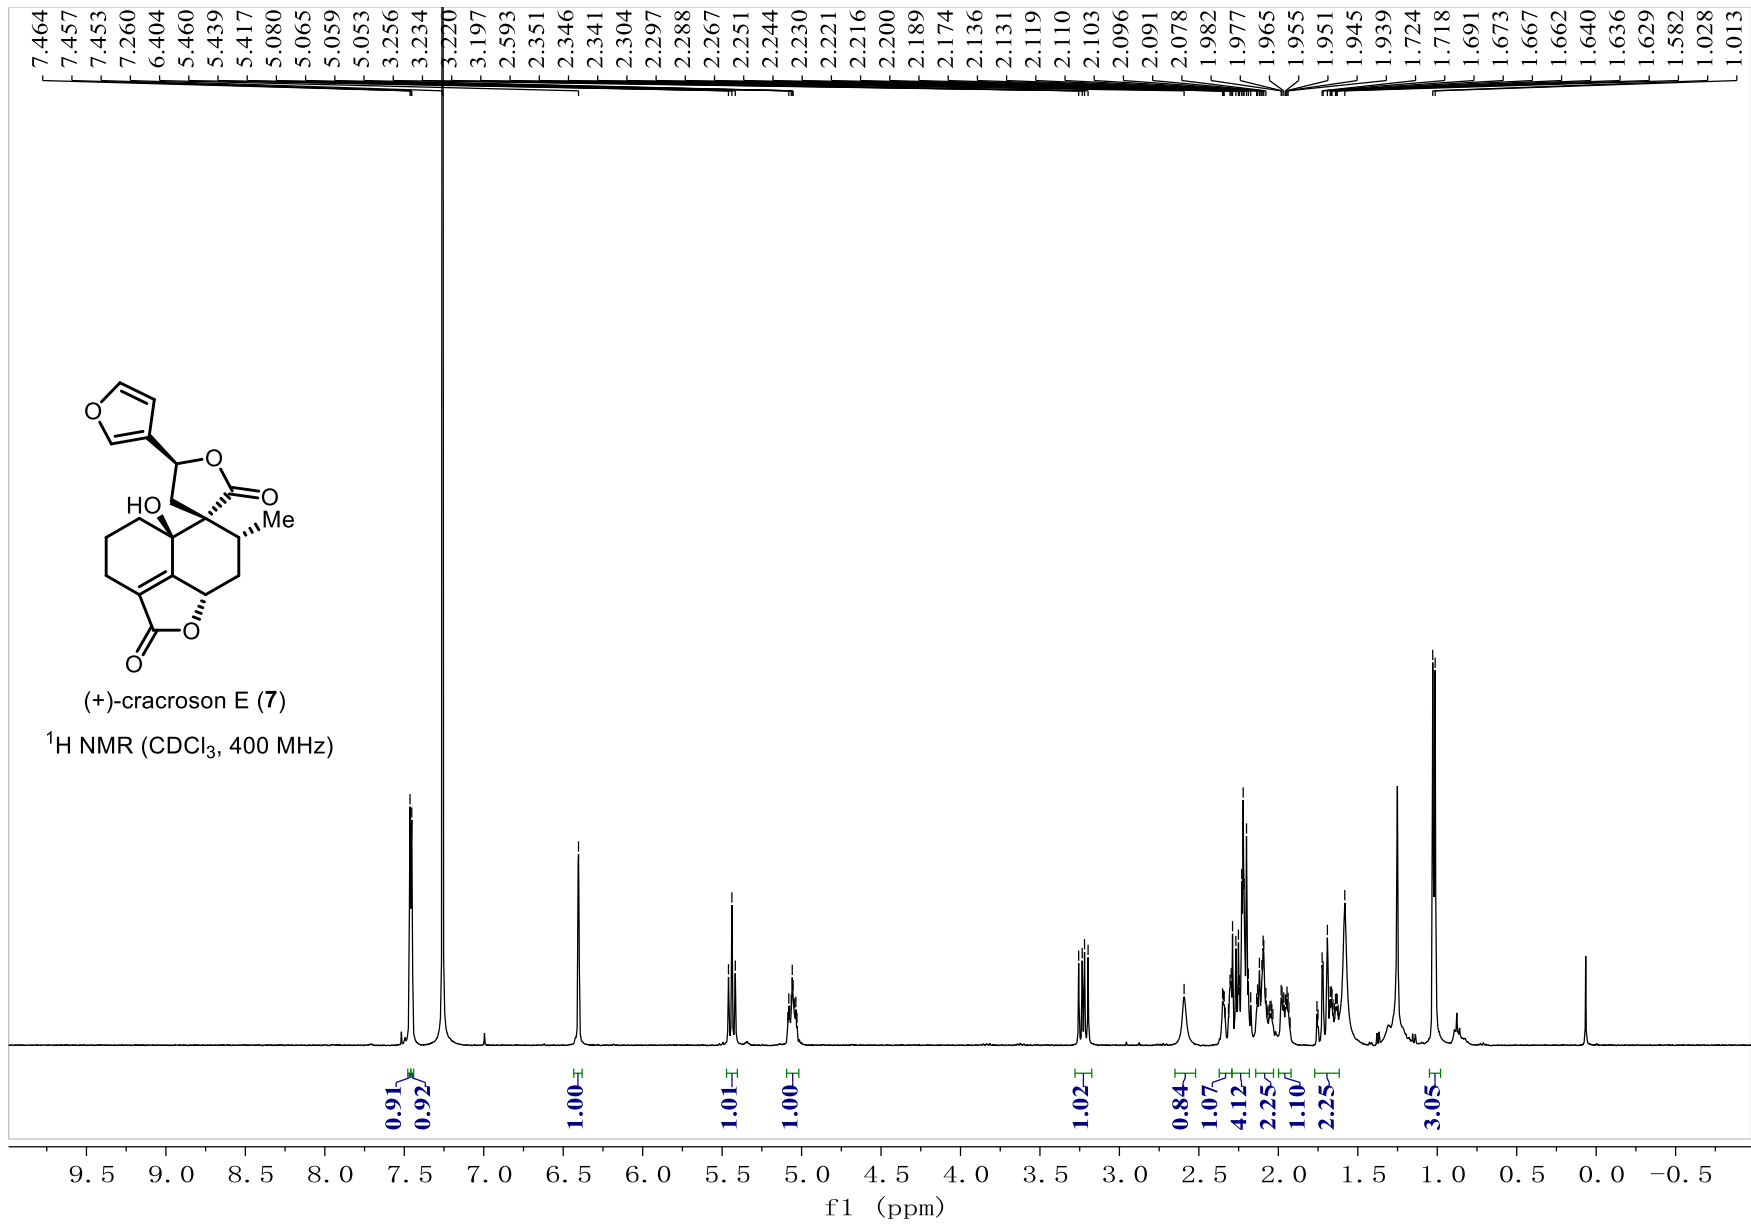



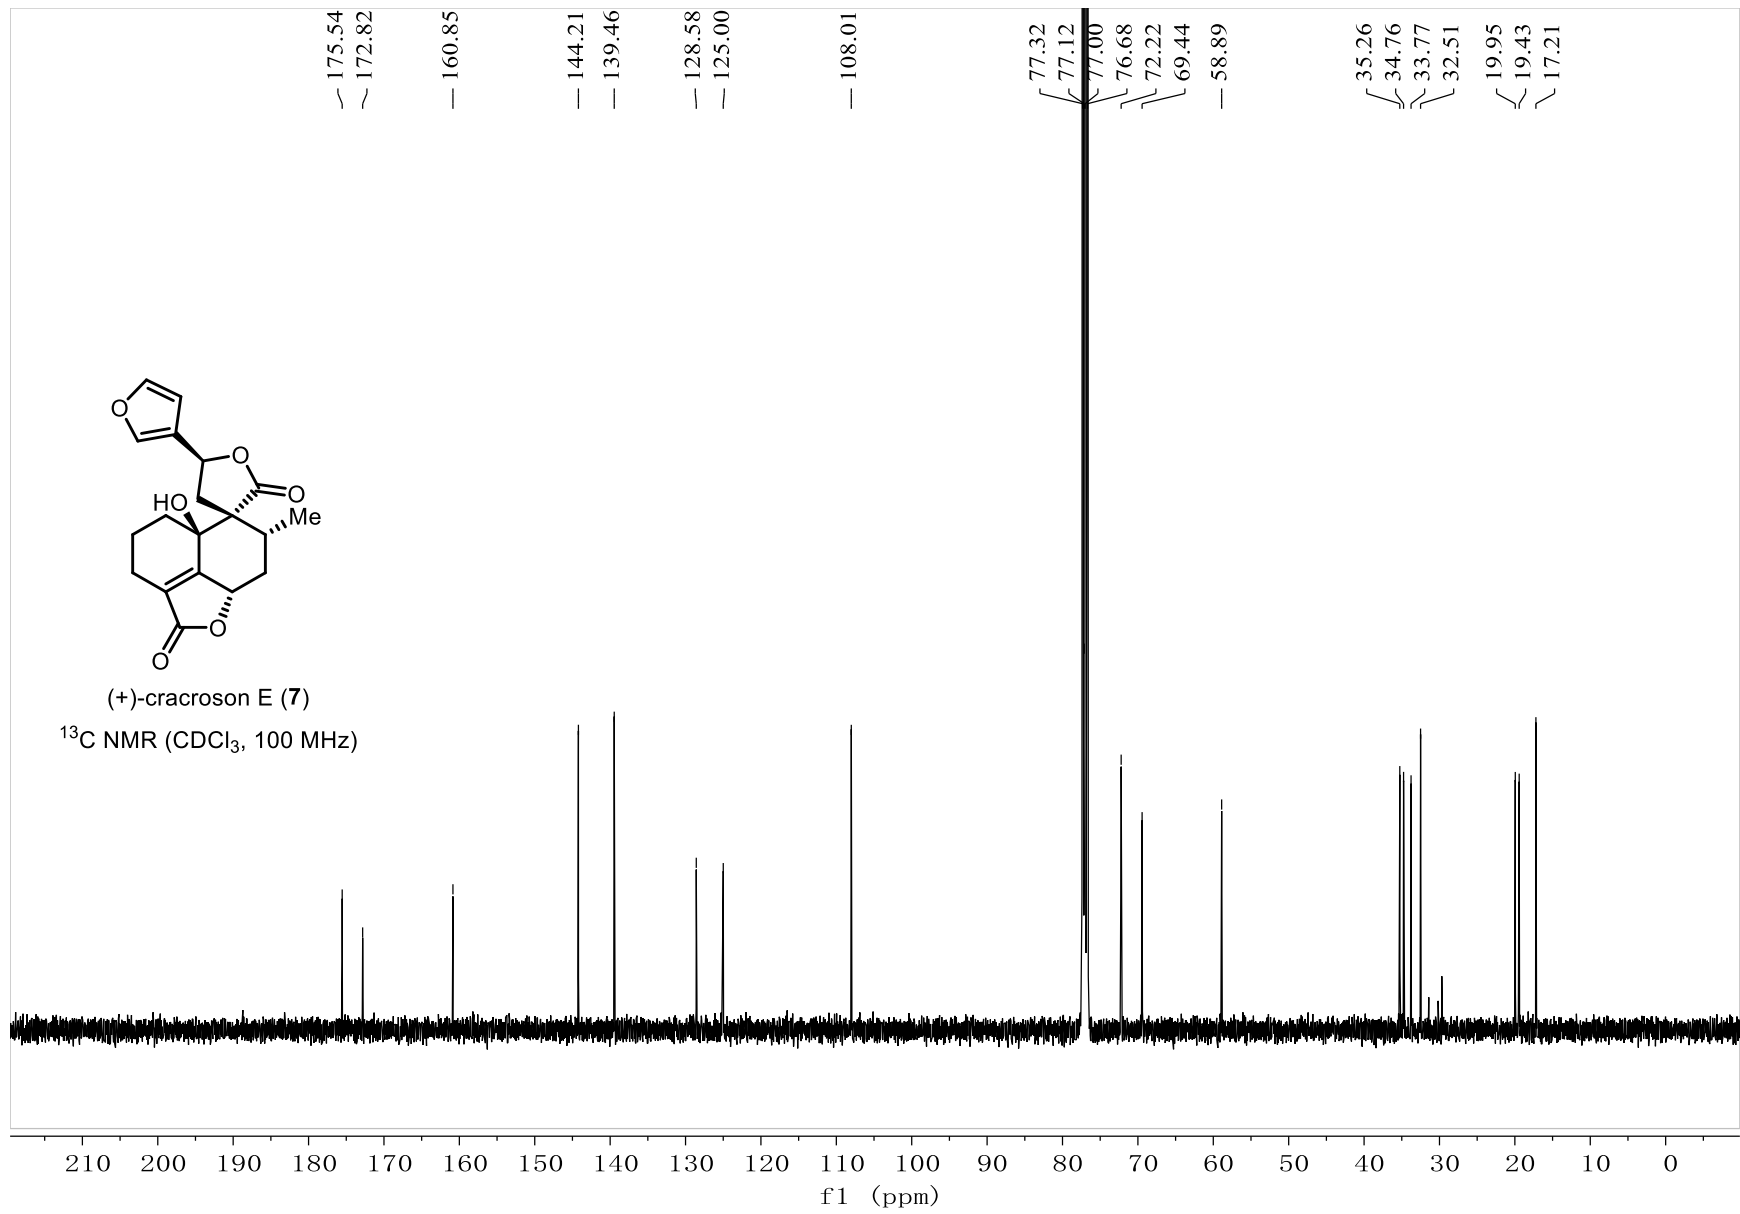

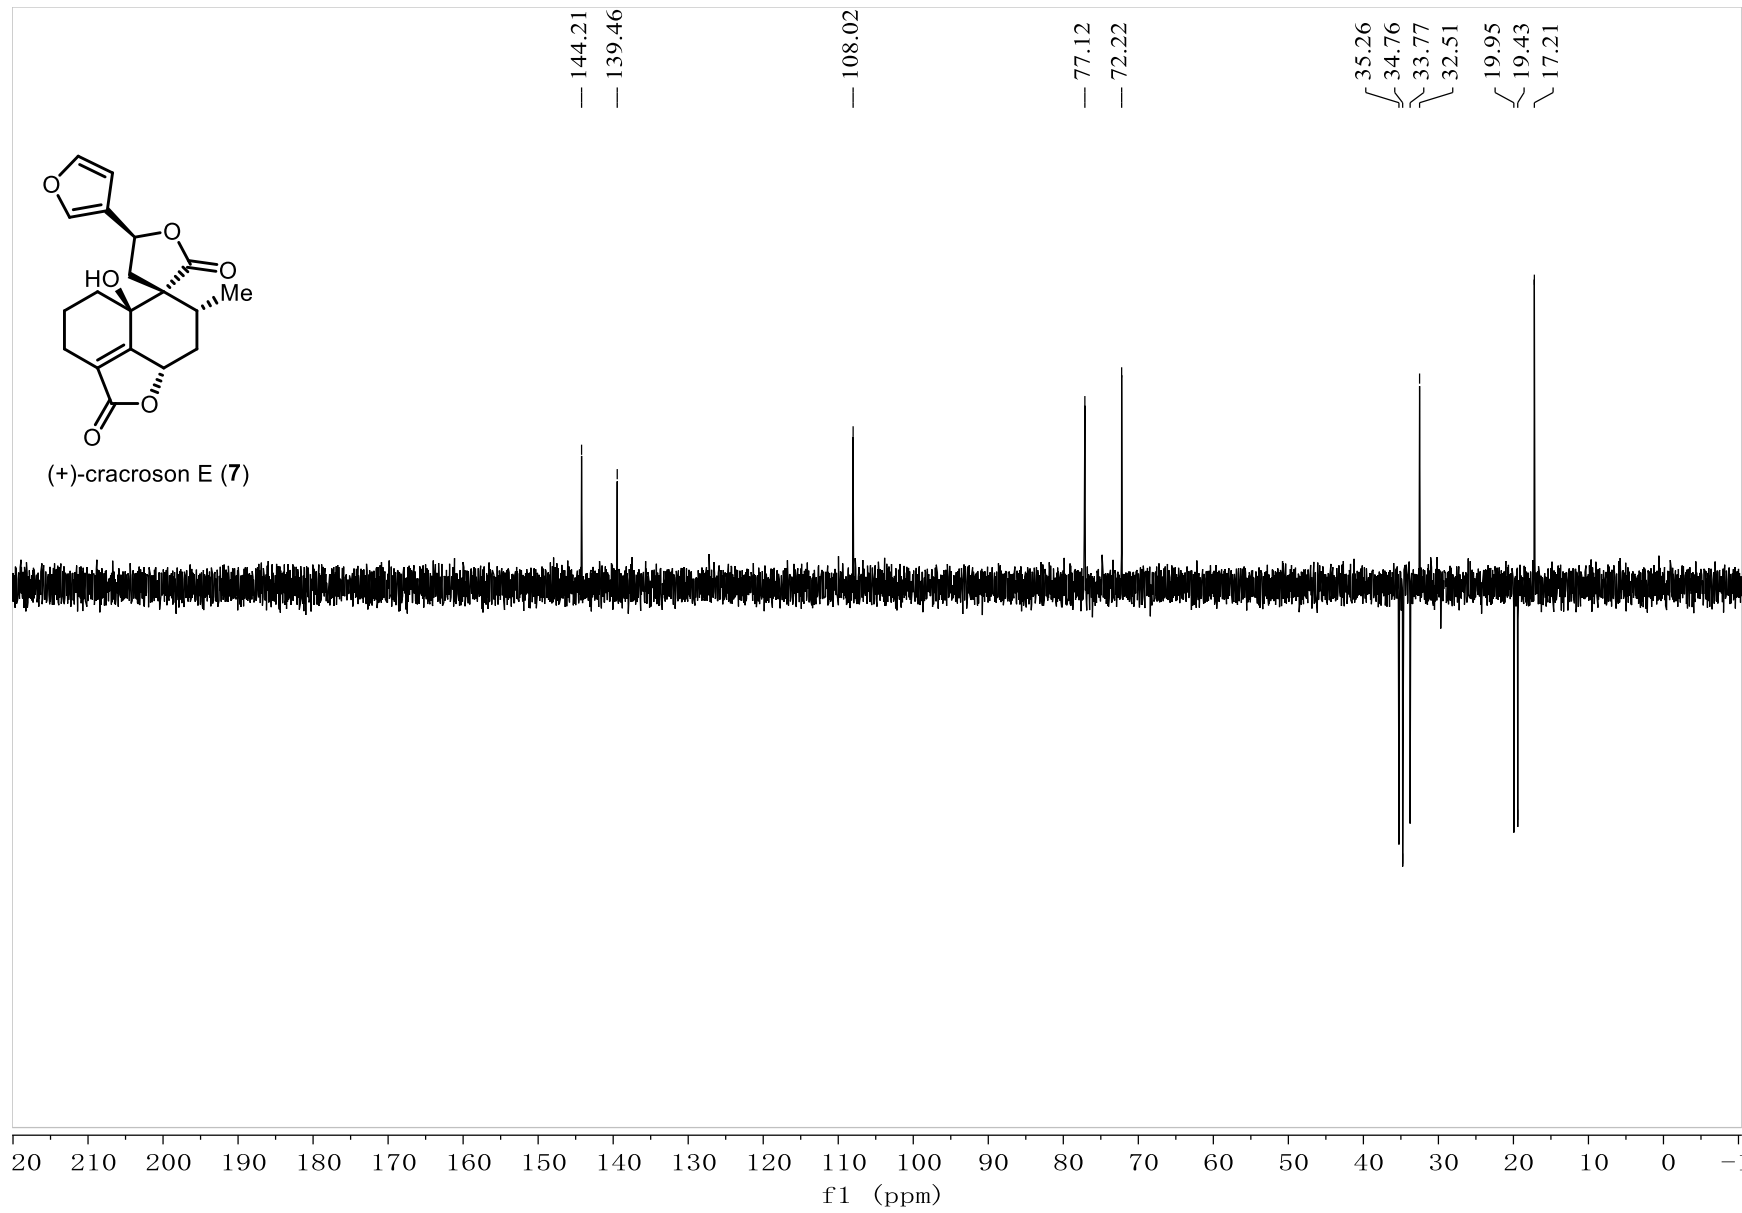

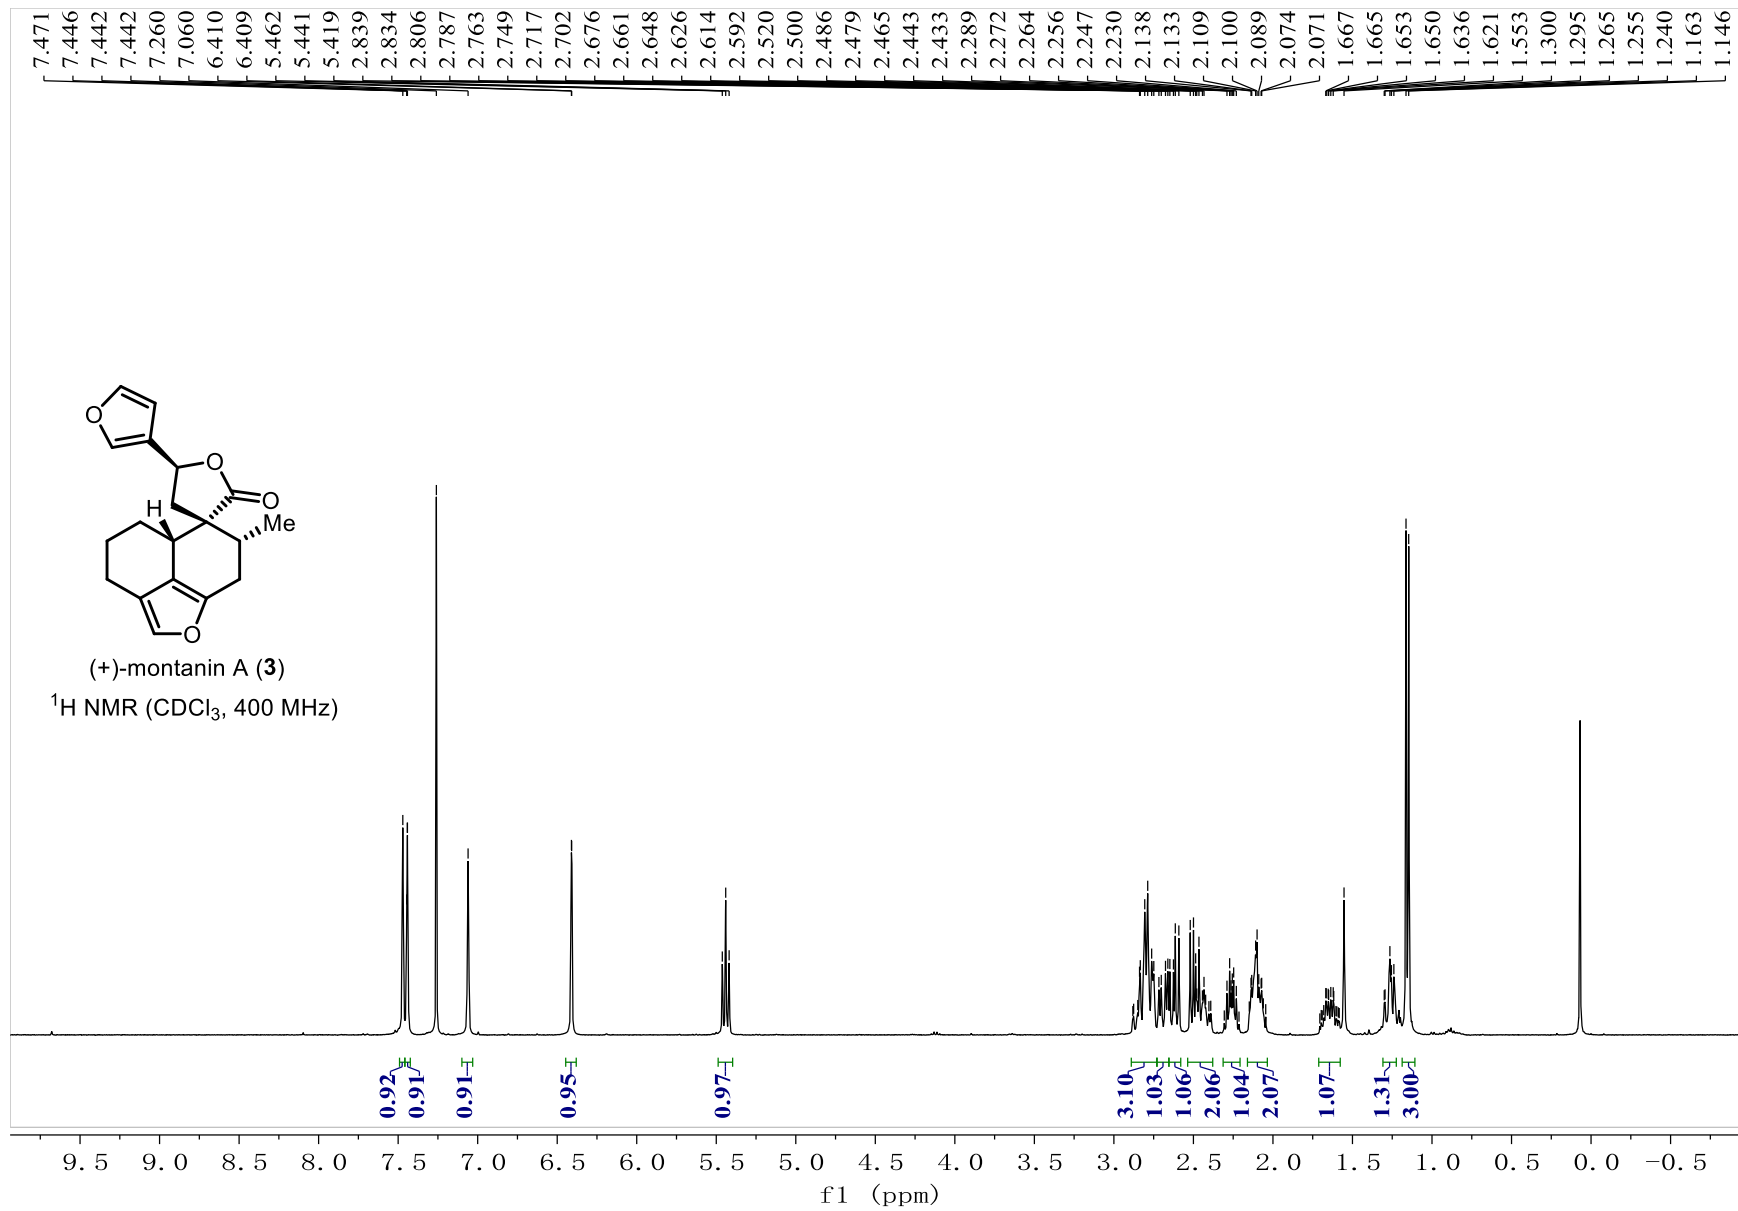

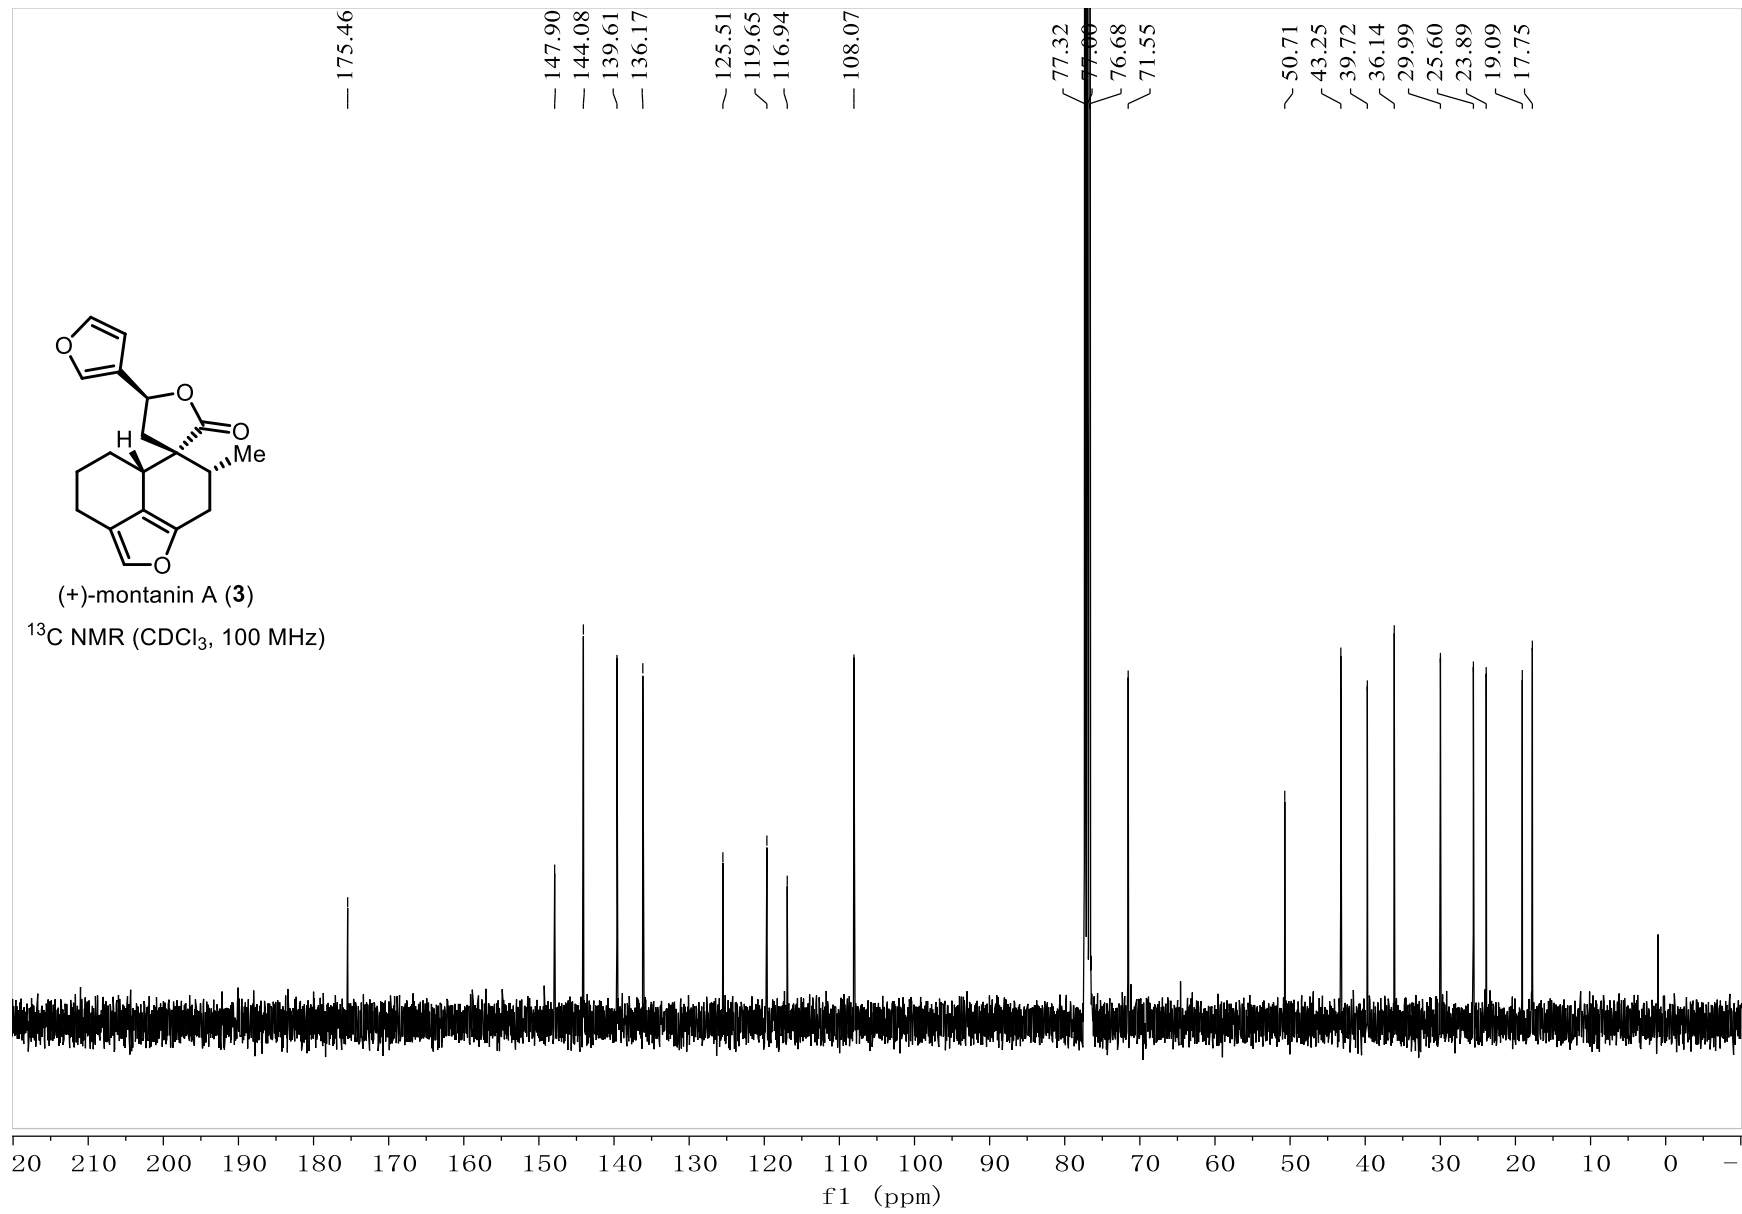

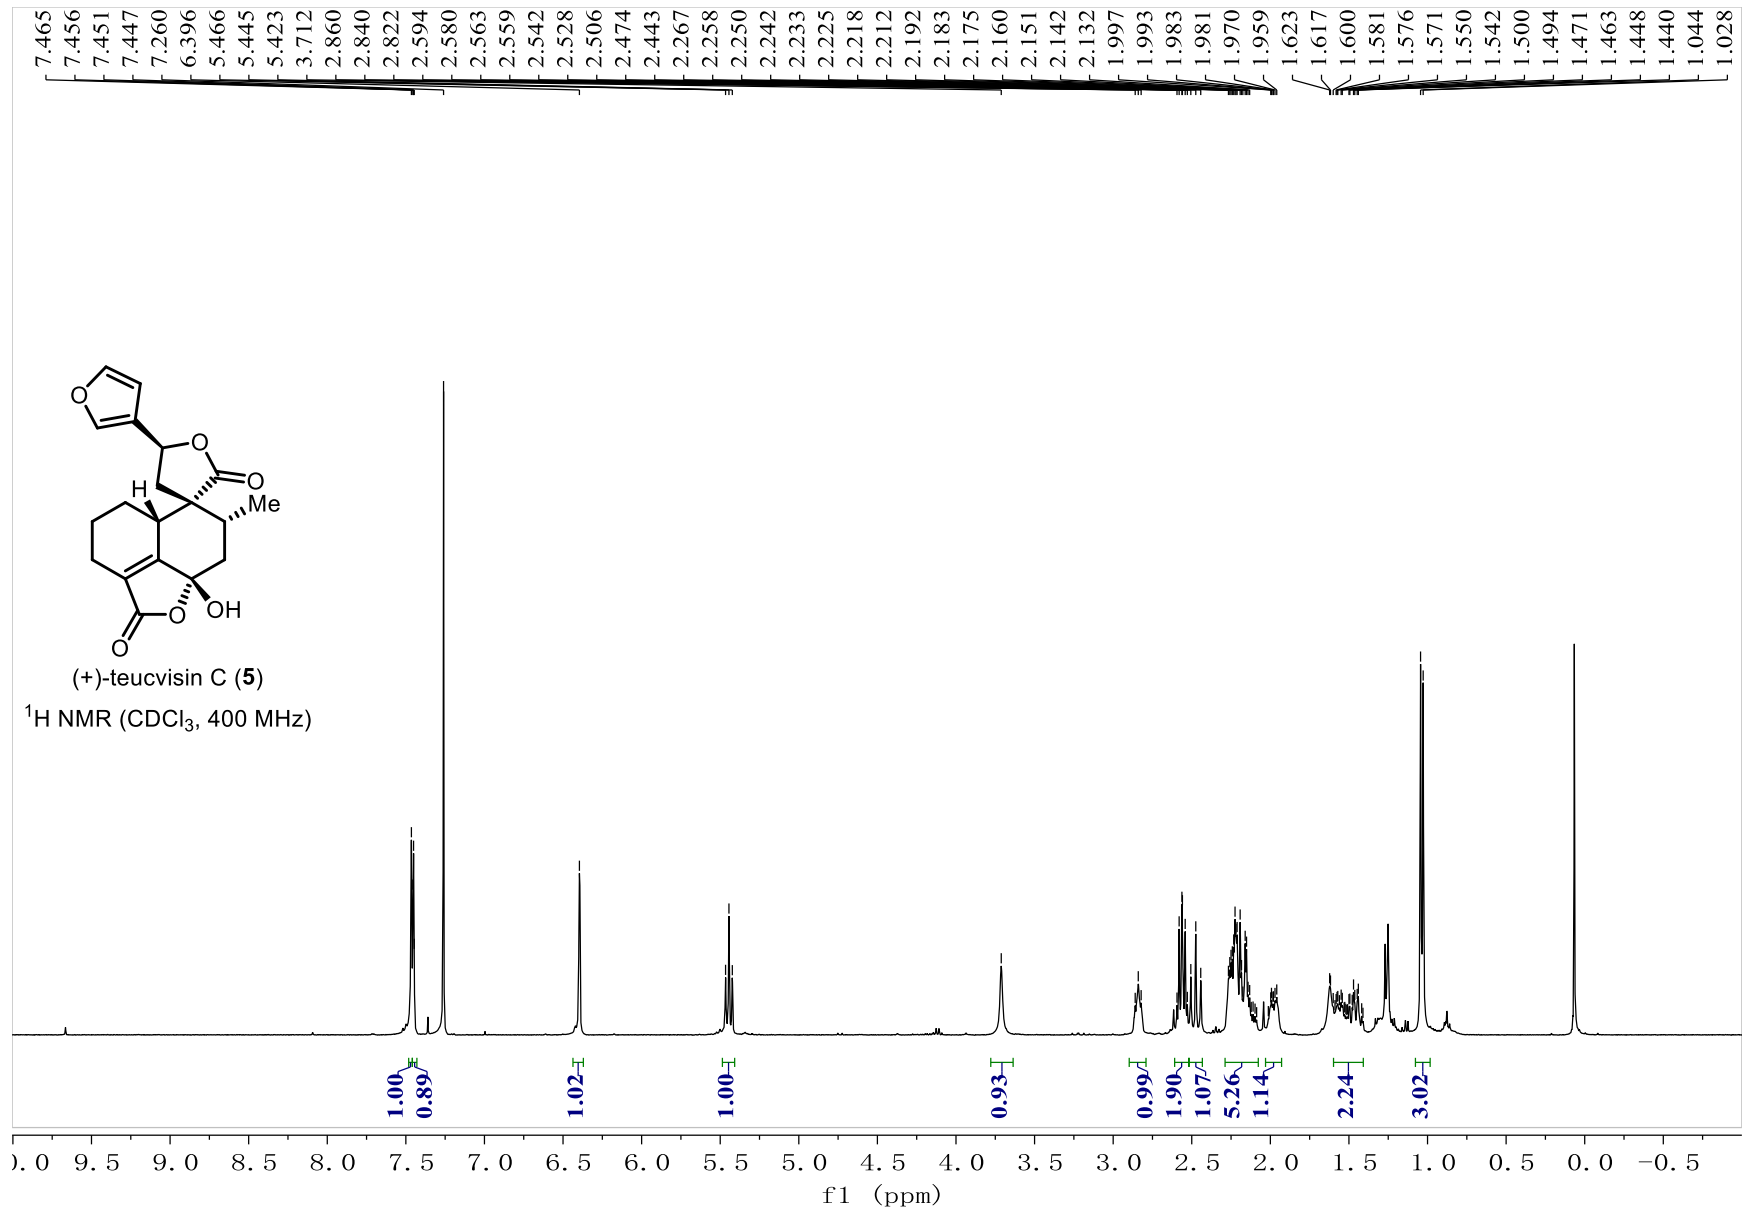

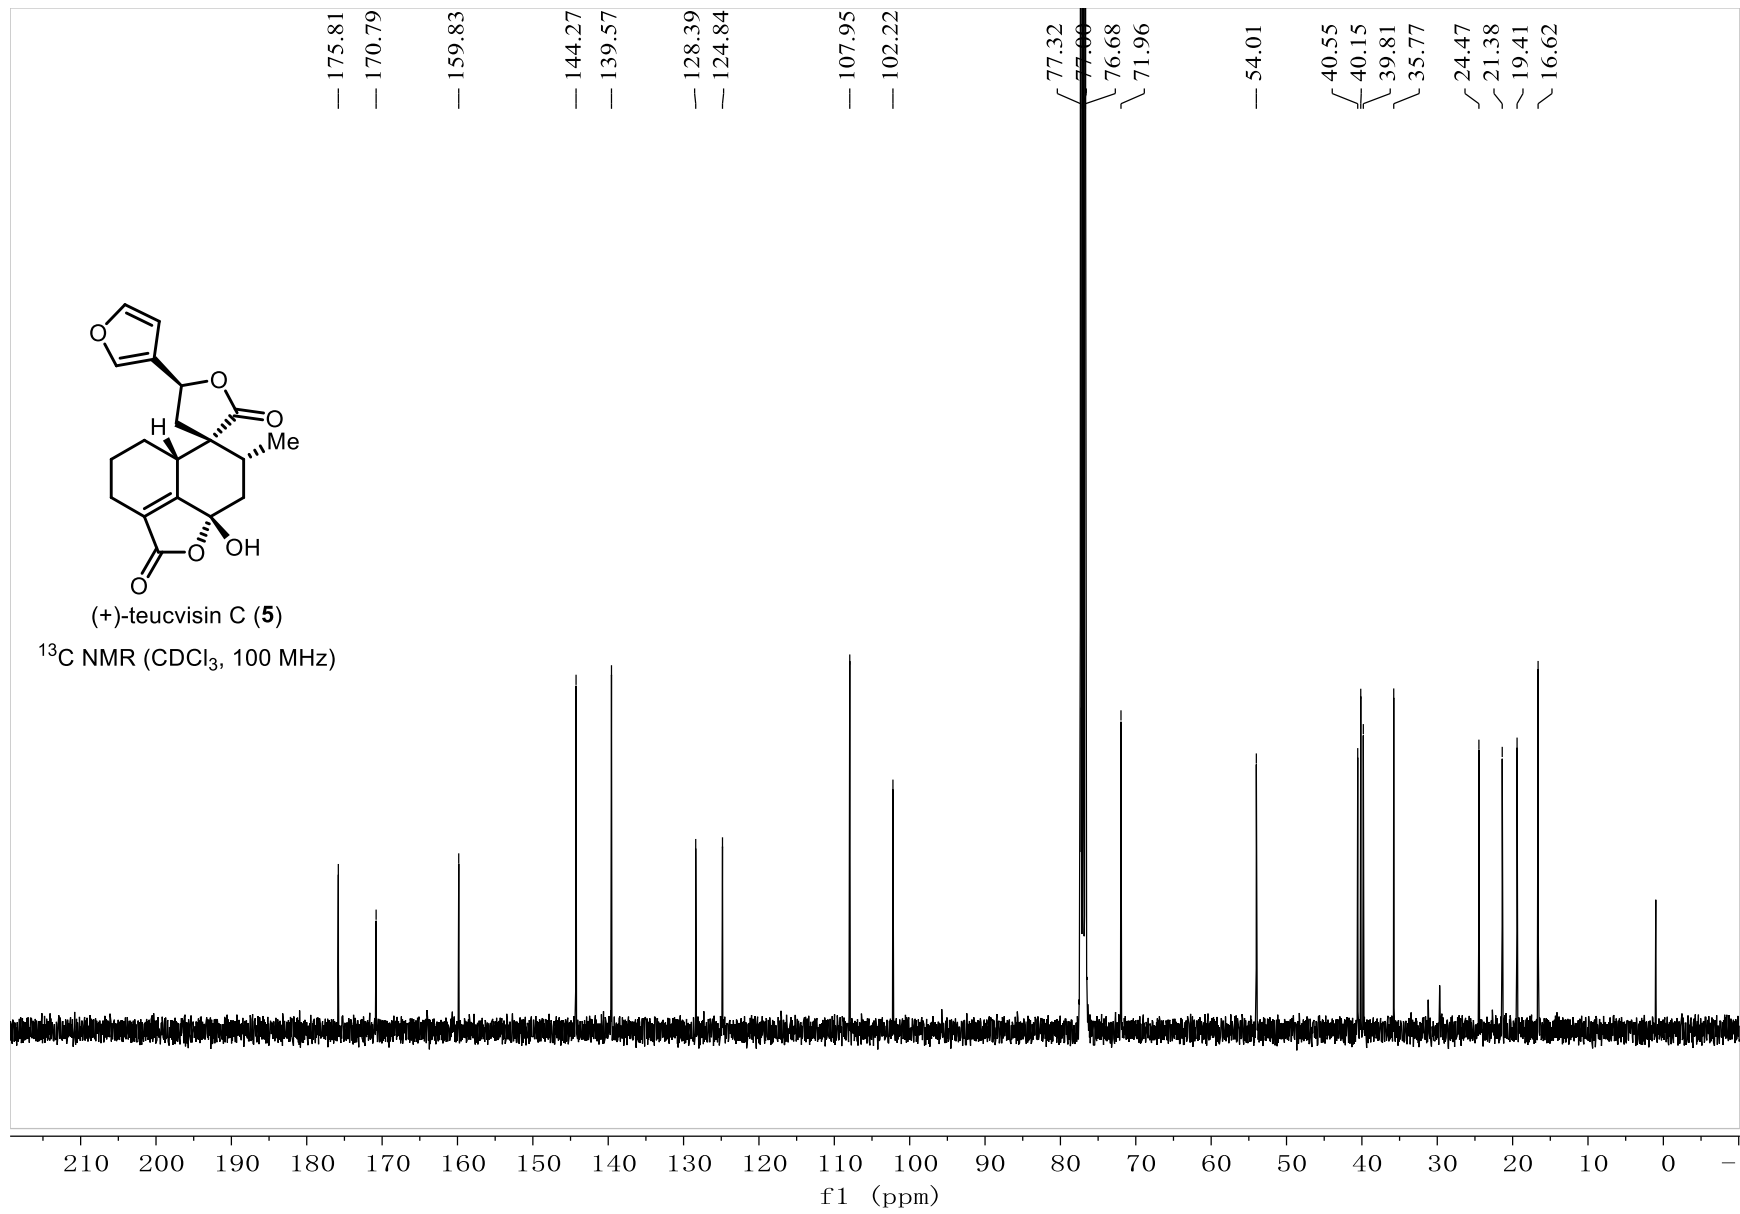

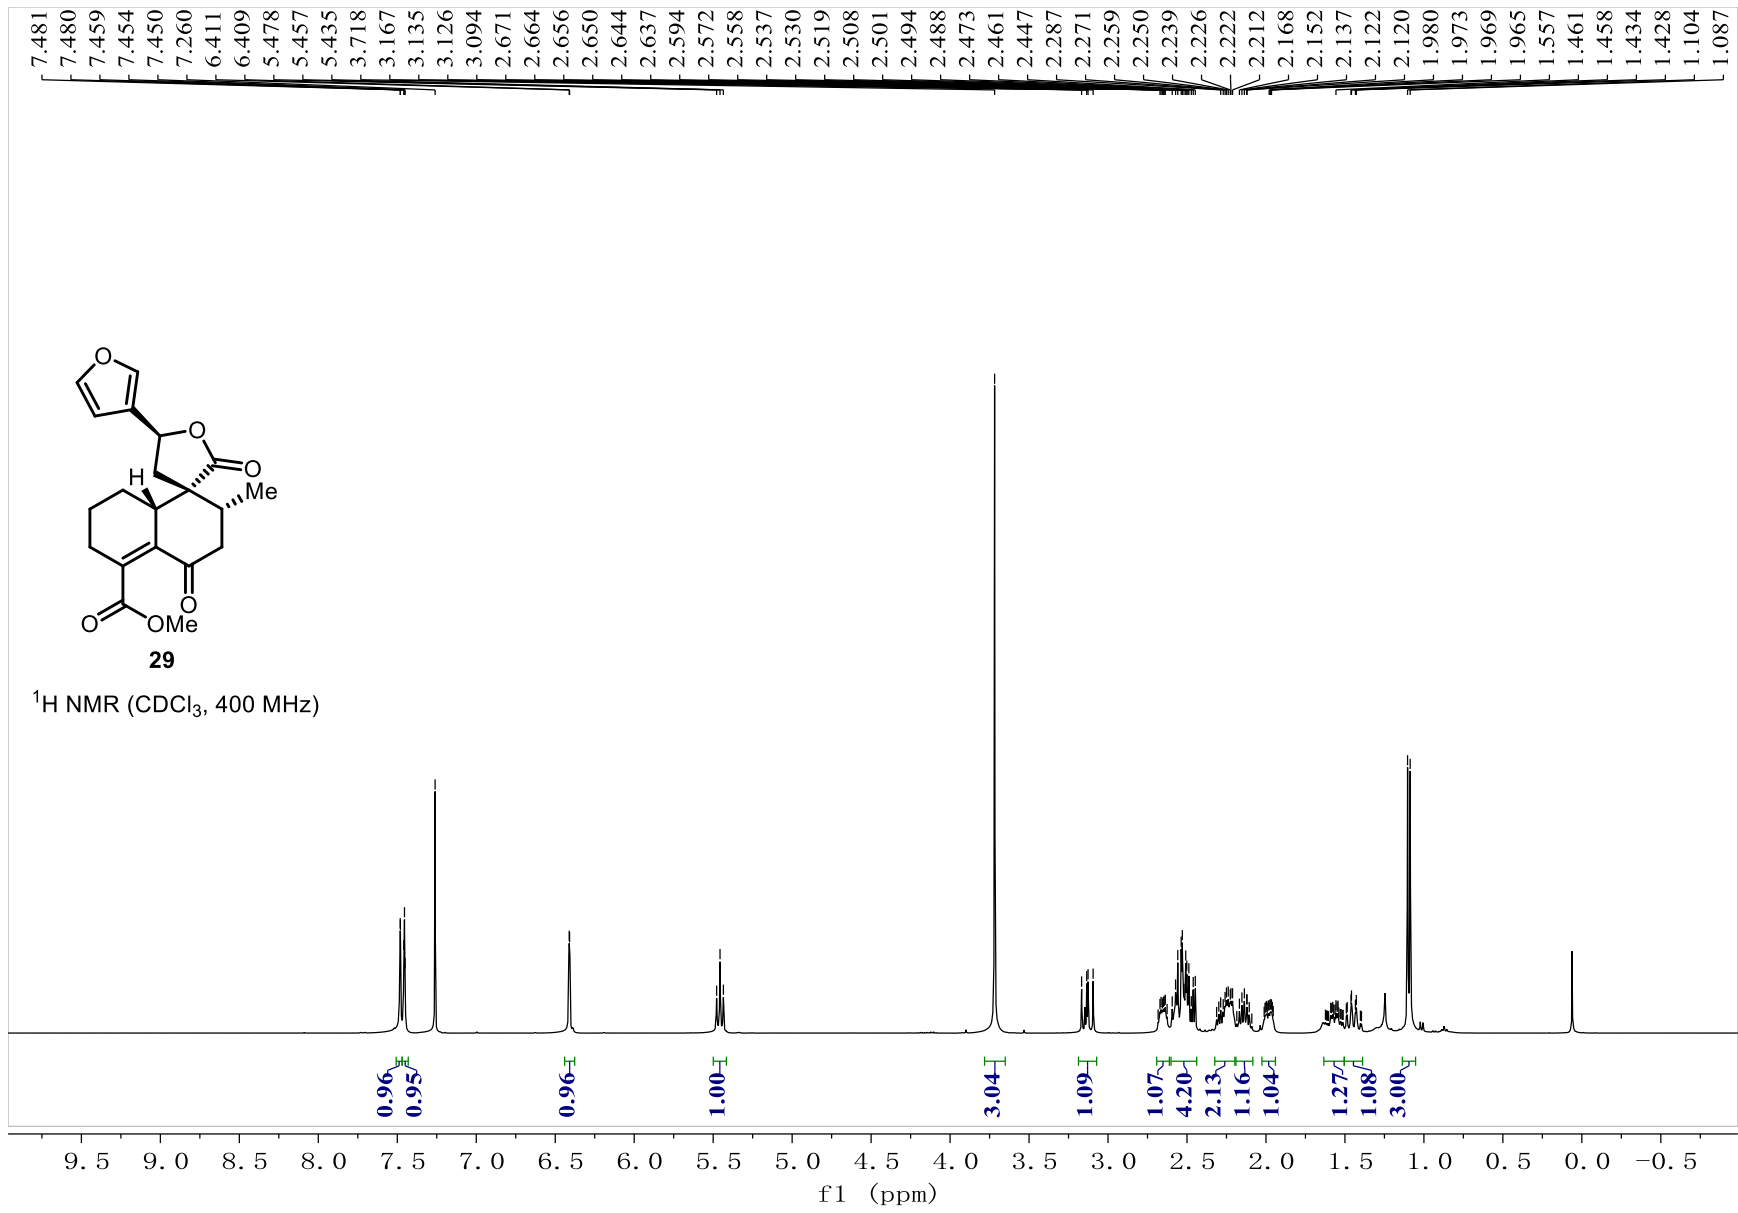

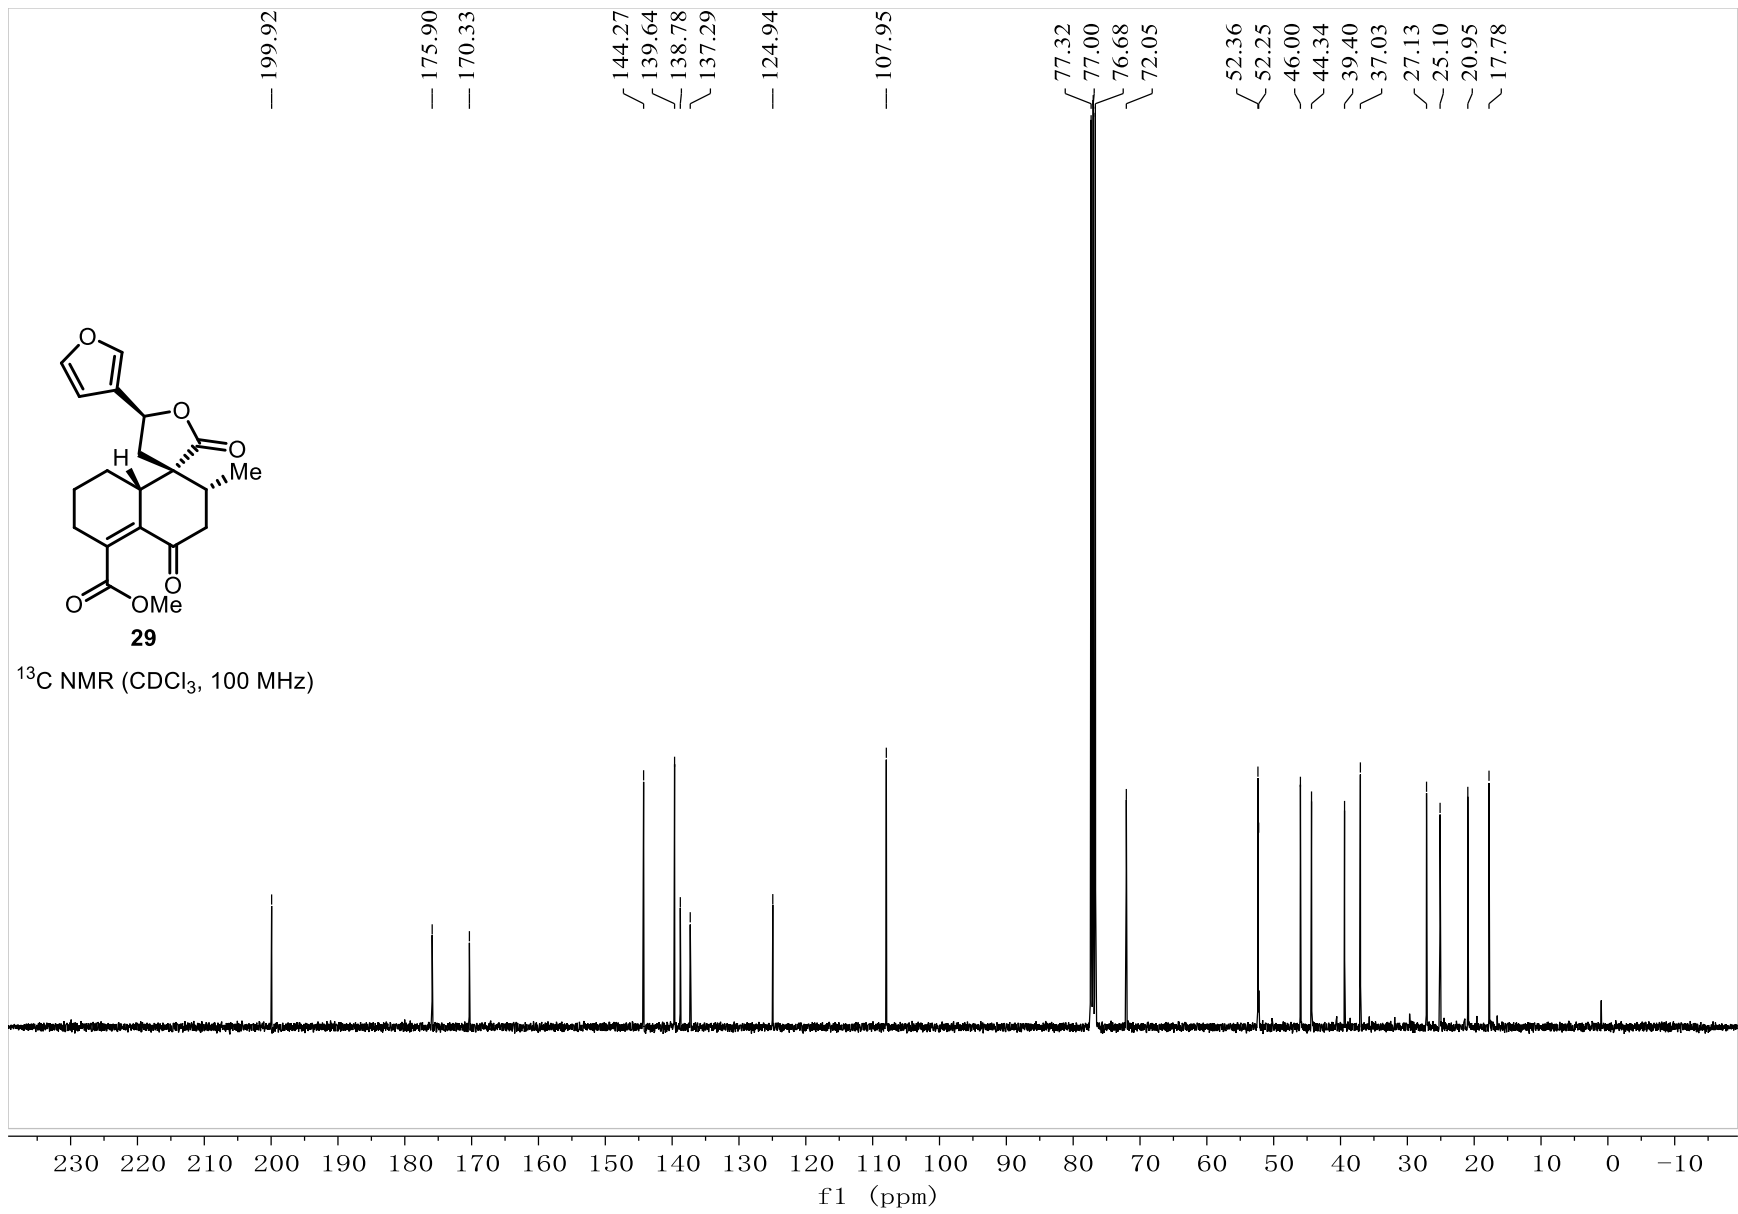



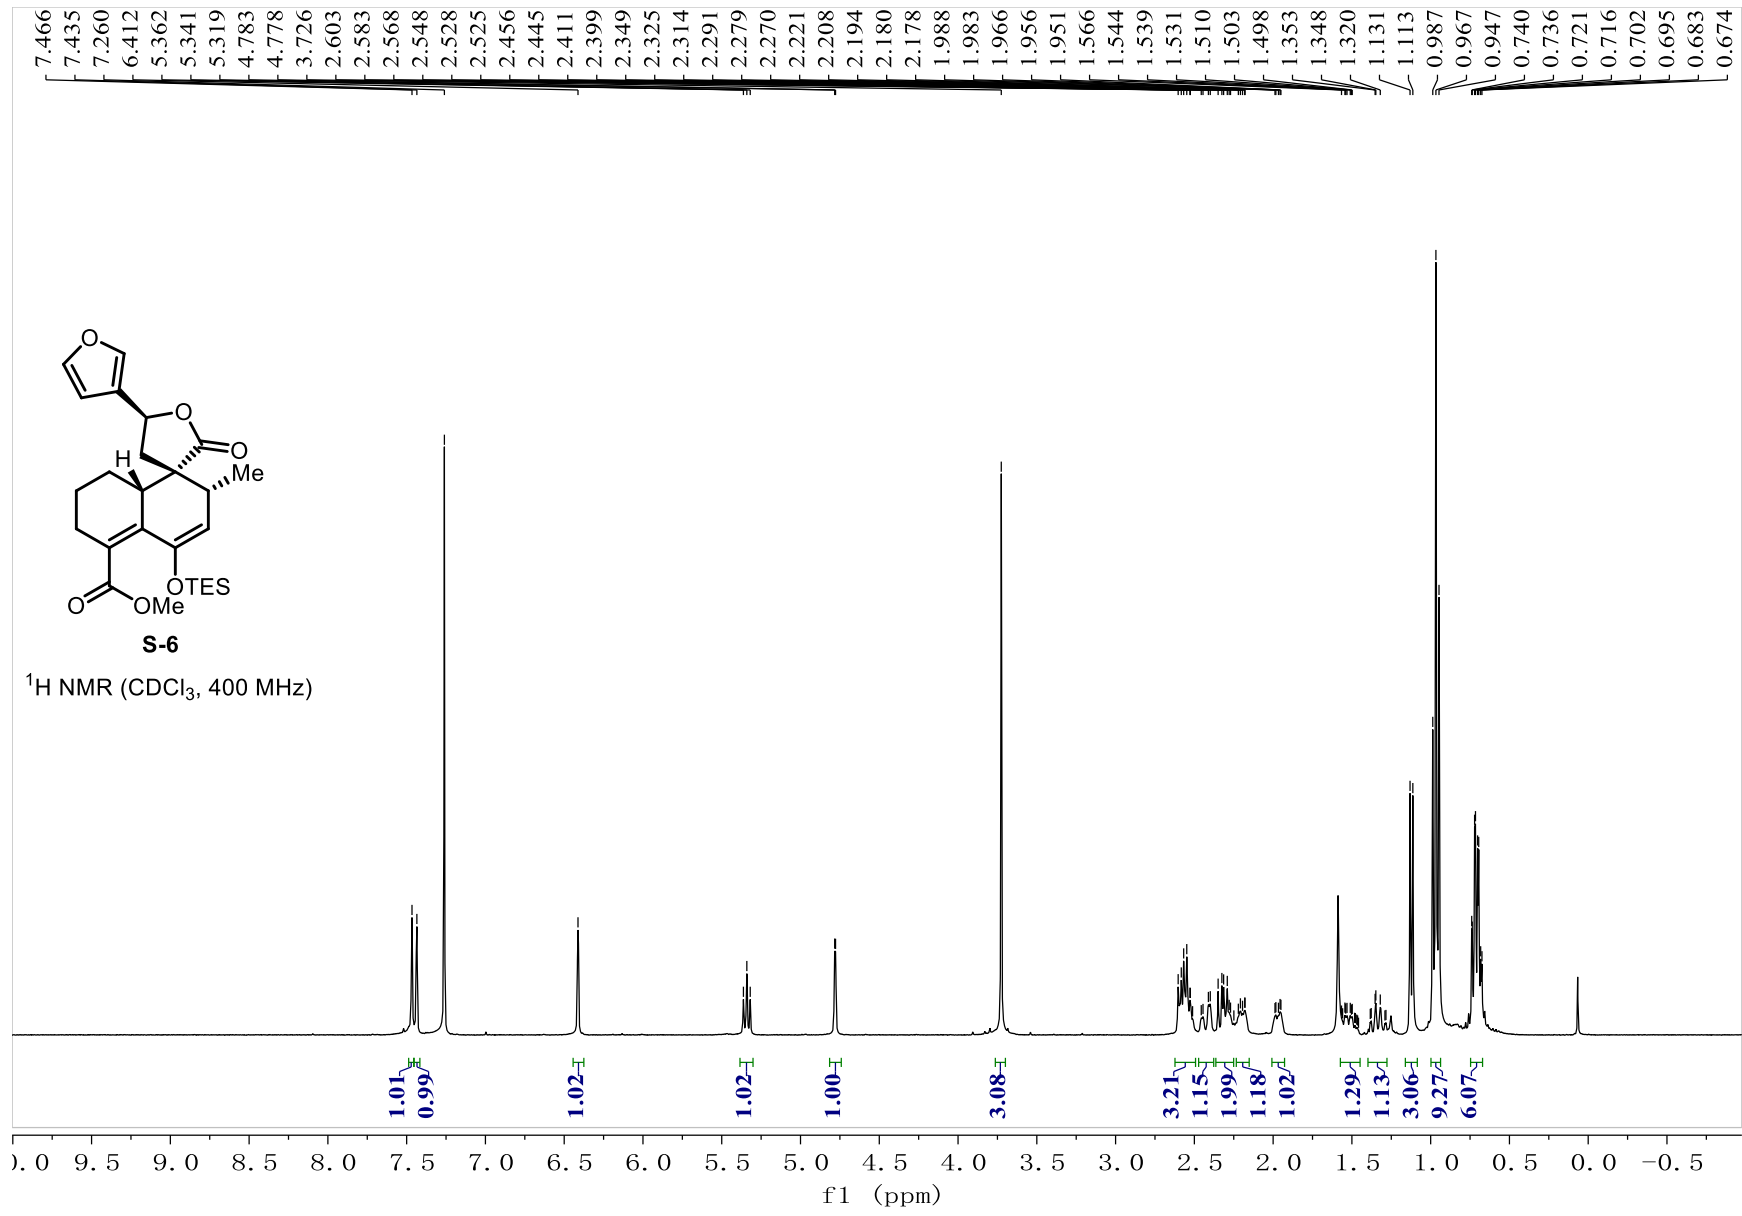

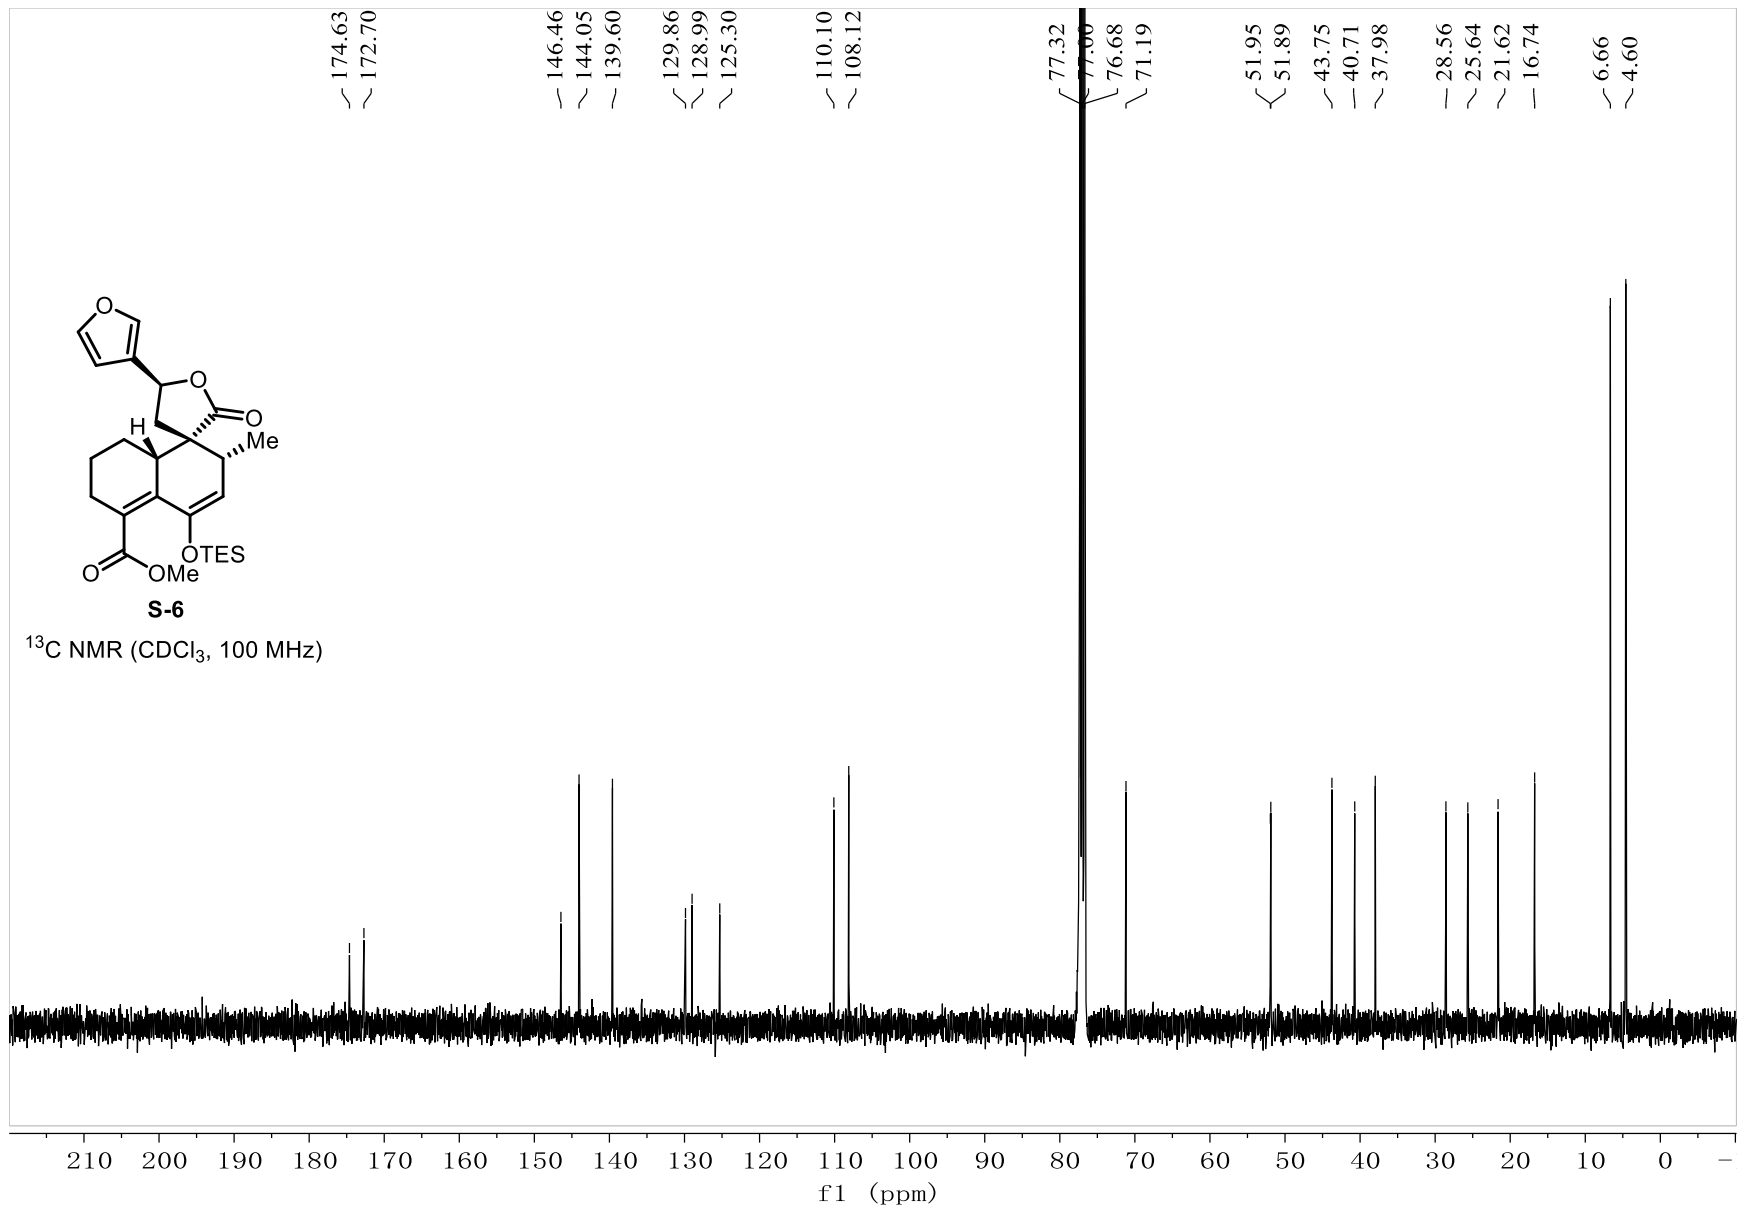

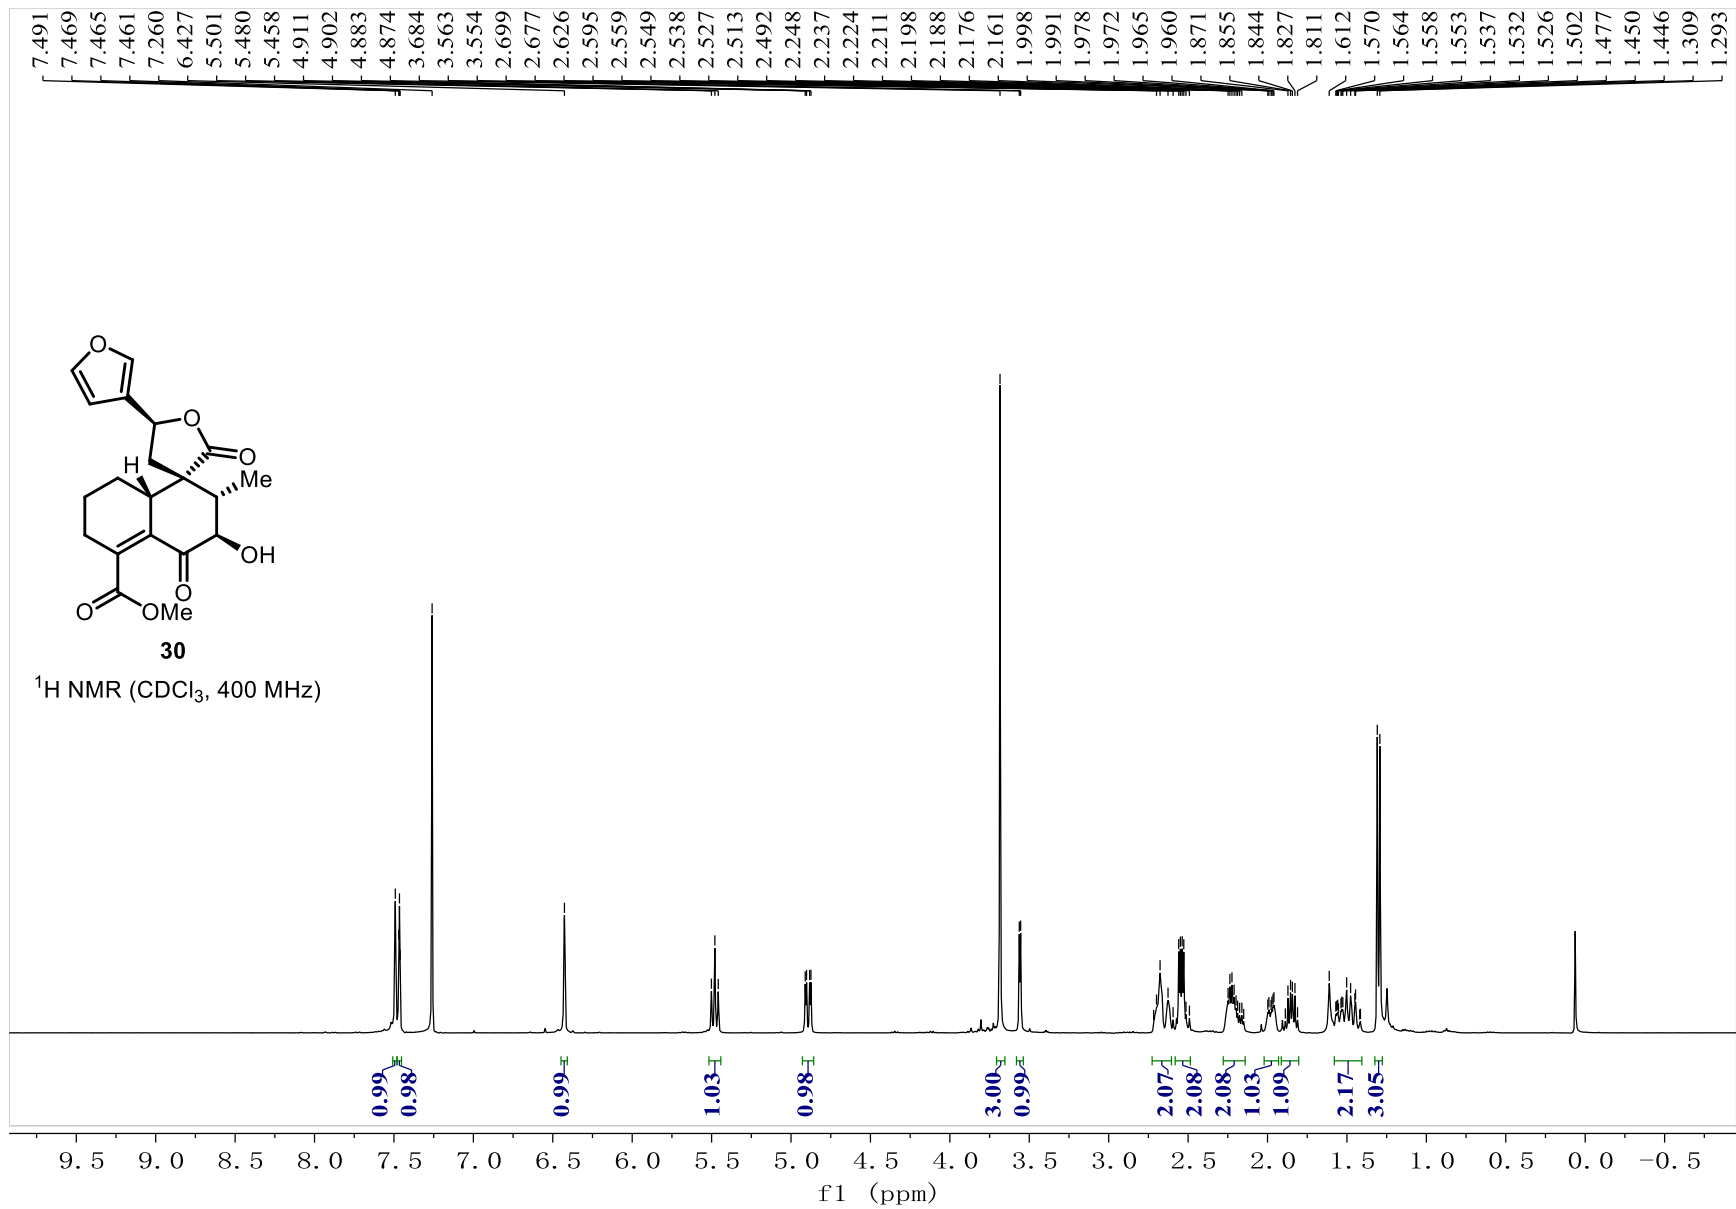

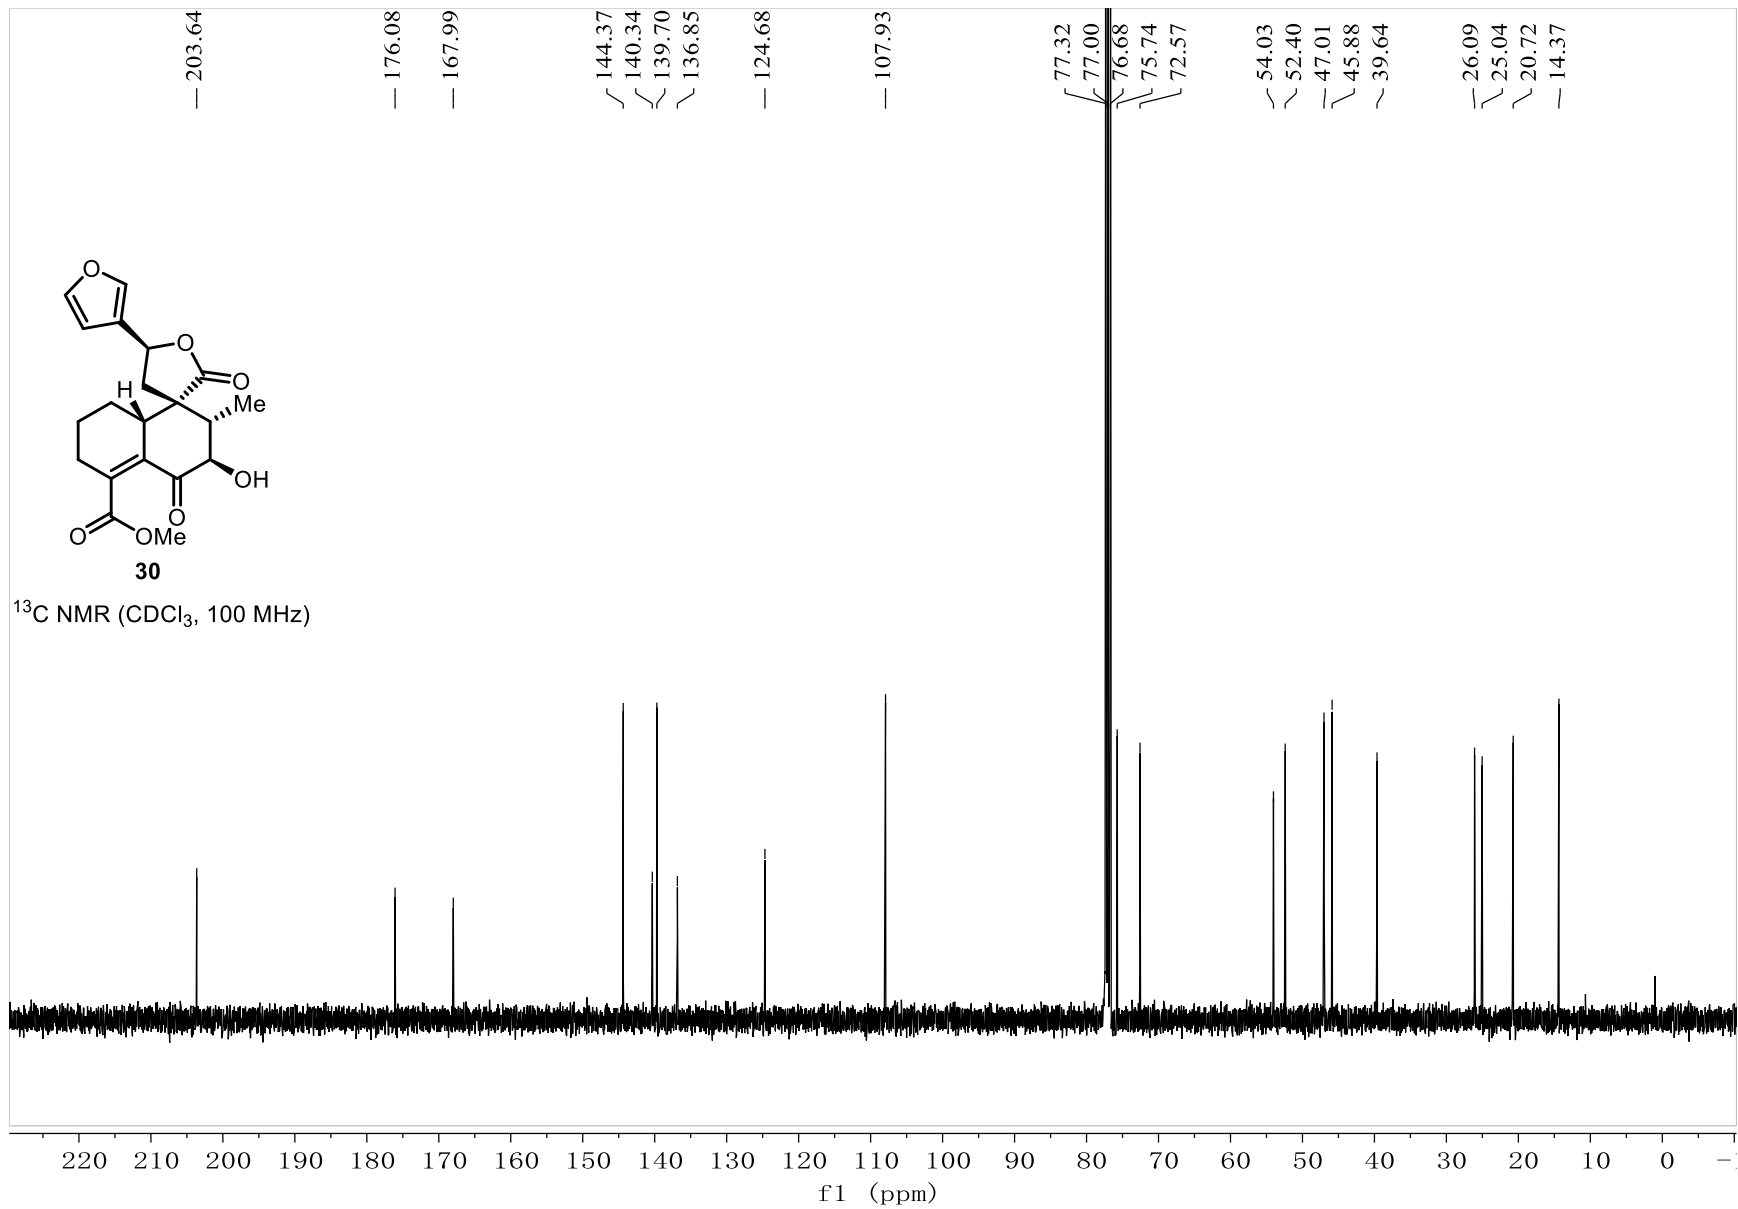

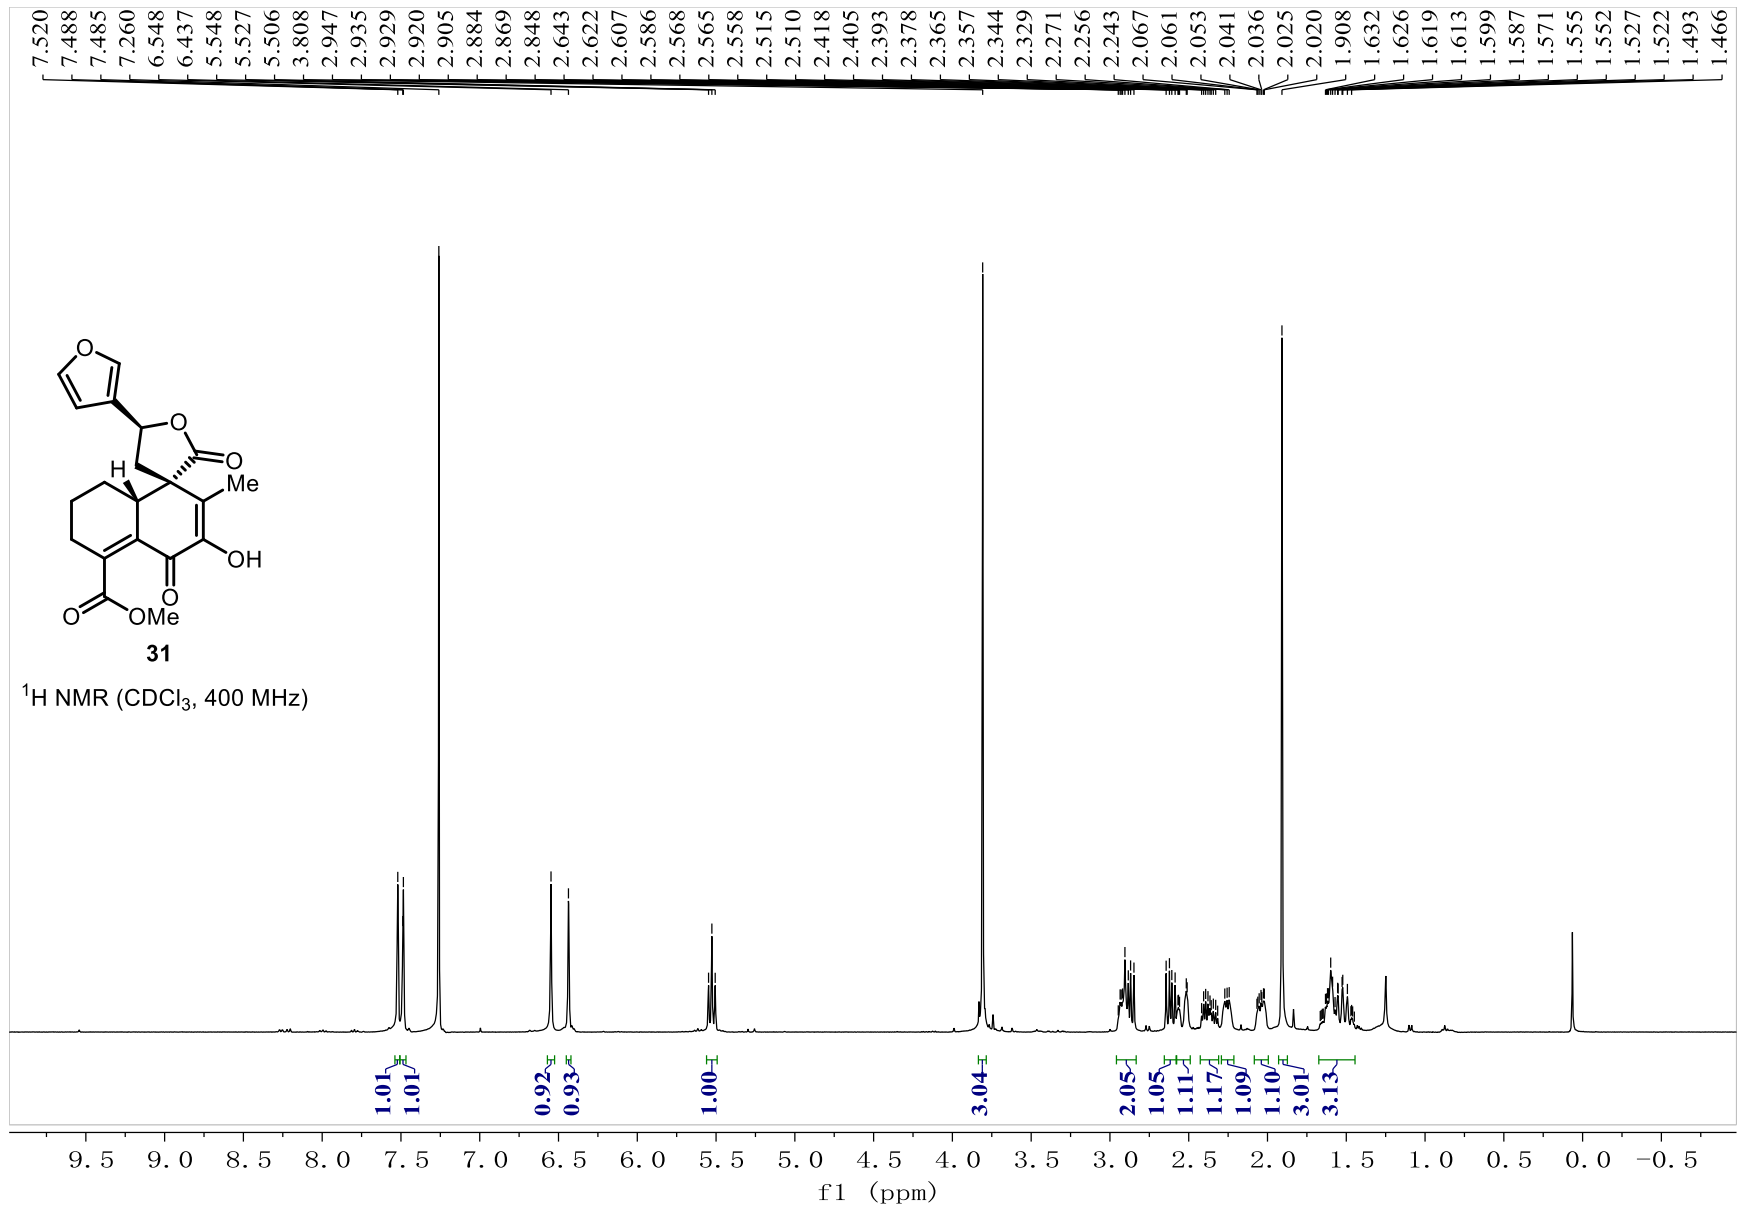

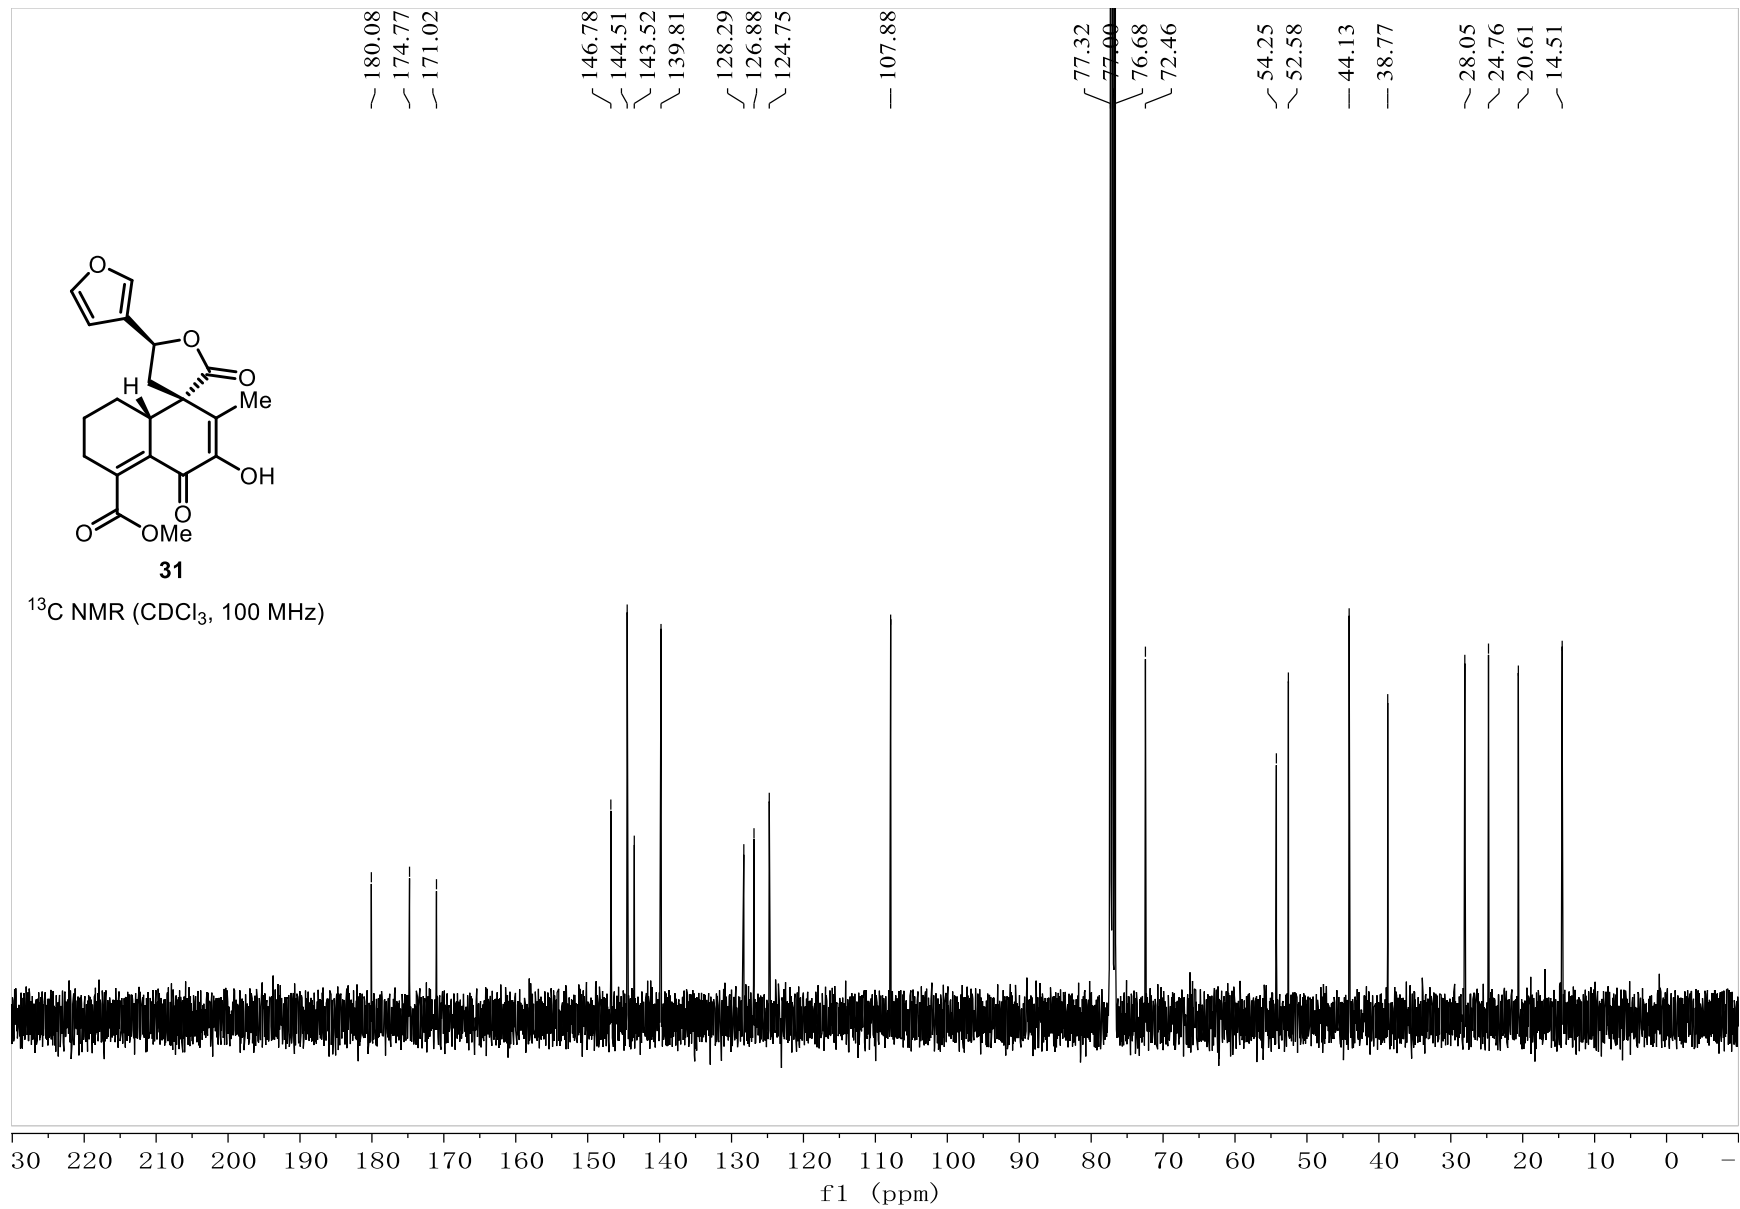

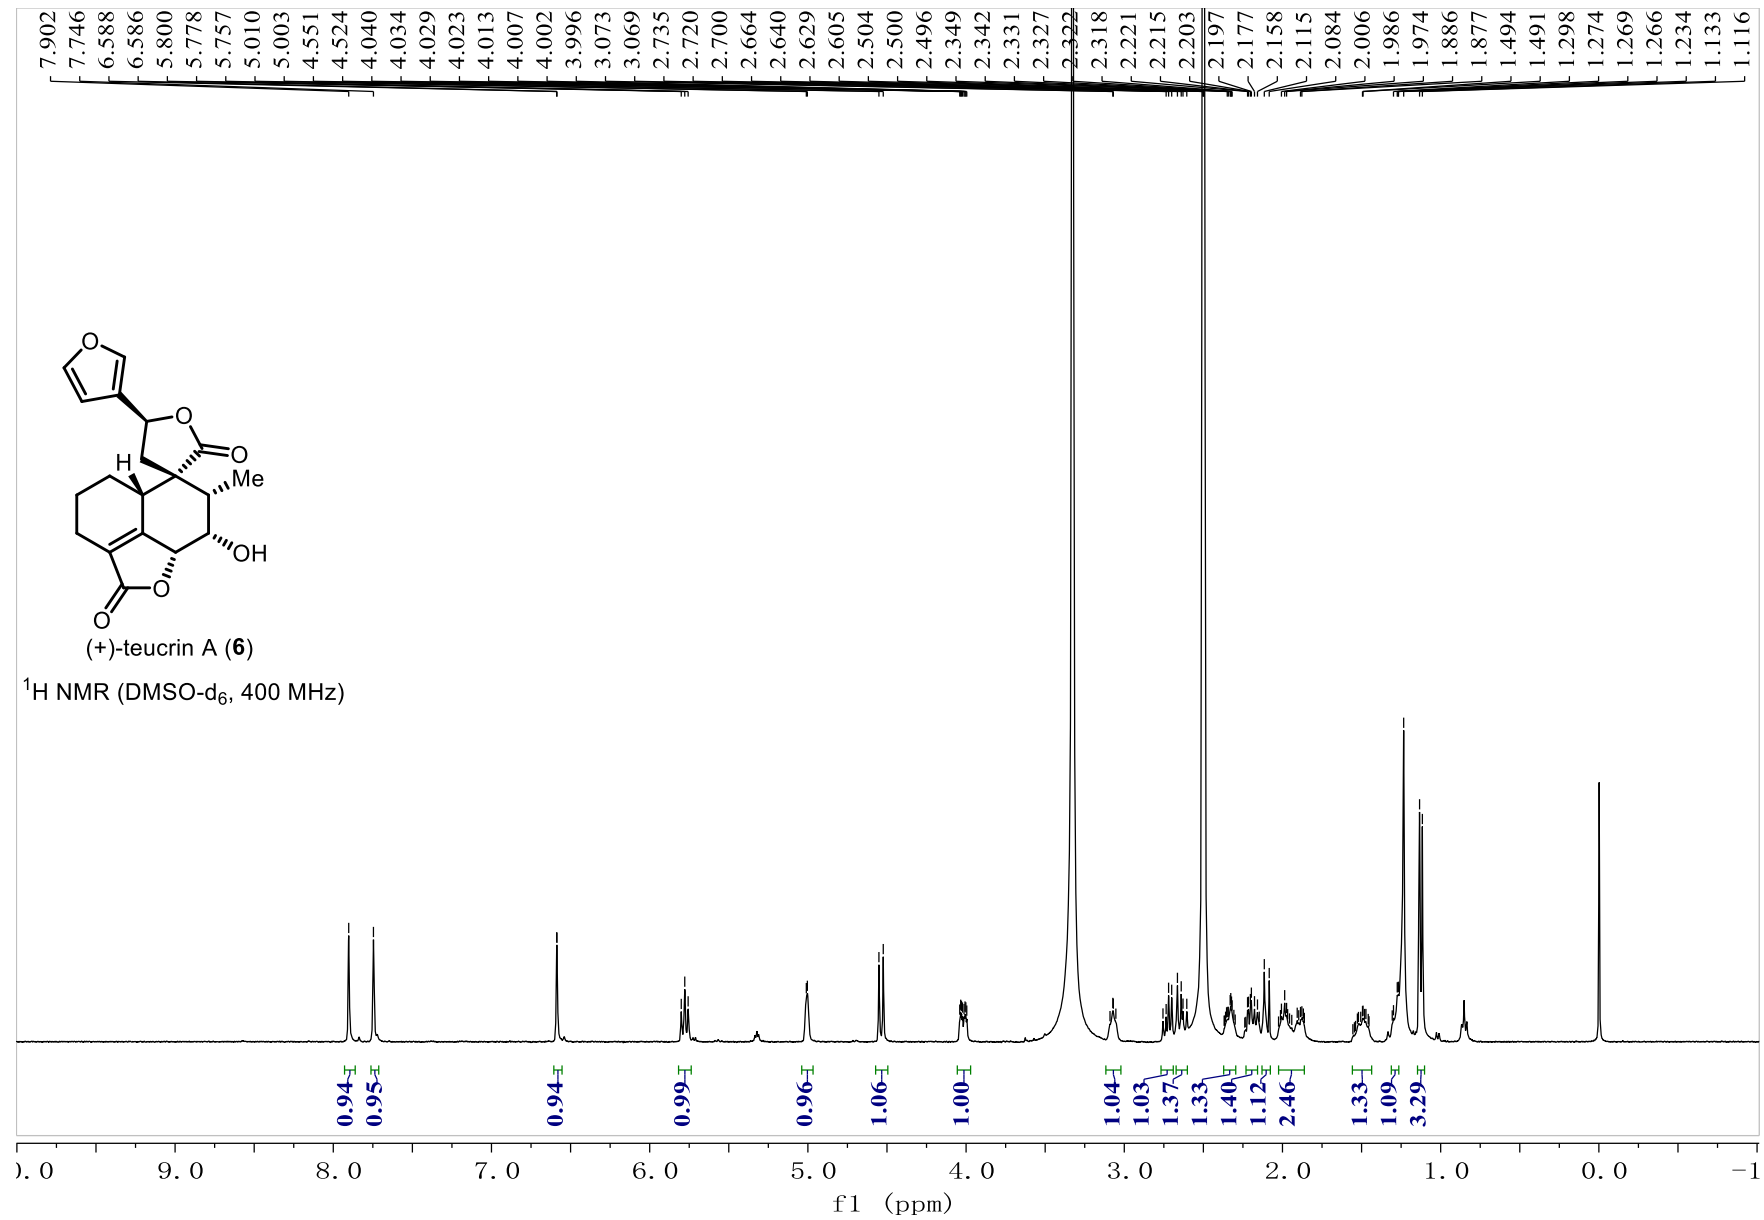

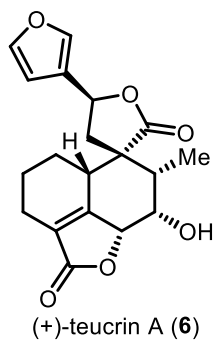

<sup>13</sup>C NMR (DMSO-d<sub>6</sub>, 100 MHz)

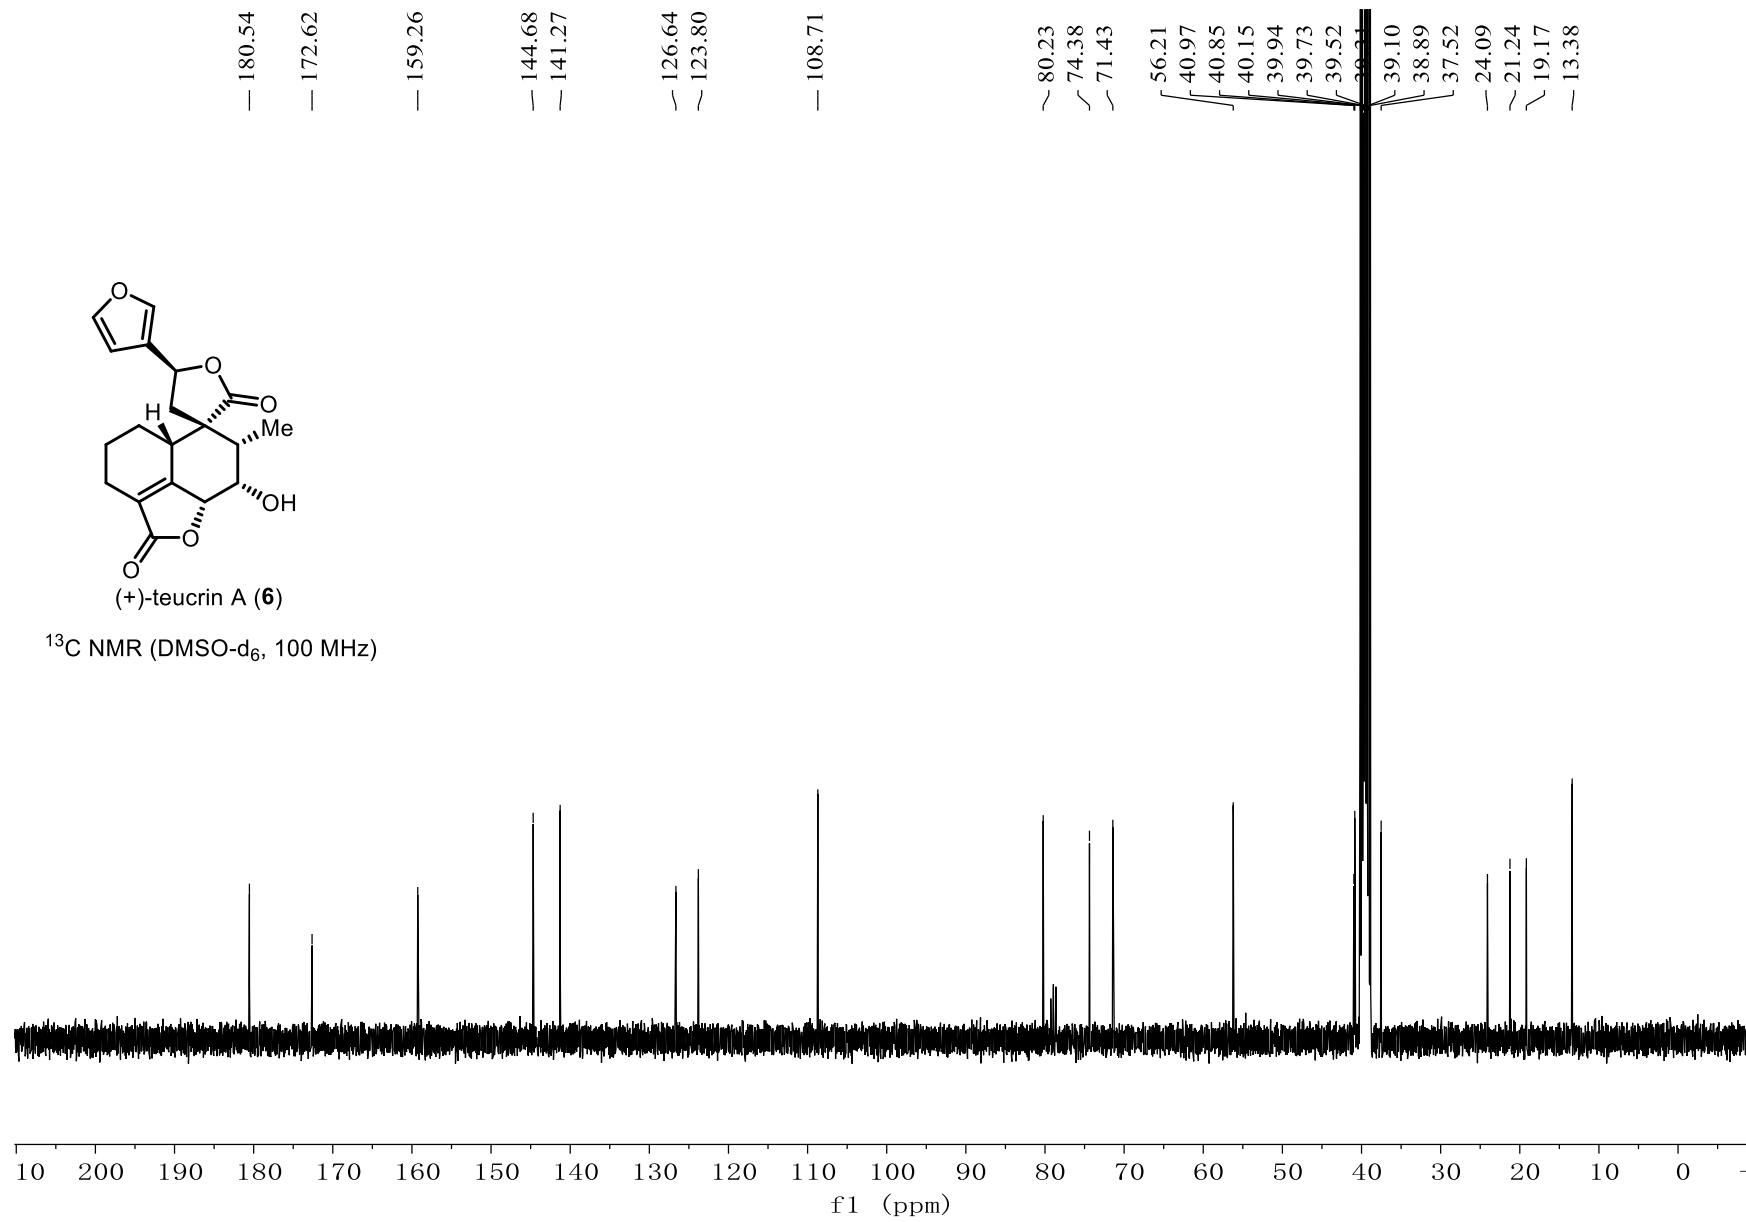



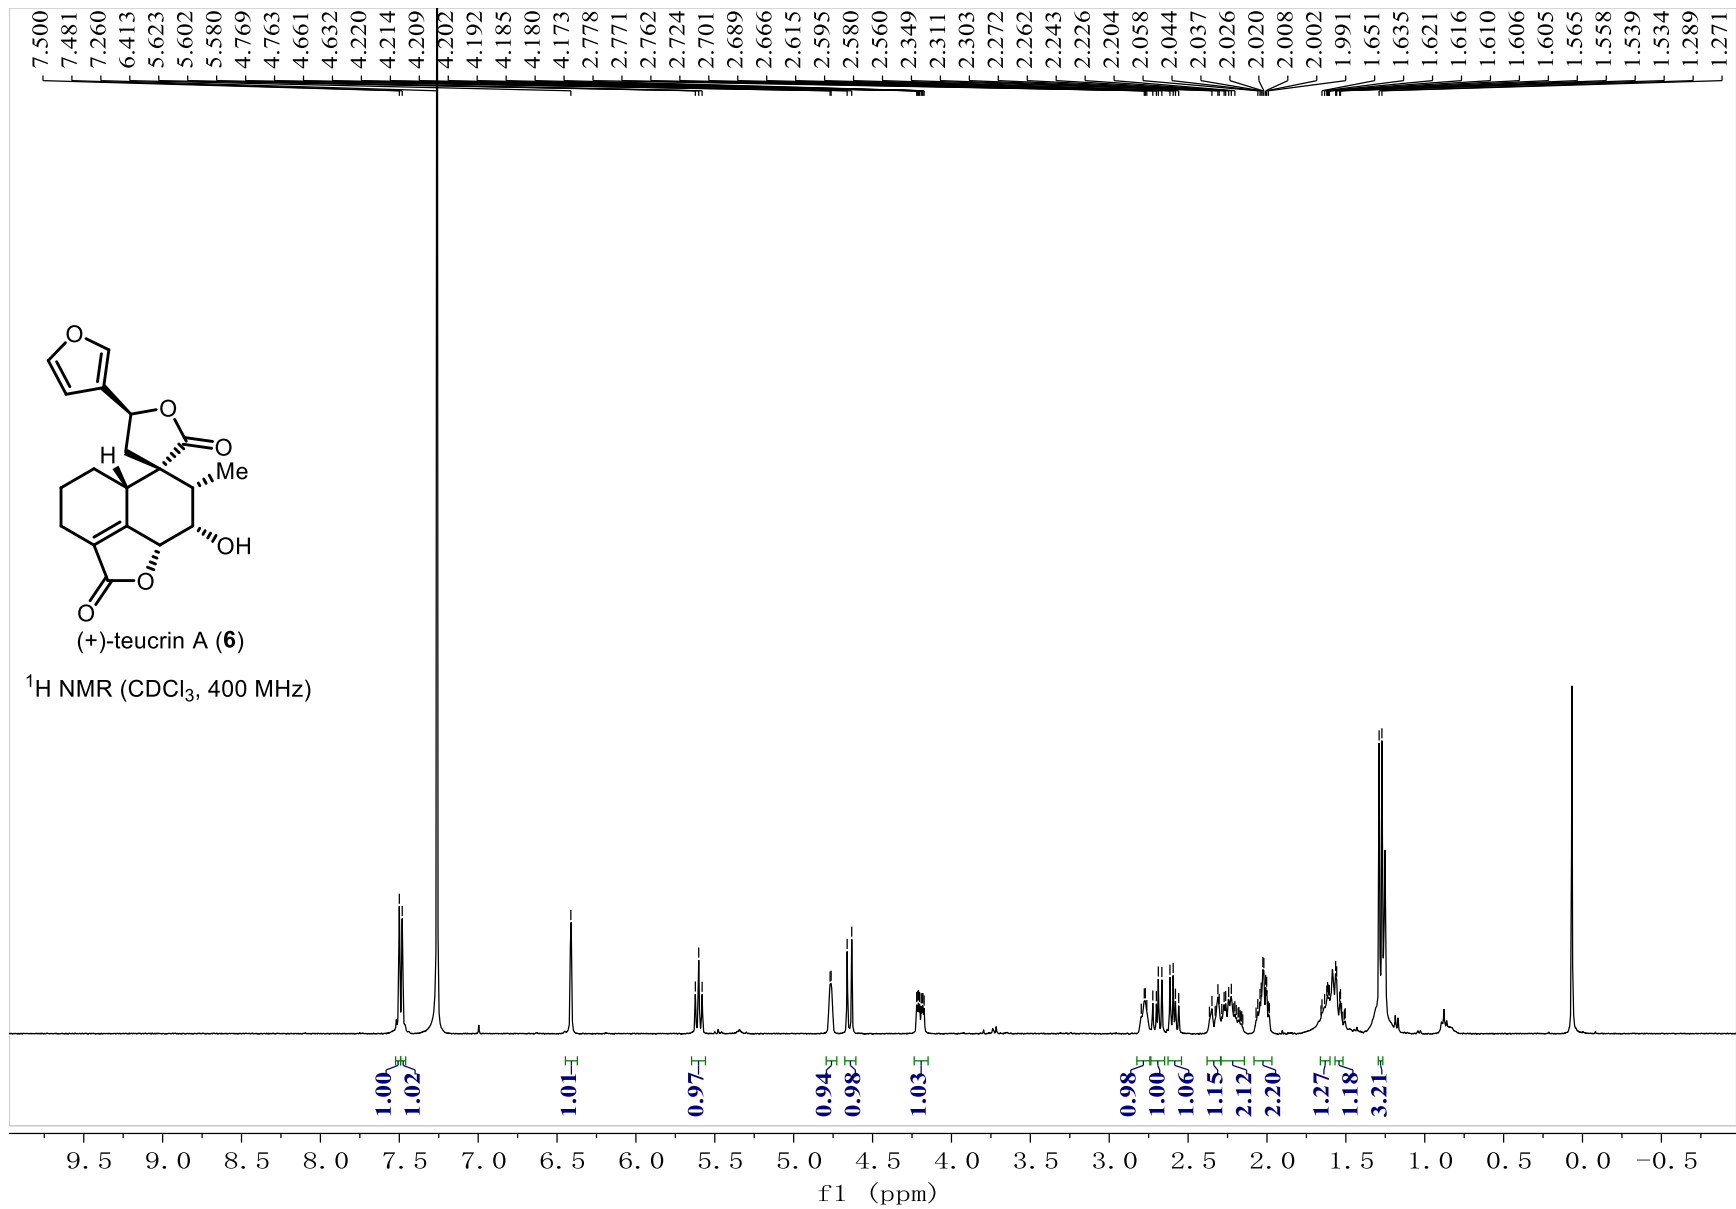

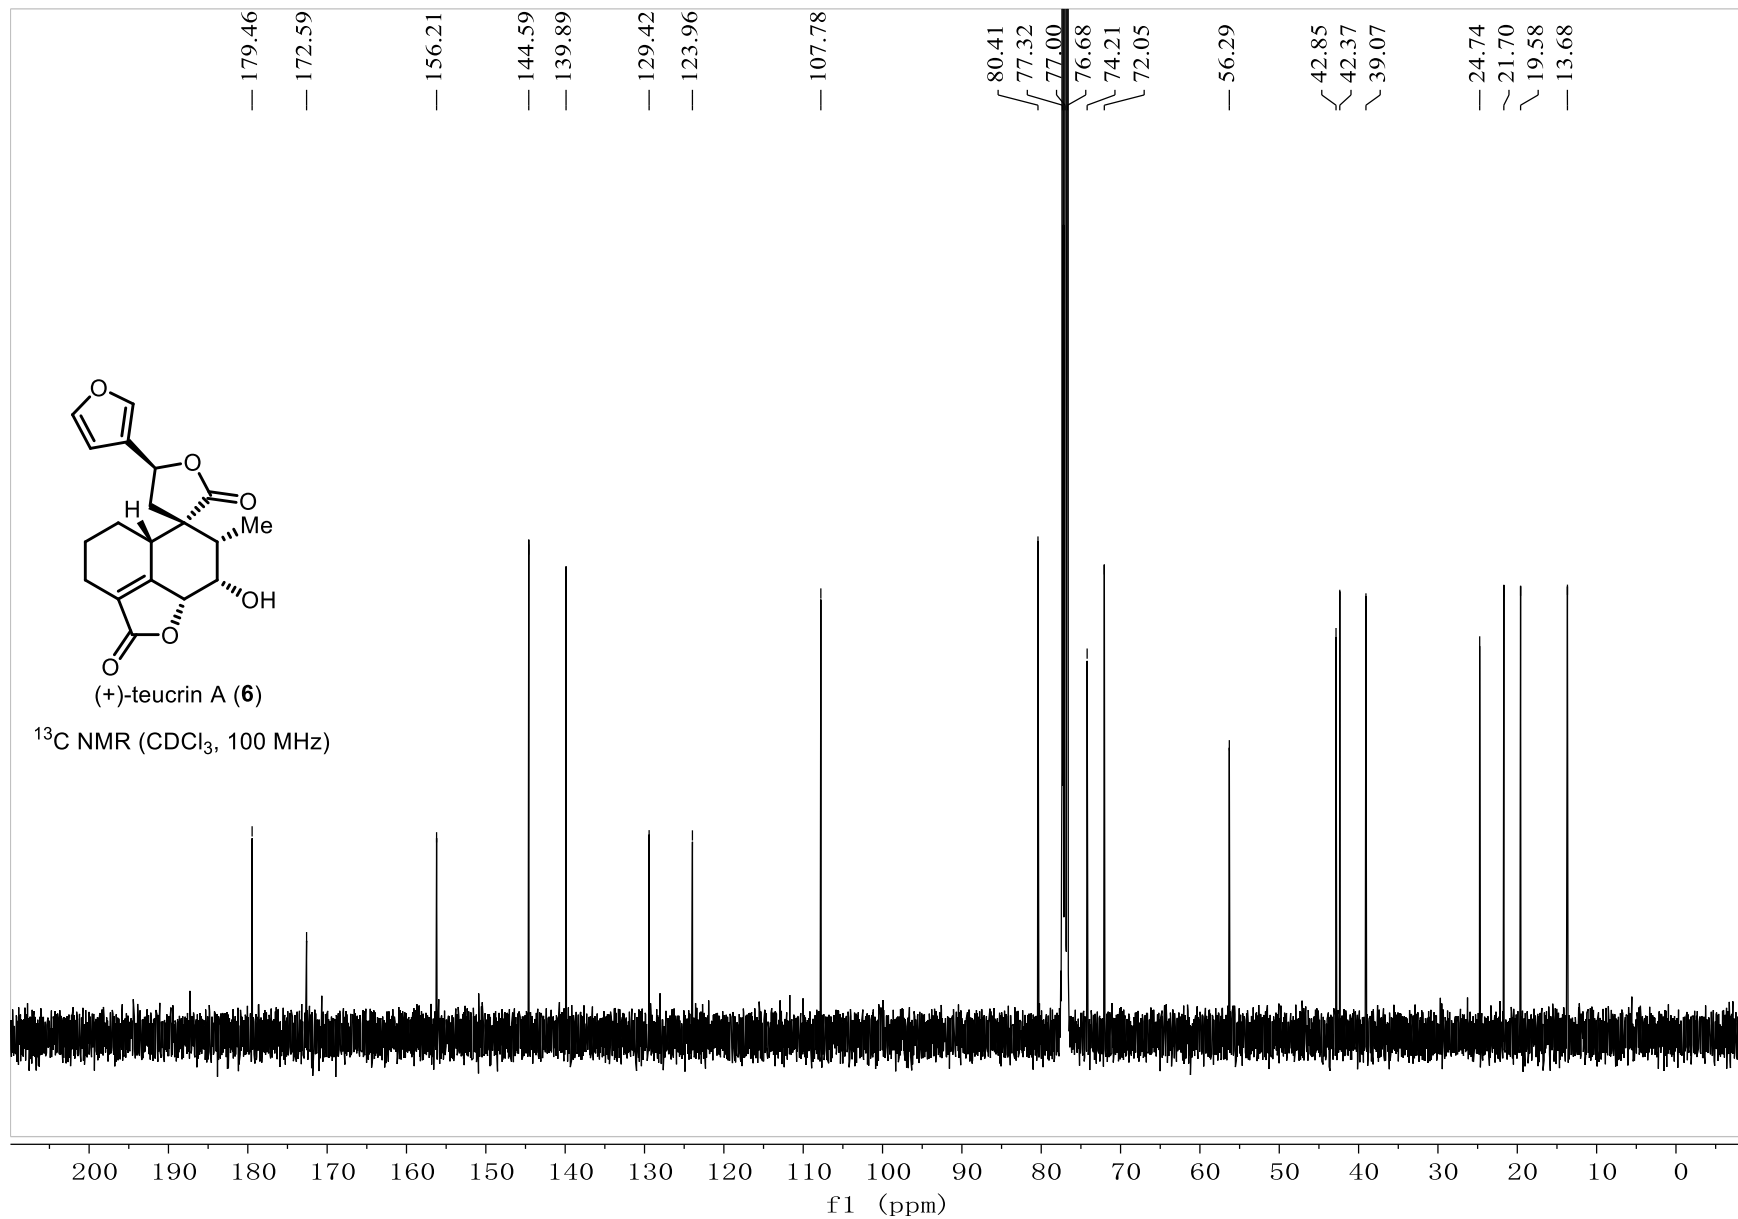

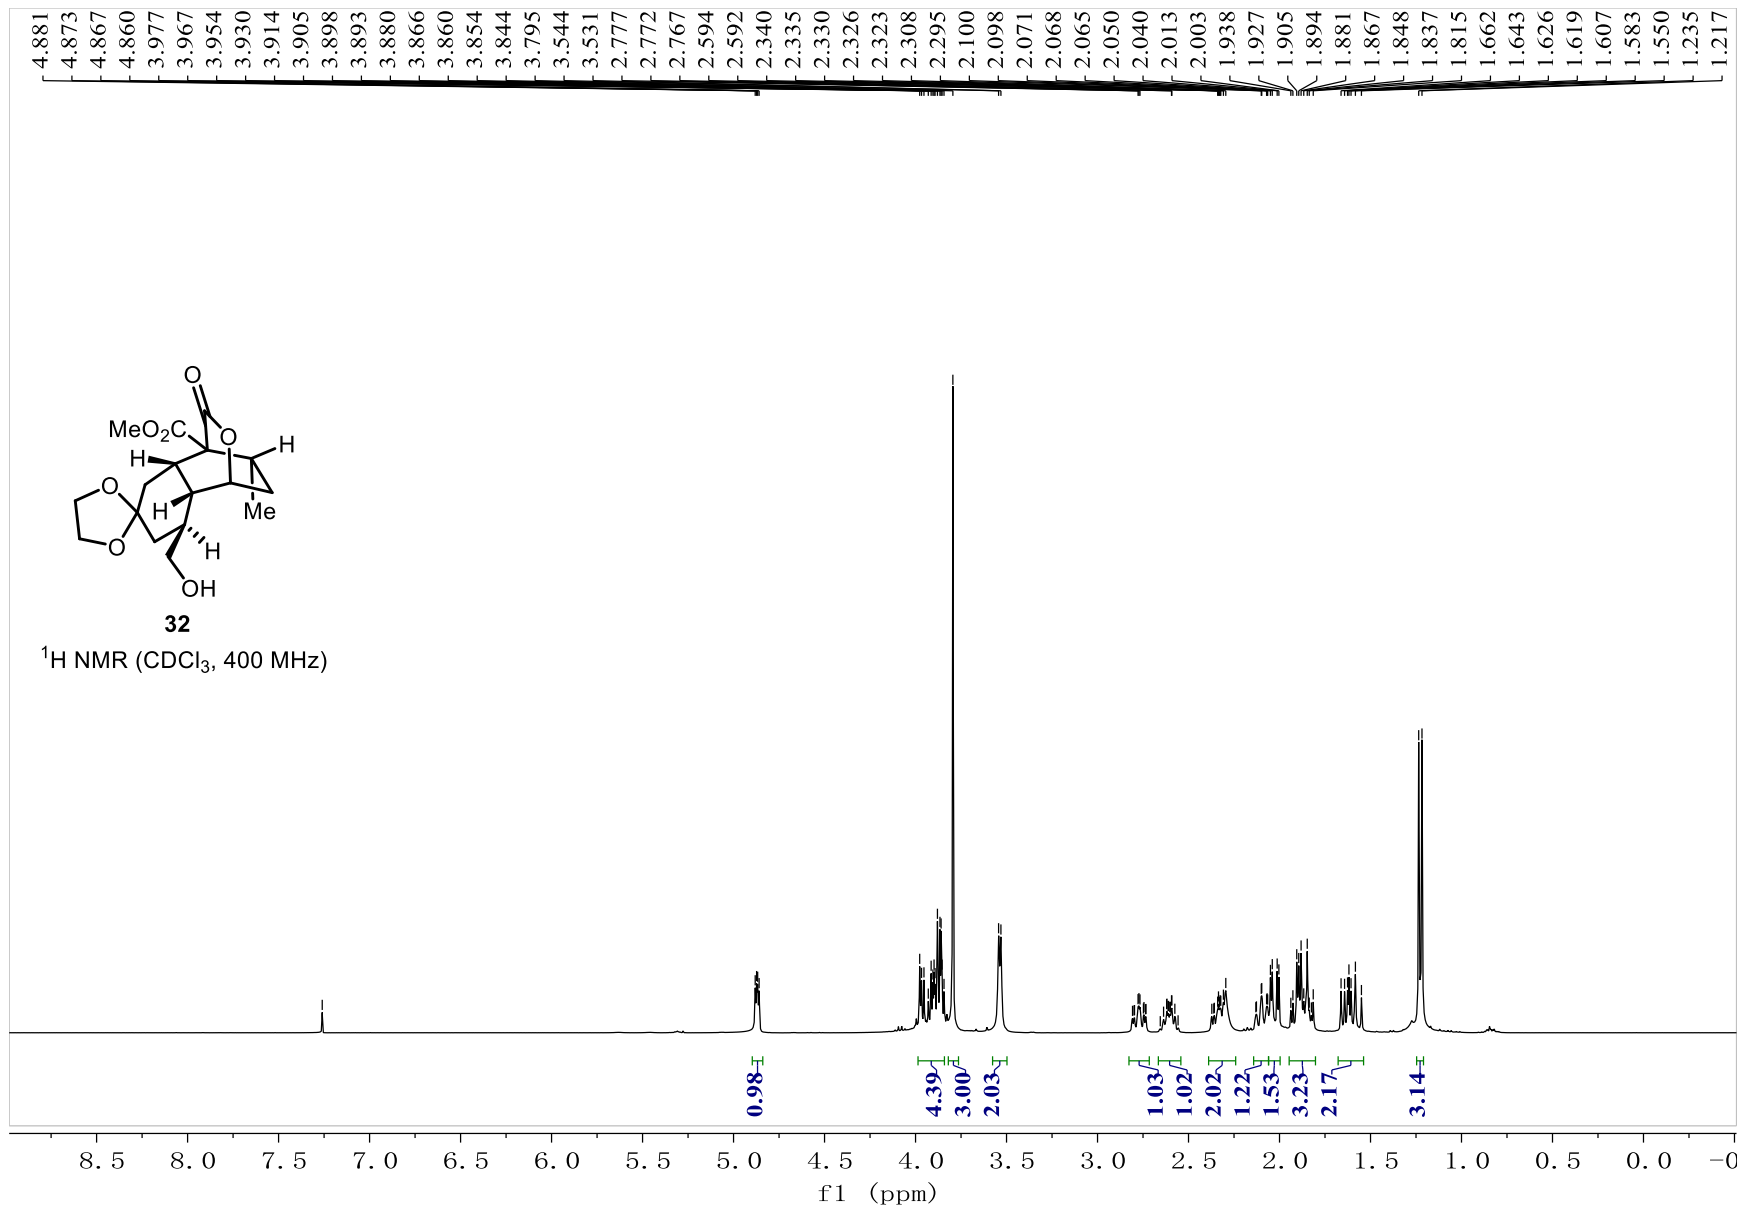

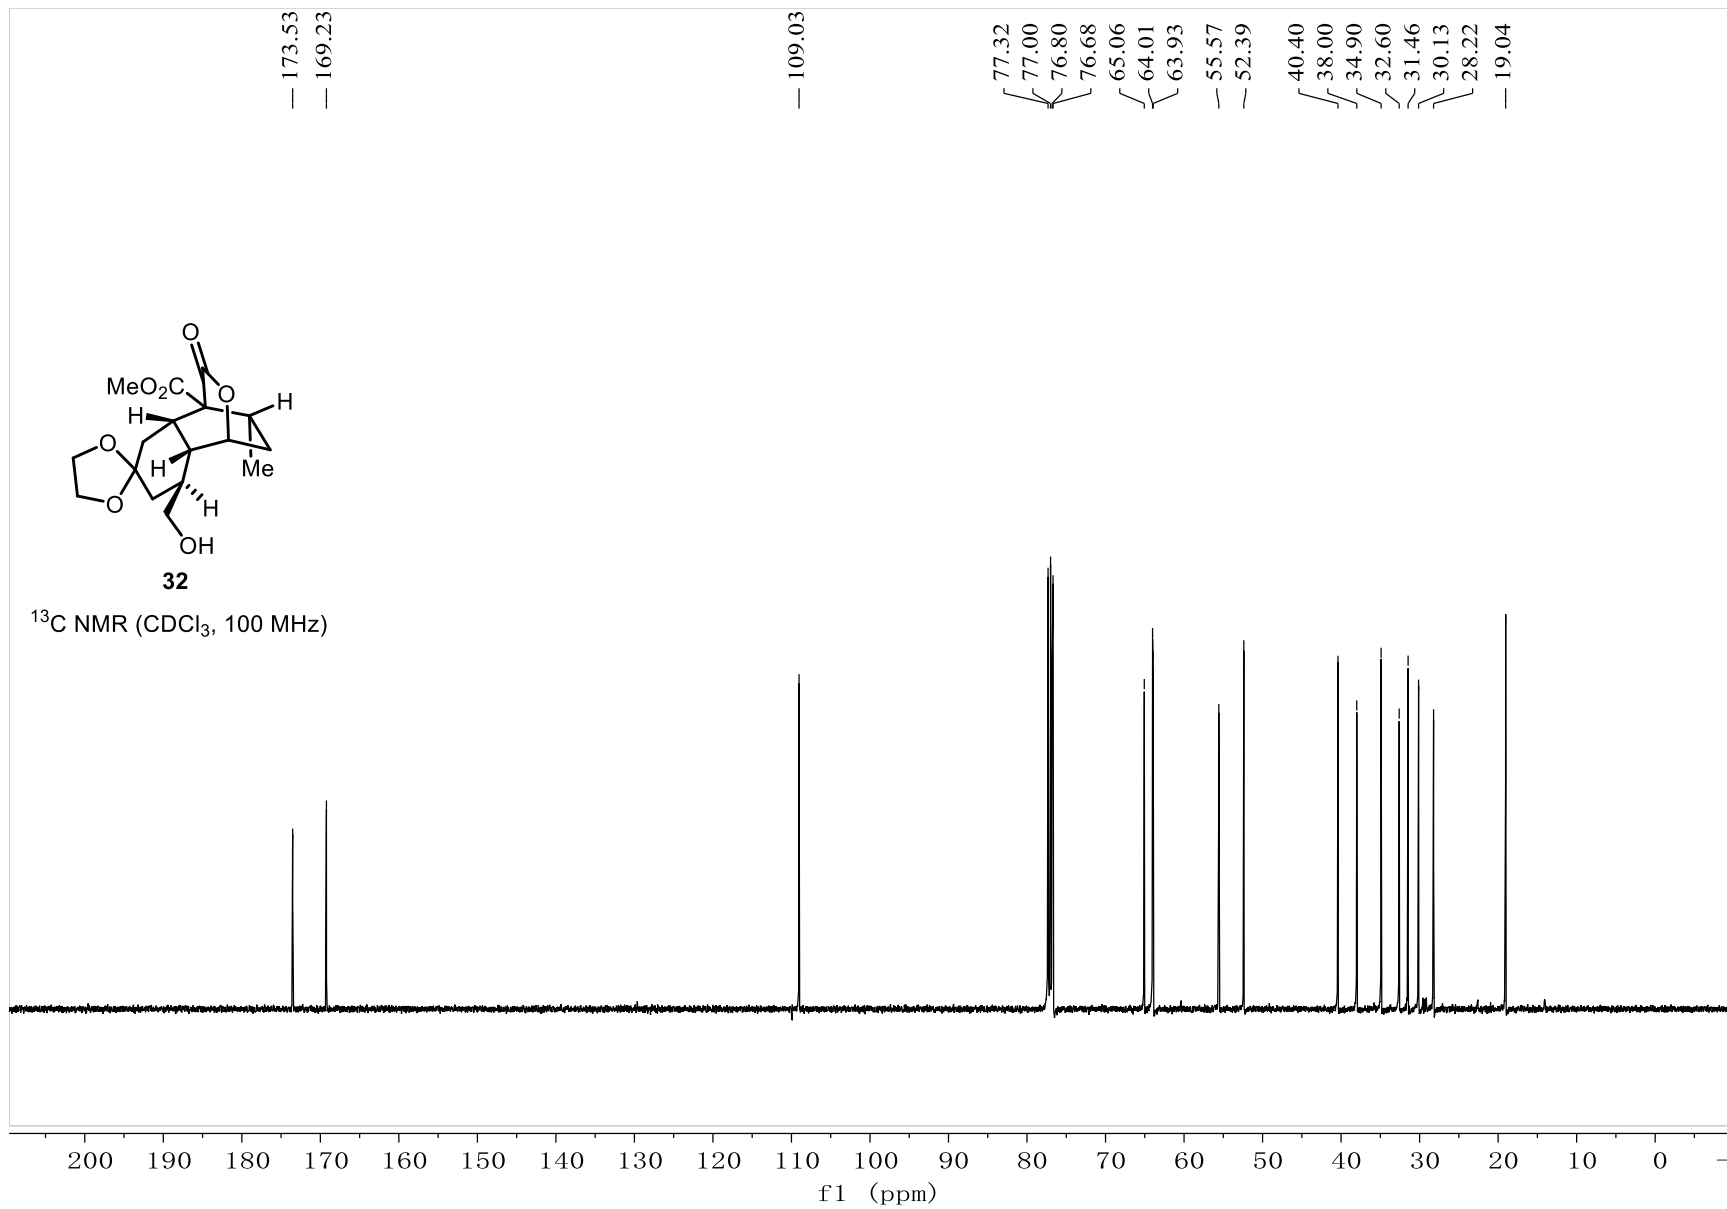

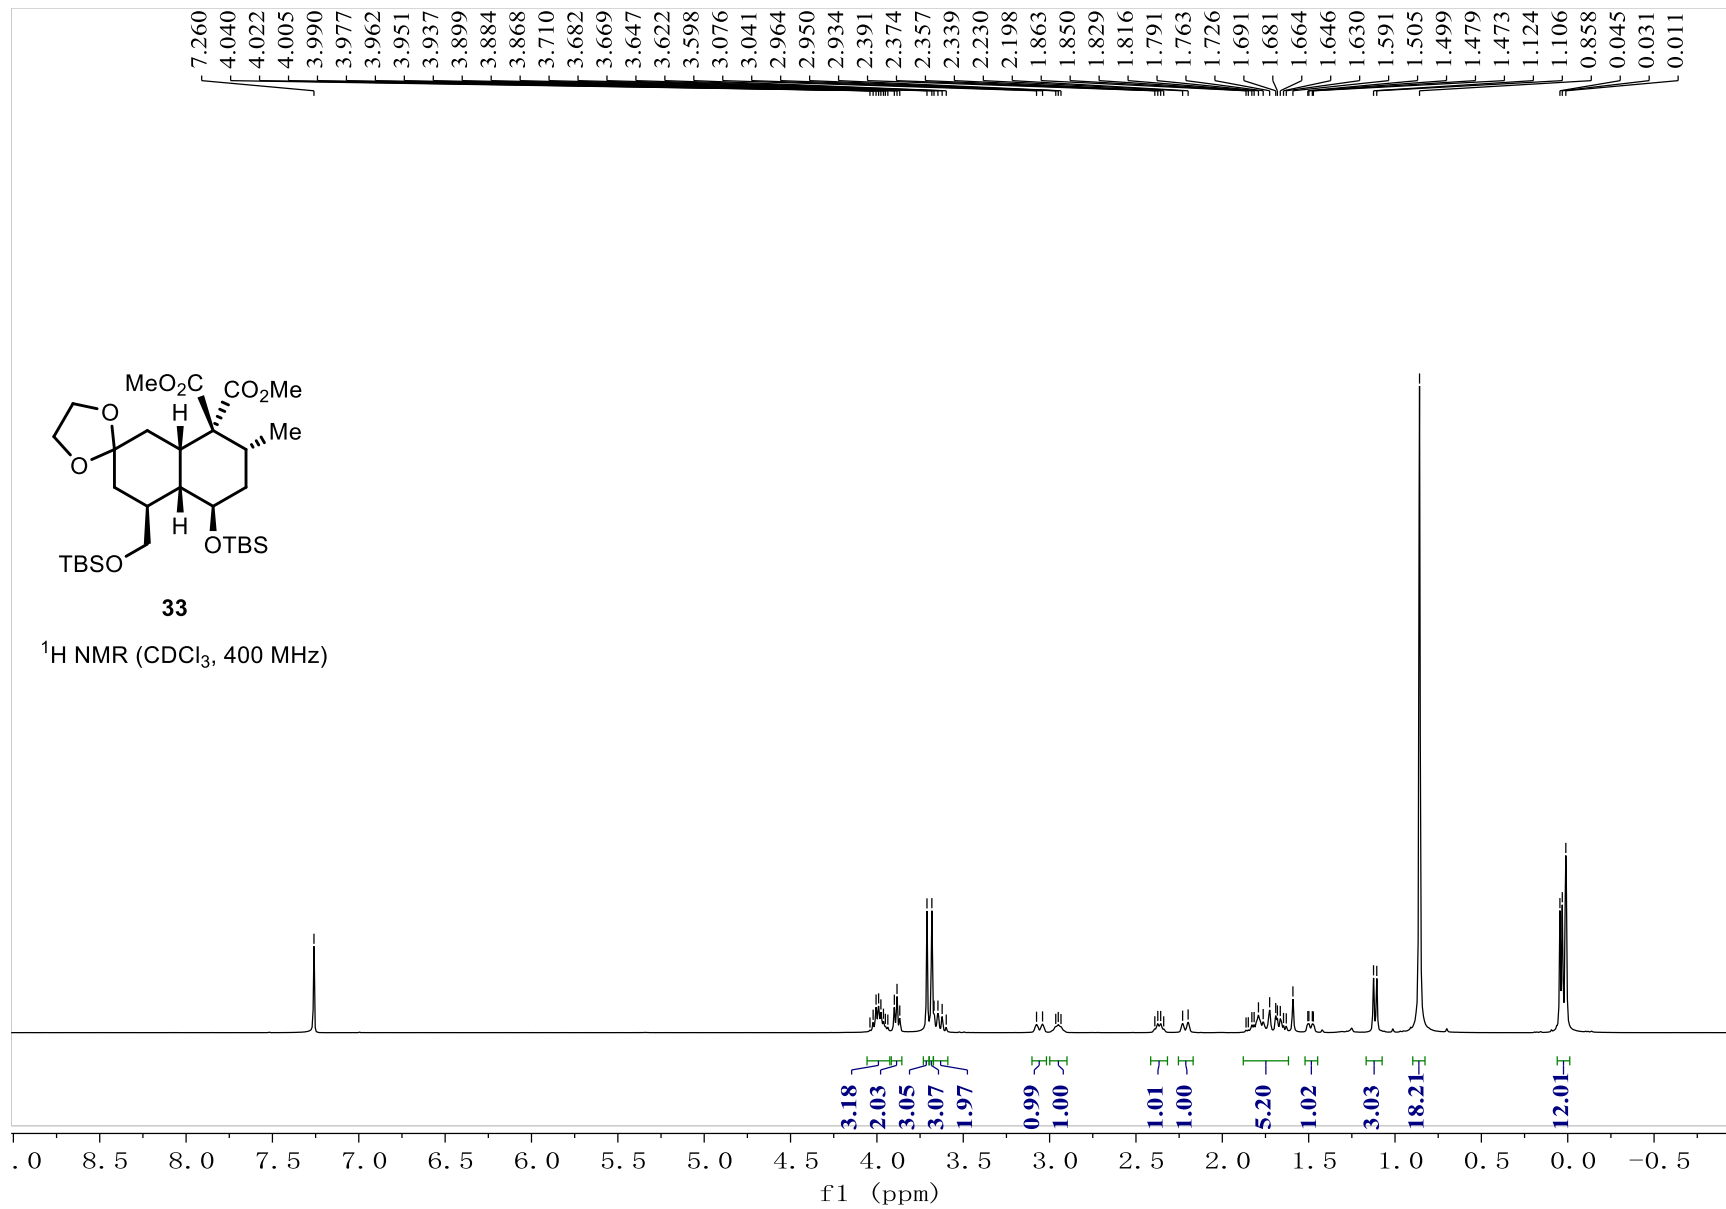

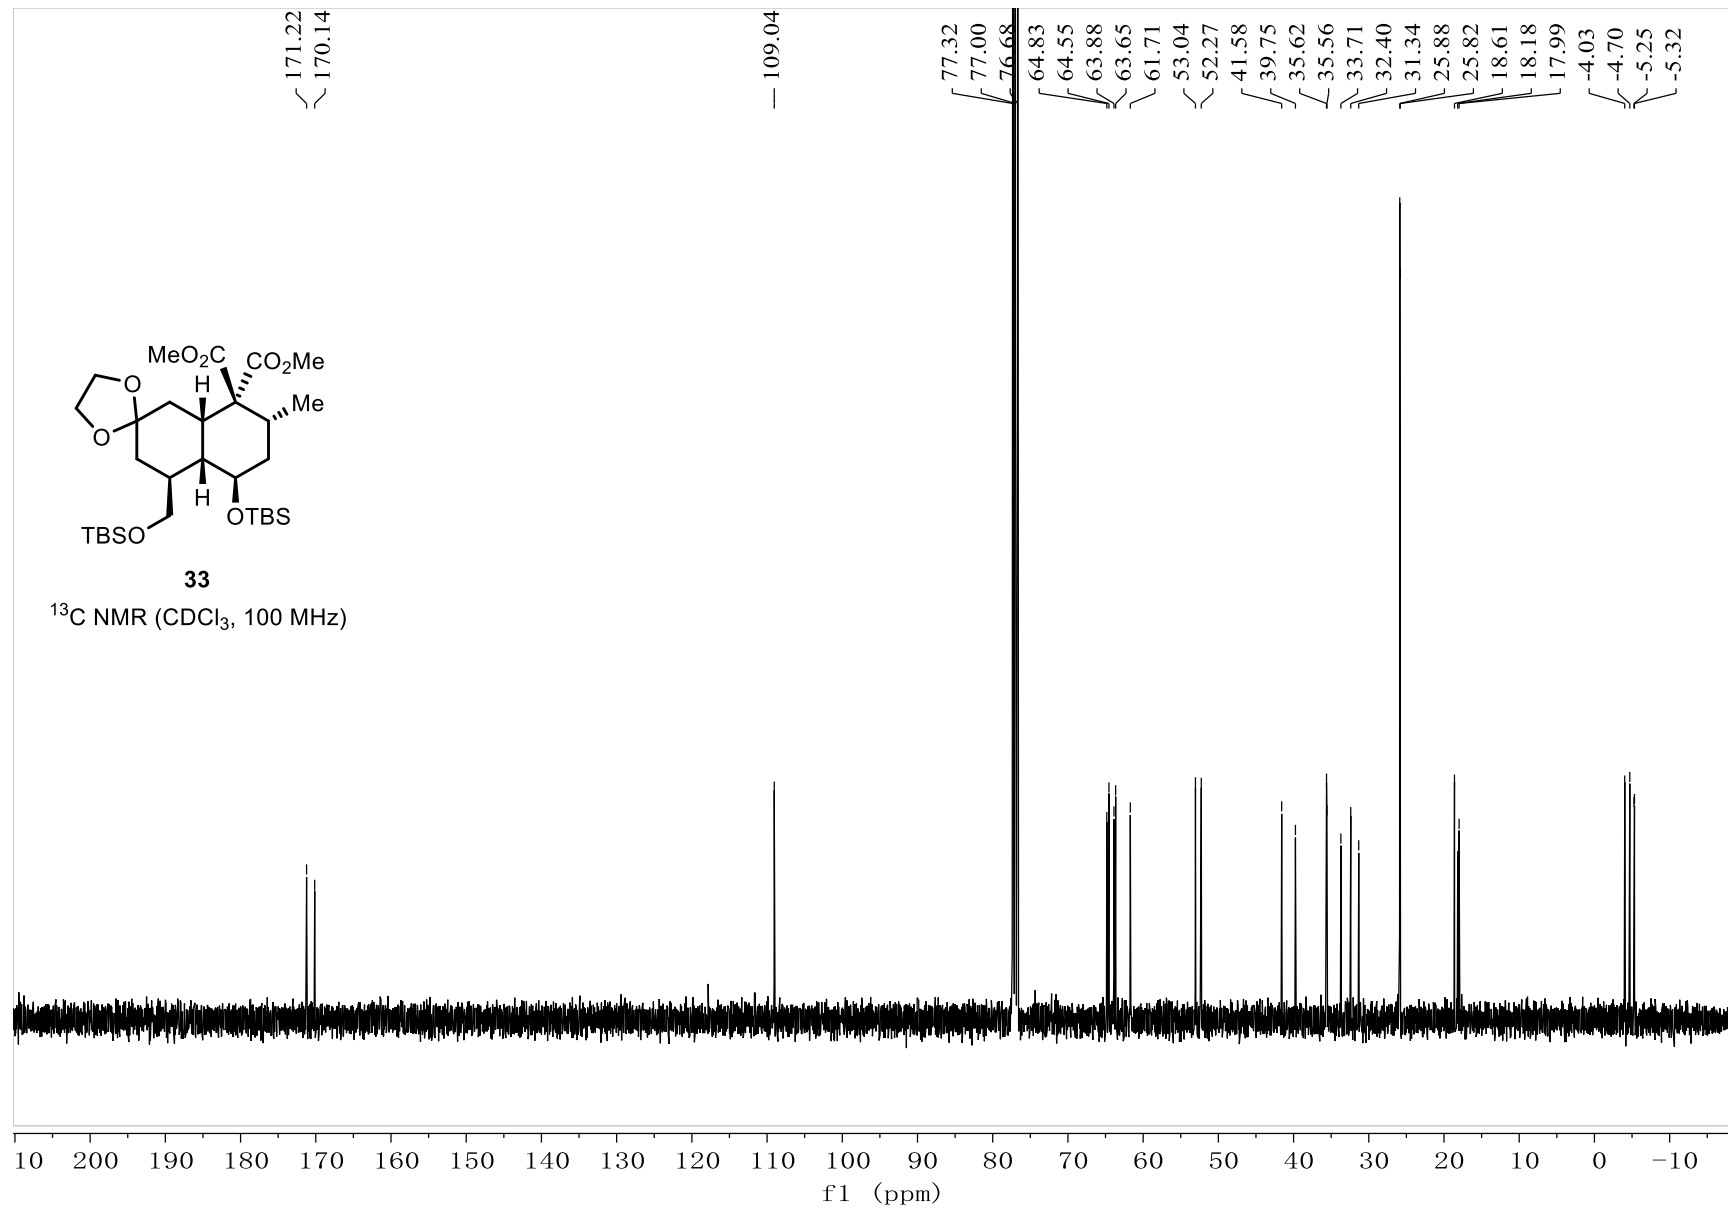

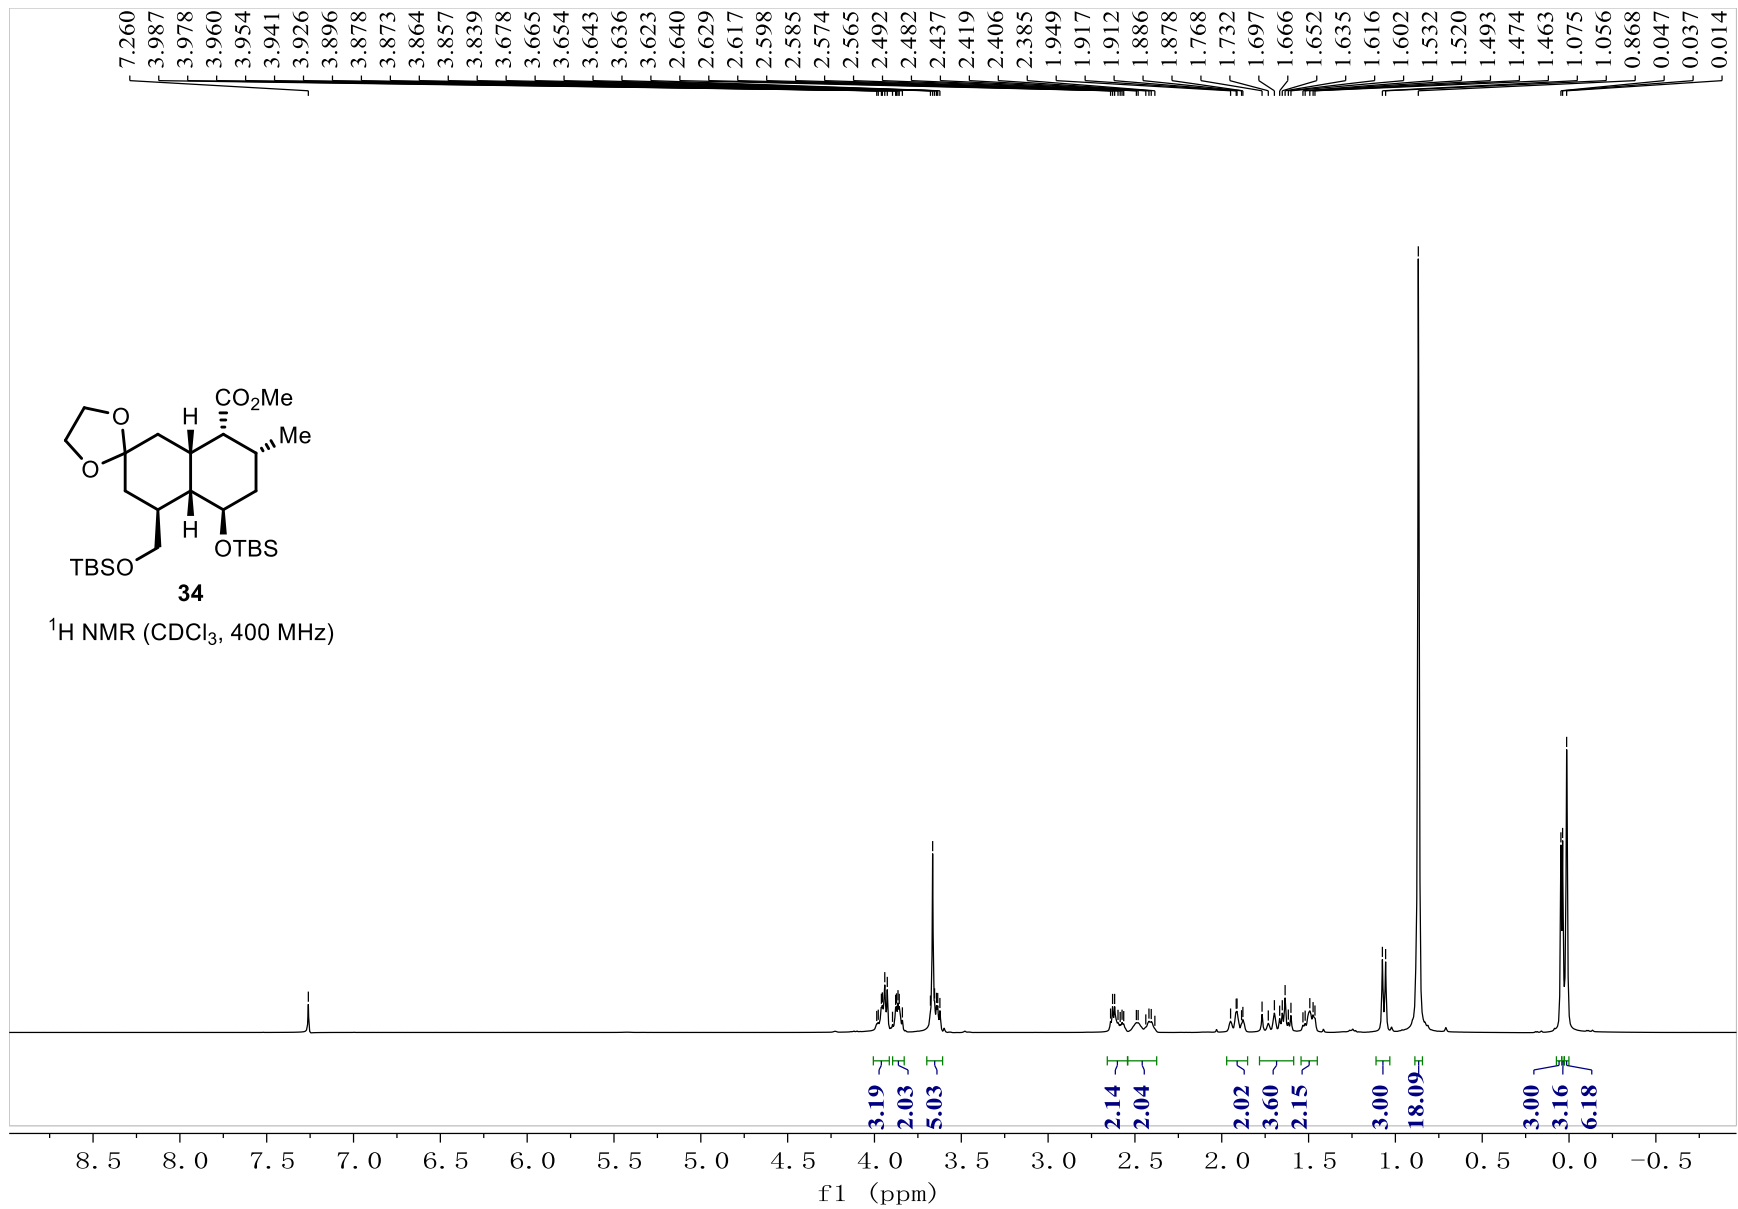

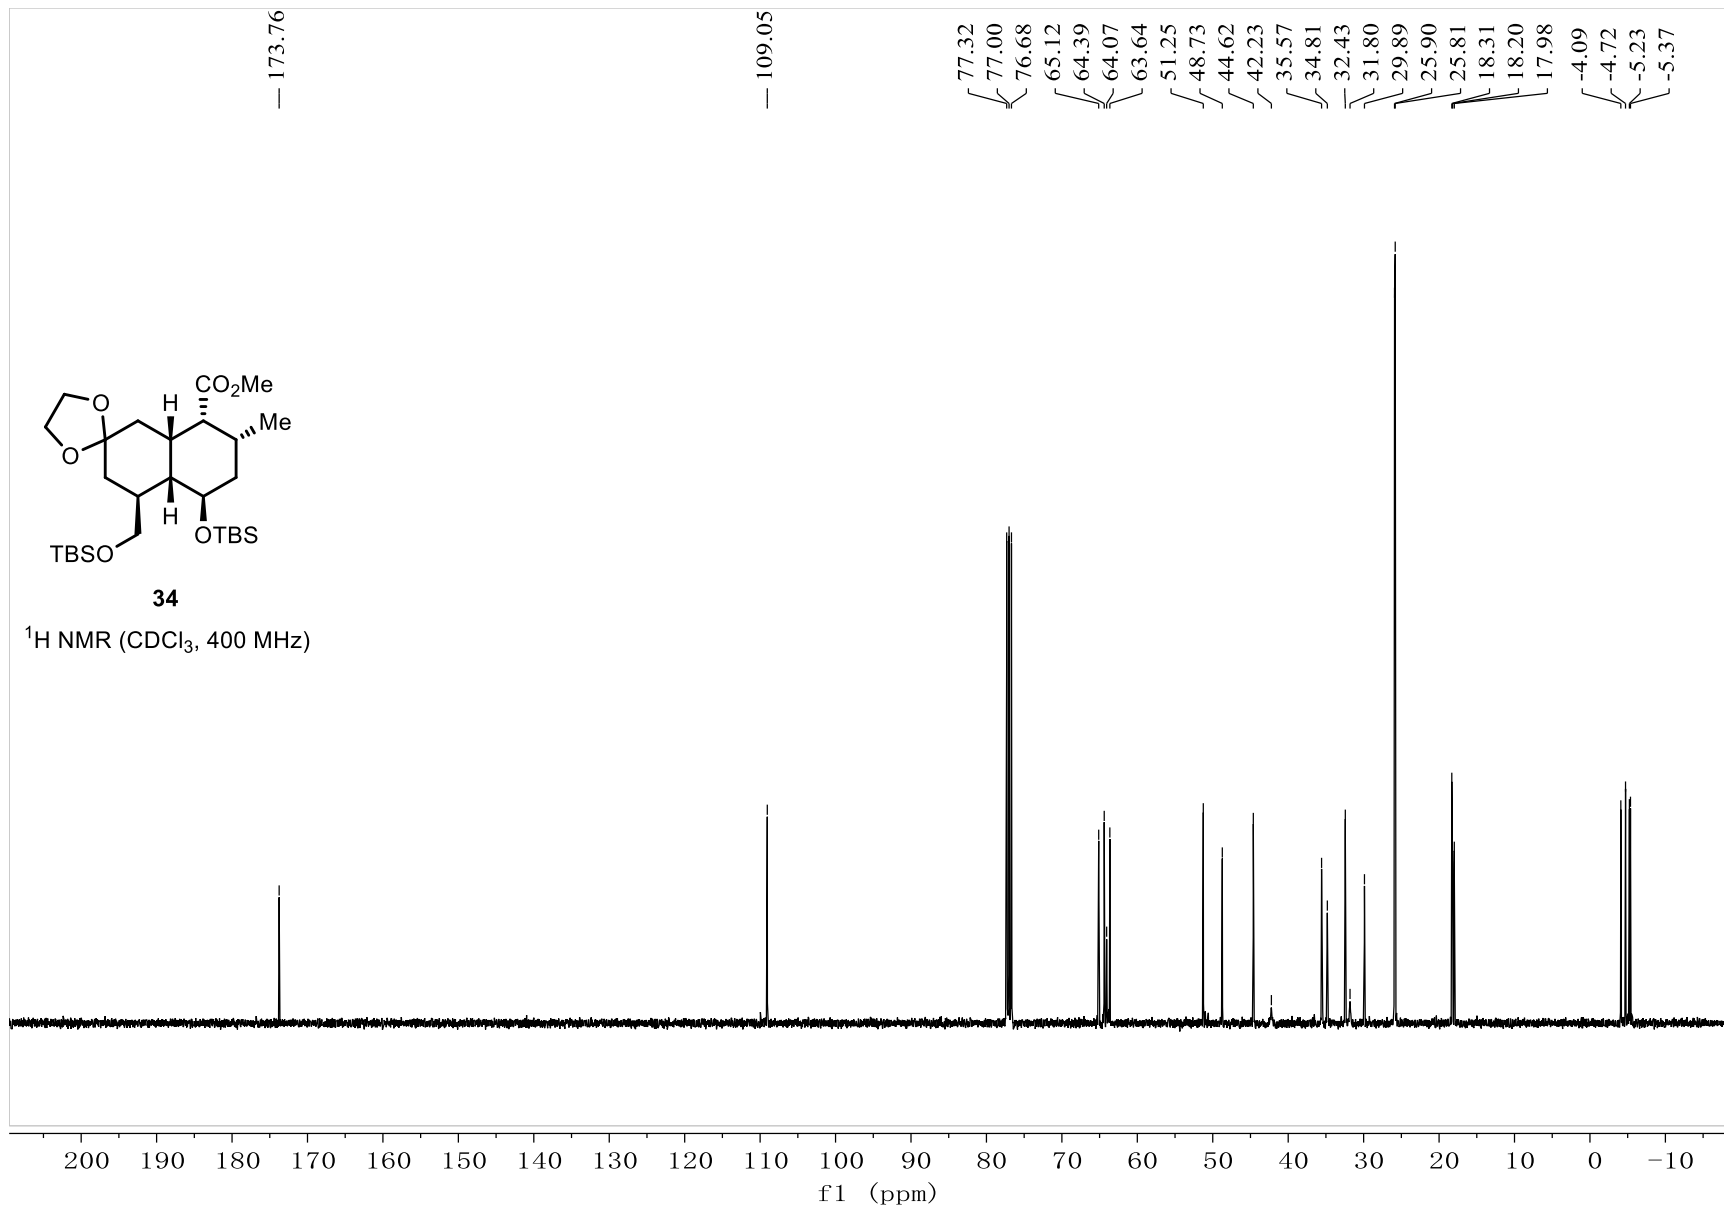



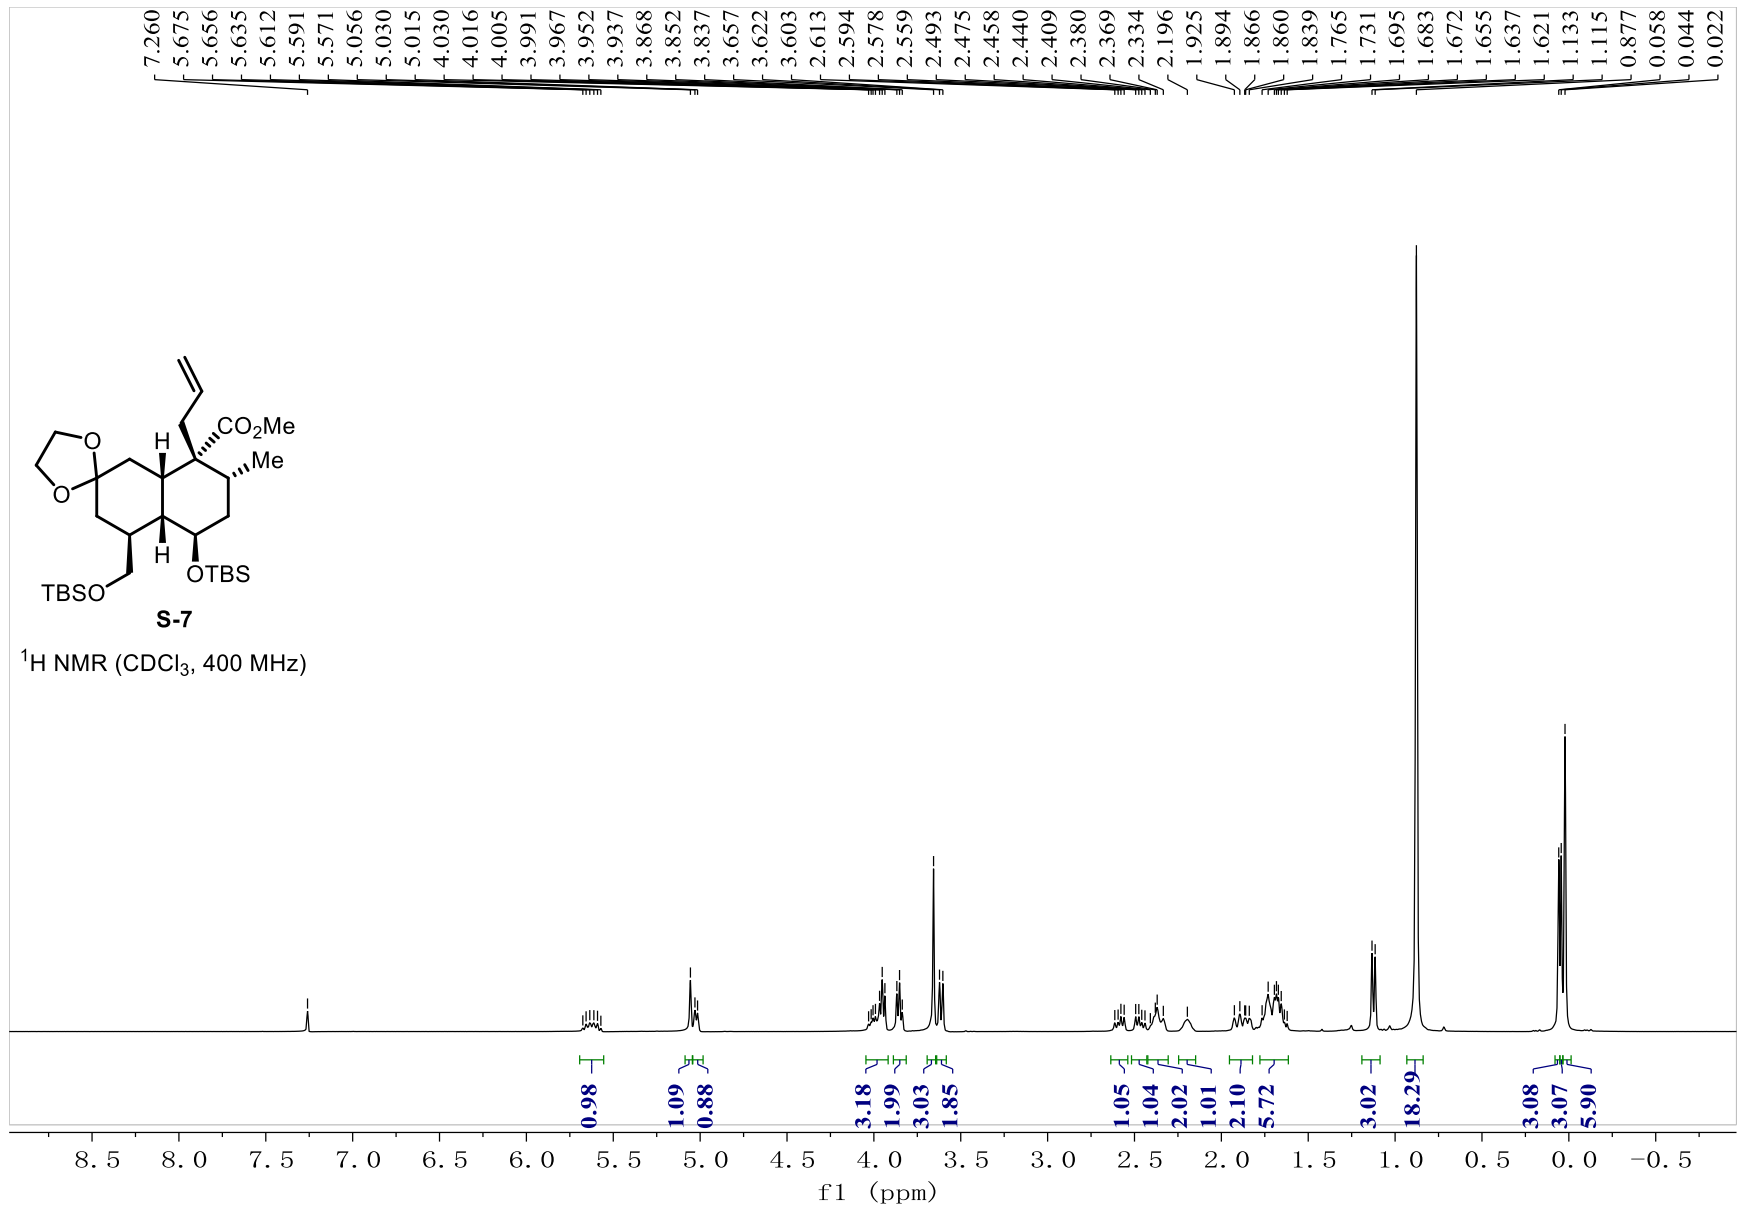

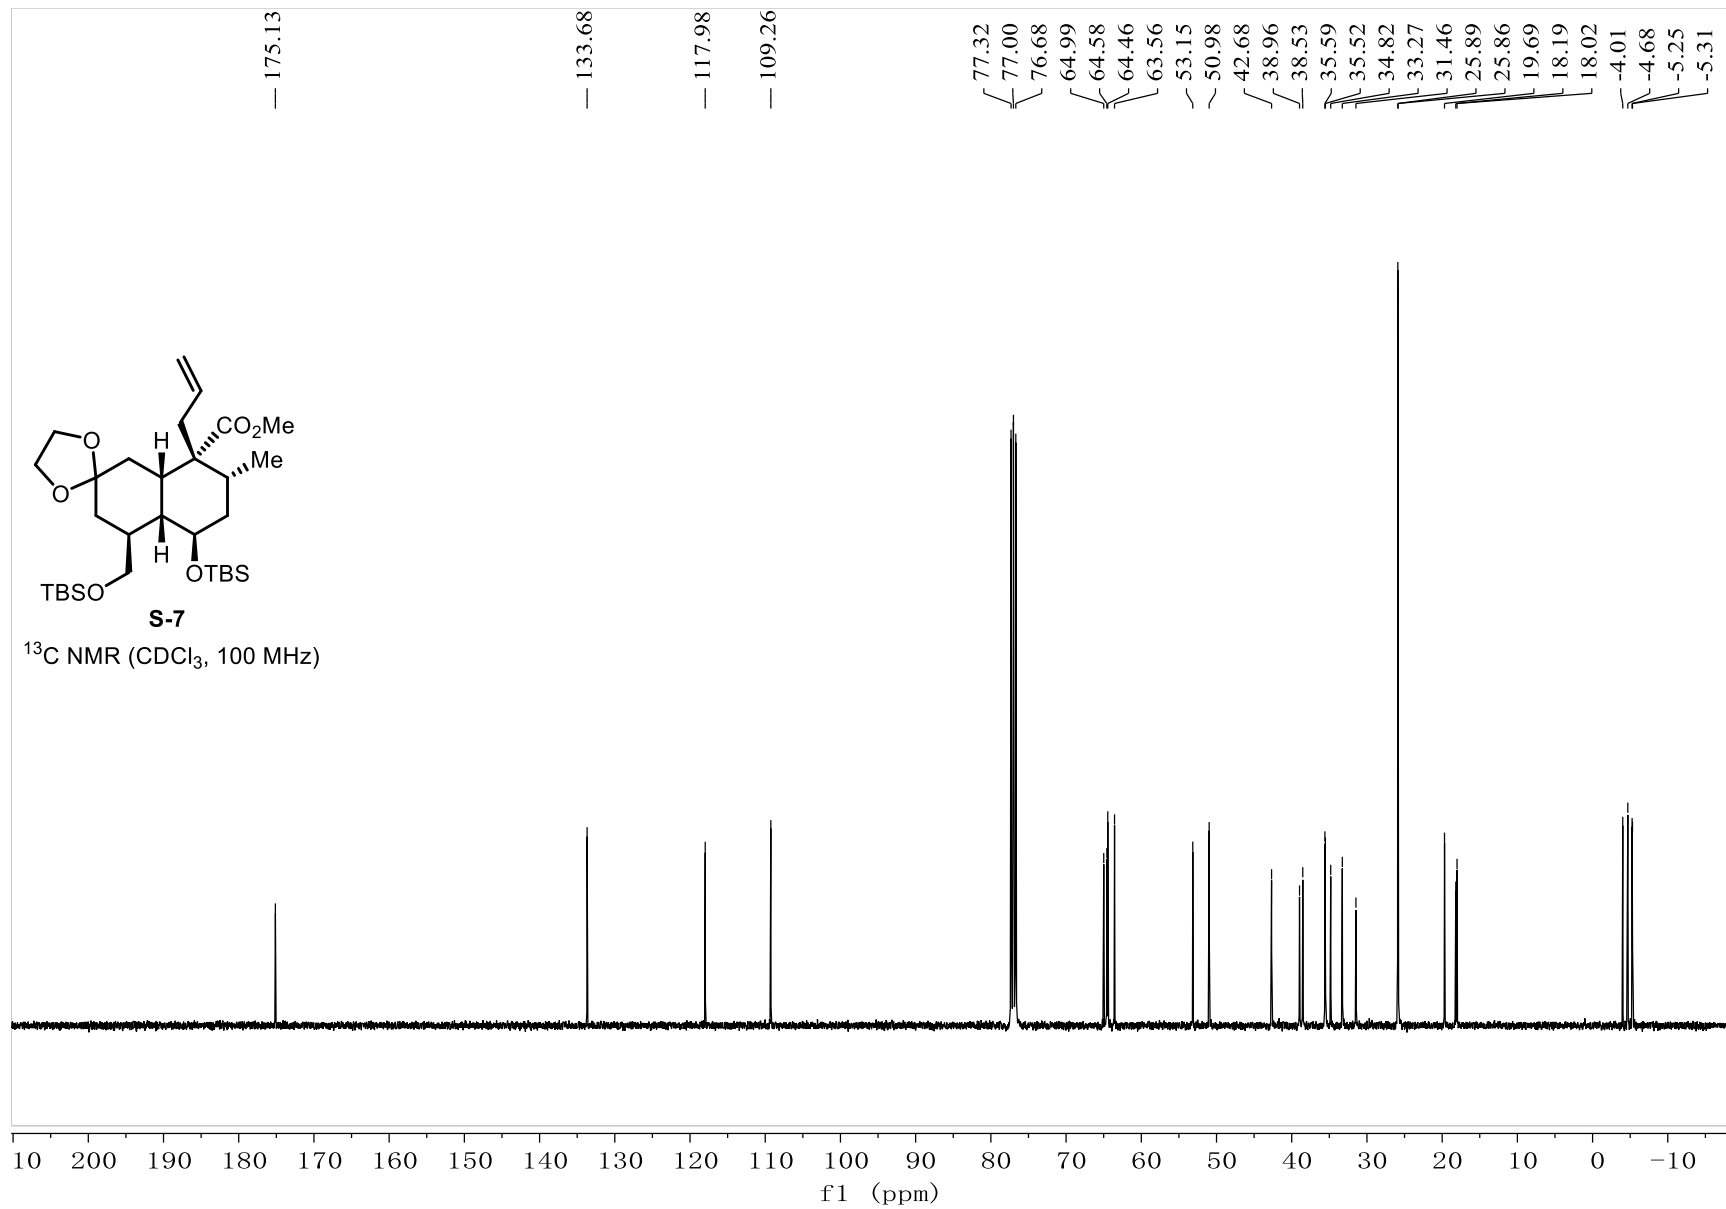

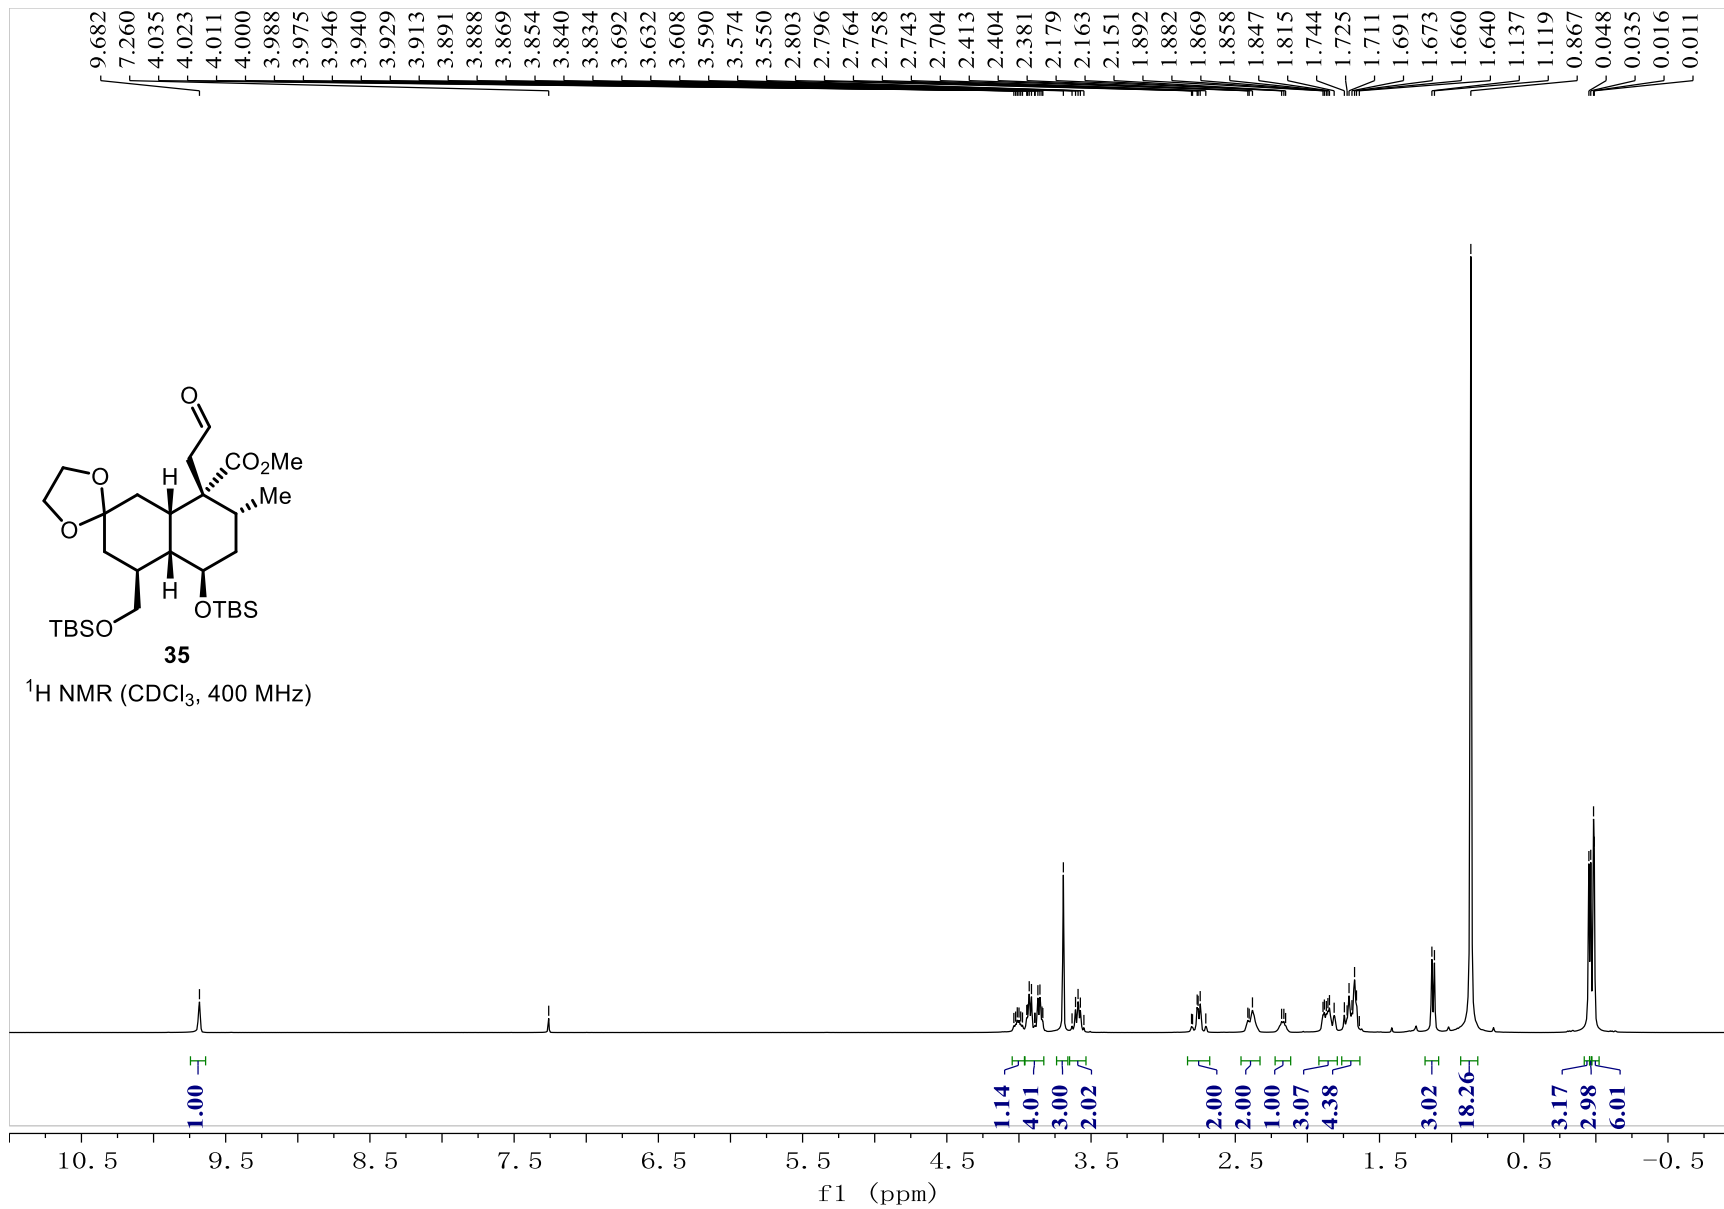

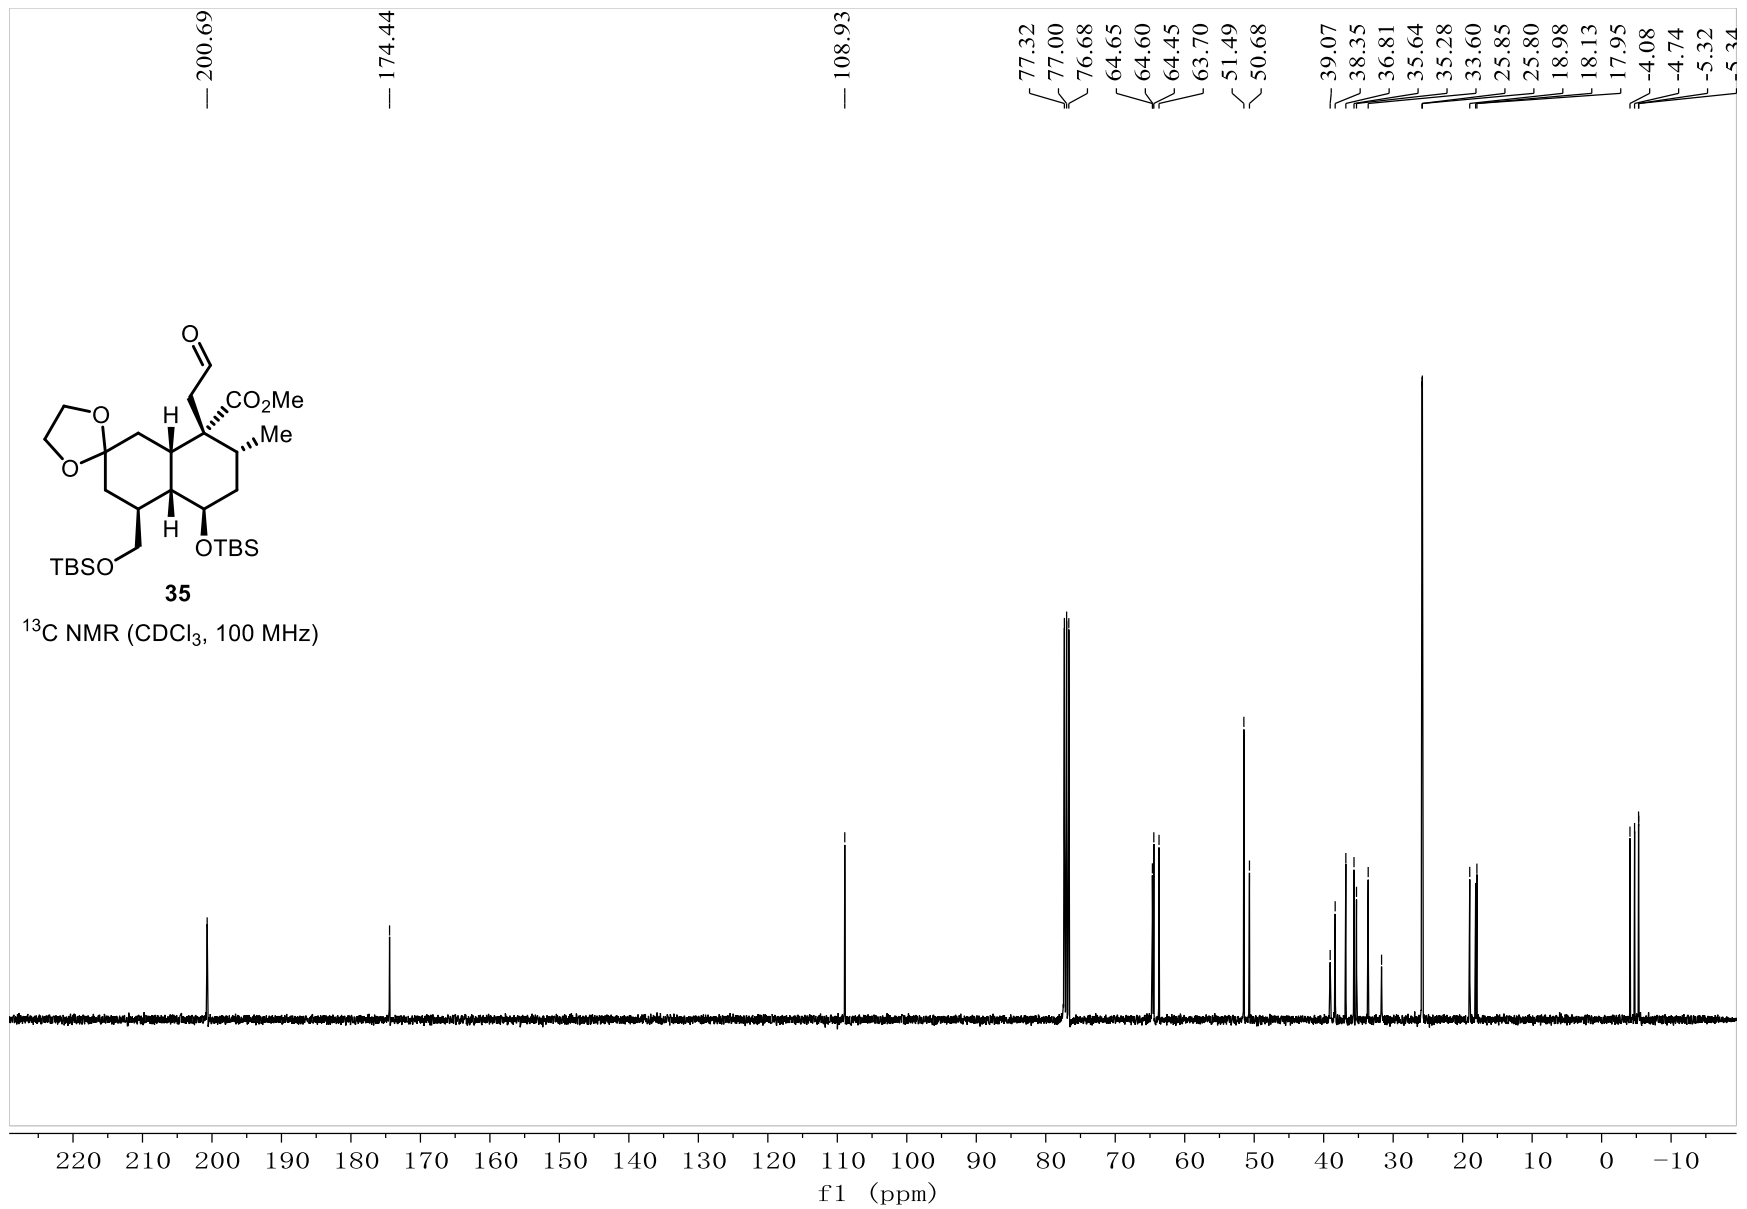

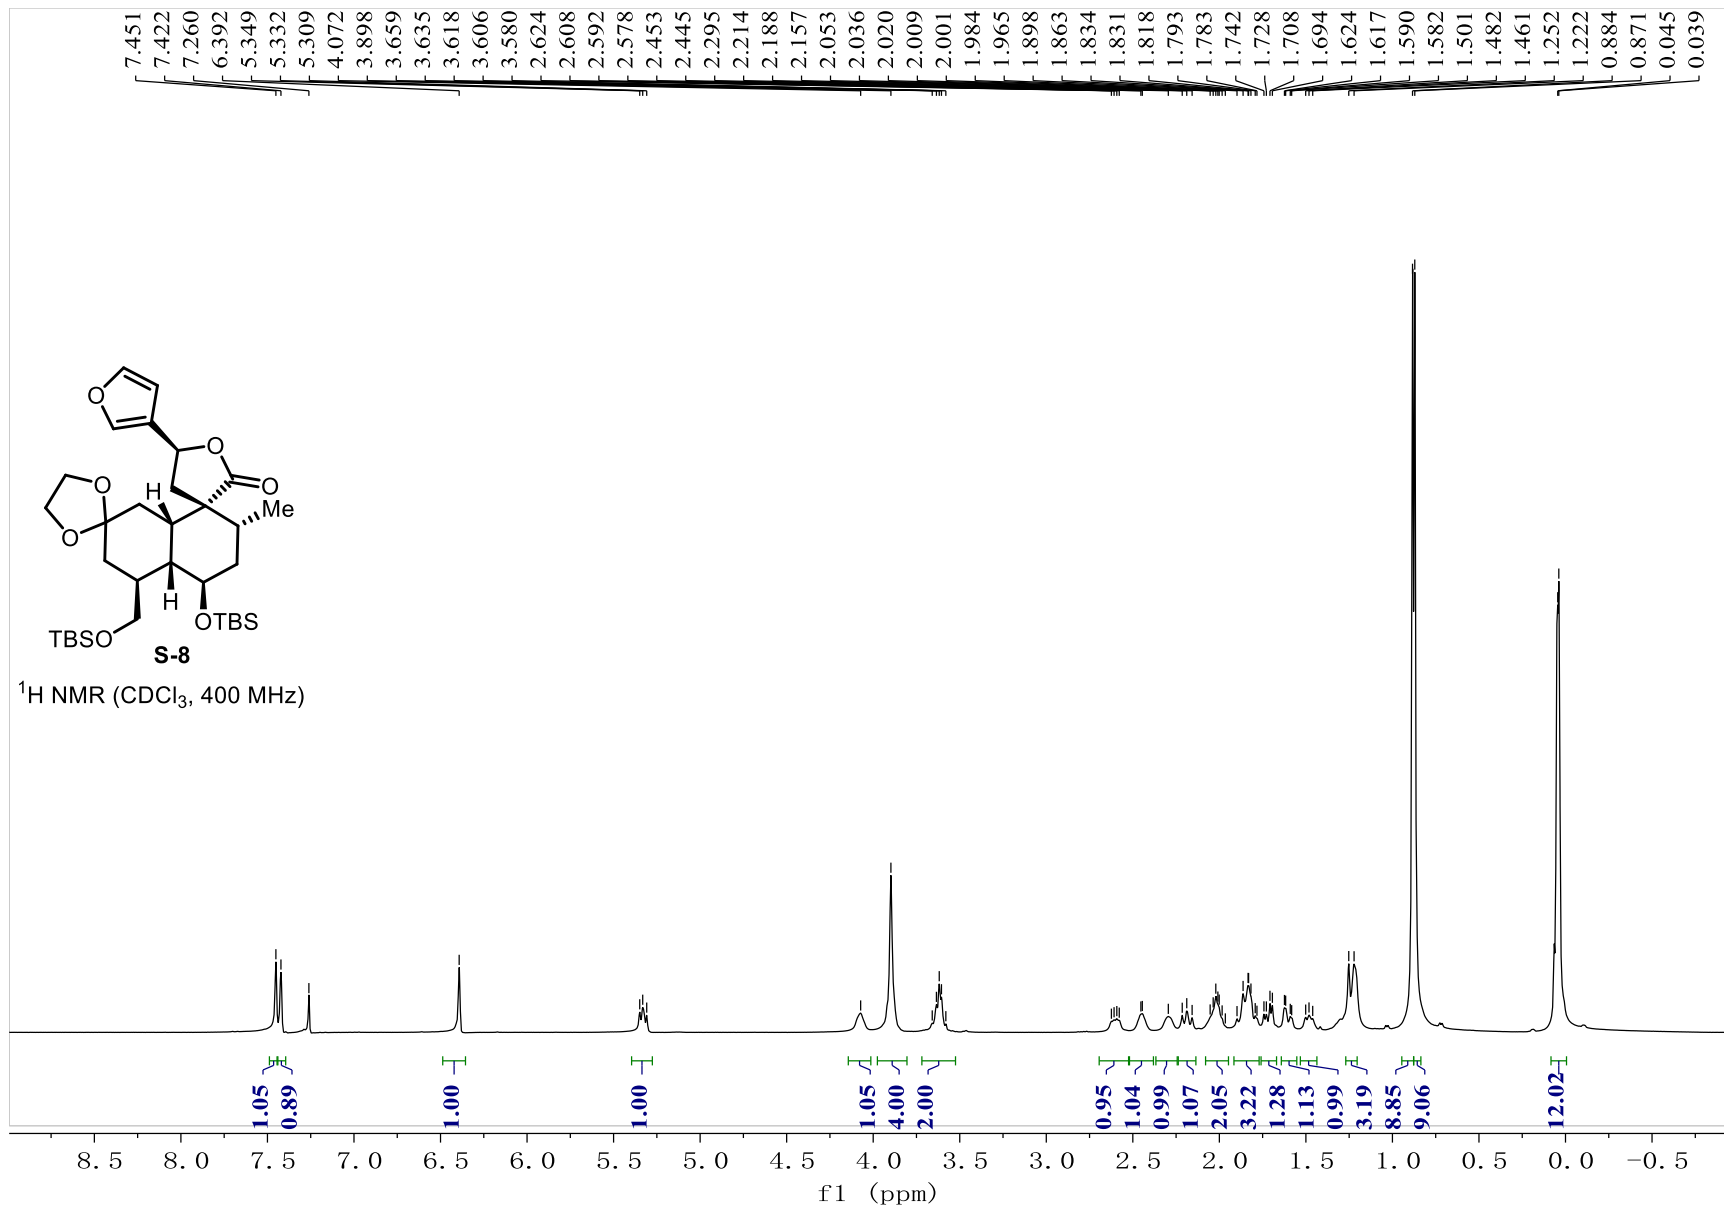

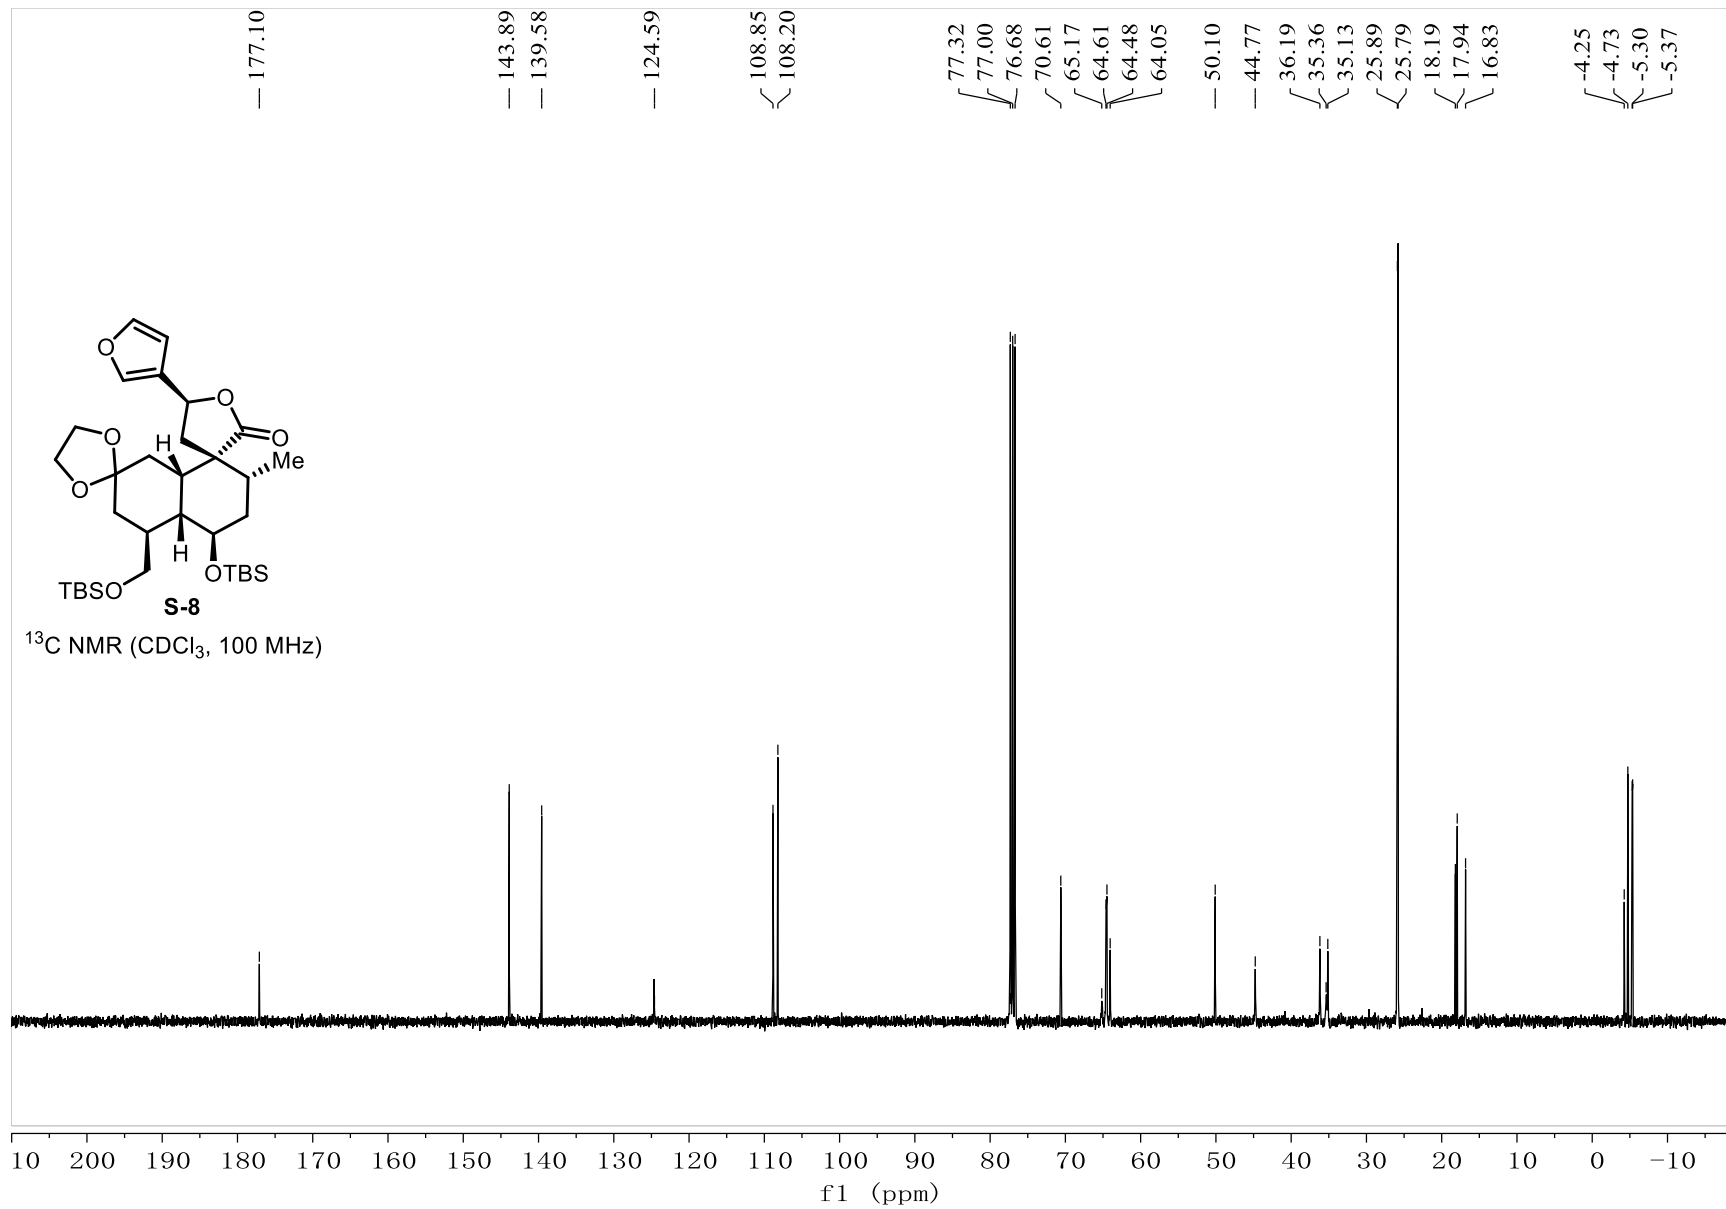

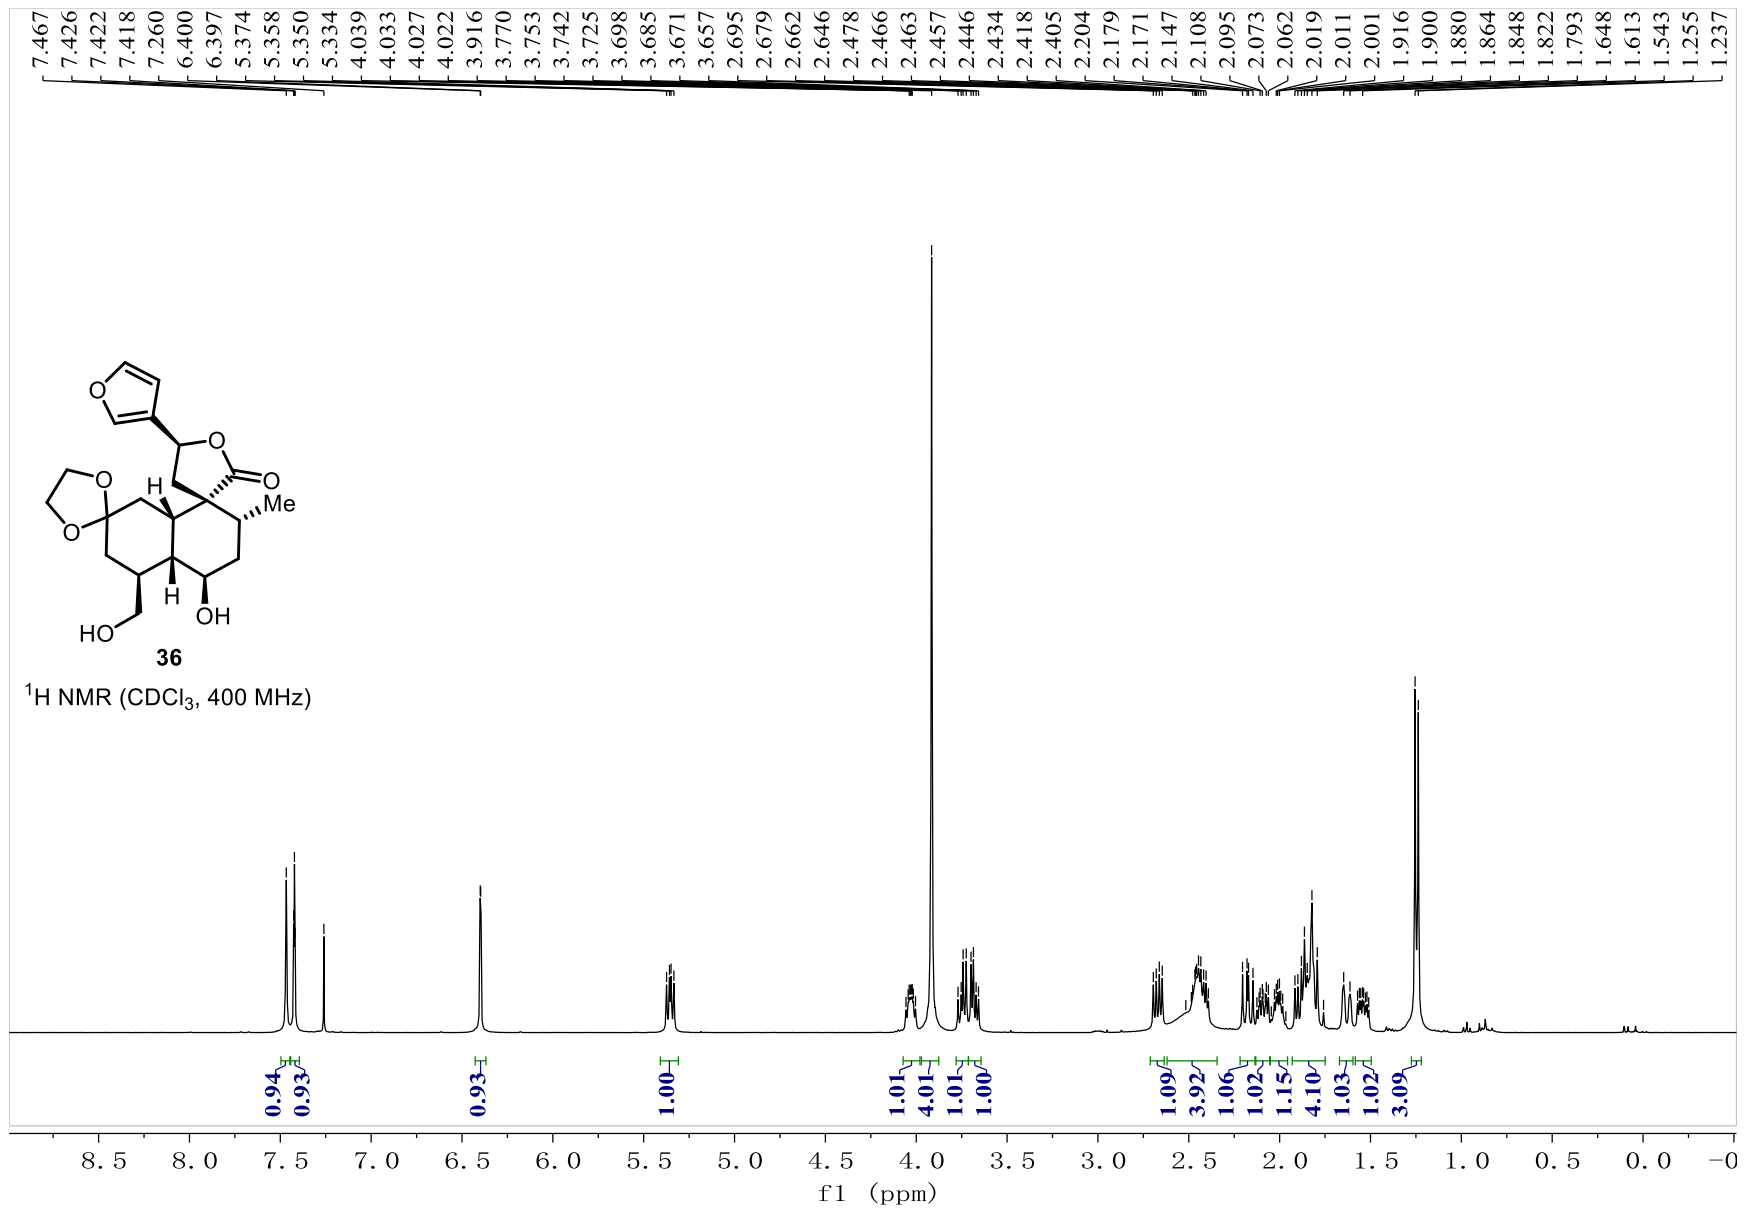

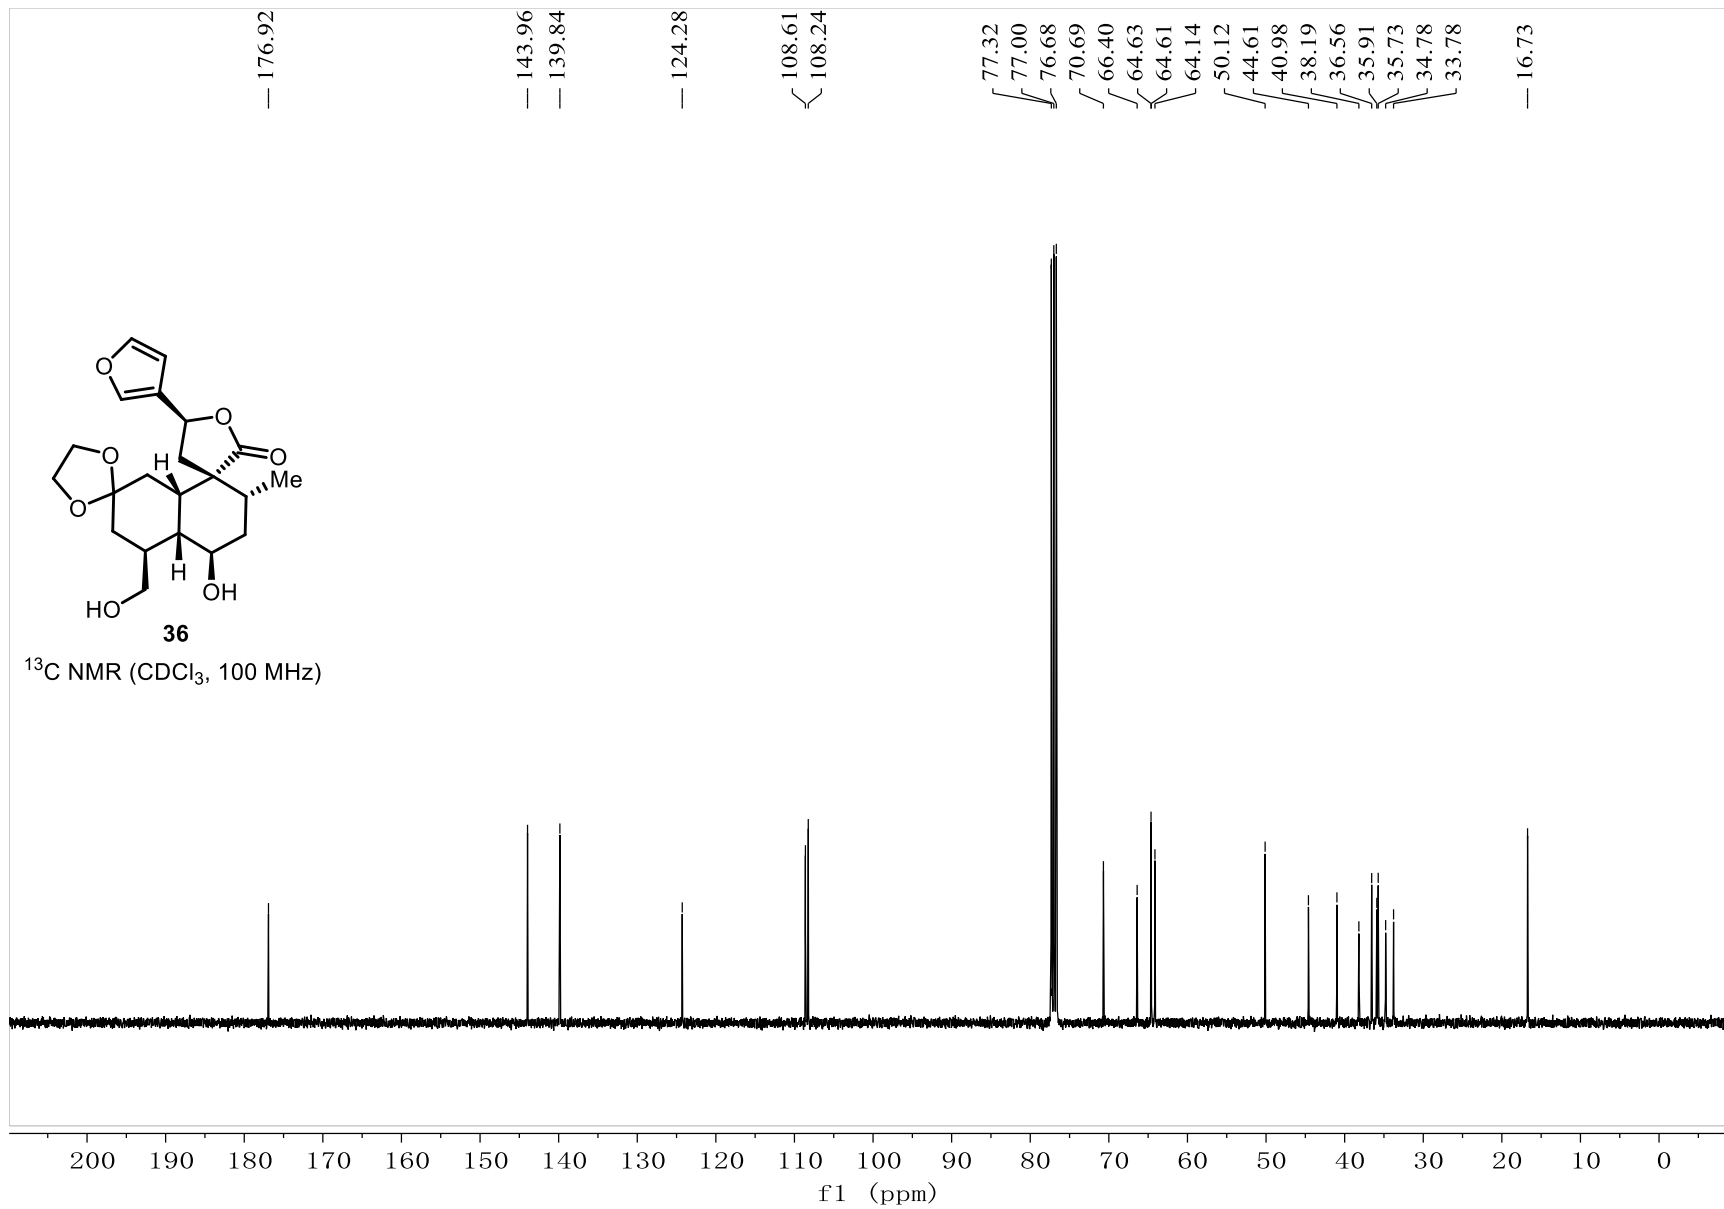



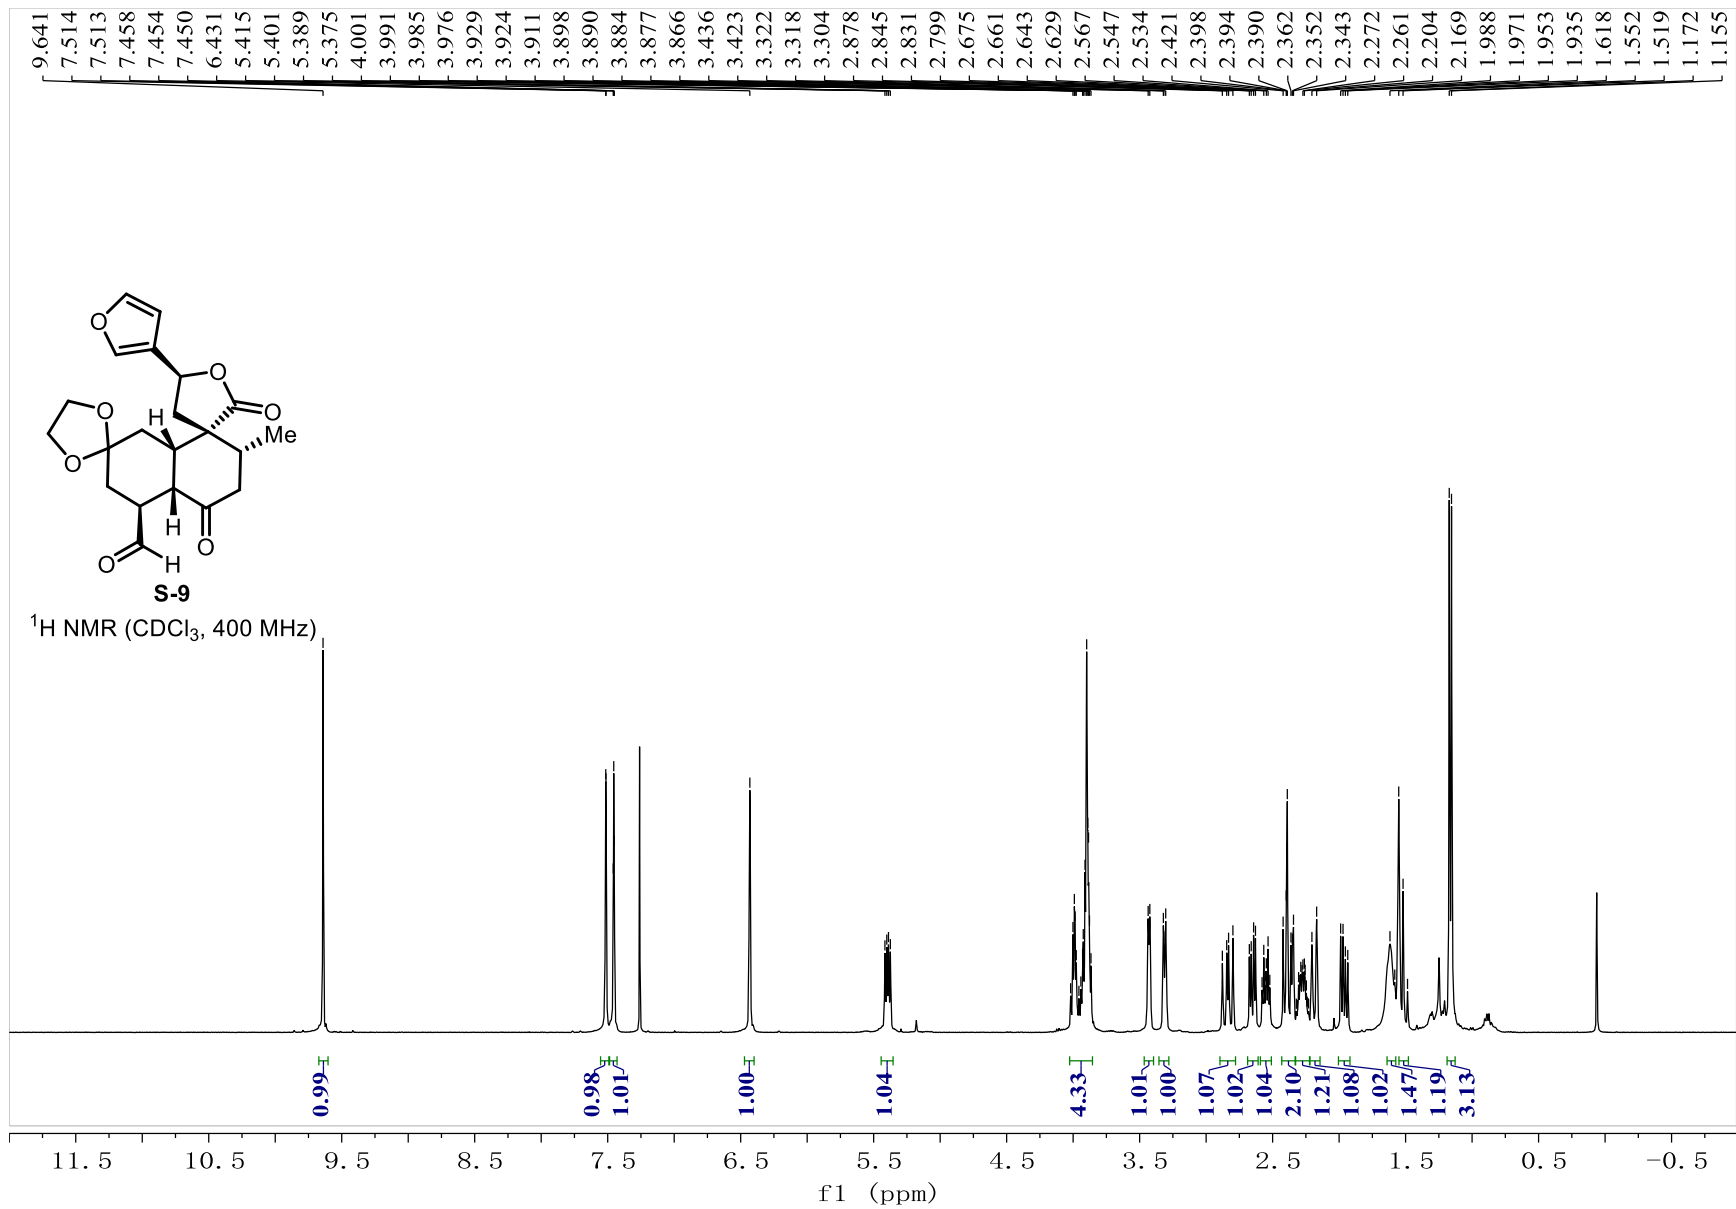

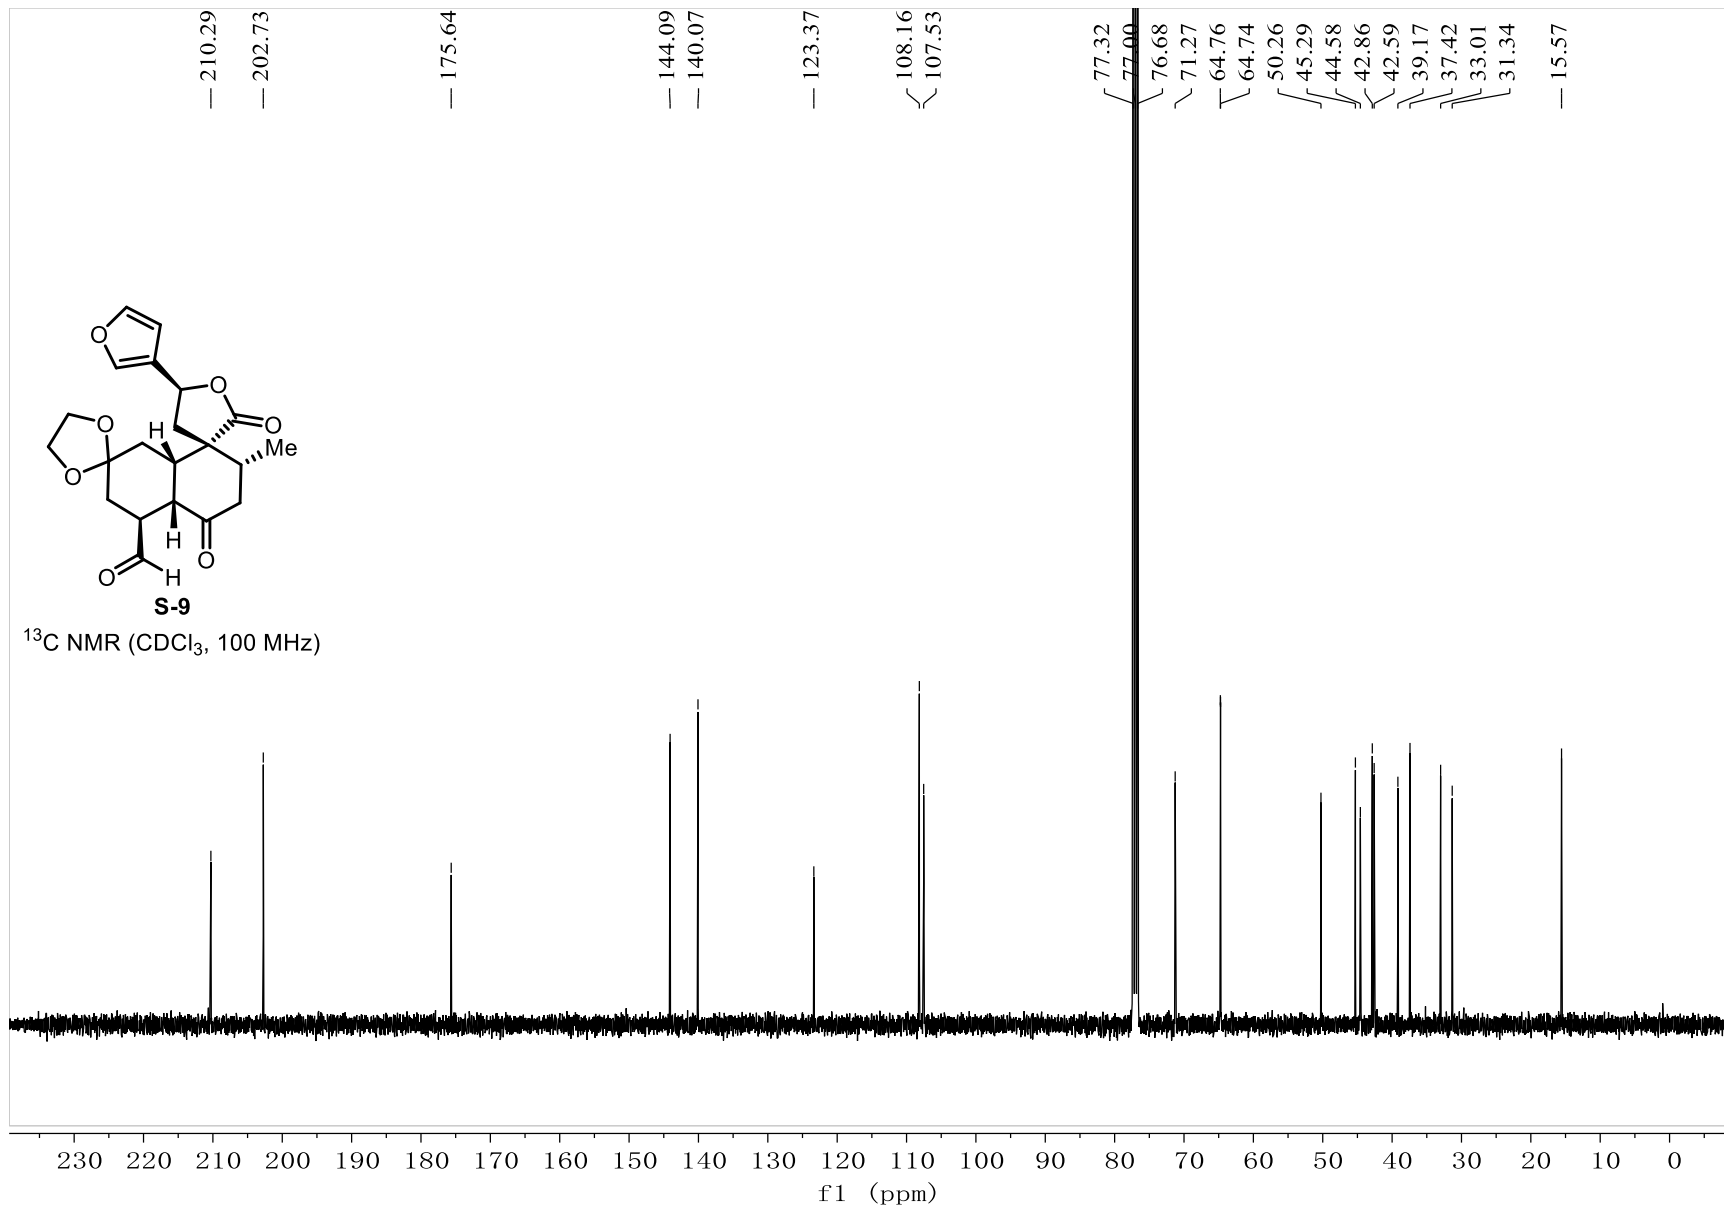

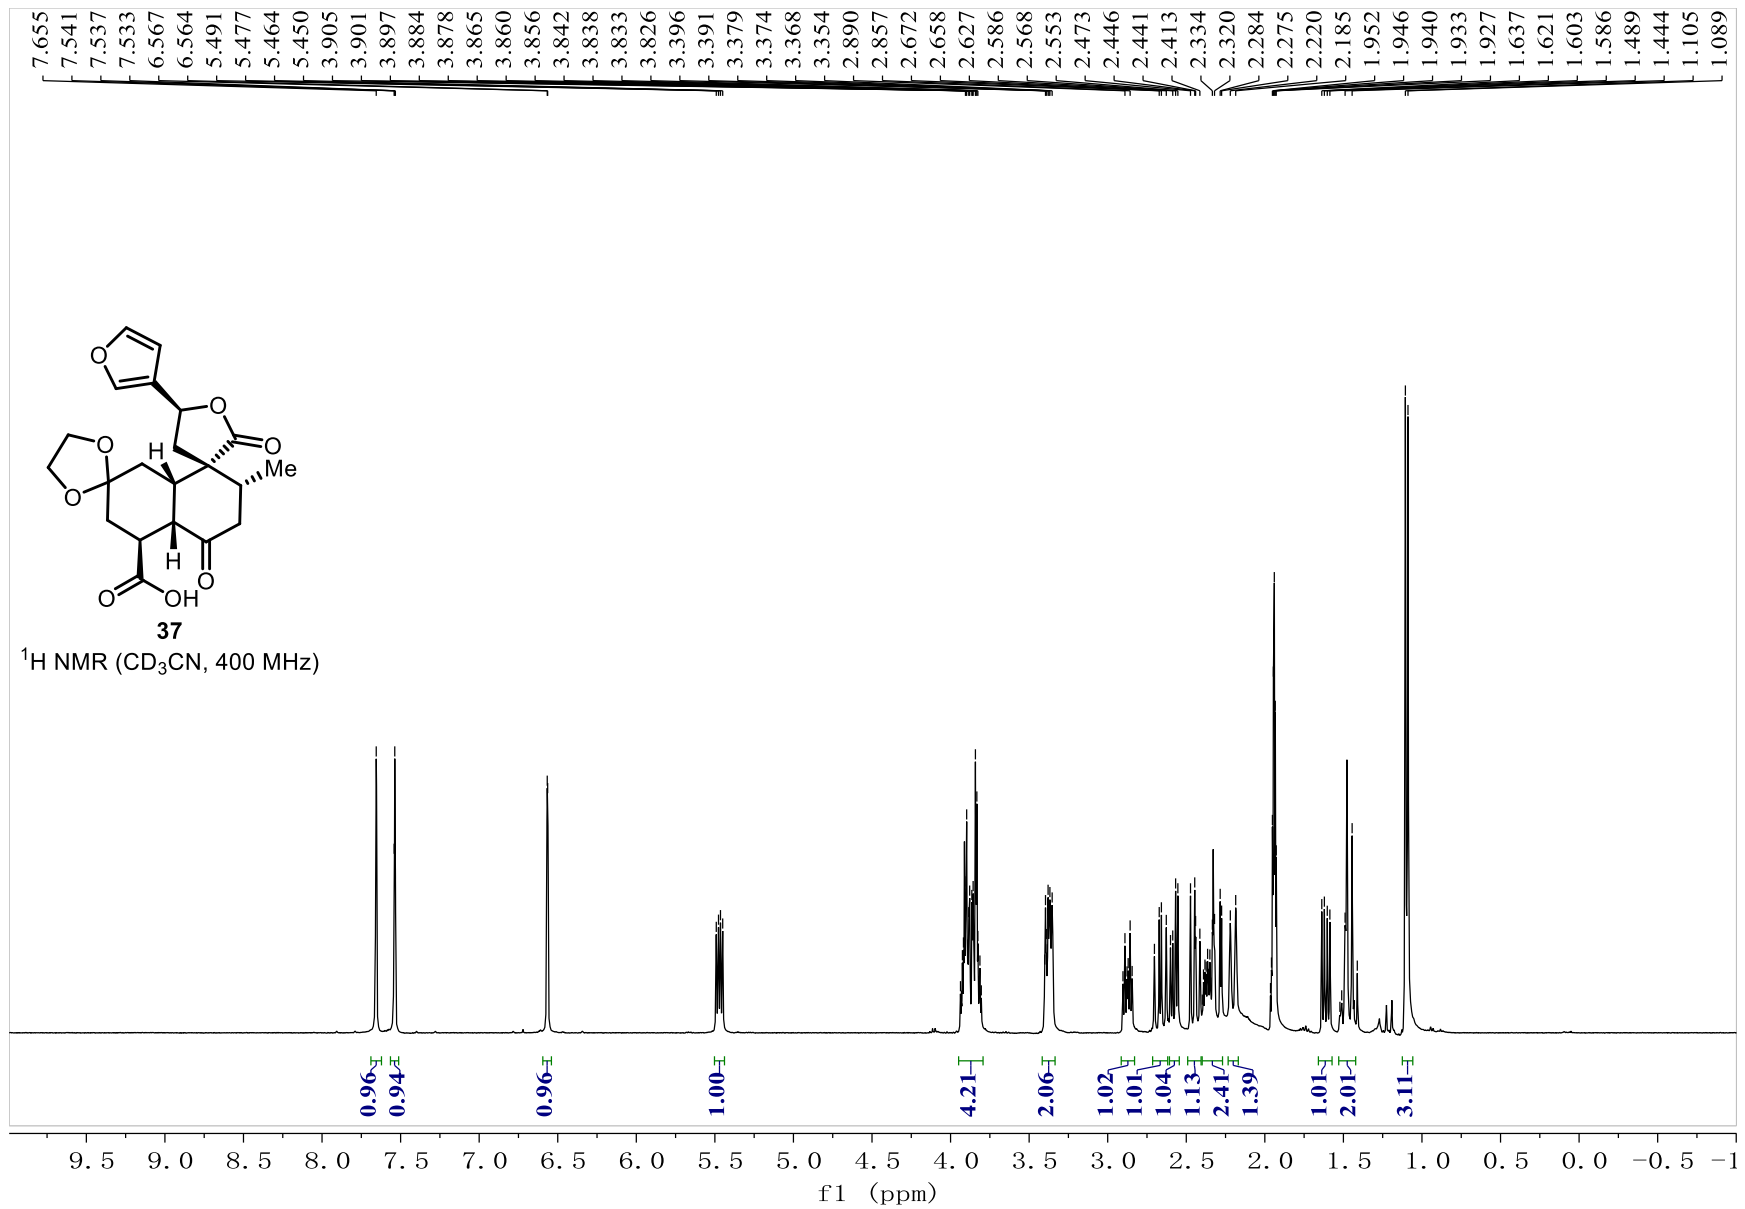

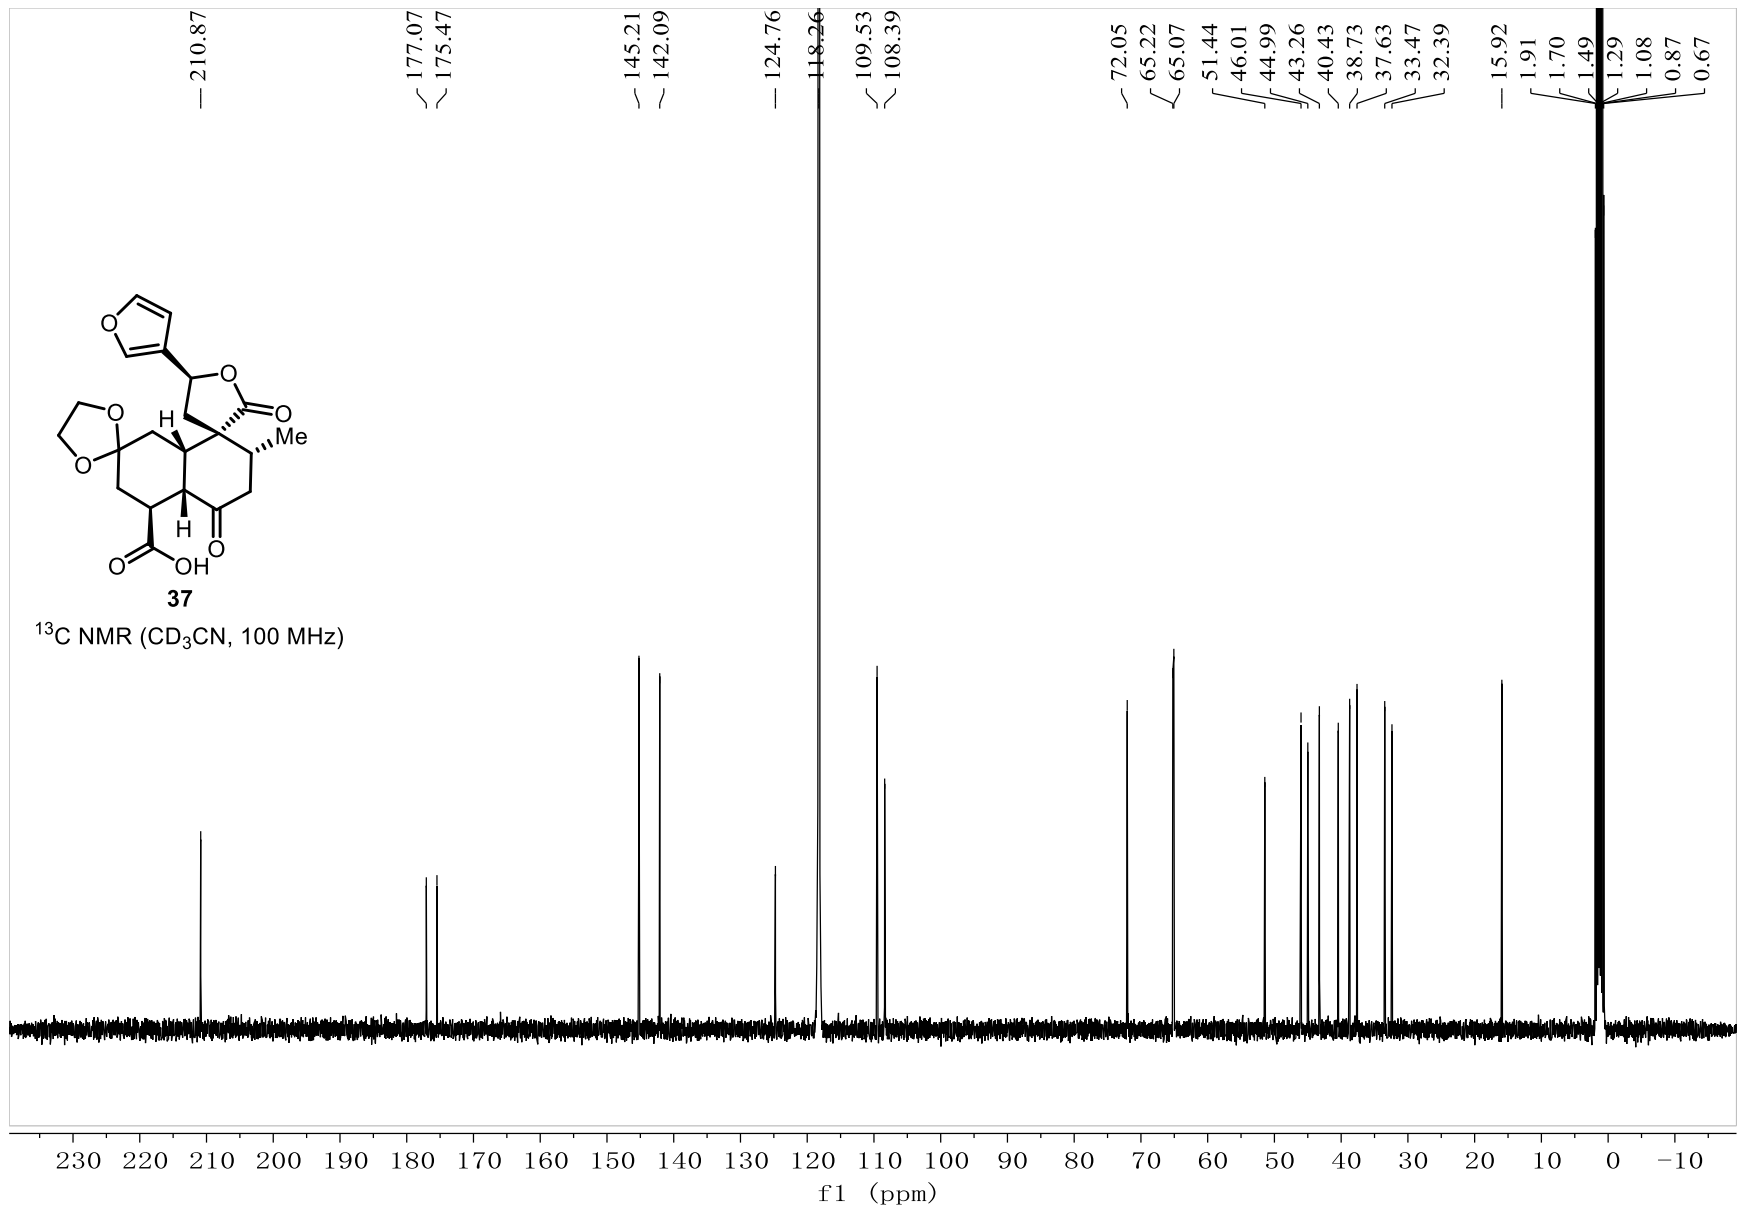

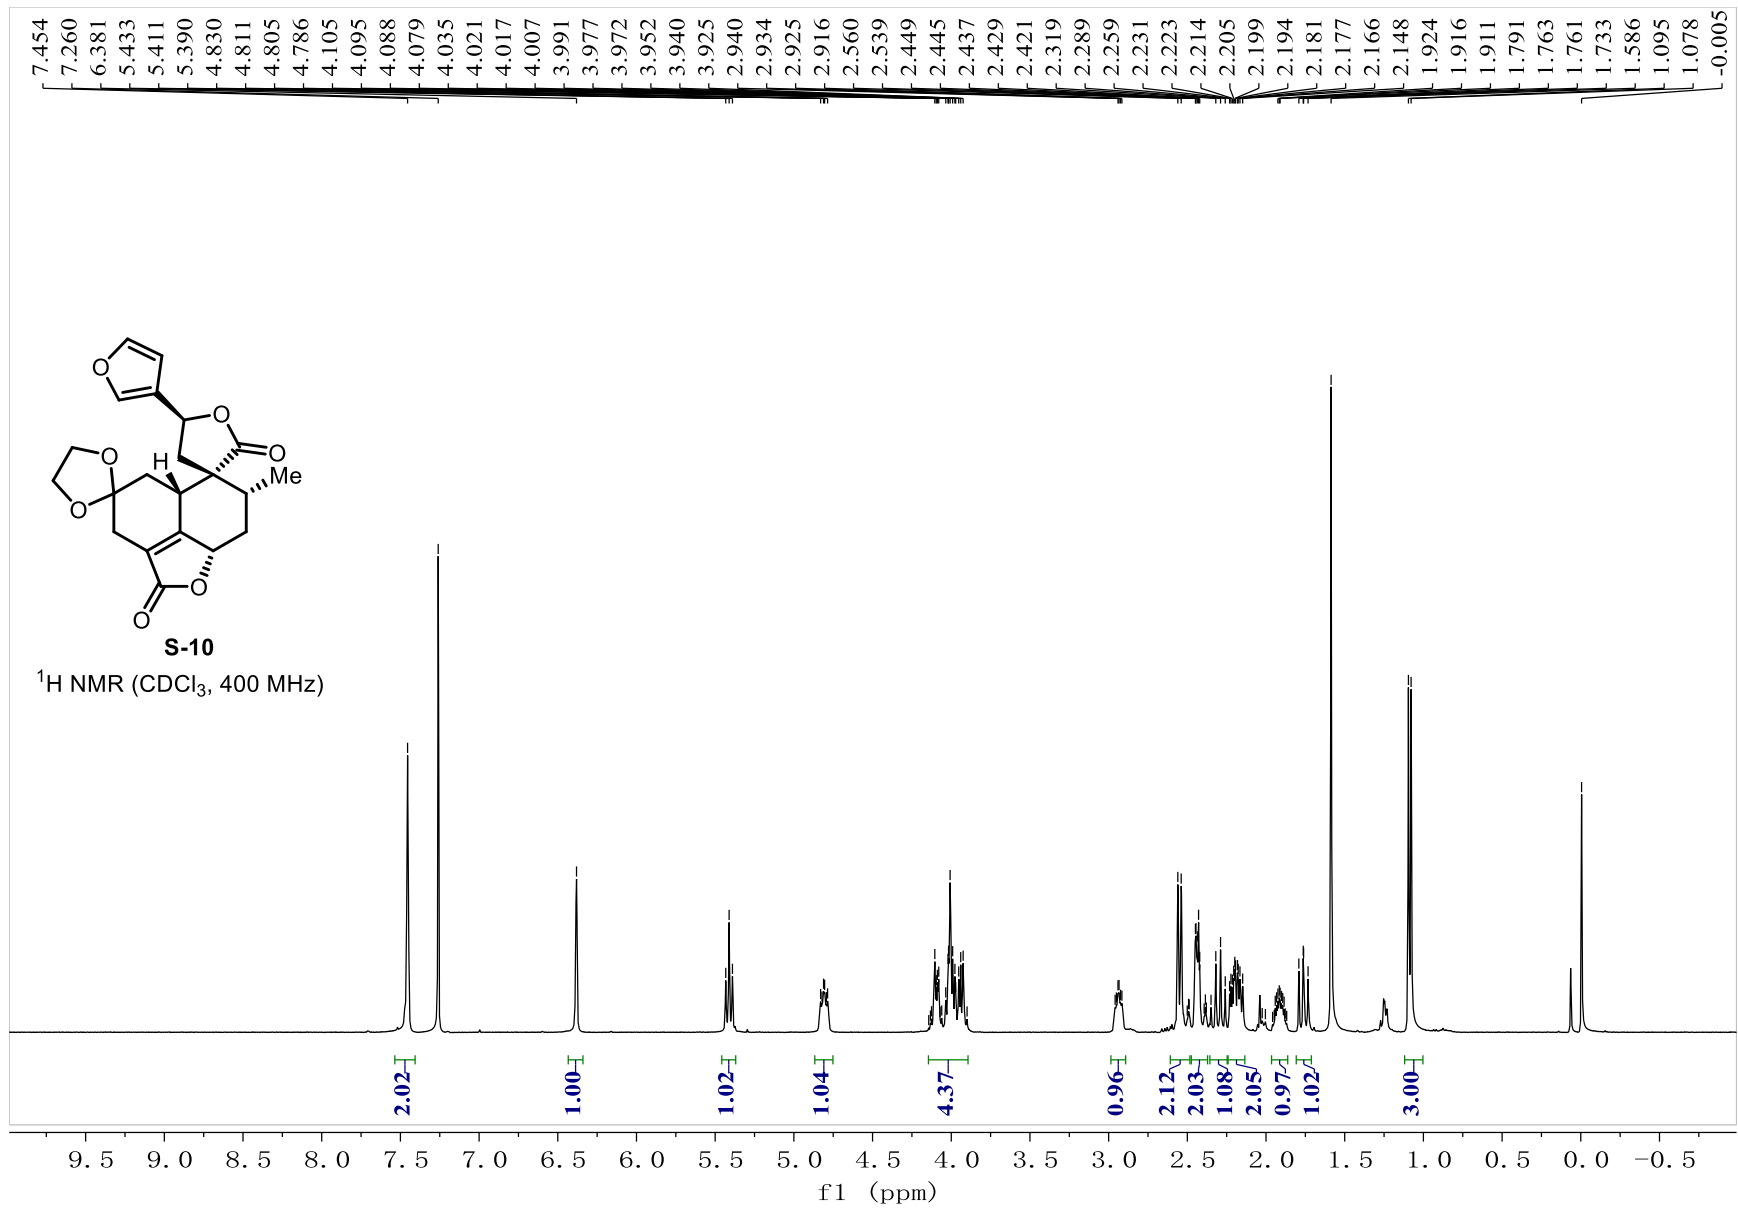

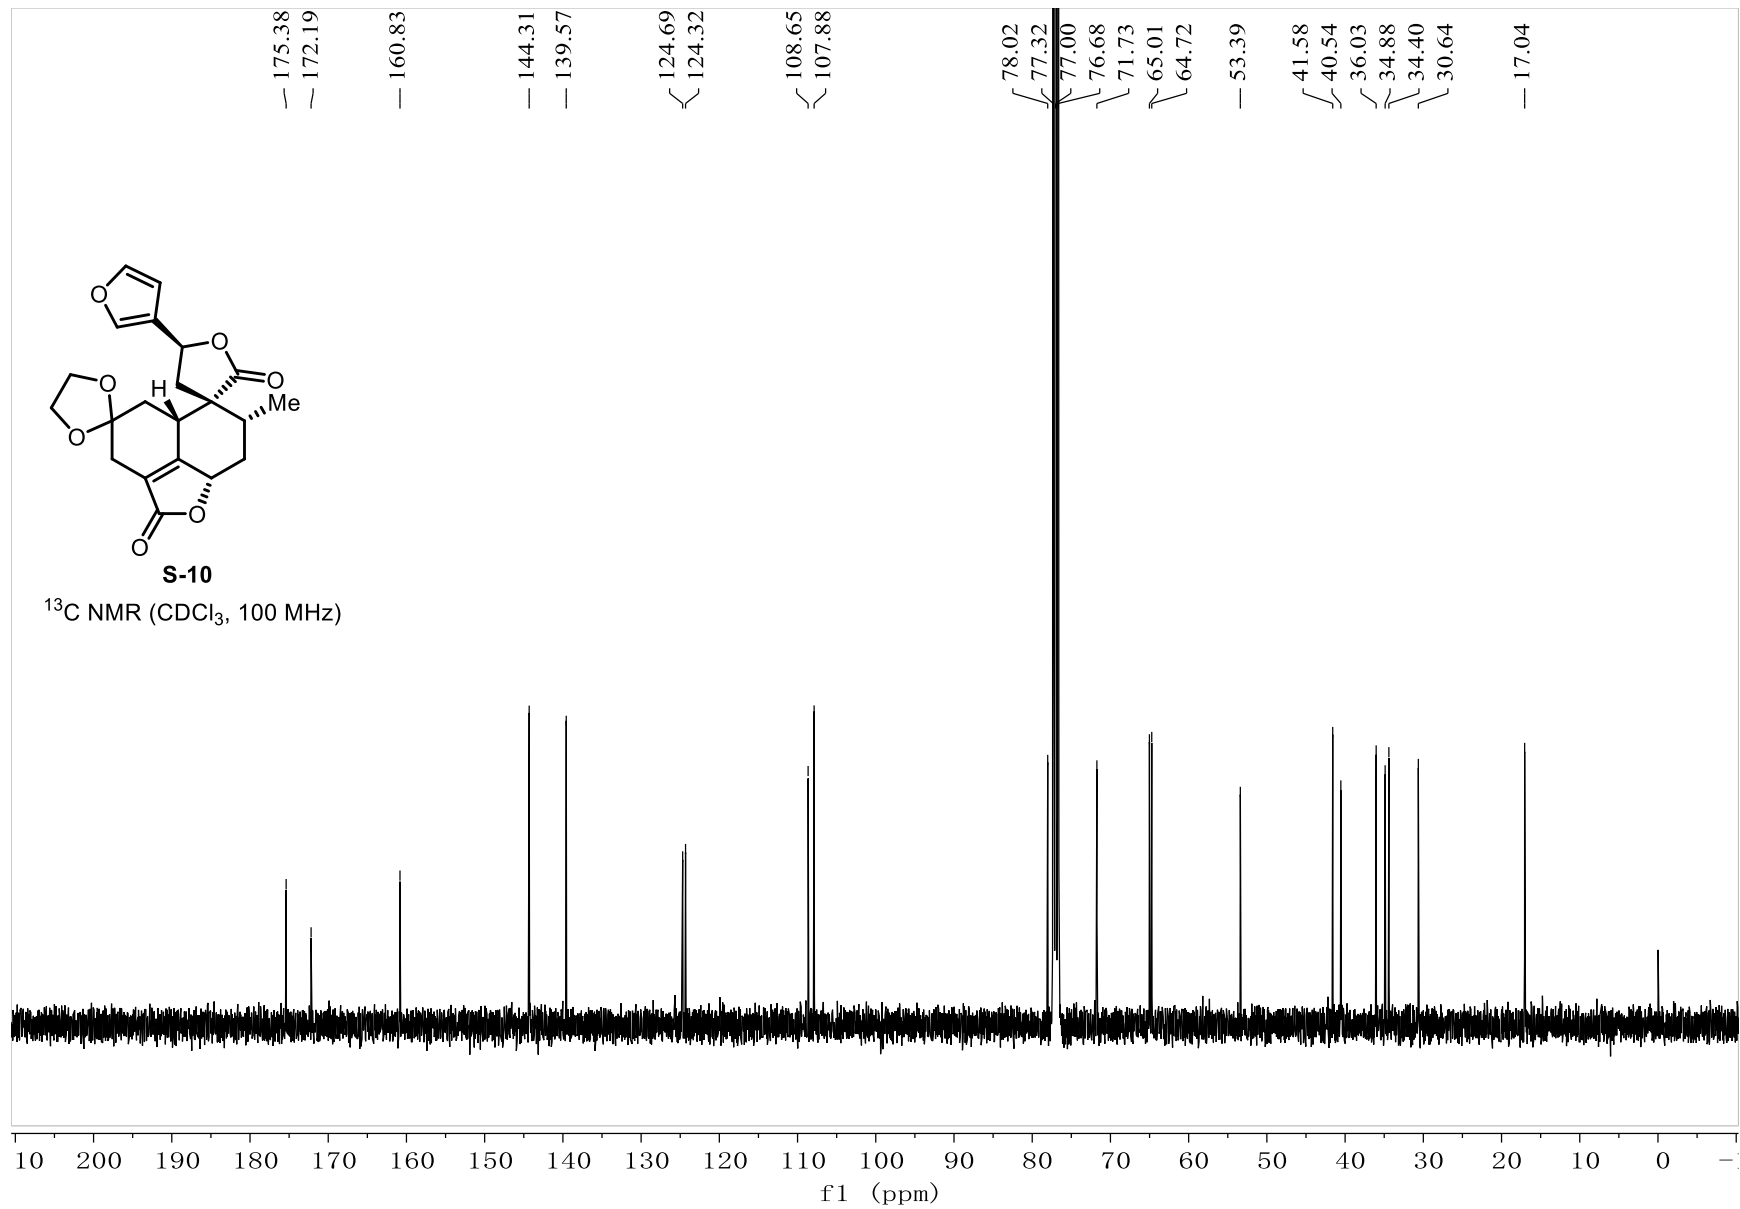

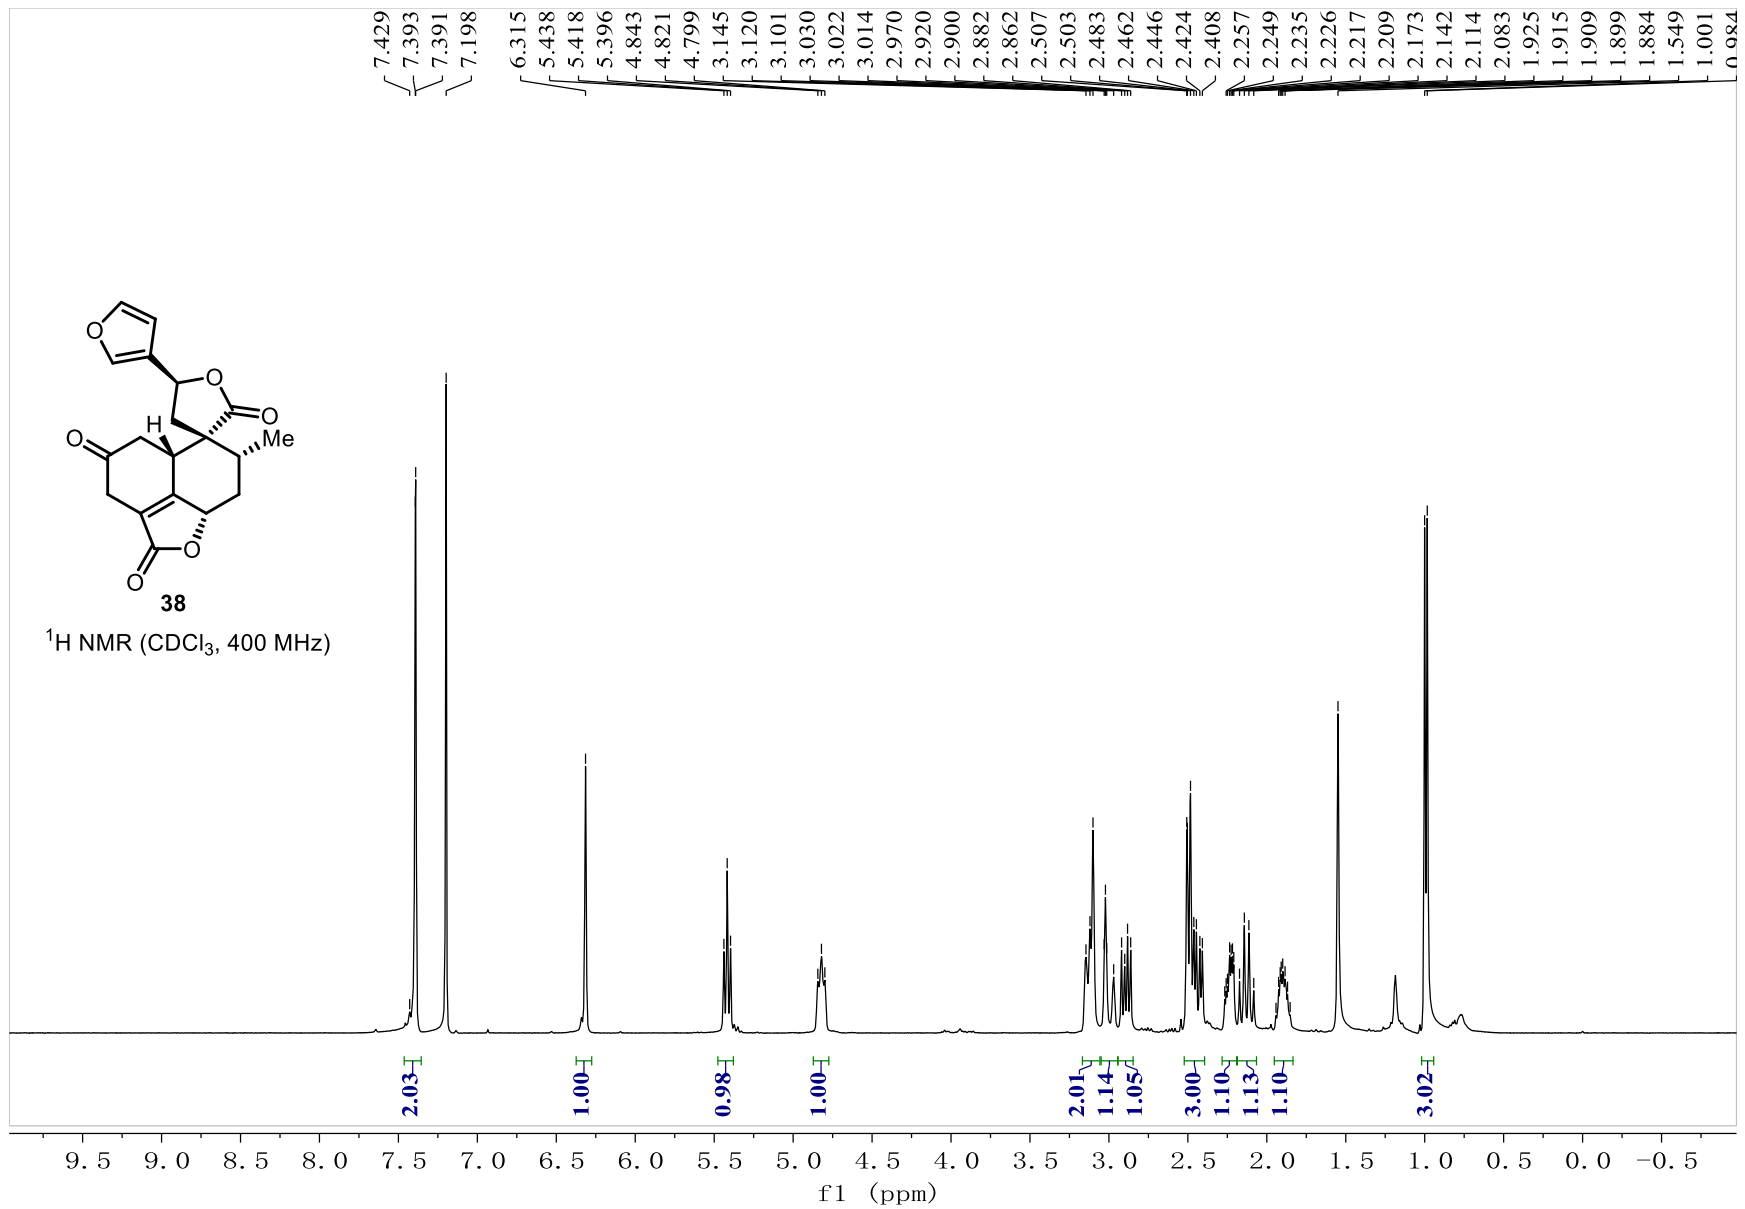

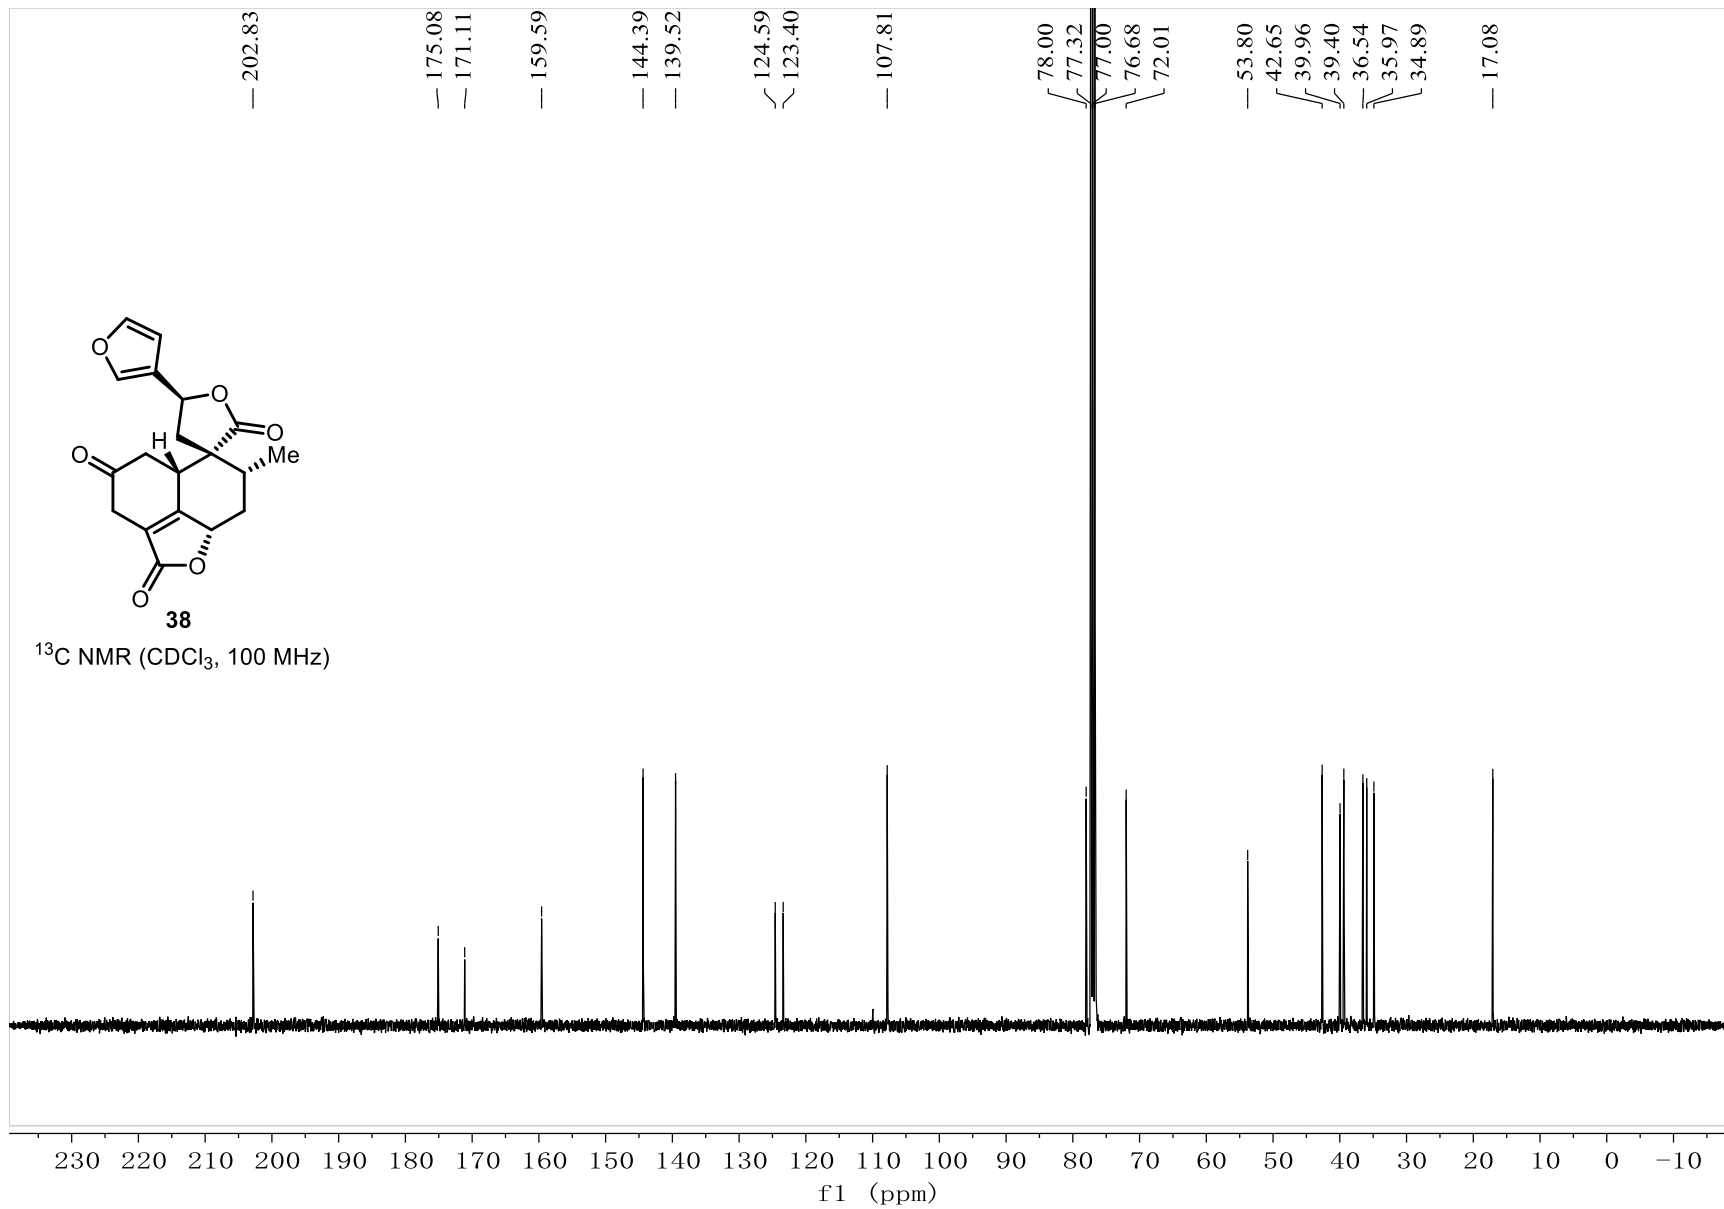



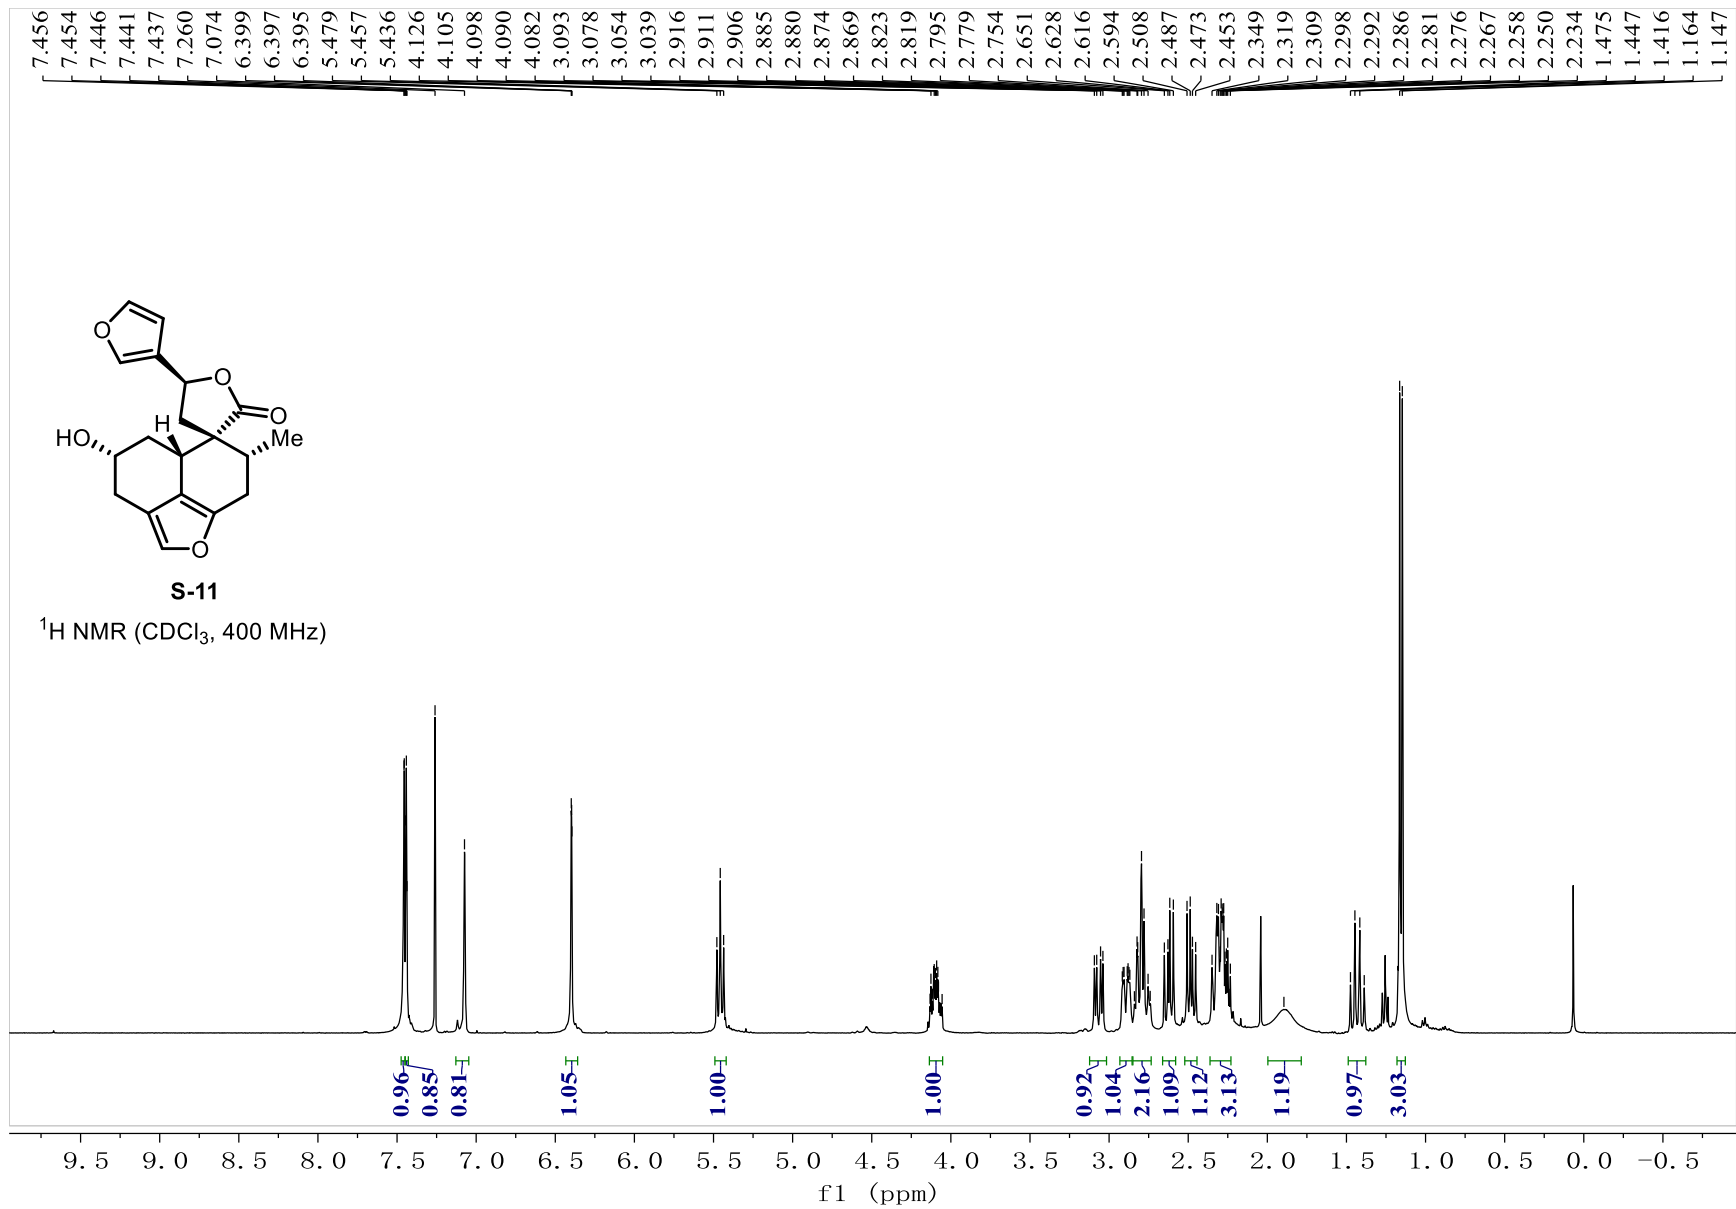

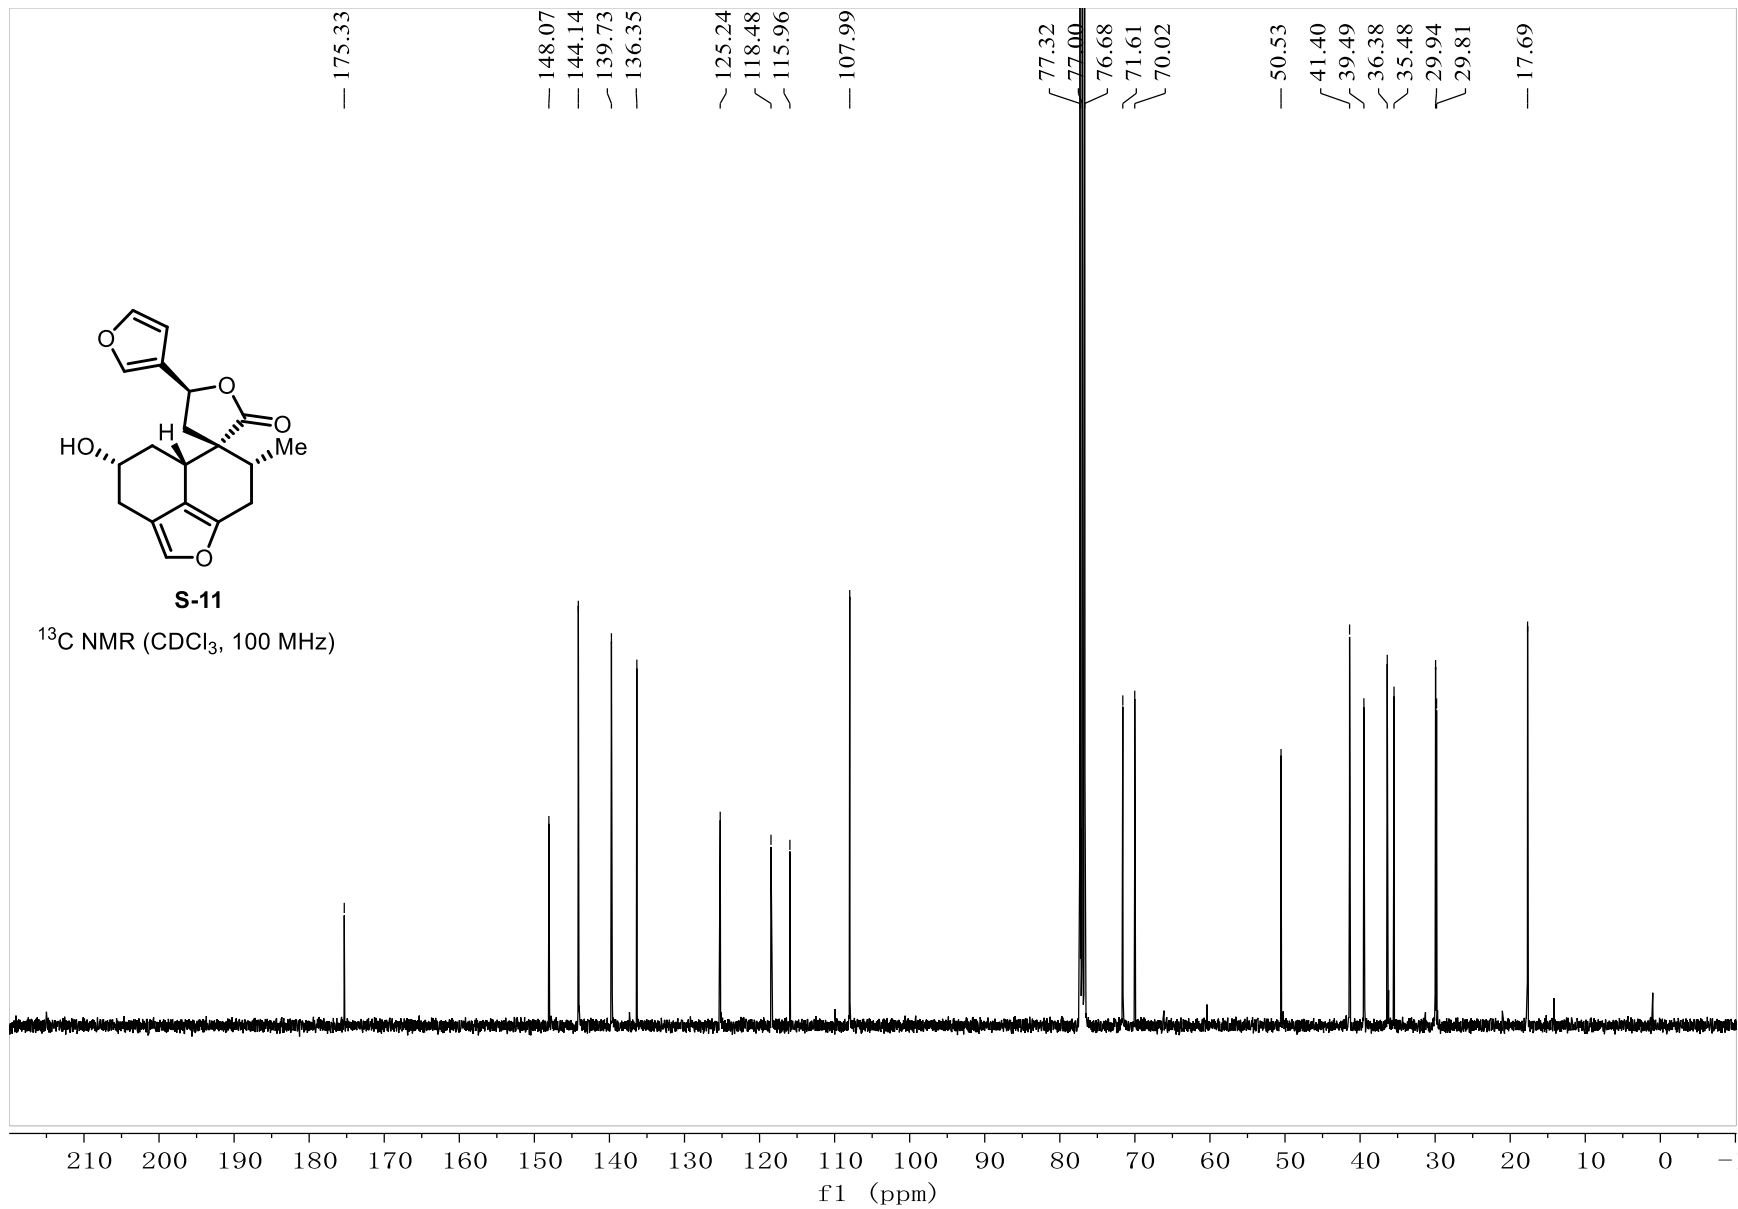

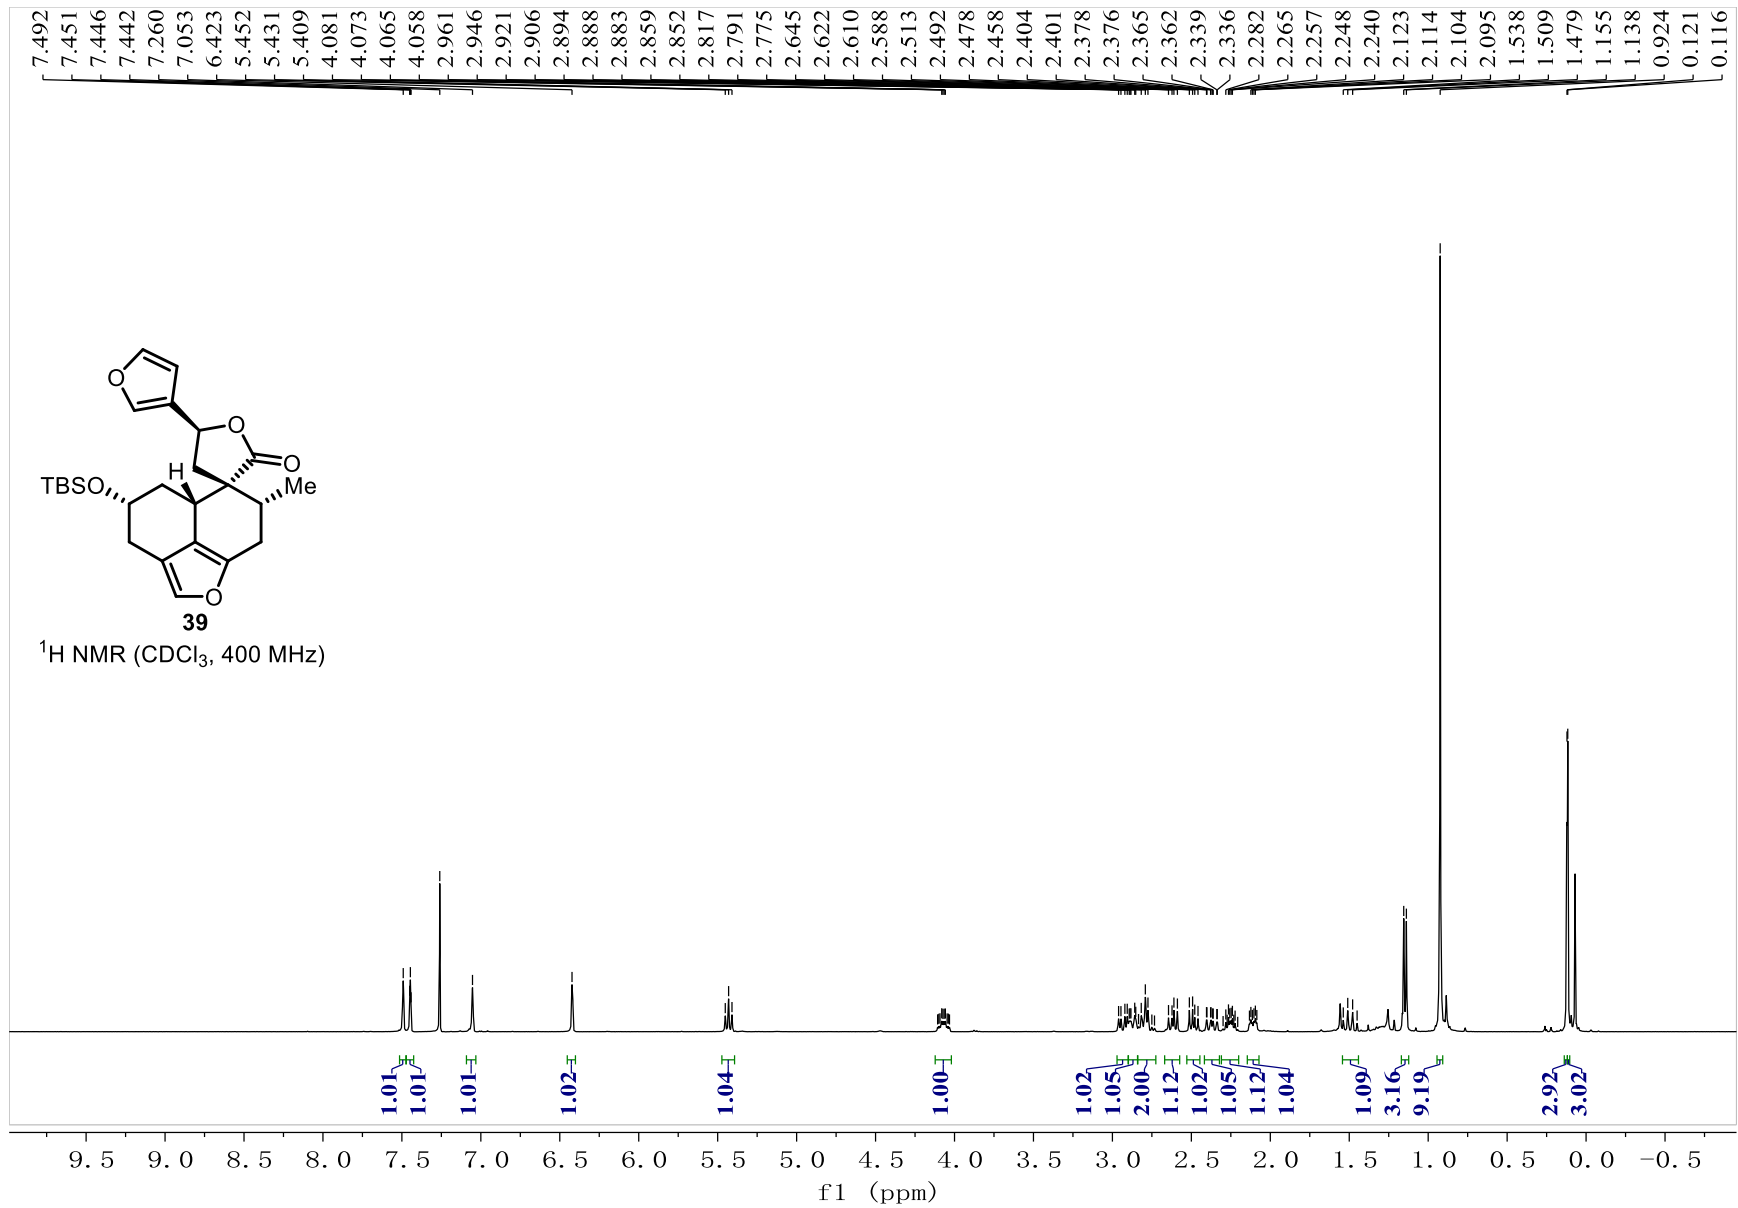



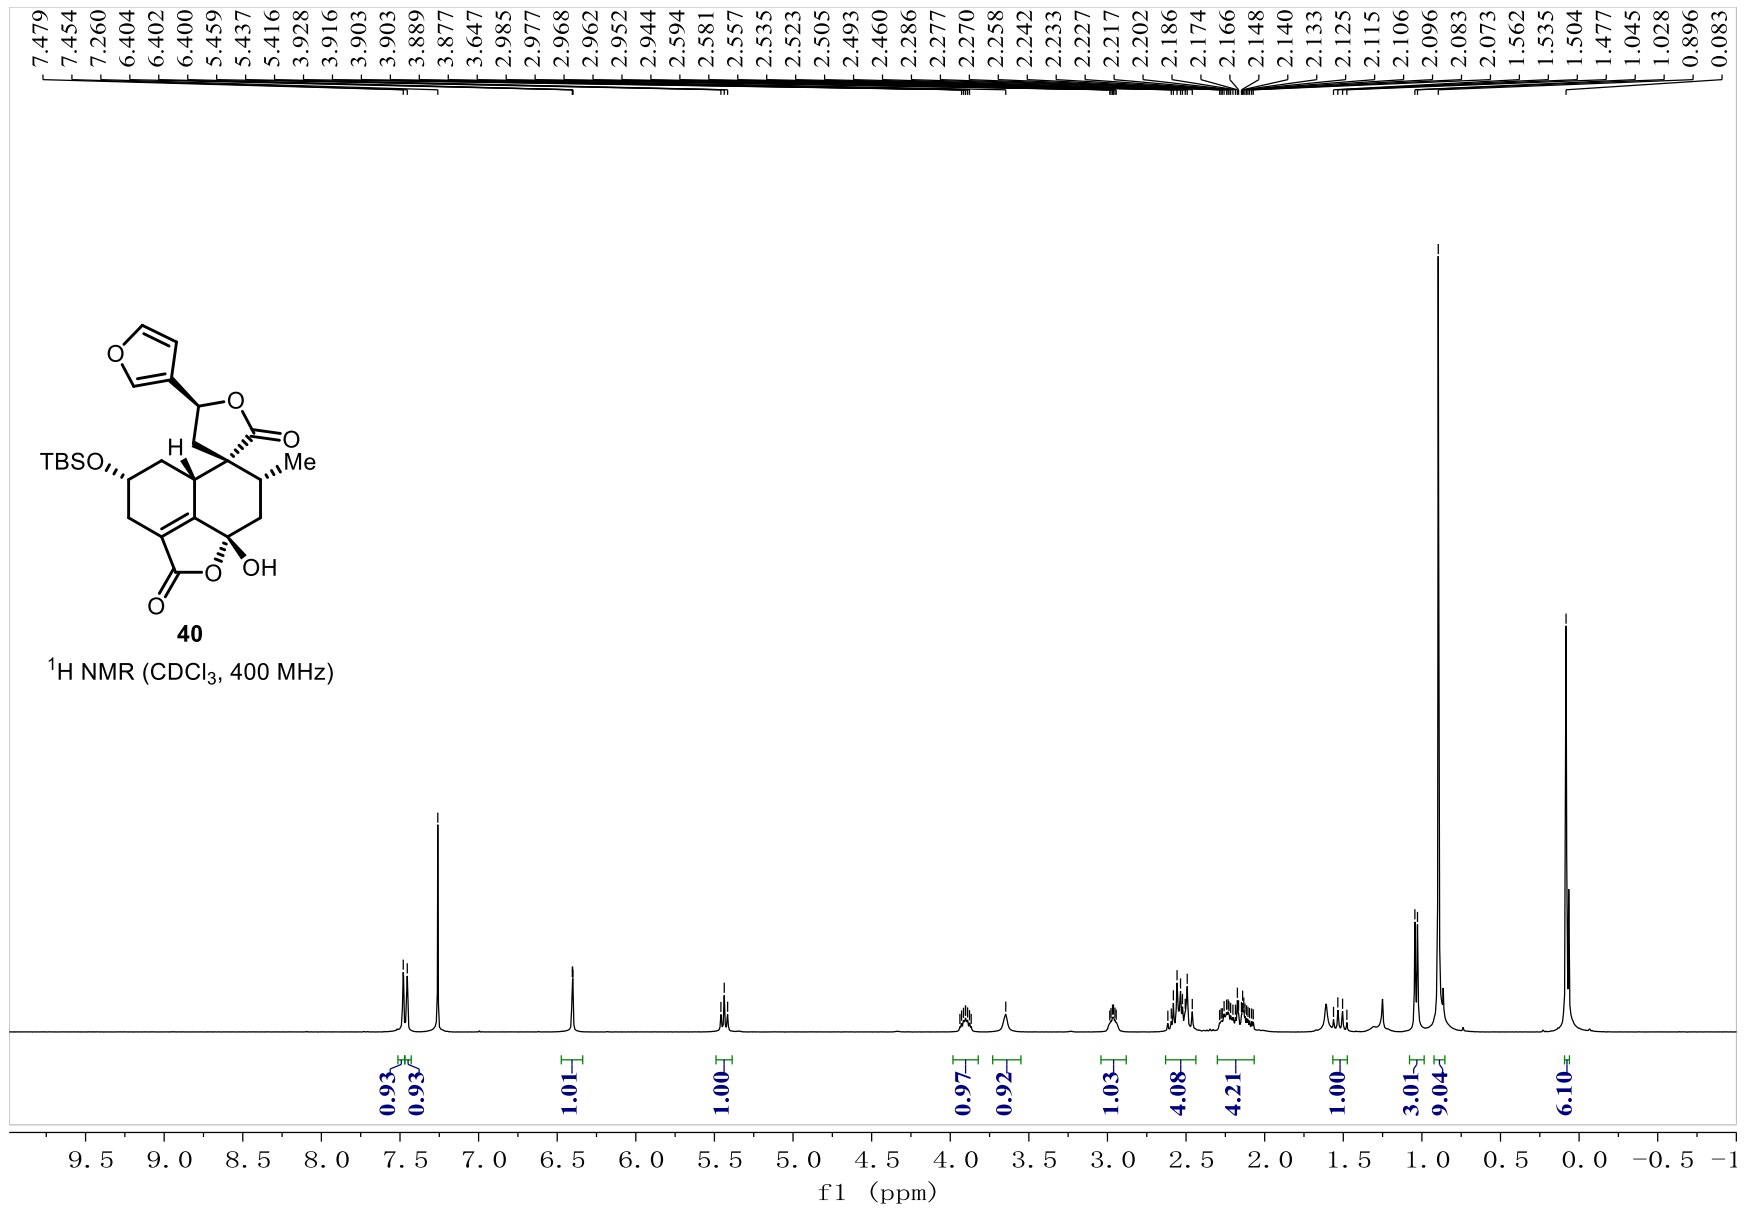

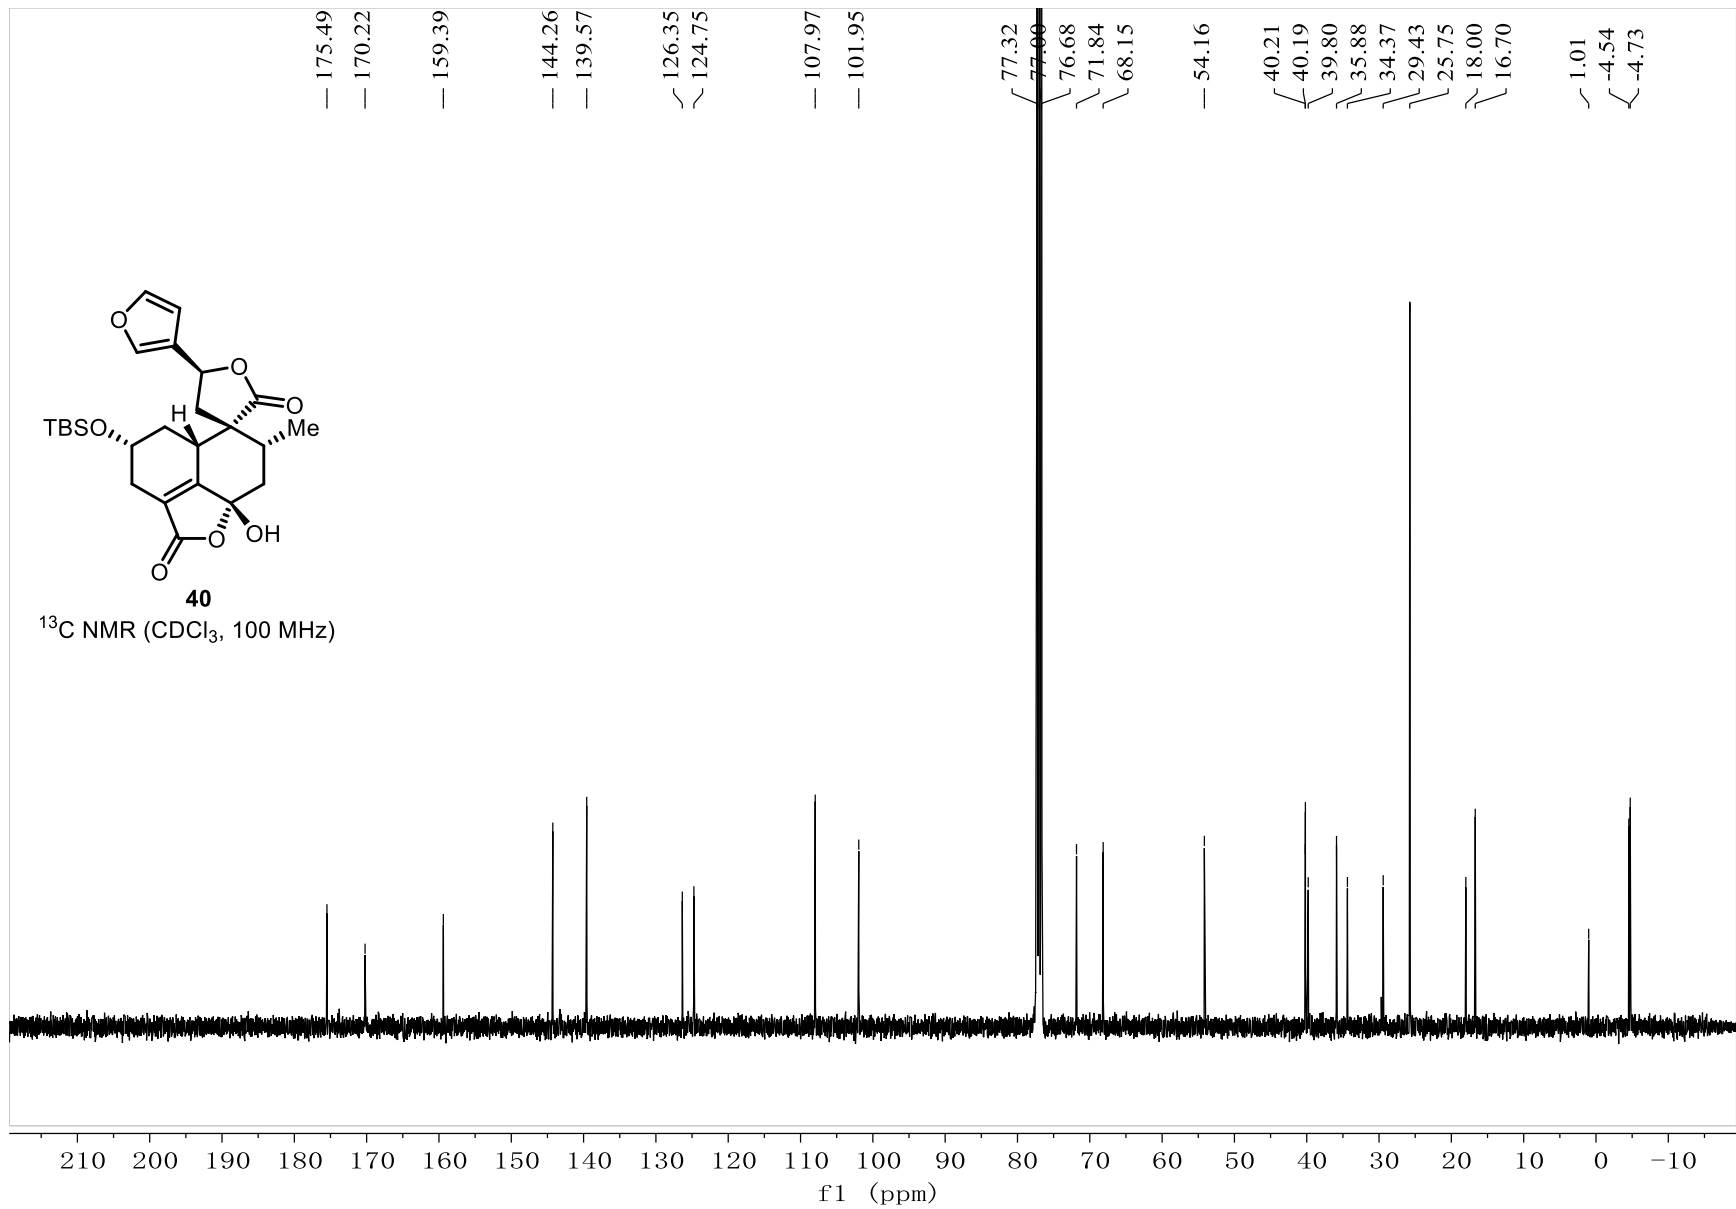

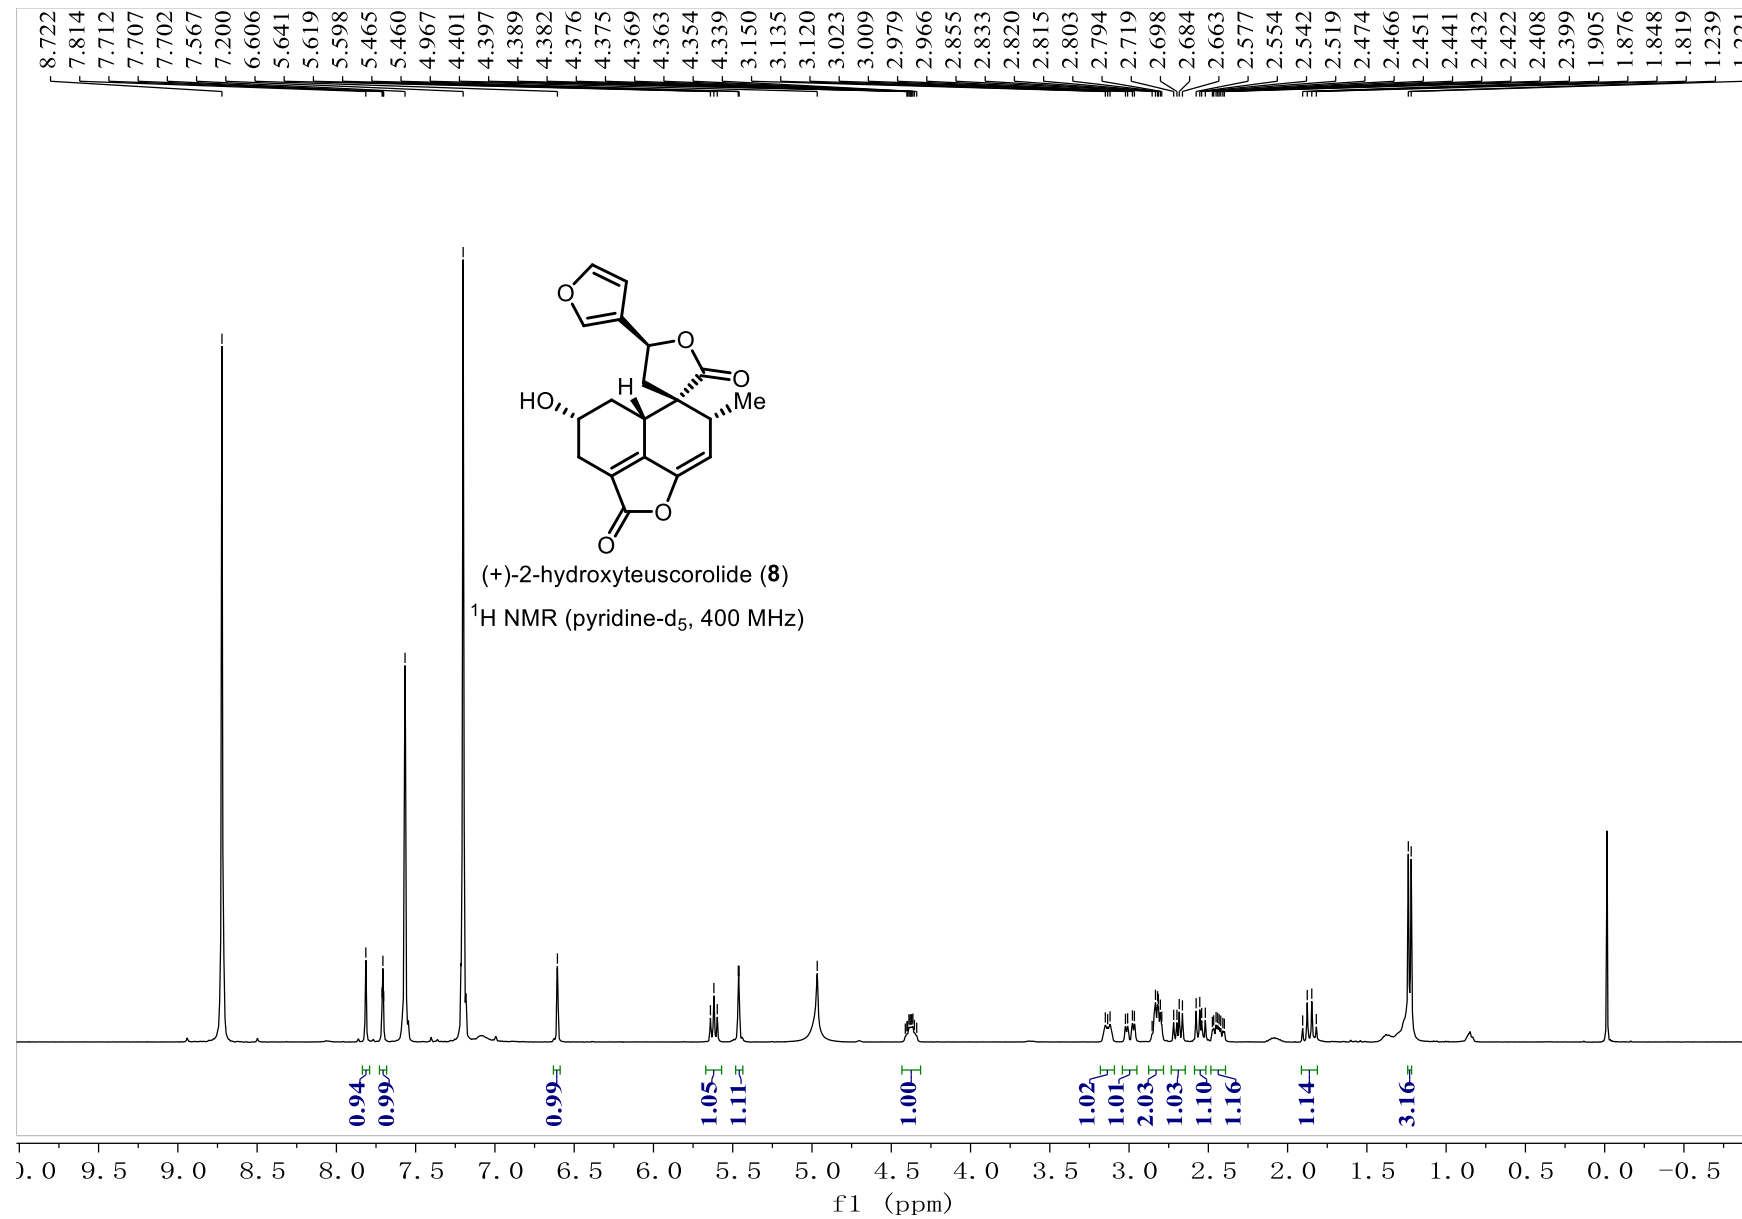

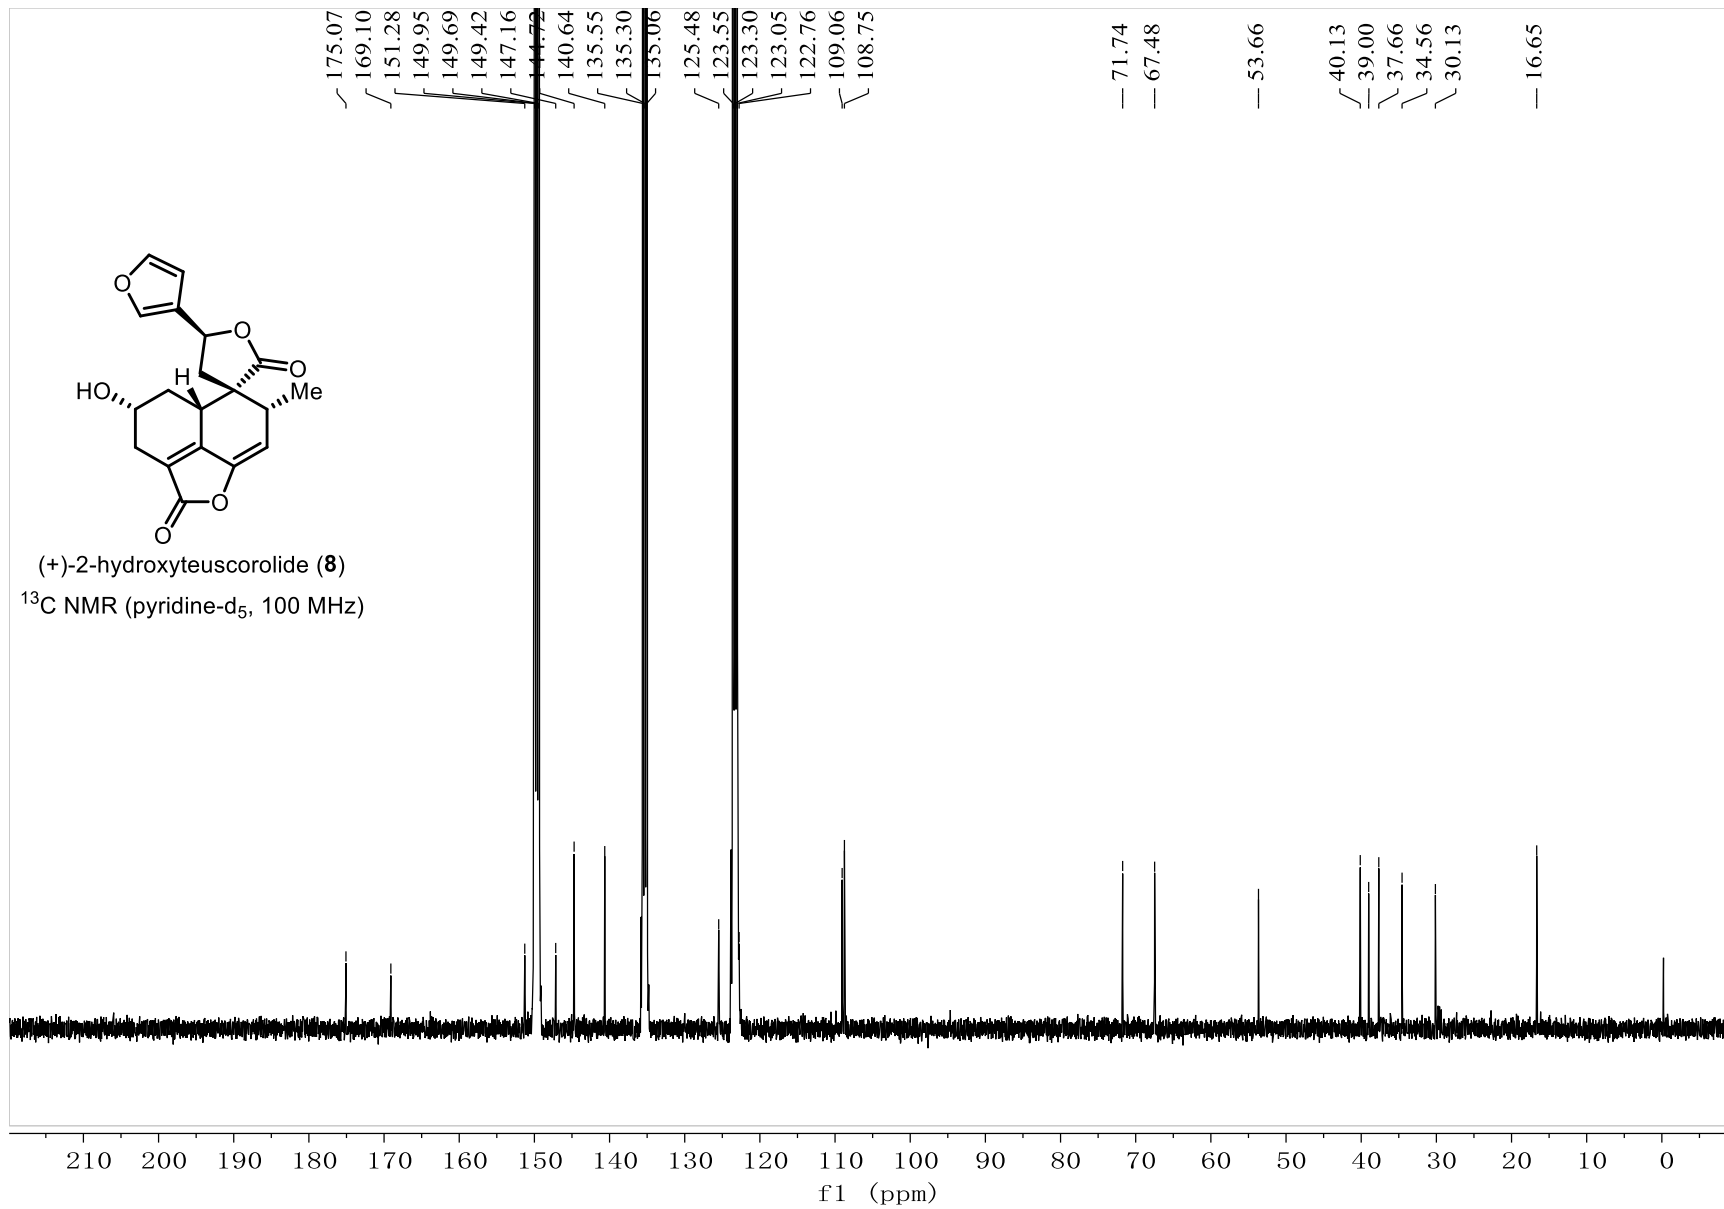

Supplement: d3sc04335e1.pdf [file d3sc04335e1.pdf]
